# Supplementary material for: Real-time bottom-up characterization of protein mixtures enabled by online microdroplet-assisted enzymatic digestion (MAED)
Source: Royal Society of Chemistry journal article supplement (doi:10.1039/d3cc03509c), 2023-01-01
Supplement: d3cc03509c2.zip [file d3cc03509c2.zip]

## Sheet: Protein
Protein IDs	Majority protein IDs	Peptide counts (all)	Peptide counts (razor+unique)	Peptide counts (unique)	Protein names	Gene names	Fasta headers	Number of proteins	Peptides	Razor + unique peptides	Unique peptides	Peptides Brain_BU_LongerGradient_250um	Razor + unique peptides Brain_BU_LongerGradient_250um	Unique peptides Brain_BU_LongerGradient_250um	Sequence coverage [%]	Unique + razor sequence coverage [%]	Unique sequence coverage [%]	Mol. weight [kDa]	Sequence length	Sequence lengths	Q-value	Score	Sequence coverage Brain_BU_LongerGradient_250um [%]	Intensity	Intensity Brain_BU_LongerGradient_250um	MS/MS count	Peptide sequences	Only identified by site	Reverse	Potential contaminant	id	Peptide IDs	Peptide is razor	Mod. peptide IDs	Evidence IDs	MS/MS IDs	Best MS/MS	Oxidation (M) site IDs	Oxidation (M) site positions	Taxonomy IDs
G5E829;Q9R0K7	G5E829;Q9R0K7	3;2	3;2	3;2	Plasma membrane calcium-transporting ATPase 1;Plasma membrane calcium-transporting ATPase 2	Atp2b1;Atp2b2	sp|G5E829|AT2B1_MOUSE Plasma membrane calcium-transporting ATPase 1 OS=Mus musculus OX=10090 GN=Atp2b1 PE=1 SV=1;sp|Q9R0K7|AT2B2_MOUSE Plasma membrane calcium-transporting ATPase 2 OS=Mus musculus OX=10090 GN=Atp2b2 PE=1 SV=2	2	3	3	3	3	3	3	2.9	2.9	2.9	134.75	1220	1220;1198	0	17.205	2.9	1491100	1491100	3	ERIDKIWPKL;IEDPVRPEVPEA;VKYGDLLPADGIL				0	104;230;568	True;True;True	104;233;571	117;261;638	135;312;770	135;312;770			-1;-1
Q91W97;O08528;P17710	Q91W97;O08528;P17710	1;1;1	1;1;1	1;1;1	Putative hexokinase HKDC1;Hexokinase-2;Hexokinase-1	Hkdc1;Hk2;Hk1	sp|Q91W97|HKDC1_MOUSE Hexokinase HKDC1 OS=Mus musculus OX=10090 GN=Hkdc1 PE=2 SV=1;sp|O08528|HXK2_MOUSE Hexokinase-2 OS=Mus musculus OX=10090 GN=Hk2 PE=1 SV=1;sp|P17710|HXK1_MOUSE Hexokinase-1 OS=Mus musculus OX=10090 GN=Hk1 PE=1 SV=3	3	1	1	1	1	1	1	0.8	0.8	0.8	102.26	915	915;917;974	0.0054054	5.8527	0.8	431540	431540	0	VKMLPTF				1	562	TRUE	565	632	762	762			-1;-1;-1
O08553;Q62188;O35098	O08553	17;1;1	17;1;1	16;0;1	Dihydropyrimidinase-related protein 2	Dpysl2	sp|O08553|DPYL2_MOUSE Dihydropyrimidinase-related protein 2 OS=Mus musculus OX=10090 GN=Dpysl2 PE=1 SV=2	3	17	17	16	17	17	16	32.2	32.2	30.2	62.277	572	572;570;572	0	132.26	32.2	85004000	85004000	24	EEQQRILDL;HVDITEWHKGIQE;HVDITEWHKGIQEEM;HVTEGSGRYIPRKPFPDF;IIDHVVPEPGTSL;IIDHVVPEPGTSLL;LGITGPEGHVLSRPEE;LIKGGKIVNDDQSF;LIVPGGVKTIE;SLSGAQIDDNIPRRTTQRIVAPPGGRA;TLIPEGTNGTEERM;VHTRFQMPDQGMTSADD;VHTRFQMPDQGMTSADDF;VIWDPDSVKTIS;VIWDPDSVKTISA;VTSPPLSPDPTTPDF;VTSPPLSPDPTTPDFL				2	95;218;219;220;243;244;330;338;344;489;508;553;554;560;561;588;589	True;True;True;True;True;True;True;True;True;True;True;True;True;True;True;True;True	95;221;222;223;246;247;333;341;347;492;511;556;557;563;564;591;592	108;248;249;250;251;274;275;377;385;392;552;573;623;624;630;631;662;663	126;295;296;297;298;299;300;301;327;328;329;456;457;467;475;664;688;689;749;750;760;761;798;799	126;295;296;298;327;329;457;467;475;664;689;749;750;760;761;798;799			-1;-1;-1
O08599	O08599	5	5	5	Syntaxin-binding protein 1	Stxbp1	sp|O08599|STXB1_MOUSE Syntaxin-binding protein 1 OS=Mus musculus OX=10090 GN=Stxbp1 PE=1 SV=2	1	5	5	5	5	5	5	9.9	9.9	9.9	67.568	594	594	0	30.058	9.9	9643500	9643500	5	AHLGVPIVT;DRGFDPSSPVL;IGSTHILTPQKL;ILDRGFDPSSPVL;KAVVGEKIMHDVIKKVKKKGEWKVL				3	24;72;240;262;294	True;True;True;True;True	24;72;243;265;297	24;82;271;293;333	29;97;323;350;394	29;97;323;350;394			-1
O08709	O08709	1	1	1	Peroxiredoxin-6	Prdx6	sp|O08709|PRDX6_MOUSE Peroxiredoxin-6 OS=Mus musculus OX=10090 GN=Prdx6 PE=1 SV=3	1	1	1	1	1	1	1	7.1	7.1	7.1	24.87	224	224	0	9.9339	7.1	1059700	1059700	1	YNGETPTEKLPFPIID				4	660	TRUE	663	744	890	890			-1
O08749	O08749	1	1	1	Dihydrolipoyl dehydrogenase, mitochondrial	Dld	sp|O08749|DLDH_MOUSE Dihydrolipoyl dehydrogenase, mitochondrial OS=Mus musculus OX=10090 GN=Dld PE=1 SV=2	1	1	1	1	1	1	1	1.6	1.6	1.6	54.272	509	509	0.004717	5.5753	1.6	2276200	2276200	1	IEIPEVRL				5	233	TRUE	236	264	315	315			-1
O09117	O09117	1	1	1	Synaptophysin-like protein 1	Sypl1	sp|O09117|SYPL1_MOUSE Synaptophysin-like protein 1 OS=Mus musculus OX=10090 GN=Sypl1 PE=1 SV=2	1	1	1	1	1	1	1	5	5	5	28.899	261	261	0.0056497	5.9291	5	428700	428700	1	QINLNPLKEPLGF				6	461	TRUE	464	522	630	630			-1
O35129	O35129	1	1	1	Prohibitin-2	Phb2	sp|O35129|PHB2_MOUSE Prohibitin-2 OS=Mus musculus OX=10090 GN=Phb2 PE=1 SV=1	1	1	1	1	1	1	1	2.7	2.7	2.7	33.296	299	299	0	6.7945	2.7	214720	214720	1	FRIPWFQY				7	168	TRUE	171	194	233	233			-1
O35343	O35343	1	1	1	Importin subunit alpha-3	Kpna4	sp|O35343|IMA3_MOUSE Importin subunit alpha-3 OS=Mus musculus OX=10090 GN=Kpna4 PE=1 SV=1	1	1	1	1	1	1	1	2.7	2.7	2.7	57.922	521	521	0.0093458	5.5628	2.7	60806	60806	1	VIDSGIVPHLVPLL				8	556	TRUE	559	626	752	752			-1
O35633	O35633	2	2	2	Vesicular inhibitory amino acid transporter	Slc32a1	sp|O35633|VIAAT_MOUSE Vesicular inhibitory amino acid transporter OS=Mus musculus OX=10090 GN=Slc32a1 PE=1 SV=3	1	2	2	2	2	2	2	2.1	2.1	2.1	57.38	525	525	0	12.79	2.1	152140	152140	2	KALLSYPLPFF;LSYPLPFF				9	293;367	True;True	296;370	332;416	393;504	393;504			-1
O35682	O35682	1	1	1	Myeloid-associated differentiation marker	Myadm	sp|O35682|MYADM_MOUSE Myeloid-associated differentiation marker OS=Mus musculus OX=10090 GN=Myadm PE=1 SV=2	1	1	1	1	1	1	1	3.1	3.1	3.1	35.284	320	320	0	6.6112	3.1	29854	29854	1	NVLPIPFPTF				10	422	TRUE	425	479	577	577			-1
P61294;P35279;Q8BHD0;Q99P58;Q9ERI2;O35963;Q64008;Q5RI75	P61294;P35279;Q8BHD0;Q99P58;Q9ERI2;O35963;Q64008;Q5RI75	1;1;1;1;1;1;1;1	1;1;1;1;1;1;1;1	1;1;1;1;1;1;1;1	Ras-related protein Rab-6B;Ras-related protein Rab-6A;Ras-related protein Rab-39A;Ras-related protein Rab-27B;Ras-related protein Rab-27A;Ras-related protein Rab-33B;Ras-related protein Rab-34;Ras and EF-hand domain-containing protein homolog	Rab6b;Rab6a;Rab39a;Rab27b;Rab27a;Rab33b;Rab34;Rasef	sp|P61294|RAB6B_MOUSE Ras-related protein Rab-6B OS=Mus musculus OX=10090 GN=Rab6b PE=1 SV=1;sp|P35279|RAB6A_MOUSE Ras-related protein Rab-6A OS=Mus musculus OX=10090 GN=Rab6a PE=1 SV=4;sp|Q8BHD0|RB39A_MOUSE Ras-related protein Rab-39A OS=Mus musculus OX=1	8	1	1	1	1	1	1	5.3	5.3	5.3	23.461	208	208;208;217;218;221;229;259;627	0	7.1489	5.3	1421400	1421400	1	QLWDTAGQERF				11	463	TRUE	466	524	632	632			-1;-1;-1;-1;-1;-1;-1;-1
O55100	O55100	1	1	1	Synaptogyrin-1	Syngr1	sp|O55100|SNG1_MOUSE Synaptogyrin-1 OS=Mus musculus OX=10090 GN=Syngr1 PE=1 SV=2	1	1	1	1	1	1	1	6.4	6.4	6.4	25.652	234	234	0.0048309	5.615	6.4	0	0	1	YGAGKAGGAFDPYTL				12	643	TRUE	646	727	871	871			-1
O55126	O55126	1	1	1	Protein NipSnap homolog 2	Gbas	sp|O55126|NIPS2_MOUSE Protein NipSnap homolog 2 OS=Mus musculus OX=10090 GN=Nipsnap2 PE=1 SV=1	1	1	1	1	1	1	1	5	5	5	32.932	281	281	0	6.7856	5	1135700	1135700	0	WNEPVPRPGPNIYE				13	620	TRUE	623	701	843	843			-1
P42208;O55131	P42208;O55131	1;1	1;1	1;1	Septin-2;Septin-7	Sept2;Sept7	sp|P42208|SEPT2_MOUSE Septin-2 OS=Mus musculus OX=10090 GN=Septin2 PE=1 SV=2;sp|O55131|SEPT7_MOUSE Septin-7 OS=Mus musculus OX=10090 GN=Septin7 PE=1 SV=1	2	1	1	1	1	1	1	3.6	3.6	3.6	41.525	361	361;436	0	6.8878	3.6	760330	760330	1	MVVGESGLGKSTL				14	402	TRUE	405	456	549	549			-1;-1
O55143	O55143	1	1	1	Sarcoplasmic/endoplasmic reticulum calcium ATPase 2	Atp2a2	sp|O55143|AT2A2_MOUSE Sarcoplasmic/endoplasmic reticulum calcium ATPase 2 OS=Mus musculus OX=10090 GN=Atp2a2 PE=1 SV=2	1	1	1	1	1	1	1	0.9	0.9	0.9	114.86	1044	1044	0.0090498	5.5184	0.9	0	0	1	YVEPLPLIF				15	670	TRUE	673	754	901	901			-1
O88342	O88342	1	1	1	WD repeat-containing protein 1	Wdr1	sp|O88342|WDR1_MOUSE WD repeat-containing protein 1 OS=Mus musculus OX=10090 GN=Wdr1 PE=1 SV=3	1	1	1	1	1	1	1	1.7	1.7	1.7	66.406	606	606	0.0055249	5.8924	1.7	0	0	1	FEGPPFKFKF				16	117	TRUE	117	131	152	152			-1
O88935	O88935	5	5	4	Synapsin-1	Syn1	sp|O88935|SYN1_MOUSE Synapsin-1 OS=Mus musculus OX=10090 GN=Syn1 PE=1 SV=2	1	5	5	4	5	5	4	10.8	10.8	9.8	74.096	706	706	0	30.276	10.8	12288000	12288000	5	CDKPWVF;EVLRNGVKVVRSLKPDF;FNLPEPAPPRPSL;PLIDQTFYPNHKEML;RASTAAPVASPAAPSPGSSGGGGF				17	61;107;153;446;470	True;True;True;True;True	61;107;153;449;473	70;120;174;506;532	83;138;201;202;606;641	83;138;202;606;641			-1
P00397	P00397	2	2	2	Cytochrome c oxidase subunit 1	Mtco1	sp|P00397|COX1_MOUSE Cytochrome c oxidase subunit 1 OS=Mus musculus OX=10090 GN=Mtco1 PE=1 SV=2	1	2	2	2	2	2	2	1.6	1.6	1.6	56.909	514	514	0	12.639	1.6	1403700	1403700	2	FVHWFPLF;VHWFPLF				18	192;555	True;True	195;558	220;625	265;751	265;751			-1
P00416	P00416	2	2	2	Cytochrome c oxidase subunit 3	mt-Co3	sp|P00416|COX3_MOUSE Cytochrome c oxidase subunit 3 OS=Mus musculus OX=10090 GN=mt-Co3 PE=1 SV=2	1	2	2	2	2	2	2	10.7	10.7	10.7	29.922	261	261	0	15.981	10.7	415280	415280	2	YHSSLVPTHDLGGCWPPTGISPLNPLE;YHSSLVPTHDLGGCWPPTGISPLNPLEV				19	649;650	True;True	652;653	733;734	879;880	879;880			-1
P00791;P70269;Q9D7R7;P18242;O09043	P00791	33;2;1;1;1	33;2;1;1;1	33;2;1;1;1			sp|P00791|PEPA_PIG Pepsin A OS=Sus scrofa OX=9823 GN=PGA PE=1 SV=3	5	33	33	33	33	33	33	43.1	43.1	43.1	41.262	385	385;397;392;410;419	0	323.31	43.1	70333000	70333000	35	ALIGDEPLENYL;ALIGDEPLENYLDTEY;ASGATPVF;DRANNKVGLAPVA;FGTIGIGTPAQD;FGTIGIGTPAQDF;FTVIFDTGSSNL;GLAYPSISASGATPVFDNL;IGDEPLE;IGDEPLENYLDTEY;LAYPSISASGATPVFDNL;LYYAPFDGIL;LYYAPFDGILG;LYYAPFDGILGL;LYYAPFDGILGLAY;MDVPTSSGELWILGDVFIRQYYTVFDRANNKVGLAPVA;NWVPVSVEGY;PSISASGATPVF;PSISASGATPVFDNL;TINGVQYPLSPSAY;VGGISDTNQIFGL;VGGISDTNQIFGLS;VGGISDTNQIFGLSETEPGSF;VGGISDTNQIFGLSETEPGSFL;VPTSSGELWILGDVFIRQYYTVFDR…				20	31;32;42;71;129;130;191;201;235;236;318;381;382;383;384;388;424;449;450;505;537;538;539;540;579;603;614;615;616;673;674;675;676	True;True;True;True;True;True;True;True;True;True;True;True;True;True;True;True;True;True;True;True;True;True;True;True;True;True;True;True;True;True;True;True;True	31;32;42;71;129;130;194;204;238;239;321;384;385;386;387;391;427;452;453;508;540;541;542;543;582;606;617;618;619;676;677;678;679	33;34;44;81;148;149;219;229;266;267;363;433;434;435;436;440;481;509;510;570;606;607;608;609;610;651;679;693;694;695;757;758;759;760	42;43;54;95;96;171;172;264;275;318;319;439;524;525;526;527;532;579;611;612;685;731;732;733;734;735;785;818;834;835;836;904;905;906;907	42;43;54;96;171;172;264;275;318;319;439;524;525;526;527;532;579;611;612;685;731;732;733;735;785;818;834;835;836;904;905;906;907			-1;-1;-1;-1;-1
P00848	P00848	3	3	3	ATP synthase subunit a	Mtatp6	sp|P00848|ATP6_MOUSE ATP synthase subunit a OS=Mus musculus OX=10090 GN=Mtatp6 PE=1 SV=1	1	3	3	3	3	3	3	11.5	11.5	11.5	25.095	226	226	0	38.009	11.5	9089000	9089000	4	AHFLPQGTPISL;LGLLPHTFTPTTQ;LGLLPHTFTPTTQL				21	23;333;334	True;True;True	23;336;337	23;380;381	28;460;461;462	28;460;461			-1
P00920	P00920	3	3	3	Carbonic anhydrase 2	Ca2	sp|P00920|CAH2_MOUSE Carbonic anhydrase 2 OS=Mus musculus OX=10090 GN=Ca2 PE=1 SV=4	1	3	3	3	3	3	3	14.6	14.6	14.6	29.032	260	260	0	18.984	14.6	5632800	5632800	3	ATAQHDPALQPLL;HLVHWNTKYGDF;WTYPGSLTTPPLL				22	49;216;628	True;True;True	49;219;631	56;246;709	67;293;852	67;293;852			-1
P01942;P06467	P01942	6;1	6;1	6;1	Hemoglobin subunit alpha	Hba	sp|P01942|HBA_MOUSE Hemoglobin subunit alpha OS=Mus musculus OX=10090 GN=Hba PE=1 SV=2	2	6	6	6	6	6	6	40.8	40.8	40.8	15.085	142	142;142	0	50.41	40.8	82044000	82044000	14	ASHHPADFTPAVHASL;KLLSHCLL;PTTKTYFPHF;TTKTYFPHF;VLSGEDKSNIKAAWGKIGGHGAE;VLSGEDKSNIKAAWGKIGGHGAEY				23	43;304;451;516;570;571	True;True;True;True;True;True	43;307;454;519;573;574	45;46;346;511;512;581;640;641;642;643	55;56;411;613;614;615;616;617;618;619;698;772;773;774;775	55;411;614;698;773;775			-1;-1
P02088;P02089	P02088;P02089	4;3	4;3	4;3	Hemoglobin subunit beta-1;Hemoglobin subunit beta-2	Hbb-b1;Hbb-b2	sp|P02088|HBB1_MOUSE Hemoglobin subunit beta-1 OS=Mus musculus OX=10090 GN=Hbb-b1 PE=1 SV=2;sp|P02089|HBB2_MOUSE Hemoglobin subunit beta-2 OS=Mus musculus OX=10090 GN=Hbb-b2 PE=1 SV=2	2	4	4	4	4	4	4	24.5	24.5	24.5	15.84	147	147;147	0	28.52	24.5	38616000	38616000	6	FRLLGNM;IVIVLGHHLGKDFTPAAQ;IVLGHHLGKDFTPAAQAA;VVYPWTQRY				24	170;287;288;600	True;True;True;True	173;290;291;603	196;323;324;325;675	235;384;385;386;812;813	235;384;385;813			-1;-1
P03888	P03888	2	2	2	NADH-ubiquinone oxidoreductase chain 1	Mtnd1	sp|P03888|NU1M_MOUSE NADH-ubiquinone oxidoreductase chain 1 OS=Mus musculus OX=10090 GN=Mtnd1 PE=1 SV=3	1	2	2	2	2	2	2	6.9	6.9	6.9	36.059	318	318	0	12.803	6.9	1181700	1181700	2	LWKNFLPLTL;WVPLPMPHPLIN				25	380;631	True;True	383;634	432;712	523;855	523;855			-1
P03893	P03893	3	3	3	NADH-ubiquinone oxidoreductase chain 2	Mtnd2	sp|P03893|NU2M_MOUSE NADH-ubiquinone oxidoreductase chain 2 OS=Mus musculus OX=10090 GN=mt-Nd2 PE=1 SV=2	1	3	3	3	3	3	3	7	7	7	38.752	345	345	0	17.697	7	990390	990390	2	LSLGGLPPLTGF;LTWQKIAPLSIL;WQKIAPLSIL				26	365;372;622	True;True;True	368;375;625	414;423;703	502;511;845	502;511;845			-1
P03930	P03930	1	1	1	ATP synthase protein 8	Mtatp8	sp|P03930|ATP8_MOUSE ATP synthase protein 8 OS=Mus musculus OX=10090 GN=Mtatp8 PE=1 SV=1	1	1	1	1	1	1	1	32.8	32.8	32.8	7.7662	67	67	0.0050505	5.6636	32.8	1357600	1357600	1	KVKTPWELKWTKIYLPHSLPQQ				27	310	TRUE	313	354	427	427			-1
P03995	P03995	1	1	1	Glial fibrillary acidic protein	Gfap	sp|P03995|GFAP_MOUSE Glial fibrillary acidic protein OS=Mus musculus OX=10090 GN=Gfap PE=1 SV=4	1	1	1	1	1	1	1	3.5	3.5	3.5	49.899	430	430	0.0047847	5.5887	3.5	0	0	1	SLSRMTPPLPARVDF				28	490	TRUE	493	553	665	665			-1
P04370	P04370	7	7	7	Myelin basic protein	Mbp	sp|P04370|MBP_MOUSE Myelin basic protein OS=Mus musculus OX=10090 GN=Mbp PE=1 SV=2	1	7	7	7	7	7	7	32	32	32	27.167	250	250	0	41.845	32	143280000	143280000	8	ASQKRPSQRSKY;ASQKRPSQRSKYLAT;ASTMDHARHGFLPRHRDTGIL;FSGDRGAPKRGSGKDSHTRTTHYGSLPQKSQHGRTQDEN;FSGDRGAPKRGSGKDSHTRTTHYGSLPQKSQHGRTQDENPVVHF;LATASTMDHARHGFLPRHRDTGIL;STMDHARHGFLPRHRDTGIL				29	45;46;47;179;180;317;494	True;True;True;True;True;True;True	45;46;47;182;183;320;497	48;49;50;51;52;53;54;206;207;361;362;557	58;59;60;61;62;63;64;65;248;249;436;437;438;670	60;63;65;248;249;437;670			-1
P05063	P05063	7	5	5	Fructose-bisphosphate aldolase C	Aldoc	sp|P05063|ALDOC_MOUSE Fructose-bisphosphate aldolase C OS=Mus musculus OX=10090 GN=Aldoc PE=1 SV=4	1	7	5	5	7	5	5	18.7	11.8	11.8	39.394	363	363	0	58.127	18.7	15555000	15555000	5	FSYGRALQA;IKVDKGVVPLAGTDGETTTQGLDGLL;NAINRCPLPRPWALT;PEILPDGDHDLKRCQY;VGIKVDKGVVPLAGTDGETTTQGL;VGIKVDKGVVPLAGTDGETTTQGLDGL;VGIKVDKGVVPLAGTDGETTTQGLDGLL				30	187;255;406;431;543;544;545	False;True;True;False;True;True;True	190;258;409;434;546;547;548	215;286;460;461;489;490;491;613;614;615	260;341;555;556;587;588;589;590;739;740;741	260;341;556;590;739;740;741			-1
P05064;Q91Y97	P05064	9;1	9;1	7;0	Fructose-bisphosphate aldolase A	Aldoa	sp|P05064|ALDOA_MOUSE Fructose-bisphosphate aldolase A OS=Mus musculus OX=10090 GN=Aldoa PE=1 SV=2	2	9	9	7	9	9	7	26.6	26.6	19.8	39.355	364	364;364	0	101.93	26.6	74875000	74875000	16	AADESTGSIAKRLQSIGTE;FSYGRALQA;IKVDKGVVPLAGTNGETTTQGL;IKVDKGVVPLAGTNGETTTQGLDG;IKVDKGVVPLAGTNGETTTQGLDGL;IKVDKGVVPLAGTNGETTTQGLDGLSE;NAINKCPLL;PEILPDGDHDLKRCQY;PHPYPALTPEQKKELSD				31	1;187;256;257;258;259;405;431;438	True;True;True;True;True;True;True;True;True	1;190;259;260;261;262;408;434;441	1;215;287;288;289;290;459;489;490;491;498	1;2;260;342;343;344;345;346;347;553;554;587;588;589;590;598	1;260;342;343;346;347;554;590;598			-1;-1
P05201	P05201	2	2	2	Aspartate aminotransferase, cytoplasmic	Got1	sp|P05201|AATC_MOUSE Aspartate aminotransferase, cytoplasmic OS=Mus musculus OX=10090 GN=Got1 PE=1 SV=3	1	2	2	2	2	2	2	5.8	5.8	5.8	46.247	413	413	0	11.073	5.8	3909000	3909000	2	VSSPTWENHNAVF;YRTDESQPWVL				32	585;669	True;True	588;672	659;753	795;900	795;900			-1
P05202	P05202	5	5	5	Aspartate aminotransferase, mitochondrial	Got2	sp|P05202|AATM_MOUSE Aspartate aminotransferase, mitochondrial OS=Mus musculus OX=10090 GN=Got2 PE=1 SV=1	1	5	5	5	5	5	5	12.3	12.3	12.3	47.411	430	430	0	50.586	12.3	43996000	43996000	8	IRPLYSNPPLNG;ISKIPEQSVL;KILIRPLYSNPPLNG;VFLPKPSWGNHTPIF;WTHVEMGPPDPIL				33	272;275;303;534;627	True;True;True;True;True	275;278;306;537;630	304;307;344;345;600;601;708	364;367;409;410;724;725;726;851	364;367;409;726;851			-1
P68373;P68369;P05213;P05214;Q9JJZ2	P68373;P68369;P05213;P05214	30;30;30;25;13	30;30;30;25;13	2;2;2;1;0	Tubulin alpha-1C chain;Tubulin alpha-1A chain;Tubulin alpha-1B chain;Tubulin alpha-3 chain	Tuba1c;Tuba1a;Tuba1b;Tuba3a	sp|P68373|TBA1C_MOUSE Tubulin alpha-1C chain OS=Mus musculus OX=10090 GN=Tuba1c PE=1 SV=1;sp|P68369|TBA1A_MOUSE Tubulin alpha-1A chain OS=Mus musculus OX=10090 GN=Tuba1a PE=1 SV=1;sp|P05213|TBA1B_MOUSE Tubulin alpha-1B chain OS=Mus musculus OX=10090 GN=Tub	5	30	30	2	30	30	2	36.1	36.1	6.2	49.909	449	449;451;451;450;449	0	323.31	36.1	466830000	466830000	59	AVVEPYNSIL;DHKFDLM;DRIRKLADQCTGL;FQTNLVPYPRIHF;FQTNLVPYPRIHFPLA;FQTNLVPYPRIHFPLAT;FSETGAGKHVPRAVF;IERPTYTNL;KVGINYQPPTVVPGGD;KVGINYQPPTVVPGGDL;KVGINYQPPTVVPGGDLA;LRFDGAL;LVFHSFGGGTGSGF;LVPYPRIHFPLAT;NLVPYPRIHFPLAT;PYPRIHFPLAT;QTNLVPYPRIHF;QTNLVPYPRIHFPLAT;SIYPAPQVST;SIYPAPQVSTA;TEFQTNLVPYPRIHFPLAT;TNLVPYPRIHFPLAT;VFHSFGGGTGSGF;VPYPRIHF;VPYPRIHFPLAT;VVEPYNSIL;WARLDHKFDLM;YCLEHGIQPDGQMPSD;YCLEHGIQP…				34	58;68;73;162;164;165;178;234;306;307;308;358;374;377;416;458;465;466;486;487;501;511;533;580;582;594;604;636;637;668	True;True;True;True;True;True;True;True;True;True;True;True;True;True;True;True;True;True;True;True;True;True;True;True;True;True;True;True;True;True	58;68;73;165;167;168;181;237;309;310;311;361;377;380;419;461;468;469;489;490;504;514;536;583;585;597;607;639;640;671	67;78;83;186;187;189;190;191;204;205;265;348;349;350;351;407;425;428;472;473;519;526;527;528;549;550;565;576;599;652;654;655;668;680;681;682;718;719;752	79;80;92;98;222;223;224;226;227;228;229;230;246;247;316;317;413;414;415;416;417;418;419;420;421;422;423;493;513;514;517;569;570;627;634;635;636;659;660;661;662;680;692;722;723;786;788;789;790;791;805;819;820;821;822;861;862;863;898;899	79;92;98;224;226;227;247;317;415;420;423;493;513;517;570;627;634;635;659;661;680;692;723;786;789;805;820;861;863;899			-1;-1;-1;-1;-1
P06151	P06151	4	4	4	L-lactate dehydrogenase A chain	Ldha	sp|P06151|LDHA_MOUSE L-lactate dehydrogenase A chain OS=Mus musculus OX=10090 GN=Ldha PE=1 SV=3	1	4	4	4	4	4	4	13.3	13.3	13.3	36.498	332	332	0	32.249	13.3	6055500	6055500	2	FIIPNIVKYSPHCKL;KFIIPNIVKYSPHCKL;MIKGLYGINE;WVLGEHGDSSVPVWSGVN				35	133;296;393;630	True;True;True;True	133;299;396;633	152;335;447;711	175;396;539;854	175;396;539;854			-1
P06745	P06745	5	5	5	Glucose-6-phosphate isomerase	Gpi	sp|P06745|G6PI_MOUSE Glucose-6-phosphate isomerase OS=Mus musculus OX=10090 GN=Gpi PE=1 SV=4	1	5	5	5	5	5	5	11.8	11.8	11.8	62.766	558	558	0	32.937	11.8	7532500	7532500	6	FLIPVQTQHPIRKGLHHKILL;IGIGGSDLGPLM;LKTPLEKNAPVL;PEVNRVLDKMKSF;TKLTPFIL				36	147;237;347;432;506	True;True;True;True;True	147;240;350;435;509	167;268;395;492;571	192;320;478;479;591;686	192;320;478;591;686			-1
P07724	P07724	1	1	1	Serum albumin	Alb	sp|P07724|ALBU_MOUSE Albumin OS=Mus musculus OX=10090 GN=Alb PE=1 SV=3	1	1	1	1	1	1	1	2	2	2	68.692	608	608	0	9.9926	2	0	0	1	AEFQPLVEEPKN				37	10	TRUE	10	10	12	12			-1
P08249	P08249	11	11	11	Malate dehydrogenase, mitochondrial	Mdh2	sp|P08249|MDHM_MOUSE Malate dehydrogenase, mitochondrial OS=Mus musculus OX=10090 GN=Mdh2 PE=1 SV=3	1	11	11	11	11	11	11	29.6	29.6	29.6	35.611	338	338	0	80.58	29.6	42973000	42973000	12	AKVAVLGASGGIGQPLSLLLKNSPLVSRLTL;GASGGIGQPLSL;LGKKGLEKNLGIGKITPFE;LLKNSPLVSRL;NVKGYLGPEQLPDCL;PARVNVPVIGGHAGKTIIPLIS;PARVNVPVIGGHAGKTIIPLISQ;PVIGGHAGKTIIPLIS;PVIGGHAGKTIIPLISQ;PVIGGHAGKTIIPLISQC;TPKVDFPQDQL				38	29;198;331;351;421;427;428;453;454;455;512	True;True;True;True;True;True;True;True;True;True;True	29;201;334;354;424;430;431;456;457;458;515	31;226;378;399;400;478;484;485;486;514;515;516;577	40;271;458;483;484;576;582;583;584;621;622;623;624;693	40;271;458;483;576;582;584;621;623;624;693			-1
P09411;P09041	P09411	6;1	6;1	6;1	Phosphoglycerate kinase 1	Pgk1	sp|P09411|PGK1_MOUSE Phosphoglycerate kinase 1 OS=Mus musculus OX=10090 GN=Pgk1 PE=1 SV=4	2	6	6	6	6	6	6	19.9	19.9	19.9	44.55	417	417;417	0	37.068	19.9	9441900	9441900	5	FAKALESPERPFL;LESPERPFL;MSHLGRPDGVPMPDKY;RVDFNVPMKNNQITNNQ;VGVNLPQKAGGF;YDEEGAKIVKDLMSKAEKNGVKITL				39	110;327;399;479;550;638	True;True;True;True;True;True	110;330;402;482;553;641	124;374;453;542;620;720;721	143;452;545;652;746;864;865	143;452;545;652;746;865			-1;-1
P62984;P62983;P0CG49;P0CG50	P62984;P62983;P0CG49;P0CG50	2;2;2;2	2;2;2;2	2;2;2;2	Ubiquitin-60S ribosomal protein L40;Ubiquitin;60S ribosomal protein L40;Ubiquitin-40S ribosomal protein S27a;Ubiquitin;40S ribosomal protein S27a;Polyubiquitin-B;Ubiquitin;Polyubiquitin-C;Ubiquitin;Ubiquitin-related 1;Ubiquitin-related 2	Uba52;Rps27a;Ubb;Ubc	sp|P62984|RL40_MOUSE Ubiquitin-60S ribosomal protein L40 OS=Mus musculus OX=10090 GN=Uba52 PE=1 SV=2;sp|P62983|RS27A_MOUSE Ubiquitin-40S ribosomal protein S27a OS=Mus musculus OX=10090 GN=Rps27a PE=1 SV=2;sp|P0CG49|UBB_MOUSE Polyubiquitin-B OS=Mus musculus	4	2	2	2	2	2	2	25	25	25	14.728	128	128;156;305;734	0	10.825	25	7551400	7551400	0	NVKAKIQDKEGIPPDQQRLIF;VKTLTGKTITL				40	419;563	True;True	422;566	476;633	574;763	574;763			-1;-1;-1;-1
P0DP28;P0DP27;P0DP26;Q9D6P8;P09541	P0DP28;P0DP27;P0DP26	3;3;3;1;1	3;3;3;1;1	3;3;3;1;1			sp|P0DP28|CALM3_MOUSE Calmodulin-3 OS=Mus musculus OX=10090 GN=Calm3 PE=1 SV=1;sp|P0DP27|CALM2_MOUSE Calmodulin-2 OS=Mus musculus OX=10090 GN=Calm2 PE=1 SV=1;sp|P0DP26|CALM1_MOUSE Calmodulin-1 OS=Mus musculus OX=10090 GN=Calm1 PE=1 SV=1	5	3	3	3	3	3	3	19.5	19.5	19.5	16.837	149	149;149;149;149;193	0	17.675	19.5	14040000	14040000	5	AELRHVMTNL;FKEAFSL;MARKMKDTDSEE				41	13;134;386	True;True;True	13;134;389	13;153;438	16;176;177;529;530	16;176;530			-1;-1;-1;-1;-1
P10126	P10126	6	4	4	Elongation factor 1-alpha 1	Eef1a1	sp|P10126|EF1A1_MOUSE Elongation factor 1-alpha 1 OS=Mus musculus OX=10090 GN=Eef1a1 PE=1 SV=3	1	6	4	4	6	4	4	7.8	5	5	50.113	462	462	0	26.156	7.8	5741000	5741000	3	FSDYPPLGRF;IILNHPGQISAG;MLEPSANMPWF;MLEPSANMPWFKG;SDYPPLGRF;VIILNHPGQISAG				42	177;247;395;396;481;557	True;False;True;True;True;False	180;250;398;399;484;560	203;278;449;450;544;627	245;332;541;542;654;753;754;755	245;332;541;542;654;754			-1
P10852	P10852	1	1	1	4F2 cell-surface antigen heavy chain	Slc3a2	sp|P10852|4F2_MOUSE 4F2 cell-surface antigen heavy chain OS=Mus musculus OX=10090 GN=Slc3a2 PE=1 SV=1	1	1	1	1	1	1	1	1.7	1.7	1.7	58.336	526	526	0	6.8216	1.7	0	0	1	FTLPGTPVF				43	190	TRUE	193	218	263	263			-1
P11627	P11627	1	1	1	Neural cell adhesion molecule L1	L1cam	sp|P11627|L1CAM_MOUSE Neural cell adhesion molecule L1 OS=Mus musculus OX=10090 GN=L1cam PE=1 SV=1	1	1	1	1	1	1	1	1.1	1.1	1.1	140.97	1260	1260	0	10.016	1.1	554210	554210	1	LVVGSPGPVPHLEL				44	379	TRUE	382	431	522	522			-1
P11798;Q6PHZ2;Q923T9;P28652	P11798;Q6PHZ2;Q923T9;P28652	2;2;2;2	2;2;2;2	2;2;2;2	Calcium/calmodulin-dependent protein kinase type II subunit alpha;Calcium/calmodulin-dependent protein kinase type II subunit delta;Calcium/calmodulin-dependent protein kinase type II subunit gamma;Calcium/calmodulin-dependent protein kinase type II subunit beta	Camk2a;Camk2d;Camk2g;Camk2b	sp|P11798|KCC2A_MOUSE Calcium/calmodulin-dependent protein kinase type II subunit alpha OS=Mus musculus OX=10090 GN=Camk2a PE=1 SV=2;sp|Q6PHZ2|KCC2D_MOUSE Calcium/calmodulin-dependent protein kinase type II subunit delta OS=Mus musculus OX=10090 GN=Camk2d	4	2	2	2	2	2	2	2.3	2.3	2.3	54.114	478	478;499;529;542	0	12.623	2.3	1196100	1196100	1	VGYPPFWDE;VGYPPFWDEDQ				45	551;552	True;True	554;555	621;622	747;748	747;748			-1;-1;-1;-1
P14094	P14094	6	6	6	Sodium/potassium-transporting ATPase subunit beta-1	Atp1b1	sp|P14094|AT1B1_MOUSE Sodium/potassium-transporting ATPase subunit beta-1 OS=Mus musculus OX=10090 GN=Atp1b1 PE=1 SV=1	1	6	6	6	6	6	6	12.2	12.2	12.2	35.194	304	304	0	45.945	12.2	25743000	25743000	9	LQPKYLQPLL;PYYGKLLQPKYLQPLL;TQIPQIQKTEISF;YGFPLQYYPYY;YGFPLQYYPYYGKL;YPYYGKLLQPKYLQPLL				46	357;459;514;644;645;664	True;True;True;True;True;True	360;462;517;647;648;667	406;520;579;728;729;748	490;491;492;628;695;696;872;873;894	491;628;696;872;873;894			-1
P14152	P14152	3	3	3	Malate dehydrogenase, cytoplasmic	Mdh1	sp|P14152|MDHC_MOUSE Malate dehydrogenase, cytoplasmic OS=Mus musculus OX=10090 GN=Mdh1 PE=1 SV=3	1	3	3	3	3	3	3	16.2	16.2	16.2	36.511	334	334	0	23.641	16.2	13281000	13281000	3	IWFGTPEGEF;LTASKSAPSIPKENF;VIIWGNHSSTQYPDVNHAKVKLQGKEVGV				47	291;368;558	True;True;True	294;371;561	329;417;418;628	390;505;506;756	390;505;756			-1
P15105	P15105	7	7	7	Glutamine synthetase	Glul	sp|P15105|GLNA_MOUSE Glutamine synthetase OS=Mus musculus OX=10090 GN=Glul PE=1 SV=6	1	7	7	7	7	7	7	19.3	19.3	19.3	42.119	373	373	0	88.481	19.3	22947000	22947000	10	FRDPFRKDPNKLVL;MGTDGHPFGWPSNGFPGPQGPY;MGTDGHPFGWPSNGFPGPQGPYY;MGTDGHPFGWPSNGFPGPQGPYYCG;MSLPQGEKVQAM;MVSNQHPWFG;TFDPKPIPGNW				48	167;390;391;392;400;401;504	True;True;True;True;True;True;True	170;393;394;395;403;404;507	193;442;443;444;445;446;454;455;569	232;534;535;536;537;538;546;547;548;684	232;534;536;538;546;548;684			-1
P16125	P16125	8	8	8	L-lactate dehydrogenase B chain	Ldhb	sp|P16125|LDHB_MOUSE L-lactate dehydrogenase B chain OS=Mus musculus OX=10090 GN=Ldhb PE=1 SV=2	1	8	8	8	8	8	8	8.1	8.1	8.1	36.572	334	334	0	52.23	8.1	9432900	9432900	8	FKFIIPQIV;FKFIIPQIVKY;FKFIIPQIVKYSPDCT;FKFIIPQIVKYSPDCTI;KFIIPQIVKY;KFIIPQIVKYSPDCT;KFIIPQIVKYSPDCTI;WDIQKDLKDL				49	135;136;137;138;297;298;299;605	True;True;True;True;True;True;True;True	135;136;137;138;300;301;302;608	154;155;156;157;336;337;338;683;684	178;179;180;181;397;398;399;823;824	178;179;180;181;397;398;399;823			-1
P16330	P16330	7	7	7	2,3-cyclic-nucleotide 3-phosphodiesterase	Cnp	sp|P16330|CN37_MOUSE 2,3-cyclic-nucleotide 3-phosphodiesterase OS=Mus musculus OX=10090 GN=Cnp PE=1 SV=3	1	7	7	7	7	7	7	24	24	24	47.123	420	420	0	52.862	24	28961000	28961000	8	EELGNHKAFKKELRHFISGDEPKEKLEL;FKLSISAL;ILRGLPGSGKSTL;LVEPKTAWRL;SSSGAKEKPELQF;YGKGKPVPIHGSRKGGAM;YKIIPGSRADF				50	94;141;263;373;493;646;654	True;True;True;True;True;True;True	94;141;266;376;496;649;657	107;160;294;295;424;556;730;738	125;184;351;352;353;512;668;669;874;884	125;184;352;512;669;874;884			-1
P16858;Q64467	P16858	25;2	25;2	25;2	Glyceraldehyde-3-phosphate dehydrogenase	Gapdh	sp|P16858|G3P_MOUSE Glyceraldehyde-3-phosphate dehydrogenase OS=Mus musculus OX=10090 GN=Gapdh PE=1 SV=2	2	25	25	25	25	25	25	63.1	63.1	63.1	35.81	333	333;440	0	220.51	63.1	202320000	202320000	40	APLAKVIHDNF;APLAKVIHDNFG;ATQKTVDGPSGKL;DDIKKVVKQASEGPLKGIL;EKAGAHLKGGAKRVIISAPSADAPMF;FQYDSTHGKFNGTVKAENGKL;FRVPTPNVS;FRVPTPNVSV;IKWGEAGAEY;INDPFIDL;KVIPELNGKLTGMA;LAPLAKVIHDNF;NIIPASTGAAKAVG;NIIPASTGAAKAVGKVIPEL;PLAKVIHDNF;RLEKPAKYDDIKKVVKQASEGPLKGILG;TCRLEKPAKYDDIKKVVKQASEGPLKGIL;TCRLEKPAKYDDIKKVVKQASEGPLKGILG;TTMEKAGAHLKGGAKRVIISAPSADAPMF;VINGKPITIF;VKVGVNGF;VKVGVNGFGRIGRL;VKVGVNGFGRIGRLVT;VMG…				51	35;36;51;66;97;166;175;176;261;266;309;315;410;411;444;475;498;499;517;559;564;565;566;572;623	True;True;True;True;True;True;True;True;True;True;True;True;True;True;True;True;True;True;True;True;True;True;True;True;True	35;36;51;66;97;169;178;179;264;269;312;318;413;414;447;478;501;502;520;562;567;568;569;575;626	37;38;58;75;110;192;201;202;292;298;352;353;359;466;467;504;537;538;561;562;563;582;583;629;634;635;636;644;704	46;47;69;89;128;231;240;241;242;243;244;349;356;424;425;426;433;562;563;604;646;647;674;675;676;677;678;699;700;701;757;758;759;764;765;766;767;768;776;846	46;47;69;89;128;231;242;244;349;356;424;433;562;563;604;646;675;676;699;758;764;765;768;776;846			-1;-1
P17182;P21550	P17182	7;3	7;3	4;0	Alpha-enolase	Eno1	sp|P17182|ENOA_MOUSE Alpha-enolase OS=Mus musculus OX=10090 GN=Eno1 PE=1 SV=3	2	7	7	4	7	7	4	17.7	17.7	14.1	47.14	434	434;434	0	46.731	17.7	31596000	31596000	10	AGNPEVILPVPAF;ATNVGDEGGFAPNIL;FKSPDDPSRYITPDQL;IEDPFDQDD;LAGNPEVILPVPAF;MILPVGA;VYHNLKNVIKEKYGKDATNVGDEGGFAPNIL				52	22;50;143;229;312;394;602	True;True;True;True;True;True;True	22;50;143;232;315;397;605	22;57;162;163;260;356;448;677;678	26;27;68;186;187;188;311;430;540;816;817	26;68;188;311;430;540;816			-1;-1
P17183	P17183	4	1	1	Gamma-enolase	Eno2	sp|P17183|ENOG_MOUSE Gamma-enolase OS=Mus musculus OX=10090 GN=Eno2 PE=1 SV=2	1	4	1	1	4	1	1	9	1.8	1.8	47.296	434	434	0	7.1426	9	1991500	1991500	2	ATNVGDEGGFAPNIL;IEDPFDQDD;LILPVPAF;MILPVGA				53	50;229;339;394	False;False;True;False	50;232;342;397	57;260;386;387;448	68;311;468;469;540	68;311;468;540			-1
P17426	P17426	3	3	2	AP-2 complex subunit alpha-1	Ap2a1	sp|P17426|AP2A1_MOUSE AP-2 complex subunit alpha-1 OS=Mus musculus OX=10090 GN=Ap2a1 PE=1 SV=1	1	3	3	2	3	3	2	3.4	3.4	2.7	107.66	977	977	0	18.238	3.4	1746200	1746200	3	FVPAPWL;IAGDPRSSPPVQF;QNFLPTVVHPGDL				54	193;226;464	True;True;True	196;229;467	221;257;525	266;307;308;633	266;308;633			-1
P17427	P17427	2	1	1	AP-2 complex subunit alpha-2	Ap2a2	sp|P17427|AP2A2_MOUSE AP-2 complex subunit alpha-2 OS=Mus musculus OX=10090 GN=Ap2a2 PE=1 SV=2	1	2	1	1	2	1	1	2.1	1.4	1.4	104.02	938	938	0.0051282	5.6887	2.1	1188900	1188900	1	FVPAPWL;IAGDPRSSPLIQF				55	193;225	False;True	196;228	221;256	266;306	266;306			-1
P17665	P17665	1	1	1	Cytochrome c oxidase subunit 7C, mitochondrial	Cox7c	sp|P17665|COX7C_MOUSE Cytochrome c oxidase subunit 7C, mitochondrial OS=Mus musculus OX=10090 GN=Cox7c PE=1 SV=1	1	1	1	1	1	1	1	25.4	25.4	25.4	7.3325	63	63	0	10.192	25.4	574580	574580	1	SHYEEGPGKNLPFSVE				56	485	TRUE	488	548	658	658			-1
P17742	P17742	5	5	5	Peptidyl-prolyl cis-trans isomerase A;Peptidyl-prolyl cis-trans isomerase A, N-terminally processed	Ppia	sp|P17742|PPIA_MOUSE Peptidyl-prolyl cis-trans isomerase A OS=Mus musculus OX=10090 GN=Ppia PE=1 SV=2	1	5	5	5	5	5	5	29.9	29.9	29.9	17.971	164	164	0	38.73	29.9	37778000	37778000	8	AKTEWLDGKHVVF;DDEPLGRVSF;FADKVPKTAENF;FDITADDEPLGRVSFEL;HRIIPGF				57	28;65;108;113;217	True;True;True;True;True	28;65;108;113;220	28;29;30;74;121;127;247	35;36;37;38;39;88;139;147;294	39;88;139;147;294			-1
P17751	P17751	2	2	2	Triosephosphate isomerase	Tpi1	sp|P17751|TPIS_MOUSE Triosephosphate isomerase OS=Mus musculus OX=10090 GN=Tpi1 PE=1 SV=5	1	2	2	2	2	2	2	7.6	7.6	7.6	26.712	249	249	0	11.783	7.6	4993300	4993300	2	IKDLGATW;LVGGASLKPEF				58	253;375	True;True	256;378	284;426	338;515	338;515			-1
P18165	P18165	1	1	1	Loricrin	Lor	sp|P18165|LORI_MOUSE Loricrin OS=Mus musculus OX=10090 GN=Loricrin PE=1 SV=2	1	1	1	1	1	1	1	14	14	14	38.2	486	486	0.0048544	5.6152	14	0	0	1	PCPPVGCGKTSGGGGGGGGGGGGGYYSGGGSGCGGGSSGGGSSCGGGGGGSYGGGSSCGGGGGSGGGV				59	429	TRUE	432	487	585	585			-1
P18760	P18760	1	1	1	Cofilin-1	Cfl1	sp|P18760|COF1_MOUSE Cofilin-1 OS=Mus musculus OX=10090 GN=Cfl1 PE=1 SV=3	1	1	1	1	1	1	1	9	9	9	18.559	166	166	0	7.2845	9	3403400	3403400	1	VGDVGQTVDDPYTTF				60	536	TRUE	539	605	730	730			-1
P19157	P19157	1	1	1	Glutathione S-transferase P 1	Gstp1	sp|P19157|GSTP1_MOUSE Glutathione S-transferase P 1 OS=Mus musculus OX=10090 GN=Gstp1 PE=1 SV=2	1	1	1	1	1	1	1	12.4	12.4	12.4	23.609	210	210	0	17.24	12.4	5882800	5882800	2	IYTNYENGKNDYVKALPGHLKPFETL				61	292	TRUE	295	330;331	391;392	392			-1
P19246	P19246	1	1	1	Neurofilament heavy polypeptide	Nefh	sp|P19246|NFH_MOUSE Neurofilament heavy polypeptide OS=Mus musculus OX=10090 GN=Nefh PE=1 SV=3	1	1	1	1	1	1	1	1.1	1.1	1.1	116.99	1090	1090	0	6.3663	1.1	203850	203850	0	CRIGFGPSPFSL				62	62	TRUE	62	71	84	84			-1
P19536	P19536	3	3	3	Cytochrome c oxidase subunit 5B, mitochondrial	Cox5b	sp|P19536|COX5B_MOUSE Cytochrome c oxidase subunit 5B, mitochondrial OS=Mus musculus OX=10090 GN=Cox5b PE=1 SV=1	1	3	3	3	3	3	3	29.7	29.7	29.7	13.813	128	128	0	27.92	29.7	4646300	4646300	3	IAAQKGLDPYNMLPPKAASGTKEDPNL;IAAQKGLDPYNMLPPKAASGTKEDPNLVPSISN;IAAQKGLDPYNMLPPKAASGTKEDPNLVPSISNKRIVG				63	221;222;223	True;True;True	224;225;226	252;253;254	302;303;304	302;303;304			-1
P19783	P19783	1	1	1	Cytochrome c oxidase subunit 4 isoform 1, mitochondrial	Cox4i1	sp|P19783|COX41_MOUSE Cytochrome c oxidase subunit 4 isoform 1, mitochondrial OS=Mus musculus OX=10090 GN=Cox4i1 PE=1 SV=2	1	1	1	1	1	1	1	5.9	5.9	5.9	19.53	169	169	0.0051546	5.7121	5.9	3784500	3784500	1	YVYGPIPHTF				64	672	TRUE	675	756	903	903			-1
P20357	P20357	1	1	1	Microtubule-associated protein 2	Map2	sp|P20357|MTAP2_MOUSE Microtubule-associated protein 2 OS=Mus musculus OX=10090 GN=Map2 PE=1 SV=2	1	1	1	1	1	1	1	0.7	0.7	0.7	199.13	1828	1828	0.0047393	5.5817	0.7	1058100	1058100	0	PISPGPLTPMRE				65	442	TRUE	445	502	602	602			-1
P20917	P20917	3	3	3	Myelin-associated glycoprotein	Mag	sp|P20917|MAG_MOUSE Myelin-associated glycoprotein OS=Mus musculus OX=10090 GN=Mag PE=1 SV=3	1	3	3	3	3	3	3	4.6	4.6	4.6	69.387	627	627	0	34.472	4.6	5633300	5633300	3	FNSPYPKNYPPVVF;SWLGHEGLGEPTVL;YFNSPYPKNYPPVVF				66	154;496;642	True;True;True	154;499;645	175;559;726	203;672;870	203;672;870			-1
P26443	P26443	1	1	1	Glutamate dehydrogenase 1, mitochondrial	Glud1	sp|P26443|DHE3_MOUSE Glutamate dehydrogenase 1, mitochondrial OS=Mus musculus OX=10090 GN=Glud1 PE=1 SV=1	1	1	1	1	1	1	1	2.2	2.2	2.2	61.336	558	558	0	7.253	2.2	1773800	1773800	1	FEWLKNLNHVSY				67	121	TRUE	121	138	161	161			-1
P26883	P26883	1	1	1	Peptidyl-prolyl cis-trans isomerase FKBP1A	Fkbp1a	sp|P26883|FKB1A_MOUSE Peptidyl-prolyl cis-trans isomerase FKBP1A OS=Mus musculus OX=10090 GN=Fkbp1a PE=1 SV=2	1	1	1	1	1	1	1	16.7	16.7	16.7	11.922	108	108	0	10.203	16.7	6016900	6016900	2	YAYGATGHPGIIPPHATL				68	635	TRUE	638	716;717	859;860	859			-1
P30275	P30275	3	1	1	Creatine kinase U-type, mitochondrial	Ckmt1	sp|P30275|KCRU_MOUSE Creatine kinase U-type, mitochondrial OS=Mus musculus OX=10090 GN=Ckmt1 PE=1 SV=1	1	3	1	1	3	1	1	6.9	4.5	4.5	47.003	418	418	0.004902	5.6324	6.9	3446800	3446800	1	ARDWPDARGIWHNNEKSFL;FDKPVSPLL;LFDKPVSPLL				69	40;114;328	True;False;False	40;114;331	42;128;375	52;148;149;453;454	52;148;454			-1
P31648	P31648	2	2	1	Sodium- and chloride-dependent GABA transporter 1	Slc6a1	sp|P31648|SC6A1_MOUSE Sodium- and chloride-dependent GABA transporter 1 OS=Mus musculus OX=10090 GN=Slc6a1 PE=1 SV=2	1	2	2	1	2	2	1	3.7	3.7	2.2	67.001	599	599	0	12.479	3.7	390550	390550	1	IGLGNVWRF;YVFPKWGQGVGWL				70	238;671	True;True	241;674	269;755	321;902	321;902			-1
P31938;Q63932	P31938;Q63932	1;1	1;1	1;1	Dual specificity mitogen-activated protein kinase kinase 1;Dual specificity mitogen-activated protein kinase kinase 2	Map2k1;Map2k2	sp|P31938|MP2K1_MOUSE Dual specificity mitogen-activated protein kinase kinase 1 OS=Mus musculus OX=10090 GN=Map2k1 PE=1 SV=2;sp|Q63932|MP2K2_MOUSE Dual specificity mitogen-activated protein kinase kinase 2 OS=Mus musculus OX=10090 GN=Map2k2 PE=1 SV=2	2	1	1	1	1	1	1	3.8	3.8	3.8	43.474	393	393;401	0	7.2922	3.8	916580	916580	1	YIVNEPPPKLPSGVF				71	653	TRUE	656	737	883	883			-1;-1
P34884	P34884	1	1	1	Macrophage migration inhibitory factor	Mif	sp|P34884|MIF_MOUSE Macrophage migration inhibitory factor OS=Mus musculus OX=10090 GN=Mif PE=1 SV=2	1	1	1	1	1	1	1	13	13	13	12.504	115	115	0	7.801	13	0	0	2	IVNTNVPRASVPEGF				72	289	TRUE	292	326;327	387;388	388			-1
P35486	P35486	1	1	1	Pyruvate dehydrogenase E1 component subunit alpha, somatic form, mitochondrial	Pdha1	sp|P35486|ODPA_MOUSE Pyruvate dehydrogenase E1 component subunit alpha, somatic form, mitochondrial OS=Mus musculus OX=10090 GN=Pdha1 PE=1 SV=1	1	1	1	1	1	1	1	1.8	1.8	1.8	43.231	390	390	0	6.8008	1.8	1535800	1535800	1	WKLPCIF				73	618	TRUE	621	699	841	841			-1
P35564	P35564	2	2	2	Calnexin	Canx	sp|P35564|CALX_MOUSE Calnexin OS=Mus musculus OX=10090 GN=Canx PE=1 SV=1	1	2	2	2	2	2	2	2.4	2.4	2.4	67.277	591	591	0	17.477	2.4	1860700	1860700	2	EDLEPFKMTPFSA;FEDLEPFKMTPFSA				74	93;116	True;True	93;116	106;130	124;151	124;151			-1
P35700	P35700	1	1	1	Peroxiredoxin-1	Prdx1	sp|P35700|PRDX1_MOUSE Peroxiredoxin-1 OS=Mus musculus OX=10090 GN=Prdx1 PE=1 SV=1	1	1	1	1	1	1	1	11.1	11.1	11.1	22.176	199	199	0	7.5414	11.1	718800	718800	1	AWINTPKKQGGLGPMNIPLISD				75	59	TRUE	59	68	81	81			-1
P39053	P39053	2	1	1	Dynamin-1	Dnm1	sp|P39053|DYN1_MOUSE Dynamin-1 OS=Mus musculus OX=10090 GN=Dnm1 PE=1 SV=2	1	2	1	1	2	1	1	3.9	1.6	1.6	97.802	867	867	0	7.4825	3.9	2942500	2942500	1	AETDRVTGTNKGISPVPINL;TKVPVGDQPPDIEF				76	18;507	False;True	18;510	18;572	22;687	22;687			-1
P39054;Q8BZ98	P39054;Q8BZ98	3;2	3;2	2;2	Dynamin-2;Dynamin-3	Dnm2;Dnm3	sp|P39054|DYN2_MOUSE Dynamin-2 OS=Mus musculus OX=10090 GN=Dnm2 PE=1 SV=2;sp|Q8BZ98|DYN3_MOUSE Dynamin-3 OS=Mus musculus OX=10090 GN=Dnm3 PE=1 SV=1	2	3	3	2	3	3	2	4.6	4.6	2.3	98.144	870	870;863	0	29.955	4.6	2790200	2790200	3	AETDRVTGTNKGISPVPINL;IDLPGITKVPVGDQPPDIE;IDLPGITKVPVGDQPPDIEY				77	18;227;228	True;True;True	18;230;231	18;258;259	22;309;310	22;309;310			-1;-1
P40124	P40124	1	1	1	Adenylyl cyclase-associated protein 1	Cap1	sp|P40124|CAP1_MOUSE Adenylyl cyclase-associated protein 1 OS=Mus musculus OX=10090 GN=Cap1 PE=1 SV=4	1	1	1	1	1	1	1	5.9	5.9	5.9	51.564	474	474	0.0056818	5.9417	5.9	665280	665280	1	LSGLPSGPSVGSGPPPPPPGPPPPPIST				78	364	TRUE	367	413	501	501			-1
P40142	P40142	2	2	2	Transketolase	Tkt	sp|P40142|TKT_MOUSE Transketolase OS=Mus musculus OX=10090 GN=Tkt PE=1 SV=1	1	2	2	2	2	2	2	4.2	4.2	4.2	67.63	623	623	0	13.592	4.2	3746200	3746200	1	IRMPTPPSY;RVLDPFTIKPLDRKLIL				79	270;480	True;True	273;483	302;543	362;653	362;653			-1
P42669	P42669	1	1	1	Transcriptional activator protein Pur-alpha	Pura	sp|P42669|PURA_MOUSE Transcriptional activator protein Pur-alpha OS=Mus musculus OX=10090 GN=Pura PE=1 SV=1	1	1	1	1	1	1	1	4.7	4.7	4.7	34.883	321	321	0	7.0757	4.7	1321700	1321700	1	IEHYAQLGPSQPPDL				80	231	TRUE	234	262	313	313			-1
P42932	P42932	1	1	1	T-complex protein 1 subunit theta	Cct8	sp|P42932|TCPQ_MOUSE T-complex protein 1 subunit theta OS=Mus musculus OX=10090 GN=Cct8 PE=1 SV=3	1	1	1	1	1	1	1	1.8	1.8	1.8	59.555	548	548	0	6.275	1.8	0	0	0	ALHVPKAPGF				81	30	TRUE	30	32	41	41			-1
P43006	P43006	3	3	3	Excitatory amino acid transporter 2	Slc1a2	sp|P43006|EAA2_MOUSE Excitatory amino acid transporter 2 OS=Mus musculus OX=10090 GN=Slc1a2 PE=1 SV=1	1	3	3	3	3	3	3	5.1	5.1	5.1	62.03	572	572	0	20.082	5.1	8138700	8138700	3	IAFPGDIL;LIIHGGIF;LRLASPIHPDVVM				82	224;337;360	True;True;True	227;340;363	255;384;409	305;466;496;497	305;466;496			-1
P46096;P46097	P46096	5;2	5;2	5;2	Synaptotagmin-1	Syt1	sp|P46096|SYT1_MOUSE Synaptotagmin-1 OS=Mus musculus OX=10090 GN=Syt1 PE=1 SV=1	2	5	5	5	5	5	5	13.3	13.3	13.3	47.417	421	421;422	0	43.974	13.3	11656000	11656000	5	EAKNLKKMDVGGLSDPYVKIHL;FKVPMNTVD;FKVPYSEL;FTFKVPYSEL;PALDMGGTSDPYVKV				83	92;144;145;189;426	True;True;True;True;True	92;144;145;192;429	104;105;164;165;217;483	122;123;189;190;262;581	123;189;190;262;581			-1;-1
P46460	P46460	4	4	4	Vesicle-fusing ATPase	Nsf	sp|P46460|NSF_MOUSE Vesicle-fusing ATPase OS=Mus musculus OX=10090 GN=Nsf PE=1 SV=2	1	4	4	4	4	4	4	6.3	6.3	6.3	82.613	744	744	0	24.408	6.3	4686700	4686700	3	FSTTIHVPNIATGEQL;IIKWGDPVT;LDYVPIGPRF;MREEGASPLDFD				84	182;246;320;398	True;True;True;True	185;249;323;401	210;277;366;452	253;331;442;544	253;331;442;544			-1
P46660	P46660	1	1	1	Alpha-internexin	Ina	sp|P46660|AINX_MOUSE Alpha-internexin OS=Mus musculus OX=10090 GN=Ina PE=1 SV=3	1	1	1	1	1	1	1	2.4	2.4	2.4	55.382	501	501	0	6.3065	2.4	859720	859720	0	ISGLNPLPNPSY				85	274	TRUE	277	306	366	366			-1
P47708	P47708	1	1	1	Rabphilin-3A	Rph3a	sp|P47708|RP3A_MOUSE Rabphilin-3A OS=Mus musculus OX=10090 GN=Rph3a PE=1 SV=2	1	1	1	1	1	1	1	5.1	5.1	5.1	75.488	681	681	0	6.2652	5.1	1640200	1640200	1	AARPAPAPVPSPAPPQPVQPGPPGGSRATPGPGRF				86	8	TRUE	8	8	10	10			-1
P48193;Q9WV92	P48193;Q9WV92	1;1	1;1	1;1	Protein 4.1;Band 4.1-like protein 3;Band 4.1-like protein 3, N-terminally processed	Epb41;Epb41l3	sp|P48193|EPB41_MOUSE Protein 4.1 OS=Mus musculus OX=10090 GN=Epb41 PE=1 SV=2;sp|Q9WV92|E41L3_MOUSE Band 4.1-like protein 3 OS=Mus musculus OX=10090 GN=Epb41l3 PE=1 SV=1	2	1	1	1	1	1	1	1.4	1.4	1.4	95.91	858	858;929	0.0049751	5.6482	1.4	1138400	1138400	1	NVKFYPPDPAQL				87	420	TRUE	423	477	575	575			-1;-1
P48453	P48453	5	5	1	Serine/threonine-protein phosphatase 2B catalytic subunit beta isoform	Ppp3cb	sp|P48453|PP2BB_MOUSE Serine/threonine-protein phosphatase 2B catalytic subunit beta isoform OS=Mus musculus OX=10090 GN=Ppp3cb PE=1 SV=2	1	5	5	1	5	5	1	8	8	2.5	59.173	525	525	0	37.944	8	5097800	5097800	5	FNCSPHPYWLPNF;NCSPHPYWLPNF;TLKGLTPTGML;TLKGLTPTGMLPSGVL;VFDMDGIPRVDVL				88	152;407;509;510;531	True;True;True;True;True	152;410;512;513;534	173;462;574;575;597	200;557;690;691;720	200;557;690;691;720			-1
P48962	P48962	5	5	3	ADP/ATP translocase 1	Slc25a4	sp|P48962|ADT1_MOUSE ADP/ATP translocase 1 OS=Mus musculus OX=10090 GN=Slc25a4 PE=1 SV=4	1	5	5	3	5	5	3	27.9	27.9	21.5	32.904	298	298	0	50.424	27.9	11993000	11993000	6	DTAKGMLPDPKNVHIIV;FAFKDKYKQIF;GDQALSFLKDFLAGGIAAAVSKTAVAPIERVKLLL;KSDGLKGLYQGF;WRYFAGNL				89	82;109;199;305;624	True;True;True;True;True	82;109;202;308;627	93;122;123;227;347;705	111;140;141;142;272;273;412;847;848	111;141;273;412;848			-1
P50396	P50396	1	1	1	Rab GDP dissociation inhibitor alpha	Gdi1	sp|P50396|GDIA_MOUSE Rab GDP dissociation inhibitor alpha OS=Mus musculus OX=10090 GN=Gdi1 PE=1 SV=3	1	1	1	1	1	1	1	2	2	2	50.521	447	447	0	6.41	2	2185600	2185600	1	LLEPIDQKF				90	349	TRUE	352	397	481	481			-1
P50516	P50516	1	1	1	V-type proton ATPase catalytic subunit A	Atp6v1a	sp|P50516|VATA_MOUSE V-type proton ATPase catalytic subunit A OS=Mus musculus OX=10090 GN=Atp6v1a PE=1 SV=2	1	1	1	1	1	1	1	1.3	1.3	1.3	68.325	617	617	0.0050251	5.6519	1.3	1043300	1043300	1	VLRDFPEL				91	569	TRUE	572	639	771	771			-1
P51881	P51881	4	2	2	ADP/ATP translocase 2;ADP/ATP translocase 2, N-terminally processed	Slc25a5	sp|P51881|ADT2_MOUSE ADP/ATP translocase 2 OS=Mus musculus OX=10090 GN=Slc25a5 PE=1 SV=3	1	4	2	2	4	2	2	23.5	17.1	17.1	32.931	298	298	0	24.058	23.5	4269400	4269400	1	DTAKGMLPDPKNTHIF;FAFKDKYKQIF;TDAAVSFAKDFLAGGVAAAISKTAVAPIERVKLLL;WRYFAGNL				92	81;109;500;624	True;False;True;False	81;109;503;627	92;122;123;564;705	110;140;141;142;679;847;848	110;141;679;848			-1
P52480	P52480	2	2	2	Pyruvate kinase PKM	Pkm	sp|P52480|KPYM_MOUSE Pyruvate kinase PKM OS=Mus musculus OX=10090 GN=Pkm PE=1 SV=4	1	2	2	2	2	2	2	4.9	4.9	4.9	57.844	531	531	0	12.53	4.9	2663600	2663600	2	VDLPAVSEKDIQD;VTRNPQTARQAHL				93	525;587	True;True	528;590	591;661	712;797	712;797			-1
P56480	P56480	16	16	16	ATP synthase subunit beta, mitochondrial	Atp5b	sp|P56480|ATPB_MOUSE ATP synthase subunit beta, mitochondrial OS=Mus musculus OX=10090 GN=Atp5f1b PE=1 SV=2	1	16	16	16	16	16	16	28.9	28.9	28.9	56.3	529	529	0	138.66	28.9	78325000	78325000	24	DGTEGLVRGQKVLDSGAPIKIPVGPETL;DSGAPIKIPVGPETL;DVARGVQKILQD;FAPIHAEAPEF;FGGAGVGKTVL;GRIMNVIGEPIDE;GRIPSAVGYQPTL;LGRIPSAVGYQPTL;LINNVAKAHGGYSVF;LTDPAPATTF;LVRGQKVLDSGAPIKIPVGPETL;PIKIPVGPETL;RGPIKTKQFAPIHAEAPEF;VFTGHMGKLVPLKE;VRGQKVLDSGAPIKIPVGPETL;VYGQMNEPPGARARVAL				94	67;74;87;111;125;204;205;335;340;369;378;440;473;535;583;601	True;True;True;True;True;True;True;True;True;True;True;True;True;True;True;True	67;74;87;111;125;207;208;338;343;372;381;443;476;538;586;604	76;77;84;98;125;144;233;234;382;388;419;429;430;500;535;602;603;604;656;657;676	90;91;99;116;144;167;279;280;463;464;470;507;518;519;520;521;600;644;727;728;729;792;793;814;815	90;99;116;144;167;279;280;464;470;507;520;600;644;729;792;815			-1
P56564	P56564	1	1	1	Excitatory amino acid transporter 1	Slc1a3	sp|P56564|EAA1_MOUSE Excitatory amino acid transporter 1 OS=Mus musculus OX=10090 GN=Slc1a3 PE=1 SV=2	1	1	1	1	1	1	1	1.7	1.7	1.7	59.622	543	543	0.0054945	5.879	1.7	2873100	2873100	0	IRNMFPPNL				95	271	TRUE	274	303	363	363			-1
P60202	P60202	6	6	6	Myelin proteolipid protein	Plp1	sp|P60202|MYPR_MOUSE Myelin proteolipid protein OS=Mus musculus OX=10090 GN=Plp1 PE=1 SV=2	1	6	6	6	6	6	6	9	9	9	30.077	277	277	0	40.653	9	46968000	46968000	8	AVRQIFGDY;FQMTFHL;GVLPWNAF;VRQIFGDY;YGVLPWNA;YGVLPWNAF				96	57;161;208;584;647;648	True;True;True;True;True;True	57;163;164;211;587;650;651	66;184;185;237;658;731;732	78;220;221;283;794;875;876;877;878	78;220;283;794;875;877	0	235	-1
P63260;P60710;Q8BFZ3;P63268;P68134;P68033;P62737	P63260;P60710	11;11;5;4;4;4;4	11;11;5;4;4;4;4	11;11;5;4;4;4;4	Actin, cytoplasmic 2;Actin, cytoplasmic 2, N-terminally processed;Actin, cytoplasmic 1;Actin, cytoplasmic 1, N-terminally processed	Actg1;Actb	sp|P63260|ACTG_MOUSE Actin, cytoplasmic 2 OS=Mus musculus OX=10090 GN=Actg1 PE=1 SV=1;sp|P60710|ACTB_MOUSE Actin, cytoplasmic 1 OS=Mus musculus OX=10090 GN=Actb PE=1 SV=1	7	11	11	11	11	11	11	32.8	32.8	32.8	41.792	375	375;375;376;376;377;377;377	0	92.185	32.8	102670000	102670000	20	AGDDAPRAVF;DSGDGVTHTVPIYE;DSGDGVTHTVPIYEG;EKSYELPDGQVIT;GYALPHAIL;IGNERFRCPEAL;KIKIIAPPERKYSVW;LRVAPEEHPVL;LTEAPLNPKANREKMTQIM;WISKQEYDESGPSIVHRKCF;YALPHAIL				97	20;75;76;99;209;239;302;363;370;617;634	True;True;True;True;True;True;True;True;True;True;True	20;75;76;99;212;242;305;366;373;620;637	20;85;86;112;238;270;341;342;343;412;420;696;697;698;715	24;100;101;102;130;284;322;402;403;404;405;406;407;408;500;508;837;838;839;840;858	24;100;101;130;284;322;403;500;508;839;858			-1;-1;-1;-1;-1;-1;-1
P63001;P60764;P84096;Q05144;Q8R527;Q9ER71	P63001;P60764;P84096;Q05144;Q8R527;Q9ER71	2;2;1;1;1;1	1;1;0;0;0;0	1;1;0;0;0;0	Ras-related C3 botulinum toxin substrate 1;Ras-related C3 botulinum toxin substrate 3;Rho-related GTP-binding protein RhoG;Ras-related C3 botulinum toxin substrate 2;Rho-related GTP-binding protein RhoQ;Rho-related GTP-binding protein RhoJ	Rac1;Rac3;Rhog;Rac2;Rhoq;Rhoj	sp|P63001|RAC1_MOUSE Ras-related C3 botulinum toxin substrate 1 OS=Mus musculus OX=10090 GN=Rac1 PE=1 SV=1;sp|P60764|RAC3_MOUSE Ras-related C3 botulinum toxin substrate 3 OS=Mus musculus OX=10090 GN=Rac3 PE=1 SV=1;sp|P84096|RHOG_MOUSE Rho-related GTP-bindi	6	2	1	1	2	1	1	13	6.2	6.2	21.45	192	192;192;191;192;205;214	0.0091743	5.5504	13	1592400	1592400	1	VMVDGKPVNLGL;VVVGDGAVGKTCL				98	574;599	True;False	577;602	646;674	778;811	778;811			-1;-1;-1;-1;-1;-1
P60766	P60766	2	2	1	Cell division control protein 42 homolog	Cdc42	sp|P60766|CDC42_MOUSE Cell division control protein 42 homolog OS=Mus musculus OX=10090 GN=Cdc42 PE=1 SV=2	1	2	2	1	2	2	1	17.8	17.8	11	21.258	191	191	0	15.571	17.8	5704500	5704500	2	ENVKEKWVPEITHHCPKTPFL;VVVGDGAVGKTCL				99	102;599	True;True	102;602	115;674	133;811	133;811			-1
P62838;P61079	P62838;P61079	1;1	1;1	1;1	Ubiquitin-conjugating enzyme E2 D2;Ubiquitin-conjugating enzyme E2 D3	Ube2d2;Ube2d3	sp|P62838|UB2D2_MOUSE Ubiquitin-conjugating enzyme E2 D2 OS=Mus musculus OX=10090 GN=Ube2d2 PE=1 SV=1;sp|P61079|UB2D3_MOUSE Ubiquitin-conjugating enzyme E2 D3 OS=Mus musculus OX=10090 GN=Ube2d3 PE=1 SV=1	2	1	1	1	1	1	1	12.2	12.2	12.2	16.735	147	147;147	0	10.601	12.2	2674400	2674400	2	LTIHFPTDYPFKPPKVAF				100	371	TRUE	374	421;422	509;510	510			-1;-1
P61089	P61089	1	1	1	Ubiquitin-conjugating enzyme E2 N	Ube2n	sp|P61089|UBE2N_MOUSE Ubiquitin-conjugating enzyme E2 N OS=Mus musculus OX=10090 GN=Ube2n PE=1 SV=1	1	1	1	1	1	1	1	11.8	11.8	11.8	17.138	152	152	0	14.668	11.8	658200	658200	1	FHVVIAGPQDSPFEGGTF				101	131	TRUE	131	150	173	173			-1
P84084;P61750;Q8BSL7;P84078;P61205	P84084;P61750;Q8BSL7;P84078;P61205	2;2;2;2;2	2;2;2;2;2	2;2;2;2;2	ADP-ribosylation factor 5;ADP-ribosylation factor 4;ADP-ribosylation factor 2;ADP-ribosylation factor 1;ADP-ribosylation factor 3	Arf5;Arf4;Arf2;Arf1;Arf3	sp|P84084|ARF5_MOUSE ADP-ribosylation factor 5 OS=Mus musculus OX=10090 GN=Arf5 PE=1 SV=2;sp|P61750|ARF4_MOUSE ADP-ribosylation factor 4 OS=Mus musculus OX=10090 GN=Arf4 PE=1 SV=2;sp|Q8BSL7|ARF2_MOUSE ADP-ribosylation factor 2 OS=Mus musculus OX=10090 GN=A	5	2	2	2	2	2	2	20	20	20	20.529	180	180;180;181;181;181	0	14.662	20	7854100	7854100	3	TVWDVGGQDKIRPLWRHYFQNTQG;VGLDAAGKTTIL				102	520;548	True;True	523;551	586;618	705;706;744	705;744			-1;-1;-1;-1;-1
P61922	P61922	4	4	4	4-aminobutyrate aminotransferase, mitochondrial	Abat	sp|P61922|GABT_MOUSE 4-aminobutyrate aminotransferase, mitochondrial OS=Mus musculus OX=10090 GN=Abat PE=1 SV=1	1	4	4	4	4	4	4	8.8	8.8	8.8	56.451	500	500	0	23.755	8.8	4756500	4756500	4	ATTHSKAIHKIDIPSFDWPIAPF;ATTHSKAIHKIDIPSFDWPIAPFPRLKYPLEE;NTWLGDPSKNLL;WPIAPFPRLKYPLEE				103	53;54;418;621	True;True;True;True	53;54;421;624	61;62;475;702	72;73;573;844	72;73;573;844			-1
P62259	P62259	3	3	3	14-3-3 protein epsilon	Ywhae	sp|P62259|1433E_MOUSE 14-3-3 protein epsilon OS=Mus musculus OX=10090 GN=Ywhae PE=1 SV=1	1	3	3	3	3	3	3	12.9	12.9	12.9	29.174	255	255	0	21.48	12.9	9876000	9876000	4	DVLDKHLIPAANTGE;DVLDKHLIPAANTGESKVFY;TELPPTHPIRLGL				104	88;89;503	True;True;True	88;89;506	99;100;101;567;568	117;118;119;682;683	117;119;683			-1
P62307	P62307	1	1	1	Small nuclear ribonucleoprotein F	Snrpf	sp|P62307|RUXF_MOUSE Small nuclear ribonucleoprotein F OS=Mus musculus OX=10090 GN=Snrpf PE=1 SV=1	1	1	1	1	1	1	1	11.6	11.6	11.6	9.7251	86	86	0	6.5018	11.6	0	0	0	SLPLNPKPFL				105	488	TRUE	491	551	663	663			-1
P62631	P62631	7	7	5	Elongation factor 1-alpha 2	Eef1a2	sp|P62631|EF1A2_MOUSE Elongation factor 1-alpha 2 OS=Mus musculus OX=10090 GN=Eef1a2 PE=1 SV=1	1	7	7	5	7	7	5	15.3	15.3	12.5	50.454	463	463	0	52.162	15.3	15494000	15494000	9	DTILPPTRPTDKPLRLPLQD;DTILPPTRPTDKPLRLPLQDV;IILNHPGQISAG;MLEPSPNMPWFKG;VIILNHPGQISAG;YIKKIGYNPATVPFVPISGW;YIKKIGYNPATVPFVPISGWHGDN				106	83;84;247;397;557;651;652	True;True;True;True;True;True;True	83;84;250;400;560;654;655	94;95;278;451;627;735;736	112;113;332;543;753;754;755;881;882	112;113;332;543;754;881;882			-1
Q8BGZ1;P62761;Q91X97;P84075;P62748	Q8BGZ1;P62761;Q91X97;P84075;P62748	1;1;1;1;1	1;1;1;1;1	1;1;1;1;1	Hippocalcin-like protein 4;Visinin-like protein 1;Neurocalcin-delta;Neuron-specific calcium-binding protein hippocalcin;Hippocalcin-like protein 1	Hpcal4;Vsnl1;Ncald;Hpca;Hpcal1	sp|Q8BGZ1|HPCL4_MOUSE Hippocalcin-like protein 4 OS=Mus musculus OX=10090 GN=Hpcal4 PE=1 SV=3;sp|P62761|VISL1_MOUSE Visinin-like protein 1 OS=Mus musculus OX=10090 GN=Vsnl1 PE=1 SV=2;sp|Q91X97|NCALD_MOUSE Neurocalcin-delta OS=Mus musculus OX=10090 GN=Ncald	5	1	1	1	1	1	1	4.7	4.7	4.7	22.215	191	191;191;193;193;193	0.0093897	5.5652	4.7	3125000	3125000	2	FPYGDASKF				107	156	TRUE	156	177	205;206	205			-1;-1;-1;-1;-1
P62814	P62814	2	2	2	V-type proton ATPase subunit B, brain isoform	Atp6v1b2	sp|P62814|VATB2_MOUSE V-type proton ATPase subunit B, brain isoform OS=Mus musculus OX=10090 GN=Atp6v1b2 PE=1 SV=1	1	2	2	2	2	2	2	6.3	6.3	6.3	56.55	511	511	0	20.099	6.3	6211500	6211500	3	IVHLTLPDGTKRSGQVL;TYKTVSGVNGPLVIL				108	284;521	True;True	287;524	319;320;587	380;381;707	380;707			-1
P62874;P62880	P62874;P62880	2;1	2;1	2;1	Guanine nucleotide-binding protein G(I)/G(S)/G(T) subunit beta-1;Guanine nucleotide-binding protein G(I)/G(S)/G(T) subunit beta-2	Gnb1;Gnb2	sp|P62874|GBB1_MOUSE Guanine nucleotide-binding protein G(I)/G(S)/G(T) subunit beta-1 OS=Mus musculus OX=10090 GN=Gnb1 PE=1 SV=3;sp|P62880|GBB2_MOUSE Guanine nucleotide-binding protein G(I)/G(S)/G(T) subunit beta-2 OS=Mus musculus OX=10090 GN=Gnb2 PE=1 SV=	2	2	2	2	2	2	2	10.3	10.3	10.3	37.377	340	340;340	0	13.32	10.3	1945800	1945800	1	IIWDSYTTNKVHAIPLRSSW;SQITNNIDPVGRIQM				109	252;491	True;True	255;494	283;554	337;666	337;666			-1;-1
P62897;P00015	P62897;P00015	4;2	4;2	4;2	Cytochrome c, somatic;Cytochrome c, testis-specific	Cycs;Cyct	sp|P62897|CYC_MOUSE Cytochrome c, somatic OS=Mus musculus OX=10090 GN=Cycs PE=1 SV=2;sp|P00015|CYC2_MOUSE Cytochrome c, testis-specific OS=Mus musculus OX=10090 GN=Cyct PE=1 SV=3	2	4	4	4	4	4	4	33.3	33.3	33.3	11.605	105	105;105	0	22.809	33.3	4440100	4440100	3	FSYTDANKNKGITWGED;LENPKKYIPGTKMIF;SYTDANKNKGITWGEDTL;YLENPKKYIPGTKMIF				110	188;325;497;657	True;True;True;True	191;328;500;660	216;372;560;741	261;450;673;887	261;450;673;887			-1;-1
P63017;P17156	P63017	5;2	5;2	5;2	Heat shock cognate 71 kDa protein	Hspa8	sp|P63017|HSP7C_MOUSE Heat shock cognate 71 kDa protein OS=Mus musculus OX=10090 GN=Hspa8 PE=1 SV=1	2	5	5	5	5	5	5	15.8	15.8	15.8	70.87	646	646;633	0	33.027	15.8	13306000	13306000	6	FFNGKELNKSINPDEA;VGGSTRIPKIQKLLQD;VVNDAGRPKVQVEYKGETKSFYPEE;VVQSDMKHWPFM;YQSAGGMPGGMPGGFPGGGAPPSGGASSGPTIE				111	124;542;595;596;665	True;True;True;True;True	124;545;598;599;668	143;612;669;670;671;749	166;737;738;806;807;808;895	166;738;806;808;895			-1;-1
P63044	P63044	1	1	1	Vesicle-associated membrane protein 2	Vamp2	sp|P63044|VAMP2_MOUSE Vesicle-associated membrane protein 2 OS=Mus musculus OX=10090 GN=Vamp2 PE=1 SV=2	1	1	1	1	1	1	1	18.1	18.1	18.1	12.691	116	116	0	7.9419	18.1	3452600	3452600	2	ATVPPAAPAGEGGPPAPPPNL				112	55	TRUE	55	63;64	74;75	75			-1
P63082	P63082	2	2	2	V-type proton ATPase 16 kDa proteolipid subunit	Atp6v0c	sp|P63082|VATL_MOUSE V-type proton ATPase 16 kDa proteolipid subunit c OS=Mus musculus OX=10090 GN=Atp6v0c PE=1 SV=1	1	2	2	2	2	2	2	14.2	14.2	14.2	15.808	155	155	0	13.848	14.2	1652700	1652700	1	ADIKNNPEYSSF;IMKSIIPVVM				113	9;265	True;True	9;268	9;297	11;355	11;355			-1
P63101;Q9CQV8	P63101	6;2	6;2	6;2	14-3-3 protein zeta/delta	Ywhaz	sp|P63101|1433Z_MOUSE 14-3-3 protein zeta/delta OS=Mus musculus OX=10090 GN=Ywhaz PE=1 SV=1	2	6	6	6	6	6	6	14.7	14.7	14.7	27.771	245	245;246	0	49.513	14.7	54641000	54641000	13	EKFLIPNASQPESKVFY;FEISKKEMQPTHPIRL;FEISKKEMQPTHPIRLGL;LEKFLIPNASQPESKVF;LEKFLIPNASQPESKVFY;LIPNASQPESKVFY				114	98;118;119;322;323;341	True;True;True;True;True;True	98;118;119;325;326;344	111;132;133;134;135;136;368;369;370;389	129;153;154;155;156;157;158;159;445;446;447;448;471	129;154;158;445;446;471			-1;-1
Q9D0M5;P63168	Q9D0M5;P63168	1;1	1;1	1;1	Dynein light chain 2, cytoplasmic;Dynein light chain 1, cytoplasmic	Dynll2;Dynll1	sp|Q9D0M5|DYL2_MOUSE Dynein light chain 2, cytoplasmic OS=Mus musculus OX=10090 GN=Dynll2 PE=1 SV=1;sp|P63168|DYL1_MOUSE Dynein light chain 1, cytoplasmic OS=Mus musculus OX=10090 GN=Dynll1 PE=1 SV=1	2	1	1	1	1	1	1	12.4	12.4	12.4	10.35	89	89;89	0.0093023	5.5626	12.4	2326600	2326600	1	VTHETKHFIYF				115	586	TRUE	589	660	796	796			-1;-1
P63318	P63318	1	1	1	Protein kinase C gamma type	Prkcg	sp|P63318|KPCG_MOUSE Protein kinase C gamma type OS=Mus musculus OX=10090 GN=Prkcg PE=1 SV=1	1	1	1	1	1	1	1	2.7	2.7	2.7	78.357	697	697	0	6.4427	2.7	499440	499440	0	ARNLIPMDPNGLSDPYVKL				116	41	TRUE	41	43	53	53			-1
P63325	P63325	1	1	1	40S ribosomal protein S10	Rps10	sp|P63325|RS10_MOUSE 40S ribosomal protein S10 OS=Mus musculus OX=10090 GN=Rps10 PE=1 SV=1	1	1	1	1	1	1	1	7.9	7.9	7.9	18.916	165	165	0	9.1838	7.9	437200	437200	1	YLHLPPEIVPATL				117	658	TRUE	661	742	888	888			-1
P63328;P48455	P63328	5;2	1;0	1;0	Serine/threonine-protein phosphatase 2B catalytic subunit alpha isoform	Ppp3ca	sp|P63328|PP2BA_MOUSE Protein phosphatase 3 catalytic subunit alpha OS=Mus musculus OX=10090 GN=Ppp3ca PE=1 SV=1	2	5	1	1	5	1	1	8.1	2.5	2.5	58.643	521	521;513	0.0091324	5.542	8.1	2180700	2180700	1	FNCSPHPYWLPNF;NCSPHPYWLPNF;TLKGLTPTGML;TLKGLTPTGMLPSGVL;VFDNDGKPRVDIL				118	152;407;509;510;532	False;False;False;False;True	152;410;512;513;535	173;462;574;575;598	200;557;690;691;721	200;557;690;691;721			-1;-1
P67778	P67778	2	2	2	Prohibitin	Phb	sp|P67778|PHB1_MOUSE Prohibitin 1 OS=Mus musculus OX=10090 GN=Phb1 PE=1 SV=1	1	2	2	2	2	2	2	4	4	4	29.82	272	272	0	17.466	4	1044600	1044600	3	LIPWVQKPIIF;PWVQKPIIF				119	342;457	True;True	345;460	390;518	472;473;626	473;626			-1
P67871	P67871	1	1	1	Casein kinase II subunit beta	Csnk2b	sp|P67871|CSK2B_MOUSE Casein kinase II subunit beta OS=Mus musculus OX=10090 GN=Csnk2b PE=1 SV=1	1	1	1	1	1	1	1	4.7	4.7	4.7	24.942	215	215	0	8.2356	4.7	299970	299970	1	FGTGFPHMLF				120	128	TRUE	128	147	170	170			-1
P68037	P68037	1	1	1	Ubiquitin-conjugating enzyme E2 L3	Ube2l3	sp|P68037|UB2L3_MOUSE Ubiquitin-conjugating enzyme E2 L3 OS=Mus musculus OX=10090 GN=Ube2l3 PE=1 SV=1	1	1	1	1	1	1	1	8.4	8.4	8.4	17.861	154	154	0	6.8921	8.4	1556200	1556200	1	PAEYPFKPPKITF				121	425	TRUE	428	482	580	580			-1
P68254	P68254	1	1	1	14-3-3 protein theta	Ywhaq	sp|P68254|1433T_MOUSE 14-3-3 protein theta OS=Mus musculus OX=10090 GN=Ywhaq PE=1 SV=1	1	1	1	1	1	1	1	7.3	7.3	7.3	27.778	245	245	0.0055866	5.8994	7.3	1819700	1819700	2	FDISKKEMQPTHPIRLGL				122	112	TRUE	112	126	145;146	146			-1
P68372	P68372	36	36	1	Tubulin beta-4B chain	Tubb4b	sp|P68372|TBB4B_MOUSE Tubulin beta-4B chain OS=Mus musculus OX=10090 GN=Tubb4b PE=1 SV=1	1	36	36	1	36	36	1	45.6	45.6	3.6	49.83	445	445	0	323.31	45.6	304870000	304870000	59	FMPGFAPLTS;FMPGFAPLTSRGSQQ;FQLTHSLGGGTGSGM;FQLTHSLGGGTGSGMG;FQLTHSLGGGTGSGMGTL;FQLTHSLGGGTGSGMGTLL;FSVVPSPKVSD;FSVVPSPKVSDT;HFFMPGF;HFFMPGFAPLTS;HFFMPGFAPLTSRGSQQ;ISKIREEYPDRIMNT;ISKIREEYPDRIMNTF;IVHLQAGQCGNQIG;LRFPGQL;NMVPFPRLHF;NVQNKNSSY;PFPRLHF;PTYGDLNHLVS;QLTHSLGGGTGSGMGTL;RKLAVNMVPFPRLHF;RTLKLTTPTYGDL;RTLKLTTPTYGDLNHLVS;SGVTTCLRFPGQL;TVVEPYNATL;VEWIPNNVKT;VPFPRLHF;VTTCLRFPGQL;VVEPYNATL;WEVIS…				123	150;151;157;158;159;160;185;186;210;212;213;278;279;283;359;417;423;435;452;462;474;477;478;484;519;530;576;591;593;606;609;610;611;666;667;680	True;True;True;True;True;True;True;True;True;True;True;True;True;True;True;True;True;True;True;True;True;True;True;True;True;True;True;True;True;True;True;True;True;True;True;True	150;151;157;158;159;160;161;162;188;189;213;215;216;281;282;286;362;420;426;438;455;465;477;480;481;487;522;533;579;594;596;609;612;613;614;669;670;683	170;171;172;178;179;180;181;182;183;213;214;239;241;242;243;311;312;313;314;318;408;474;480;495;513;523;536;540;541;547;585;596;648;665;667;685;688;689;690;750;751;768;769	195;196;197;198;199;207;208;209;210;211;212;213;214;215;216;217;218;219;256;257;258;259;285;287;288;289;290;371;372;373;374;379;494;495;571;572;578;594;595;620;631;645;649;650;651;657;703;704;718;719;780;781;801;803;804;825;826;829;830;831;896;897;916;917;918	195;198;208;210;213;218;257;258;285;287;288;371;374;379;494;571;578;594;620;631;645;649;651;657;703;718;780;801;804;826;829;830;831;896;897;918	1	147	-1
P70296;Q8VIN1	P70296;Q8VIN1	2;1	2;1	2;1	Phosphatidylethanolamine-binding protein 1;Hippocampal cholinergic neurostimulating peptide;Phosphatidylethanolamine-binding protein 2	Pebp1;Pbp2	sp|P70296|PEBP1_MOUSE Phosphatidylethanolamine-binding protein 1 OS=Mus musculus OX=10090 GN=Pebp1 PE=1 SV=3;sp|Q8VIN1|PEBP2_MOUSE Phosphatidylethanolamine-binding protein 2 OS=Mus musculus OX=10090 GN=Pbp2 PE=1 SV=1	2	2	2	2	2	2	2	9.6	9.6	9.6	20.83	187	187;187	0	14.337	9.6	6832900	6832900	3	ISWDGLDPGKL;VMNRPSSISWDGLDPGKL				124	281;573	True;True	284;576	316;645	376;377;777	376;777			-1;-1
P84086	P84086	3	3	3	Complexin-2	Cplx2	sp|P84086|CPLX2_MOUSE Complexin-2 OS=Mus musculus OX=10090 GN=Cplx2 PE=1 SV=1	1	3	3	3	3	3	3	10.4	10.4	10.4	15.394	134	134	0	29.495	10.4	2999000	2999000	2	DTVLKYLPGPLQD;DTVLKYLPGPLQDM;TVLKYLPGPLQDM				125	85;86;518	True;True;True	85;86;521	96;97;584	114;115;702	114;115;702			-1
P84091	P84091	2	2	2	AP-2 complex subunit mu	Ap2m1	sp|P84091|AP2M1_MOUSE AP-2 complex subunit mu OS=Mus musculus OX=10090 GN=Ap2m1 PE=1 SV=1	1	2	2	2	2	2	2	3	3	3	49.654	435	435	0	11.425	3	2231600	2231600	2	IILPFRVIPL;IILPFRVIPLVRE				126	248;249	True;True	251;252	279;280	333;334	333;334			-1
P97427	P97427	2	1	1	Dihydropyrimidinase-related protein 1	Crmp1	sp|P97427|DPYL1_MOUSE Dihydropyrimidinase-related protein 1 OS=Mus musculus OX=10090 GN=Crmp1 PE=1 SV=1	1	2	1	1	2	1	1	4.7	2.8	2.8	62.167	572	572	0	10.061	4.7	1057200	1057200	1	LIVPGGVKTIE;VTSPPLSPDPTTPDYL				127	344;590	False;True	347;593	392;664	475;800	475;800			-1
P99024	P99024	34	1	1	Tubulin beta-5 chain	Tubb5	sp|P99024|TBB5_MOUSE Tubulin beta-5 chain OS=Mus musculus OX=10090 GN=Tubb5 PE=1 SV=1	1	34	1	1	34	1	1	41.4	3.6	3.6	49.67	444	444	0	15.037	41.4	11869000	11869000	2	FMPGFAPLTS;FMPGFAPLTSRGSQQ;FQLTHSLGGGTGSGM;FQLTHSLGGGTGSGMG;FQLTHSLGGGTGSGMGTL;FQLTHSLGGGTGSGMGTLL;FSVVPSPKVSD;FSVVPSPKVSDT;HFFMPGF;HFFMPGFAPLTS;HFFMPGFAPLTSRGSQQ;ISKIREEYPDRIMNT;ISKIREEYPDRIMNTF;LRFPGQL;NMVPFPRLHF;NVQNKNSSY;PFPRLHF;PTYGDLNHLVS;QLTHSLGGGTGSGMGTL;RKLAVNMVPFPRLHF;RTLKLTTPTYGDL;RTLKLTTPTYGDLNHLVS;SGVTTCLRFPGQL;TVVEPYNATL;VEWIPNNVKT;VPFPRLHF;VTTCLRFPGQL;VVEPYNATL;WEVISDEHGID;WEVISDEH…				128	150;151;157;158;159;160;185;186;210;212;213;278;279;359;417;423;435;452;462;474;477;478;484;519;530;576;591;593;606;609;610;611;666;679	False;False;False;False;False;False;False;False;False;False;False;False;False;False;False;False;False;False;False;False;False;False;False;False;False;False;False;False;False;False;False;False;False;True	150;151;157;158;159;160;161;162;188;189;213;215;216;281;282;362;420;426;438;455;465;477;480;481;487;522;533;579;594;596;609;612;613;614;669;682	170;171;172;178;179;180;181;182;183;213;214;239;241;242;243;311;312;313;314;408;474;480;495;513;523;536;540;541;547;585;596;648;665;667;685;688;689;690;750;766;767	195;196;197;198;199;207;208;209;210;211;212;213;214;215;216;217;218;219;256;257;258;259;285;287;288;289;290;371;372;373;374;494;495;571;572;578;594;595;620;631;645;649;650;651;657;703;704;718;719;780;781;801;803;804;825;826;829;830;831;896;914;915	195;198;208;210;213;218;257;258;285;287;288;371;374;494;571;578;594;620;631;645;649;651;657;703;718;780;801;804;826;829;830;831;896;914	1	147	-1
P99029	P99029	2	2	2	Peroxiredoxin-5, mitochondrial	Prdx5	sp|P99029|PRDX5_MOUSE Peroxiredoxin-5, mitochondrial OS=Mus musculus OX=10090 GN=Prdx5 PE=1 SV=2	1	2	2	2	2	2	2	6.2	6.2	6.2	21.897	210	210	0	12.788	6.2	5729600	5729600	2	APIKVGDAIPSVE;PIKVGDAIPSVE				129	34;441	True;True	34;444	36;501	45;601	45;601			-1
Q00898	Q00898	1	1	1	Alpha-1-antitrypsin 1-5	Serpina1e	sp|Q00898|A1AT5_MOUSE Alpha-1-antitrypsin 1-5 OS=Mus musculus OX=10090 GN=Serpina1e PE=1 SV=1	1	1	1	1	1	1	1	2.2	2.2	2.2	45.891	413	413	0.0053476	5.8385	2.2	248050	248050	1	LSMPPILHF				130	366	TRUE	369	415	503	503			-1
Q01853	Q01853	2	2	2	Transitional endoplasmic reticulum ATPase	Vcp	sp|Q01853|TERA_MOUSE Transitional endoplasmic reticulum ATPase OS=Mus musculus OX=10090 GN=Vcp PE=1 SV=4	1	2	2	2	2	2	2	2.7	2.7	2.7	89.321	806	806	0	11.197	2.7	1654100	1654100	2	IIGATNRPDIID;VELPLRHPAL				131	245;528	True;True	248;531	276;594	330;716	330;716			-1
Q02053;P31254	Q02053;P31254	2;1	2;1	2;1	Ubiquitin-like modifier-activating enzyme 1;Ubiquitin-like modifier-activating enzyme 1 Y	Uba1;Uba1y	sp|Q02053|UBA1_MOUSE Ubiquitin-like modifier-activating enzyme 1 OS=Mus musculus OX=10090 GN=Uba1 PE=1 SV=1;sp|P31254|UBA1Y_MOUSE Ubiquitin-like modifier-activating enzyme 1 Y OS=Mus musculus OX=10090 GN=Uba1y PE=1 SV=2	2	2	2	2	2	2	2	1.7	1.7	1.7	117.81	1058	1058;1058	0	13.356	1.7	1225100	1225100	2	FRPWDVTKL;IKVLGPYTF				132	173;260	True;True	176;263	199;291	238;348	238;348			-1;-1
Q03265	Q03265	4	4	4	ATP synthase subunit alpha, mitochondrial	Atp5a1	sp|Q03265|ATPA_MOUSE ATP synthase subunit alpha, mitochondrial OS=Mus musculus OX=10090 GN=Atp5f1a PE=1 SV=1	1	4	4	4	4	4	4	8.5	8.5	8.5	59.752	553	553	0	23.751	8.5	15446000	15446000	4	FYKGIRPAIN;LRRPPGREAYPGDVF;VVVFGNDKL;YLDKLEPSKITKF				133	196;362;598;656	True;True;True;True	199;365;601;659	224;411;673;740	269;499;810;886	269;499;810;886			-1
Q04447;P07310;Q6P8J7	Q04447	18;2;2	18;2;2	16;0;0	Creatine kinase B-type	Ckb	sp|Q04447|KCRB_MOUSE Creatine kinase B-type OS=Mus musculus OX=10090 GN=Ckb PE=1 SV=1	3	18	18	16	18	18	16	31	31	28.3	42.713	381	381;381;419	0	183.06	31	76143000	76143000	25	AIQTGVDNPGHPYIM;AIQTGVDNPGHPYIMT;ARDWPDARGIWHNDNKTF;ARDWPDARGIWHNDNKTFL;DAIQTGVDNPGHPYIM;FDKPVSPLL;HKTDLNPDNLQGGDDLDPNY;HKTDLNPDNLQGGDDLDPNYVL;IKLPHLGKHEKFSEVL;IQTGVDNPGHPYIM;IQTGVDNPGHPYIMT;LFDKPVSPLL;MARDWPDARGIWHNDNKTFL;MWNPHLGY;MWNPHLGYIL;PDLSSHNNHMAKVLTPEL;RAGVHIKLPHLGKHEKFSEVL;RGIWHNDNKTFL				134	26;27;38;39;64;114;214;215;254;268;269;328;385;403;404;430;468;472	True;True;True;True;True;True;True;True;True;True;True;True;True;True;True;True;True;True	26;27;38;39;64;114;217;218;257;271;272;331;388;406;407;433;471;475	26;27;40;41;73;128;244;245;285;300;301;375;437;457;458;488;530;534	31;32;33;34;50;51;87;148;149;291;292;339;340;358;359;360;361;453;454;528;550;551;552;586;638;643	32;33;50;51;87;148;291;292;340;358;361;454;528;551;552;586;638;643			-1;-1;-1
Q05816	Q05816	1	1	1	Fatty acid-binding protein, epidermal	Fabp5	sp|Q05816|FABP5_MOUSE Fatty acid-binding protein 5 OS=Mus musculus OX=10090 GN=Fabp5 PE=1 SV=3	1	1	1	1	1	1	1	8.9	8.9	8.9	15.137	135	135	0	7.5632	8.9	0	0	0	ASLKDLEGKWRL				135	44	TRUE	44	47	57	57			-1
Q05920	Q05920	1	1	1	Pyruvate carboxylase, mitochondrial	Pc	sp|Q05920|PYC_MOUSE Pyruvate carboxylase, mitochondrial OS=Mus musculus OX=10090 GN=Pc PE=1 SV=1	1	1	1	1	1	1	1	1	1	1	129.68	1178	1178	0.0090909	5.5288	1	161960	161960	1	RELIPNIPFQML				136	471	TRUE	474	533	642	642			-1
Q06185	Q06185	1	1	1	ATP synthase subunit e, mitochondrial	Atp5i	sp|Q06185|ATP5I_MOUSE ATP synthase subunit e, mitochondrial OS=Mus musculus OX=10090 GN=Atp5me PE=1 SV=2	1	1	1	1	1	1	1	16.9	16.9	16.9	8.2355	71	71	0	8.8531	16.9	1875900	1875900	1	VPPVQVSPLIKF				137	578	TRUE	581	650	784	784			-1
Q11011	Q11011	1	1	1	Puromycin-sensitive aminopeptidase	Npepps	sp|Q11011|PSA_MOUSE Puromycin-sensitive aminopeptidase OS=Mus musculus OX=10090 GN=Npepps PE=1 SV=2	1	1	1	1	1	1	1	1.3	1.3	1.3	103.32	920	920	0	9.5654	1.3	601690	601690	1	FNVPYPLPKIDL				138	155	TRUE	155	176	204	204			-1
Q3UHJ0	Q3UHJ0	1	1	1	AP2-associated protein kinase 1	Aak1	sp|Q3UHJ0|AAK1_MOUSE AP2-associated protein kinase 1 OS=Mus musculus OX=10090 GN=Aak1 PE=1 SV=2	1	1	1	1	1	1	1	1.5	1.5	1.5	103.35	959	959	0.0052632	5.7947	1.5	226970	226970	1	PFIPLQVPDAPEKL				139	434	TRUE	437	494	593	593			-1
Q3UIU2	Q3UIU2	1	1	1	NADH dehydrogenase [ubiquinone] 1 beta subcomplex subunit 6	Ndufb6	sp|Q3UIU2|NDUB6_MOUSE NADH dehydrogenase [ubiquinone] 1 beta subcomplex subunit 6 OS=Mus musculus OX=10090 GN=Ndufb6 PE=1 SV=3	1	1	1	1	1	1	1	10.9	10.9	10.9	15.515	128	128	0	7.0571	10.9	1769900	1769900	1	PVLPPRRMWPLERF				140	456	TRUE	459	517	625	625			-1
Q3UX10	Q3UX10	7	2	2	Tubulin alpha chain-like 3	Tubal3	sp|Q3UX10|TBAL3_MOUSE Tubulin alpha chain-like 3 OS=Mus musculus OX=10090 GN=Tubal3 PE=2 SV=2	1	7	2	2	7	2	2	6.5	4	4	49.988	446	446	0	12.222	6.5	741420	741420	2	DHKFDLM;FQTNLVPYPRIHF;FQTNLVPYPRIHFPITAL;QTNLVPYPRIHF;VPYPRIHF;VPYPRIHFPITAL;WARLDHKFDLM				141	68;162;163;465;580;581;604	False;False;True;False;False;True;False	68;165;166;468;583;584;607	78;186;187;188;526;652;653;680;681;682	92;222;223;224;225;634;786;787;819;820;821;822	92;224;225;634;786;787;820			-1
Q5FWK3	Q5FWK3	1	1	1	Rho GTPase-activating protein 1	Arhgap1	sp|Q5FWK3|RHG01_MOUSE Rho GTPase-activating protein 1 OS=Mus musculus OX=10090 GN=Arhgap1 PE=1 SV=1	1	1	1	1	1	1	1	2.3	2.3	2.3	50.41	439	439	0	6.0025	2.3	308080	308080	1	FDLYPHVVGF				142	115	TRUE	115	129	150	150			-1
Q5M8N4	Q5M8N4	1	1	1	Epimerase family protein SDR39U1	Sdr39u1	sp|Q5M8N4|D39U1_MOUSE Epimerase family protein SDR39U1 OS=Mus musculus OX=10090 GN=Sdr39u1 PE=1 SV=2	1	1	1	1	1	1	1	5.8	5.8	5.8	31.458	293	293	0.0047619	5.5842	5.8	254300	254300	1	PFRLGLGGPIGSGRQFF				143	436	TRUE	439	496	596	596			-1
Q7TMB8;Q5SQX6	Q7TMB8;Q5SQX6	1;1	1;1	1;1	Cytoplasmic FMR1-interacting protein 1;Cytoplasmic FMR1-interacting protein 2	Cyfip1;Cyfip2	sp|Q7TMB8|CYFP1_MOUSE Cytoplasmic FMR1-interacting protein 1 OS=Mus musculus OX=10090 GN=Cyfip1 PE=1 SV=1;sp|Q5SQX6|CYFP2_MOUSE Cytoplasmic FMR1-interacting protein 2 OS=Mus musculus OX=10090 GN=Cyfip2 PE=1 SV=2	2	1	1	1	1	1	1	0.8	0.8	0.8	145.24	1253	1253;1253	0.0052356	5.7831	0.8	428760	428760	1	FKQLQVVPLF				144	142	TRUE	142	161	185	185			-1;-1
Q60597	Q60597	1	1	1	2-oxoglutarate dehydrogenase, mitochondrial	Ogdh	sp|Q60597|ODO1_MOUSE 2-oxoglutarate dehydrogenase complex component E1 OS=Mus musculus OX=10090 GN=Ogdh PE=1 SV=3	1	1	1	1	1	1	1	1	1	1	116.45	1023	1023	0	6.215	1	118560	118560	0	EQLSPFPFDL				145	103	TRUE	103	116	134	134			-1
Q60864	Q60864	1	1	1	Stress-induced-phosphoprotein 1	Stip1	sp|Q60864|STIP1_MOUSE Stress-induced-phosphoprotein 1 OS=Mus musculus OX=10090 GN=Stip1 PE=1 SV=1	1	1	1	1	1	1	1	2.6	2.6	2.6	62.581	543	543	0.0055556	5.8929	2.6	1534300	1534300	1	AERKFMNPFNLPNL				146	17	TRUE	17	17	21	21			-1
Q60902	Q60902	1	1	1	Epidermal growth factor receptor substrate 15-like 1	Eps15l1	sp|Q60902|EP15R_MOUSE Epidermal growth factor receptor substrate 15-like 1 OS=Mus musculus OX=10090 GN=Eps15l1 PE=1 SV=3	1	1	1	1	1	1	1	2	2	2	99.307	907	907	0.0089686	5.5083	2	0	0	0	AAPLVPLSQQIPGGNPLY				147	7	TRUE	7	7	9	9			-1
Q61171	Q61171	1	1	1	Peroxiredoxin-2	Prdx2	sp|Q61171|PRDX2_MOUSE Peroxiredoxin-2 OS=Mus musculus OX=10090 GN=Prdx2 PE=1 SV=3	1	1	1	1	1	1	1	10.1	10.1	10.1	21.778	198	198	0	8.2831	10.1	4290400	4290400	1	AWINTPRKEGGLGPLNIPLL				148	60	TRUE	60	69	82	82			-1
Q61290	Q61290	1	1	1	Voltage-dependent R-type calcium channel subunit alpha-1E	Cacna1e	sp|Q61290|CAC1E_MOUSE Voltage-dependent R-type calcium channel subunit alpha-1E OS=Mus musculus OX=10090 GN=Cacna1e PE=1 SV=1	1	1	1	1	1	1	1	1.3	1.3	1.3	257.23	2272	2272	0	6.2506	1.3	93609	93609	1	NKEEAPPMNPLNPLNPLSPLNPLNAHPSL				149	414	TRUE	417	470	567	567			-1
Q61644	Q61644	1	1	1	Protein kinase C and casein kinase substrate in neurons protein 1	Pacsin1	sp|Q61644|PACN1_MOUSE Protein kinase C and casein kinase substrate in neurons protein 1 OS=Mus musculus OX=10090 GN=Pacsin1 PE=1 SV=1	1	1	1	1	1	1	1	3.6	3.6	3.6	50.575	441	441	0	14.358	3.6	1188500	1188500	1	FRSTSGPGMPMNWPQF				150	174	TRUE	177	200	239	239			-1
Q61937	Q61937	1	1	1	Nucleophosmin	Npm1	sp|Q61937|NPM_MOUSE Nucleophosmin OS=Mus musculus OX=10090 GN=Npm1 PE=1 SV=1	1	1	1	1	1	1	1	4.1	4.1	4.1	32.56	292	292	0	8.5338	4.1	610120	610120	0	MDMSPLRPQNYL				151	387	TRUE	390	439	531	531			-1
Q62277	Q62277	4	4	4	Synaptophysin	Syp	sp|Q62277|SYPH_MOUSE Synaptophysin OS=Mus musculus OX=10090 GN=Syp PE=1 SV=2	1	4	4	4	4	4	4	12.7	12.7	12.7	34.024	314	314	0	25.423	12.7	16509000	16509000	7	AAPFMRAPPGAPEKQPAPGDA;FEYPFRLHQ;FEYPFRLHQVY;VKVLQWVF				152	6;122;123;567	True;True;True;True	6;122;123;570	6;139;140;141;142;637	7;8;162;163;164;165;769	8;163;165;769			-1
Q64332	Q64332	2	1	1	Synapsin-2	Syn2	sp|Q64332|SYN2_MOUSE Synapsin-2 OS=Mus musculus OX=10090 GN=Syn2 PE=1 SV=2	1	2	1	1	2	1	1	7	5.8	5.8	63.372	586	586	0	18.22	7	1544000	1544000	2	ATSAASPGPERRPPPAQAPAPQPAPQPAPTPSVG;CDKPWVF				153	52;61	True;False	52;61	59;60;70	70;71;83	70;83			-1
Q64433	Q64433	2	2	2	10 kDa heat shock protein, mitochondrial	Hspe1	sp|Q64433|CH10_MOUSE 10 kDa heat shock protein, mitochondrial OS=Mus musculus OX=10090 GN=Hspe1 PE=1 SV=2	1	2	2	2	2	2	2	17.6	17.6	17.6	10.963	102	102	0	10.885	17.6	4875900	4875900	2	FRKFLPLF;PEYGGTKVVL				154	169;433	True;True	172;436	195;493	234;592	234;592			-1
Q64518	Q64518	1	1	1	Sarcoplasmic/endoplasmic reticulum calcium ATPase 3	Atp2a3	sp|Q64518|AT2A3_MOUSE Sarcoplasmic/endoplasmic reticulum calcium ATPase 3 OS=Mus musculus OX=10090 GN=Atp2a3 PE=1 SV=4	1	1	1	1	1	1	1	1.1	1.1	1.1	109.53	999	999	0.009009	5.5124	1.1	0	0	1	LRMPPWLNPWL				155	361	TRUE	364	410	498	498			-1
Q64521	Q64521	1	1	1	Glycerol-3-phosphate dehydrogenase, mitochondrial	Gpd2	sp|Q64521|GPDM_MOUSE Glycerol-3-phosphate dehydrogenase, mitochondrial OS=Mus musculus OX=10090 GN=Gpd2 PE=1 SV=2	1	1	1	1	1	1	1	1.9	1.9	1.9	80.953	727	727	0	20.621	1.9	857080	857080	2	LEIAPHLSAPLPIM				156	321	TRUE	324	367	443;444	443			-1
Q68FD5	Q68FD5	6	6	6	Clathrin heavy chain 1	Cltc	sp|Q68FD5|CLH1_MOUSE Clathrin heavy chain 1 OS=Mus musculus OX=10090 GN=Cltc PE=1 SV=3	1	6	6	6	6	6	6	2.7	2.7	2.7	191.55	1675	1675	0	39.517	2.7	14638000	14638000	8	DLLRPDVVL;FSKVKQLPLVKPYL;FWSRVNIPKVL;FWSRVNIPKVLRA;NIIPYITNV;WSRVNIPKVL				157	70;181;194;195;412;626	True;True;True;True;True;True	70;184;197;198;415;629	80;208;209;222;223;468;707	94;250;251;252;267;268;564;850	94;250;267;268;564;850			-1
Q6PE13	Q6PE13	1	1	1	Proline-rich transmembrane protein 3	Prrt3	sp|Q6PE13|PRRT3_MOUSE Proline-rich transmembrane protein 3 OS=Mus musculus OX=10090 GN=Prrt3 PE=1 SV=1	1	1	1	1	1	1	1	1.6	1.6	1.6	101.22	971	971	0.0050761	5.6698	1.6	331050	331050	1	LGLGAGLPQPLQKPLL				158	332	TRUE	335	379	459	459			-1
Q6PIC6;Q9WV27;Q9Z1W8	Q6PIC6	15;4;1	15;4;1	6;0;0	Sodium/potassium-transporting ATPase subunit alpha-3	Atp1a3	sp|Q6PIC6|AT1A3_MOUSE Sodium/potassium-transporting ATPase subunit alpha-3 OS=Mus musculus OX=10090 GN=Atp1a3 PE=1 SV=1	3	15	15	6	15	15	6	14.1	14.1	5.2	111.69	1013	1013;1032;1035	0	129.39	14.1	59351000	59351000	17	ARDGPNALTPPPTTPEW;CRQLFGGF;IIVANVPEGLL;IMANIPLPLGT;IPFNSTNKYQL;LELGGLGE;SFKNMVPQQAL;TSNIPEITPFL;VALSHIAGL;VEIKGGDRVPADL;VVVATGDRTVM;WFDNQIHE;WFDNQIHEADTTE;YPLKPSWW;YPLKPSWWF				159	37;63;251;264;267;324;482;515;522;526;597;612;613;661;662	True;True;True;True;True;True;True;True;True;True;True;True;True;True;True	37;63;254;267;270;327;485;518;525;529;600;615;616;664;665	39;72;282;296;299;371;545;580;588;592;672;691;692;745;746	48;49;85;86;336;354;357;449;655;697;708;709;713;714;809;832;833;891;892	49;86;336;354;357;449;655;697;709;714;809;832;833;891;892			-1;-1;-1
Q6PIE5	Q6PIE5	12	2	2	Sodium/potassium-transporting ATPase subunit alpha-2	Atp1a2	sp|Q6PIE5|AT1A2_MOUSE Sodium/potassium-transporting ATPase subunit alpha-2 OS=Mus musculus OX=10090 GN=Atp1a2 PE=1 SV=1	1	12	2	2	12	2	2	11	1.8	1.8	112.22	1020	1020	0	12.784	11	5045700	5045700	2	AENGFLPSRL;ARDGPNALTPPPTTPEW;CRQLFGGF;FIIANIPLPLGT;IIANIPLPLGT;IIVANVPEGLL;IPFNSTNKYQL;SFKNMVPQQAL;TSNIPEITPFL;WFDNQIHE;WFDNQIHEADTTE;YPLKVTWW				160	16;37;63;132;242;251;267;482;515;612;613;663	True;False;False;False;False;False;False;False;False;False;False;True	16;37;63;132;245;254;270;485;518;615;616;666	16;39;72;151;273;282;299;545;580;691;692;747	20;48;49;85;86;174;325;326;336;357;655;697;832;833;893	20;49;86;174;325;336;357;655;697;832;833;893			-1
Q6ZQ38	Q6ZQ38	1	1	1	Cullin-associated NEDD8-dissociated protein 1	Cand1	sp|Q6ZQ38|CAND1_MOUSE Cullin-associated NEDD8-dissociated protein 1 OS=Mus musculus OX=10090 GN=Cand1 PE=1 SV=2	1	1	1	1	1	1	1	1.1	1.1	1.1	136.33	1230	1230	0.0052083	5.7378	1.1	179530	179530	1	TQHIPVLVPGIIF				161	513	TRUE	516	578	694	694			-1
Q7TMM9;Q9CWF2	Q7TMM9;Q9CWF2	35;33	6;4	4;2	Tubulin beta-2A chain;Tubulin beta-2B chain	Tubb2a;Tubb2b	sp|Q7TMM9|TBB2A_MOUSE Tubulin beta-2A chain OS=Mus musculus OX=10090 GN=Tubb2a PE=1 SV=1;sp|Q9CWF2|TBB2B_MOUSE Tubulin beta-2B chain OS=Mus musculus OX=10090 GN=Tubb2b PE=1 SV=1	2	35	6	4	35	6	4	42.5	11.7	9	49.906	445	445;445	0	79.166	42.5	22379000	22379000	8	AAGNKYVPRAIL;FMPGFAPLTS;FMPGFAPLTSRGSQQ;FQLTHSLGGGTGSGM;FQLTHSLGGGTGSGMG;FQLTHSLGGGTGSGMGTL;FQLTHSLGGGTGSGMGTLL;FSVMPSPKVSD;FSVMPSPKVSDT;HFFMPGF;HFFMPGFAPLTS;HFFMPGFAPLTSRGSQQ;ISKIREEYPDRIMNT;ISKIREEYPDRIMNTF;LRFPGQL;NMVPFPRLHF;NVQNKNSSY;PFPRLHF;PTYGDLNHLVS;QLTHSLGGGTGSGMGTL;RKLAVNMVPFPRLHF;RTLKLTTPTYGDL;RTLKLTTPTYGDLNHLVS;SGVTTCLRFPGQL;TVVEPYNATL;VEWIPNNVKT;VPFPRLHF;VTTCLRFPGQL;VVEPYNATL;WEVISDE…				162	3;150;151;157;158;159;160;183;184;210;212;213;278;279;359;417;423;435;452;462;474;477;478;484;519;530;576;591;593;606;607;608;666;667;677	True;False;False;False;False;False;False;True;True;False;False;False;False;False;False;False;False;False;False;False;False;False;False;False;False;False;False;False;False;False;True;True;False;False;True	3;150;151;157;158;159;160;161;162;186;187;213;215;216;281;282;362;420;426;438;455;465;477;480;481;487;522;533;579;594;596;609;610;611;669;670;680	3;170;171;172;178;179;180;181;182;183;211;212;239;241;242;243;311;312;313;314;408;474;480;495;513;523;536;540;541;547;585;596;648;665;667;685;686;687;750;751;761;762	4;195;196;197;198;199;207;208;209;210;211;212;213;214;215;216;217;218;219;254;255;285;287;288;289;290;371;372;373;374;494;495;571;572;578;594;595;620;631;645;649;650;651;657;703;704;718;719;780;781;801;803;804;825;826;827;828;896;897;908;909;910	4;195;198;208;210;213;218;254;255;285;287;288;371;374;494;571;578;594;620;631;645;649;651;657;703;718;780;801;804;826;827;828;896;897;910	1	147	-1;-1
Q7TSJ2	Q7TSJ2	1	1	1	Microtubule-associated protein 6	Map6	sp|Q7TSJ2|MAP6_MOUSE Microtubule-associated protein 6 OS=Mus musculus OX=10090 GN=Map6 PE=1 SV=2	1	1	1	1	1	1	1	4.3	4.3	4.3	96.449	906	906	0	8.5688	4.3	1497200	1497200	1	PIIPVPLKGQDPLVPAPTKDQGPTAPDPLKTQGPKGTQL				163	439	TRUE	442	499	599	599			-1
Q80TJ1	Q80TJ1	1	1	1	Calcium-dependent secretion activator 1	Cadps	sp|Q80TJ1|CAPS1_MOUSE Calcium-dependent secretion activator 1 OS=Mus musculus OX=10090 GN=Cadps PE=1 SV=3	1	1	1	1	1	1	1	1.3	1.3	1.3	153.11	1355	1355	0	10.127	1.3	312480	312480	1	PKVPNLPVNIPLGIPQM				164	443	TRUE	446	503	603	603			-1
Q80TL0	Q80TL0	1	1	1	Protein phosphatase 1E	Ppm1e	sp|Q80TL0|PPM1E_MOUSE Protein phosphatase 1E OS=Mus musculus OX=10090 GN=Ppm1e PE=1 SV=2	1	1	1	1	1	1	1	3.9	3.9	3.9	83.418	749	749	0.005291	5.8014	3.9	345680	345680	1	AAAPGHSAVPPPPQPQLPPLPPLPRPLSE				165	0	TRUE	0	0	0	0			-1
Q8BG39	Q8BG39	1	1	1	Synaptic vesicle glycoprotein 2B	Sv2b	sp|Q8BG39|SV2B_MOUSE Synaptic vesicle glycoprotein 2B OS=Mus musculus OX=10090 GN=Sv2b PE=1 SV=1	1	1	1	1	1	1	1	1.5	1.5	1.5	77.456	683	683	0	6.386	1.5	1546200	1546200	1	VGITKVVPIL				166	547	TRUE	550	617	743	743			-1
Q8BH59	Q8BH59	1	1	1	Calcium-binding mitochondrial carrier protein Aralar1	Slc25a12	sp|Q8BH59|S2512_MOUSE Electrogenic aspartate/glutamate antiporter SLC25A12, mitochondrial OS=Mus musculus OX=10090 GN=Slc25a12 PE=1 SV=1	1	1	1	1	1	1	1	3	3	3	74.569	677	677	0.0048077	5.5942	3	528980	528980	1	AGIENKFGLYLPKFKSPSVA				167	21	TRUE	21	21	25	25			-1
Q8BJI1	Q8BJI1	1	1	1	Sodium-dependent neutral amino acid transporter SLC6A17	Slc6a17	sp|Q8BJI1|S6A17_MOUSE Sodium-dependent neutral amino acid transporter SLC6A17 OS=Mus musculus OX=10090 GN=Slc6a17 PE=1 SV=1	1	1	1	1	1	1	1	1.4	1.4	1.4	81.07	727	727	0	6.1697	1.4	89708	89708	1	VATLPIPVVF				168	523	TRUE	526	589	710	710			-1
Q8BMF4	Q8BMF4	1	1	1	Dihydrolipoyllysine-residue acetyltransferase component of pyruvate dehydrogenase complex, mitochondrial	Dlat	sp|Q8BMF4|ODP2_MOUSE Dihydrolipoyllysine-residue acetyltransferase component of pyruvate dehydrogenase complex, mitochondrial OS=Mus musculus OX=10090 GN=Dlat PE=1 SV=2	1	1	1	1	1	1	1	2.8	2.8	2.8	67.941	642	642	0	8.4057	2.8	1489200	1489200	1	AAMAPPGPRVAPAPAGVF				169	5	TRUE	5	5	6	6			-1
Q8BW75	Q8BW75	1	1	1	Amine oxidase [flavin-containing] B	Maob	sp|Q8BW75|AOFB_MOUSE Amine oxidase [flavin-containing] B OS=Mus musculus OX=10090 GN=Maob PE=1 SV=4	1	1	1	1	1	1	1	2.9	2.9	2.9	58.557	520	520	0	7.3407	2.9	172580	172580	1	AFRGPFPPVWNPITY				170	19	TRUE	19	19	23	23			-1
Q8BWF0	Q8BWF0	3	3	3	Succinate-semialdehyde dehydrogenase, mitochondrial	Aldh5a1	sp|Q8BWF0|SSDH_MOUSE Succinate-semialdehyde dehydrogenase, mitochondrial OS=Mus musculus OX=10090 GN=Aldh5a1 PE=1 SV=1	1	3	3	3	3	3	3	3.8	3.8	3.8	55.968	523	523	0	18.694	3.8	1737800	1737800	2	AIITPWNF;IITPWNF;VGGRWLPAPATF				171	25;250;541	True;True;True	25;253;544	25;281;611	30;335;736	30;335;736			-1
Q8CI94	Q8CI94	1	1	1	Glycogen phosphorylase, brain form	Pygb	sp|Q8CI94|PYGB_MOUSE Glycogen phosphorylase, brain form OS=Mus musculus OX=10090 GN=Pygb PE=1 SV=3	1	1	1	1	1	1	1	2.6	2.6	2.6	96.729	843	843	0	7.7014	2.6	3918600	3918600	1	YELEPEKFQNKTNGITPRRWLL				172	641	TRUE	644	724;725	868;869	868			-1
Q8K0T0	Q8K0T0	3	3	3	Reticulon-1	Rtn1	sp|Q8K0T0|RTN1_MOUSE Reticulon-1 OS=Mus musculus OX=10090 GN=Rtn1 PE=1 SV=1	1	3	3	3	3	3	3	2.3	2.3	2.3	83.571	780	780	0	17.726	2.3	132880	132880	3	GLMPPLPFF;LMPPLPFF;TEIPGPLGSGLMPPLPF				173	202;354;502	True;True;True	205;357;505	230;403;566	276;487;681	276;487;681			-1
Q8K2C9	Q8K2C9	1	1	1	Very-long-chain (3R)-3-hydroxyacyl-CoA dehydratase 3	Hacd3	sp|Q8K2C9|HACD3_MOUSE Very-long-chain (3R)-3-hydroxyacyl-CoA dehydratase 3 OS=Mus musculus OX=10090 GN=Hacd3 PE=1 SV=2	1	1	1	1	1	1	1	2.8	2.8	2.8	43.131	362	362	0	8.0948	2.8	702650	702650	1	SFTLPYPVKM				174	483	TRUE	486	546	656	656			-1
Q8QZT1	Q8QZT1	1	1	1	Acetyl-CoA acetyltransferase, mitochondrial	Acat1	sp|Q8QZT1|THIL_MOUSE Acetyl-CoA acetyltransferase, mitochondrial OS=Mus musculus OX=10090 GN=Acat1 PE=1 SV=1	1	1	1	1	1	1	1	2.8	2.8	2.8	44.816	424	424	0	6.7694	2.8	2612400	2612400	1	PLAPAYAVPKVL				175	445	TRUE	448	505	605	605			-1
Q8R0Y6	Q8R0Y6	1	1	1	Cytosolic 10-formyltetrahydrofolate dehydrogenase	Aldh1l1	sp|Q8R0Y6|AL1L1_MOUSE Cytosolic 10-formyltetrahydrofolate dehydrogenase OS=Mus musculus OX=10090 GN=Aldh1l1 PE=1 SV=1	1	1	1	1	1	1	1	1.1	1.1	1.1	98.708	902	902	0.0092166	5.551	1.1	107700	107700	1	IVIPWNYPLM				176	285	TRUE	288	321	382	382			-1
Q8R404	Q8R404	1	1	1	Protein QIL1	Qil1	sp|Q8R404|MIC13_MOUSE MICOS complex subunit MIC13 OS=Mus musculus OX=10090 GN=Micos13 PE=1 SV=1	1	1	1	1	1	1	1	11.8	11.8	11.8	13.373	119	119	0	7.2563	11.8	3016200	3016200	2	PQLPTPPKIKFPNF				177	447	TRUE	450	507	607;608	607			-1
Q8VDN2	Q8VDN2	14	5	3	Sodium/potassium-transporting ATPase subunit alpha-1	Atp1a1	sp|Q8VDN2|AT1A1_MOUSE Sodium/potassium-transporting ATPase subunit alpha-1 OS=Mus musculus OX=10090 GN=Atp1a1 PE=1 SV=1	1	14	5	3	14	5	3	11.3	3.6	2.4	112.98	1023	1023	0	50.081	11.3	13469000	13469000	7	AENGFLPFHL;AENGFLPFHLLG;ARDGPNALTPPPTTPEW;CRQLFGGF;FIIANIPLPLGT;IIANIPLPLGT;IIVANVPEGLL;IPFNSTNKYQL;LELGGLGE;SFKNMVPQQAL;TSNIPEITPFL;VEIPFNSTNKYQL;WFDNQIHE;WFDNQIHEADTTE				178	14;15;37;63;132;242;251;267;324;482;515;527;612;613	True;True;False;False;True;True;False;False;False;False;False;True;False;False	14;15;37;63;132;245;254;270;327;485;518;530;615;616	14;15;39;72;151;273;282;299;371;545;580;593;691;692	17;18;19;48;49;85;86;174;325;326;336;357;449;655;697;715;832;833	17;18;49;86;174;325;336;357;449;655;697;715;832;833			-1
Q8VEM8	Q8VEM8	4	4	4	Phosphate carrier protein, mitochondrial	Slc25a3	sp|Q8VEM8|MPCP_MOUSE Phosphate carrier protein, mitochondrial OS=Mus musculus OX=10090 GN=Slc25a3 PE=1 SV=1	1	4	4	4	4	4	4	13.4	13.4	13.4	39.632	357	357	0	23.288	13.4	7643400	7643400	4	FRLPRPPPPEM;FRLPRPPPPEMPESLKKKLGLTE;FYKGVAPLW;KEDGVRGLAKGWAPTL				179	171;172;197;295	True;True;True;True	174;175;200;298	197;198;225;334	236;237;270;395	236;237;270;395			-1
Q91V12	Q91V12	1	1	1	Cytosolic acyl coenzyme A thioester hydrolase	Acot7	sp|Q91V12|BACH_MOUSE Cytosolic acyl coenzyme A thioester hydrolase OS=Mus musculus OX=10090 GN=Acot7 PE=1 SV=2	1	1	1	1	1	1	1	1.8	1.8	1.8	42.536	381	381	0.0049505	5.6405	1.8	208150	208150	1	WYVPLSL				180	633	TRUE	636	714	857	857			-1
Q91WC3	Q91WC3	1	1	1	Long-chain-fatty-acid--CoA ligase 6	Acsl6	sp|Q91WC3|ACSL6_MOUSE Long-chain-fatty-acid--CoA ligase 6 OS=Mus musculus OX=10090 GN=Acsl6 PE=1 SV=1	1	1	1	1	1	1	1	2.3	2.3	2.3	78.016	697	697	0.005	5.6505	2.3	402150	402150	1	WLHTGDIGKWLPEGTL				181	619	TRUE	622	700	842	842			-1
Q91XV3	Q91XV3	1	1	1	Brain acid soluble protein 1	Basp1	sp|Q91XV3|BASP1_MOUSE Brain acid soluble protein 1 OS=Mus musculus OX=10090 GN=Basp1 PE=1 SV=3	1	1	1	1	1	1	1	9.7	9.7	9.7	22.086	226	226	0	15.375	9.7	1784800	1784800	1	AAKAPAPAAPAAAEPQAEAPAA				182	4	TRUE	4	4	5	5			-1
Q91ZZ3	Q91ZZ3	1	1	1	Beta-synuclein	Sncb	sp|Q91ZZ3|SYUB_MOUSE Beta-synuclein OS=Mus musculus OX=10090 GN=Sncb PE=1 SV=1	1	1	1	1	1	1	1	8.3	8.3	8.3	14.051	133	133	0.0053191	5.8296	8.3	703120	703120	1	AAEKTKQGVTE				183	2	TRUE	2	2	3	3			-1
Q922F4;A2AQ07	Q922F4	32;11	9;2	5;0	Tubulin beta-6 chain	Tubb6	sp|Q922F4|TBB6_MOUSE Tubulin beta-6 chain OS=Mus musculus OX=10090 GN=Tubb6 PE=1 SV=1	2	32	9	5	32	9	5	33.8	8.9	3.8	50.09	447	447;451	0	83.667	33.8	40970000	40970000	11	DSVRSGPFGQL;DSVRSGPFGQLF;DSVRSGPFGQLFRPDN;DSVRSGPFGQLFRPDNF;FMPGFAPLTA;FQLTHSLGGGTGSGM;FQLTHSLGGGTGSGMG;FQLTHSLGGGTGSGMGTL;FQLTHSLGGGTGSGMGTLL;FSVMPSPKVSD;FSVMPSPKVSDT;HFFMPGF;HFFMPGFAPLTA;ISKIREEYPDRIMNT;ISKIREEYPDRIMNTF;LFRPDNF;LRFPGQL;NMVPFPRLHF;PFPRLHF;PTYGDLNHLVS;QLTHSLGGGTGSGMGTL;RKLAVNMVPFPRLHF;RTLKLTTPTYGDL;RTLKLTTPTYGDLNHLVS;SVRSGPFGQLFRPDNF;TVVEPYNATL;VPFPRLHF;VTTSLRFPGQL;VVEPYNATL;WEVI…				184	77;78;79;80;149;157;158;159;160;183;184;210;211;278;279;329;359;417;435;452;462;474;477;478;495;519;576;592;593;606;666;667	True;True;True;True;True;False;False;False;False;False;False;False;True;False;False;True;False;False;False;False;False;False;False;False;True;False;False;True;False;False;False;False	77;78;79;80;149;157;158;159;160;161;162;186;187;213;214;281;282;332;362;420;438;455;465;477;480;481;498;522;579;595;596;609;669;670	87;88;89;90;91;169;178;179;180;181;182;183;211;212;239;240;311;312;313;314;376;408;474;495;513;523;536;540;541;558;585;648;666;667;685;750;751	103;104;105;106;107;108;109;194;207;208;209;210;211;212;213;214;215;216;217;218;219;254;255;285;286;371;372;373;374;455;494;495;571;572;594;595;620;631;645;649;650;651;671;703;704;780;781;802;803;804;825;826;896;897	103;104;107;109;194;208;210;213;218;254;255;285;286;371;374;455;494;571;594;620;631;645;649;651;671;703;780;802;804;826;896;897	1	147	-1;-1
Q99104	Q99104	1	1	1	Unconventional myosin-Va	Myo5a	sp|Q99104|MYO5A_MOUSE Unconventional myosin-Va OS=Mus musculus OX=10090 GN=Myo5a PE=1 SV=2	1	1	1	1	1	1	1	0.4	0.4	0.4	215.54	1853	1853	0	7.0501	0.4	0	0	1	FKFPFTF				185	140	TRUE	140	159	183	183			-1
Q99KI0	Q99KI0	8	8	8	Aconitate hydratase, mitochondrial	Aco2	sp|Q99KI0|ACON_MOUSE Aconitate hydratase, mitochondrial OS=Mus musculus OX=10090 GN=Aco2 PE=1 SV=1	1	8	8	8	8	8	8	12.4	12.4	12.4	85.462	780	780	0	63.326	12.4	15610000	15610000	10	FGPVPDTARY;IGTDSHTPNGGGLGGIC;ISSGLPKVAVPSTIHCDHLIE;LAIAGTLKFNPETDF;LATAGAKYGVGF;LIGTDSHTPNGGGLGGIC;NELKPHINGPFTPDL;NELKPHINGPFTPDLAHPVAD				186	127;241;280;314;316;336;408;409	True;True;True;True;True;True;True;True	127;244;283;317;319;339;411;412	146;272;315;358;360;383;463;464;465	169;324;375;432;434;435;465;558;559;560;561	169;324;375;432;435;465;558;559			-1
Q99KU0	Q99KU0	1	1	1	Vacuole membrane protein 1	Vmp1	sp|Q99KU0|VMP1_MOUSE Vacuole membrane protein 1 OS=Mus musculus OX=10090 GN=Vmp1 PE=1 SV=2	1	1	1	1	1	1	1	1.7	1.7	1.7	45.96	406	406	0.0054348	5.8618	1.7	0	0	1	LVPFWTF				187	376	TRUE	379	427	516	516			-1
Q99P91	Q99P91	1	1	1	Transmembrane glycoprotein NMB	Gpnmb	sp|Q99P91|GPNMB_MOUSE Transmembrane glycoprotein NMB OS=Mus musculus OX=10090 GN=Gpnmb PE=1 SV=2	1	1	1	1	1	1	1	1.7	1.7	1.7	63.675	574	574	0.0092593	5.553	1.7	798110	798110	0	LLLAAGLPLQ				188	352	TRUE	355	401	485	485			-1
Q99PT1	Q99PT1	1	1	1	Rho GDP-dissociation inhibitor 1	Arhgdia	sp|Q99PT1|GDIR1_MOUSE Rho GDP-dissociation inhibitor 1 OS=Mus musculus OX=10090 GN=Arhgdia PE=1 SV=3	1	1	1	1	1	1	1	7.8	7.8	7.8	23.407	204	204	0.005102	5.6745	7.8	917570	917570	1	GRVAVSADPNVPNVIV				189	206	TRUE	209	235	281	281			-1
Q9CPU0	Q9CPU0	1	1	1	Lactoylglutathione lyase	Glo1	sp|Q9CPU0|LGUL_MOUSE Lactoylglutathione lyase OS=Mus musculus OX=10090 GN=Glo1 PE=1 SV=3	1	1	1	1	1	1	1	7.1	7.1	7.1	20.809	184	184	0	9.2026	7.1	525000	525000	1	IEILNPNKIATII				190	232	TRUE	235	263	314	314			-1
Q9CPX8	Q9CPX8	1	1	1	Cytochrome b-c1 complex subunit 10	Uqcr11	sp|Q9CPX8|QCR10_MOUSE Cytochrome b-c1 complex subunit 10 OS=Mus musculus OX=10090 GN=Uqcr11 PE=1 SV=1	1	1	1	1	1	1	1	17.9	17.9	17.9	6.5386	56	56	0.005618	5.9122	17.9	1806700	1806700	1	DWVPYINGKF				191	91	TRUE	91	103	121	121			-1
Q9CQA3	Q9CQA3	1	1	1	Succinate dehydrogenase [ubiquinone] iron-sulfur subunit, mitochondrial	Sdhb	sp|Q9CQA3|SDHB_MOUSE Succinate dehydrogenase [ubiquinone] iron-sulfur subunit, mitochondrial OS=Mus musculus OX=10090 GN=Sdhb PE=1 SV=1	1	1	1	1	1	1	1	4.6	4.6	4.6	31.814	282	282	0	9.0819	4.6	1108800	1108800	1	WWNGDKYLGPAVL				192	632	TRUE	635	713	856	856			-1
Q9CQQ7	Q9CQQ7	2	2	2	ATP synthase F(0) complex subunit B1, mitochondrial	Atp5f1	sp|Q9CQQ7|AT5F1_MOUSE ATP synthase F(0) complex subunit B1, mitochondrial OS=Mus musculus OX=10090 GN=Atp5pb PE=1 SV=1	1	2	2	2	2	2	2	5.9	5.9	5.9	28.948	256	256	0	12.602	5.9	1819100	1819100	1	FLYPKTGVTGPYVL;QFLYPKTGVTGPYVL				193	148;460	True;True	148;463	168;521	193;629	193;629			-1
Q9CR61	Q9CR61	1	1	1	NADH dehydrogenase [ubiquinone] 1 beta subcomplex subunit 7	Ndufb7	sp|Q9CR61|NDUB7_MOUSE NADH dehydrogenase [ubiquinone] 1 beta subcomplex subunit 7 OS=Mus musculus OX=10090 GN=Ndufb7 PE=1 SV=3	1	1	1	1	1	1	1	13.9	13.9	13.9	16.331	137	137	0	7.5923	13.9	265850	265850	1	ASVEPDPEKIPSFPPDLGF				194	48	TRUE	48	55	66	66			-1
Q9CZC8	Q9CZC8	1	1	1	Secernin-1	Scrn1	sp|Q9CZC8|SCRN1_MOUSE Secernin-1 OS=Mus musculus OX=10090 GN=Scrn1 PE=1 SV=1	1	1	1	1	1	1	1	2.2	2.2	2.2	46.325	414	414	0.004878	5.6284	2.2	872940	872940	1	IVISRPAWL				195	286	TRUE	289	322	383	383			-1
Q9CZU6	Q9CZU6	4	4	4	Citrate synthase, mitochondrial	Cs	sp|Q9CZU6|CISY_MOUSE Citrate synthase, mitochondrial OS=Mus musculus OX=10090 GN=Cs PE=1 SV=1	1	4	4	4	4	4	4	10.3	10.3	10.3	51.736	464	464	0	25.318	10.3	5771400	5771400	4	DWSHNFTNM;LAGPLHGLANQ;LEQGKAKNPWPNVDAHSGVL;YKIVPNIL				196	90;313;326;655	True;True;True;True	90;316;329;658	102;357;373;739	120;431;451;885	120;431;451;885			-1
Q9D051	Q9D051	1	1	1	Pyruvate dehydrogenase E1 component subunit beta, mitochondrial	Pdhb	sp|Q9D051|ODPB_MOUSE Pyruvate dehydrogenase E1 component subunit beta, mitochondrial OS=Mus musculus OX=10090 GN=Pdhb PE=1 SV=1	1	1	1	1	1	1	1	5.3	5.3	5.3	38.937	359	359	0.0049261	5.6393	5.3	1464100	1464100	1	FLIPIGKAKIERQGTHITV				197	146	TRUE	146	166	191	191			-1
Q9D2G2	Q9D2G2	2	2	2	Dihydrolipoyllysine-residue succinyltransferase component of 2-oxoglutarate dehydrogenase complex, mitochondrial	Dlst	sp|Q9D2G2|ODO2_MOUSE Dihydrolipoyllysine-residue succinyltransferase component of 2-oxoglutarate dehydrogenase complex, mitochondrial OS=Mus musculus OX=10090 GN=Dlst PE=1 SV=1	1	2	2	2	2	2	2	3.7	3.7	3.7	48.994	454	454	0	15.844	3.7	1530700	1530700	1	ALLVPDGGKVEGGTPLF;LLVPDGGKVEGGTPLF				198	33;353	True;True	33;356	35;402	44;486	44;486			-1
Q9D6F9	Q9D6F9	34	2	2	Tubulin beta-4A chain	Tubb4a	sp|Q9D6F9|TBB4A_MOUSE Tubulin beta-4A chain OS=Mus musculus OX=10090 GN=Tubb4a PE=1 SV=3	1	34	2	2	34	2	2	40.1	3.6	3.6	49.585	444	444	0	12.972	40.1	10637000	10637000	2	FMPGFAPLTS;FMPGFAPLTSRGSQQ;FQLTHSLGGGTGSGM;FQLTHSLGGGTGSGMG;FQLTHSLGGGTGSGMGTL;FQLTHSLGGGTGSGMGTLL;FSVVPSPKVSD;FSVVPSPKVSDT;HFFMPGF;HFFMPGFAPLTS;HFFMPGFAPLTSRGSQQ;ISKIREEFPDRIMNT;ISKIREEFPDRIMNTF;IVHLQAGQCGNQIG;LRFPGQL;NMVPFPRLHF;PFPRLHF;PTYGDLNHLVS;QLTHSLGGGTGSGMGTL;RKLAVNMVPFPRLHF;RTLKLTTPTYGDL;RTLKLTTPTYGDLNHLVS;SGVTTCLRFPGQL;TVVEPYNATL;VEWIPNNVKT;VPFPRLHF;VTTCLRFPGQL;VVEPYNATL;WEVISDEHGID;WEV…				199	150;151;157;158;159;160;185;186;210;212;213;276;277;283;359;417;435;452;462;474;477;478;484;519;530;576;591;593;606;609;610;611;666;667	False;False;False;False;False;False;False;False;False;False;False;True;True;False;False;False;False;False;False;False;False;False;False;False;False;False;False;False;False;False;False;False;False;False	150;151;157;158;159;160;161;162;188;189;213;215;216;279;280;286;362;420;438;455;465;477;480;481;487;522;533;579;594;596;609;612;613;614;669;670	170;171;172;178;179;180;181;182;183;213;214;239;241;242;243;308;309;310;318;408;474;495;513;523;536;540;541;547;585;596;648;665;667;685;688;689;690;750;751	195;196;197;198;199;207;208;209;210;211;212;213;214;215;216;217;218;219;256;257;258;259;285;287;288;289;290;368;369;370;379;494;495;571;572;594;595;620;631;645;649;650;651;657;703;704;718;719;780;781;801;803;804;825;826;829;830;831;896;897	195;198;208;210;213;218;257;258;285;287;288;369;370;379;494;571;594;620;631;645;649;651;657;703;718;780;801;804;826;829;830;831;896;897	1	147	-1
Q9D6J5	Q9D6J5	1	1	1	NADH dehydrogenase [ubiquinone] 1 beta subcomplex subunit 8, mitochondrial	Ndufb8	sp|Q9D6J5|NDUB8_MOUSE NADH dehydrogenase [ubiquinone] 1 beta subcomplex subunit 8, mitochondrial OS=Mus musculus OX=10090 GN=Ndufb8 PE=1 SV=1	1	1	1	1	1	1	1	11.8	11.8	11.8	21.876	186	186	0	7.6108	11.8	1021600	1021600	1	WVGHVFPSYQPVGPKQYPYNNL				200	629	TRUE	632	710	853	853			-1
Q9DB20	Q9DB20	3	3	3	ATP synthase subunit O, mitochondrial	Atp5o	sp|Q9DB20|ATPO_MOUSE ATP synthase subunit O, mitochondrial OS=Mus musculus OX=10090 GN=Atp5po PE=1 SV=1	1	3	3	3	3	3	3	18.3	18.3	18.3	23.363	213	213	0	17.107	18.3	2900900	2900900	3	EIKTDPSIMGGM;IVRIGEKYVDM;LAENGRLGNTQGIISA				201	96;290;311	True;True;True	96;293;314	109;328;355	127;389;428;429	127;389;429			-1
Q9DB77	Q9DB77	1	1	1	Cytochrome b-c1 complex subunit 2, mitochondrial	Uqcrc2	sp|Q9DB77|QCR2_MOUSE Cytochrome b-c1 complex subunit 2, mitochondrial OS=Mus musculus OX=10090 GN=Uqcrc2 PE=1 SV=1	1	1	1	1	1	1	1	2.2	2.2	2.2	48.234	453	453	0	6.2883	2.2	1789900	1789900	1	VGLGVSHSVL				202	549	TRUE	552	619	745	745			-1
Q9DBG3	Q9DBG3	2	2	2	AP-2 complex subunit beta	Ap2b1	sp|Q9DBG3|AP2B1_MOUSE AP-2 complex subunit beta OS=Mus musculus OX=10090 GN=Ap2b1 PE=1 SV=1	1	2	2	2	2	2	2	3.4	3.4	3.4	104.58	937	937	0	13.198	3.4	1107200	1107200	2	DLGPPVNVPQVSSM;GVIPSTPLAIHTPLMPNQ				203	69;207	True;True	69;210	79;236	93;282	93;282			-1
Q9DBJ1;O70250	Q9DBJ1;O70250	8;4	8;4	8;4	Phosphoglycerate mutase 1;Phosphoglycerate mutase 2	Pgam1;Pgam2	sp|Q9DBJ1|PGAM1_MOUSE Phosphoglycerate mutase 1 OS=Mus musculus OX=10090 GN=Pgam1 PE=1 SV=3;sp|O70250|PGAM2_MOUSE Phosphoglycerate mutase 2 OS=Mus musculus OX=10090 GN=Pgam2 PE=1 SV=3	2	8	8	8	8	8	8	30.7	30.7	30.7	28.832	254	254;253	0	61.03	30.7	16320000	16320000	11	AVAAQGKVKK;ELNLPTGIPIVY;ELNLPTGIPIVYE;LDKNLKPIKPMQF;LNLPTGIPIVY;NKAETAAKHGEAQVKIWRRSYDVPPPPMEPDHPF;QVKIWRRSYDVPPPPMEPDHPF;RALPFWNE				204	56;100;101;319;355;413;467;469	True;True;True;True;True;True;True;True	56;100;101;322;358;416;470;472	65;113;114;364;365;404;469;529;531	76;77;131;132;440;441;488;565;566;637;639;640	76;131;132;441;488;565;637;639			-1;-1
Q9DC69	Q9DC69	2	2	2	NADH dehydrogenase [ubiquinone] 1 alpha subcomplex subunit 9, mitochondrial	Ndufa9	sp|Q9DC69|NDUA9_MOUSE NADH dehydrogenase [ubiquinone] 1 alpha subcomplex subunit 9, mitochondrial OS=Mus musculus OX=10090 GN=Ndufa9 PE=1 SV=2	1	2	2	2	2	2	2	7.4	7.4	7.4	42.525	377	377	0	19.295	7.4	2276900	2276900	3	FGLSPFEPWTTKD;GMTHRTFIPYPLPLF				205	126;203	True;True	126;206	145;231;232	168;277;278	168;277			-1
Q9DCU2	Q9DCU2	1	1	1	Plasmolipin	Pllp	sp|Q9DCU2|PLLP_MOUSE Plasmolipin OS=Mus musculus OX=10090 GN=Pllp PE=1 SV=1	1	1	1	1	1	1	1	4.9	4.9	4.9	19.801	182	182	0.0051813	5.7188	4.9	238410	238410	1	YMVPWPLVL				206	659	TRUE	662	743	889	889			-1
Q9DCX2	Q9DCX2	3	3	3	ATP synthase subunit d, mitochondrial	Atp5h	sp|Q9DCX2|ATP5H_MOUSE ATP synthase subunit d, mitochondrial OS=Mus musculus OX=10090 GN=Atp5pd PE=1 SV=3	1	3	3	3	3	3	3	26.1	26.1	26.1	18.749	161	161	0	17.322	26.1	4818100	4818100	2	LKIPVPEDKY;VEVMPQNQKAIGNAL;YEKQLEKMRNIIPFDQM				207	346;529;639	True;True;True	349;532;642	394;595;722	477;717;866	477;717;866			-1
Q9EQ20	Q9EQ20	2	2	2	Methylmalonate-semialdehyde dehydrogenase [acylating], mitochondrial	Aldh6a1	sp|Q9EQ20|MMSA_MOUSE Methylmalonate-semialdehyde dehydrogenase [acylating], mitochondrial OS=Mus musculus OX=10090 GN=Aldh6a1 PE=1 SV=1	1	2	2	2	2	2	2	2.2	2.2	2.2	57.915	535	535	0	11.817	2.2	857180	857180	3	VNVPIPVPLPMF;VPIPVPLPMF				208	575;577	True;True	578;580	647;649	779;782;783	779;782			-1
Q9ERD7	Q9ERD7	25	2	2	Tubulin beta-3 chain	Tubb3	sp|Q9ERD7|TBB3_MOUSE Tubulin beta-3 chain OS=Mus musculus OX=10090 GN=Tubb3 PE=1 SV=1	1	25	2	2	25	2	2	31.6	6.4	6.4	50.418	450	450	0	15.773	31.6	10619000	10619000	4	FMPGFAPLTA;FQLTHSLGGGTGSGM;FQLTHSLGGGTGSGMG;FQLTHSLGGGTGSGMGTL;FQLTHSLGGGTGSGMGTLL;FSVVPSPKVSD;FSVVPSPKVSDT;HFFMPGF;HFFMPGFAPLTA;LFRPDNF;LRFPGQL;NMVPFPRLHF;PFPRLHF;PTYGDLNHLVS;QLTHSLGGGTGSGMGTL;RKLAVNMVPFPRLHF;RTLKLATPTYGDL;TVVEPYNATL;VPFPRLHF;VTTSLRFPGQL;VVEPYNATL;WEVISDEHGID;YRALTVPEL;YRALTVPELTQQMF;YYNEASSHKYVPRAIL				209	149;157;158;159;160;185;186;210;211;329;359;417;435;452;462;474;476;519;576;592;593;606;666;667;678	False;False;False;False;False;False;False;False;False;False;False;False;False;False;False;False;True;False;False;False;False;False;False;False;True	149;157;158;159;160;161;162;188;189;213;214;332;362;420;438;455;465;477;479;522;579;595;596;609;669;670;681	169;178;179;180;181;182;183;213;214;239;240;376;408;474;495;513;523;536;539;585;648;666;667;685;750;751;763;764;765	194;207;208;209;210;211;212;213;214;215;216;217;218;219;256;257;258;259;285;286;455;494;495;571;572;594;595;620;631;645;648;703;704;780;781;802;803;804;825;826;896;897;911;912;913	194;208;210;213;218;257;258;285;286;455;494;571;594;620;631;645;648;703;780;802;804;826;896;897;911	1	147	-1
Q9JHU4	Q9JHU4	2	2	2	Cytoplasmic dynein 1 heavy chain 1	Dync1h1	sp|Q9JHU4|DYHC1_MOUSE Cytoplasmic dynein 1 heavy chain 1 OS=Mus musculus OX=10090 GN=Dync1h1 PE=1 SV=2	1	2	2	2	2	2	2	0.7	0.7	0.7	532.04	4644	4644	0	13.543	0.7	1131100	1131100	2	IRRITTVPLPTAPNVPIIDY;WSPWQAKVPQIE				210	273;625	True;True	276;628	305;706	365;849	365;849			-1
Q9JIS5	Q9JIS5	1	1	1	Synaptic vesicle glycoprotein 2A	Sv2a	sp|Q9JIS5|SV2A_MOUSE Synaptic vesicle glycoprotein 2A OS=Mus musculus OX=10090 GN=Sv2a PE=1 SV=1	1	1	1	1	1	1	1	1.3	1.3	1.3	82.646	742	742	0.0054645	5.867	1.3	1238400	1238400	1	VGITKAAPIL				211	546	TRUE	549	616	742	742			-1
Q9JJK2	Q9JJK2	1	1	1	LanC-like protein 2	Lancl2	sp|Q9JJK2|LANC2_MOUSE LanC-like protein 2 OS=Mus musculus OX=10090 GN=Lancl2 PE=1 SV=1	1	1	1	1	1	1	1	3.3	3.3	3.3	50.777	450	450	0	7.0086	3.3	1221900	1221900	1	PGLPFHPNGKIVPNF				212	437	TRUE	440	497	597	597			-1
Q9JKD3	Q9JKD3	1	1	1	Secretory carrier-associated membrane protein 5	Scamp5	sp|Q9JKD3|SCAM5_MOUSE Secretory carrier-associated membrane protein 5 OS=Mus musculus OX=10090 GN=Scamp5 PE=1 SV=1	1	1	1	1	1	1	1	5.5	5.5	5.5	26.068	235	235	0	12.985	5.5	0	0	0	AEKVNNFPPLPKF				213	12	TRUE	12	12	15	15			-1
Q9JM76	Q9JM76	1	1	1	Actin-related protein 2/3 complex subunit 3	Arpc3	sp|Q9JM76|ARPC3_MOUSE Actin-related protein 2/3 complex subunit 3 OS=Mus musculus OX=10090 GN=Arpc3 PE=1 SV=3	1	1	1	1	1	1	1	9	9	9	20.524	178	178	0	10.005	9	706600	706600	1	ITNFPIPGEPGFPLNA				214	282	TRUE	285	317	378	378			-1
Q9JMF3	Q9JMF3	1	1	1	Guanine nucleotide-binding protein G(I)/G(S)/G(O) subunit gamma-13	Gng13	sp|Q9JMF3|GBG13_MOUSE Guanine nucleotide-binding protein G(I)/G(S)/G(O) subunit gamma-13 OS=Mus musculus OX=10090 GN=Gng13 PE=1 SV=1	1	1	1	1	1	1	1	26.9	26.9	26.9	7.9793	67	67	0.0053763	5.8448	26.9	281070	281070	1	LKWIEDGIPKDPFLNPDL				215	348	TRUE	351	396	480	480			-1
Q9QYC0	Q9QYC0	1	1	1	Alpha-adducin	Add1	sp|Q9QYC0|ADDA_MOUSE Alpha-adducin OS=Mus musculus OX=10090 GN=Add1 PE=1 SV=2	1	1	1	1	1	1	1	1.1	1.1	1.1	80.646	735	735	0	7.1426	1.1	39819	39819	1	LIVPFGLL				216	343	TRUE	346	391	474	474			-1
Q9QYR6	Q9QYR6	2	2	2	Microtubule-associated protein 1A;MAP1A heavy chain;MAP1 light chain LC2	Map1a	sp|Q9QYR6|MAP1A_MOUSE Microtubule-associated protein 1A OS=Mus musculus OX=10090 GN=Map1a PE=1 SV=2	1	2	2	2	2	2	2	2	2	2	300.14	2776	2776	0	17.473	2	2094100	2094100	4	AEIPPWVPKDRPLPPAPLSPAPAPPTPAPDPHAPAPFSWG;PSFTPPAVPPRAPISL				217	11;448	True;True	11;451	11;508	13;14;609;610	14;609			-1
Q9R0P9	Q9R0P9	3	3	3	Ubiquitin carboxyl-terminal hydrolase isozyme L1	Uchl1	sp|Q9R0P9|UCHL1_MOUSE Ubiquitin carboxyl-terminal hydrolase isozyme L1 OS=Mus musculus OX=10090 GN=Uchl1 PE=1 SV=1	1	3	3	3	3	3	3	18.4	18.4	18.4	24.838	223	223	0	16.876	18.4	4805300	4805300	2	KGQEVSPKVYF;LLFPLTAQHENF;YELDGRMPFPVNHGASSE				218	301;350;640	True;True;True	304;353;643	340;398;723	401;482;867	401;482;867			-1
Q9R0Q6	Q9R0Q6	1	1	1	Actin-related protein 2/3 complex subunit 1A	Arpc1a	sp|Q9R0Q6|ARC1A_MOUSE Actin-related protein 2/3 complex subunit 1A OS=Mus musculus OX=10090 GN=Arpc1a PE=1 SV=1	1	1	1	1	1	1	1	5.1	5.1	5.1	41.626	370	370	0	10.56	5.1	1904900	1904900	1	VDEKPASTPWGSKMPFGQL				219	524	TRUE	527	590	711	711			-1
Q9WUM3	Q9WUM3	1	1	1	Coronin-1B	Coro1b	sp|Q9WUM3|COR1B_MOUSE Coronin-1B OS=Mus musculus OX=10090 GN=Coro1b PE=1 SV=1	1	1	1	1	1	1	1	2.5	2.5	2.5	53.912	484	484	0	6.6446	2.5	52329	52329	1	FEITDEPPYIHF				220	120	TRUE	120	137	160	160			-1
Q9Z1G4	Q9Z1G4	4	4	4	V-type proton ATPase 116 kDa subunit a isoform 1	Atp6v0a1	sp|Q9Z1G4|VPP1_MOUSE V-type proton ATPase 116 kDa subunit a 1 OS=Mus musculus OX=10090 GN=Atp6v0a1 PE=1 SV=3	1	4	4	4	4	4	4	3.2	3.2	3.2	96.466	839	839	0	24.091	3.2	1986900	1986900	4	FKFLPFSF;GFIPEIIF;KFLPFSF;MGRGAPLRLGF				221	139;200;300;389	True;True;True;True	139;203;303;392	158;228;339;441	182;274;400;533	182;274;400;533			-1
Q9Z2Q6	Q9Z2Q6	4	4	4	Septin-5	2023-09-05	sp|Q9Z2Q6|SEPT5_MOUSE Septin-5 OS=Mus musculus OX=10090 GN=Septin5 PE=1 SV=2	1	4	4	4	4	4	4	8.7	8.7	8.7	42.747	369	369	0	25.987	8.7	2518000	2518000	4	ESPIPILPLPTPDAE;ESPIPILPLPTPDAET;LKESAPFAVIGSN;SRMESPIPILPLPTPDAET				222	105;106;345;492	True;True;True;True	105;106;348;495	118;119;393;555	136;137;476;667	136;137;476;667			-1
REV__P41155	REV__P41155	1	1	1			sp|P41155|TNFC_MOUSE Lymphotoxin-beta OS=Mus musculus OX=10090 GN=Ltb PE=2 SV=1	1	1	1	1	1	1	1	0	0	0	32.328	306	306	0.0057143	5.9801	0	3951000	3951000	1	LQALGGF		+		223	356	TRUE	359	405	489	489			-1
REV__Q3MI48	REV__Q3MI48	1	1	1			sp|Q3MI48|JSPR1_MOUSE Junctional sarcoplasmic reticulum protein 1 OS=Mus musculus OX=10090 GN=Jsrp1 PE=1 SV=2	1	1	1	1	1	1	1	0	0	0	36.092	332	332	0.009434	5.575	0	3573600	3573600	1	NLTLDGWPLD		+		224	415	TRUE	418	471	568	568			-1

## Sheet: Peptide
Sequence	N-term cleavage window	C-term cleavage window	Amino acid before	First amino acid	Second amino acid	Second last amino acid	Last amino acid	Amino acid after	A Count	R Count	N Count	D Count	C Count	Q Count	E Count	G Count	H Count	I Count	L Count	K Count	M Count	F Count	P Count	S Count	T Count	W Count	Y Count	V Count	U Count	O Count	Length	Missed cleavages	Mass	Proteins	Leading razor protein	Start position	End position	Gene names	Protein names	Unique (Groups)	Unique (Proteins)	Charges	PEP	Score	Experiment Brain_BU_LongerGradient_250um	Intensity	Intensity Brain_BU_LongerGradient_250um	Reverse	Potential contaminant
AAAPGHSAVPPPPQPQLPPLPPLPRPLSE	EEETATEGEEEEEEEAAAPGHSAVPPPPQP	PQLPPLPPLPRPLSERITREEVEGESLDLC	E	A	A	S	E	R	4	1	0	0	0	2	1	1	1	0	4	0	0	0	12	2	0	0	0	1	0	0	29		2927.6	Q80TL0	Q80TL0	102	130	Ppm1e	Protein phosphatase 1E	yes	yes	3	0.015797	80.729	1	345680	345680
AADESTGSIAKRLQSIGTE	SDIAHRIVAPGKGILAADESTGSIAKRLQS	STGSIAKRLQSIGTENTEENRRFYRQLLLT	L	A	A	T	E	N	3	1	0	1	0	1	2	2	0	2	1	1	0	0	0	3	2	0	0	0	0	0	19		1932.98	P05064	P05064	32	50	Aldoa	Fructose-bisphosphate aldolase A	yes	yes	3	0.00048713	115.41	1	5401200	5401200
AAEKTKQGVTE	VFMKGLSMAKEGVVAAAEKTKQGVTEAAEK	GVVAAAEKTKQGVTEAAEKTKEGVLYVGSK	A	A	A	T	E	A	2	0	0	0	0	1	2	1	0	0	0	2	0	0	0	0	2	0	0	1	0	0	11		1160.6	Q91ZZ3	Q91ZZ3	18	28	Sncb	Beta-synuclein	yes	yes	2	0.014803	99.788	1	703120	703120
AAGNKYVPRAIL	DSDLQLERINVYYNEAAGNKYVPRAILVDL	YNEAAGNKYVPRAILVDLEPGTMDSVRSGP	E	A	A	I	L	V	3	1	1	0	0	0	0	1	0	1	1	1	0	0	1	0	0	0	1	1	0	0	12		1271.73	Q7TMM9	Q7TMM9	54	65	Tubb2a	Tubulin beta-2A chain	yes	yes	2	0.0041133	133.57	1	5825700	5825700
AAKAPAPAAPAAAEPQAEAPAA	PSSKETPAASEAPSSAAKAPAPAAPAAAEP	AAPAAAEPQAEAPAAAASSEQSVAVKE___	S	A	A	A	A	A	13	0	0	0	0	1	2	0	0	0	0	1	0	0	5	0	0	0	0	0	0	0	22		1941	Q91XV3	Q91XV3	193	214	Basp1	Brain acid soluble protein 1	yes	yes	2	4.2197e-12	211.7	1	1784800	1784800
AAMAPPGPRVAPAPAGVF	DIDSFVPSKAAPAAAAAMAPPGPRVAPAPA	APPGPRVAPAPAGVFTDIPISNIRRVIAQR	A	A	A	V	F	T	6	1	0	0	0	0	0	2	0	0	0	0	1	1	5	0	0	0	0	2	0	0	18		1675.89	Q8BMF4	Q8BMF4	398	415	Dlat	Dihydrolipoyllysine-residue acetyltransferase component of pyruvate dehydrogenase complex, mitochondrial	yes	yes	2	3.929e-05	152.07	1	1489200	1489200
AAPFMRAPPGAPEKQPAPGDA	LWVGNLWFVFKETGWAAPFMRAPPGAPEKQ	APPGAPEKQPAPGDAYGDAGYGQGPGGYGP	W	A	A	D	A	Y	6	1	0	1	0	1	1	2	0	0	0	1	1	1	6	0	0	0	0	0	0	0	21		2075.03	Q62277	Q62277	230	250	Syp	Synaptophysin	yes	yes	3	0.012032	95.996	1	2935900	2935900
AAPLVPLSQQIPGGNPLY	______________________________	LVPLSQQIPGGNPLYESYYKQVDPAYTGRV	M	A	A	L	Y	E	2	0	1	0	0	2	0	2	0	1	3	0	0	0	4	1	0	0	1	1	0	0	18		1834	Q60902	Q60902	2	19	Eps15l1	Epidermal growth factor receptor substrate 15-like 1	yes	yes	2	0.031024	74.76	1	0	0
AARPAPAPVPSPAPPQPVQPGPPGGSRATPGPGRF	TSRSPAGLRRANSVQAARPAPAPVPSPAPP	GPPGGSRATPGPGRFPEQSTEAPPSDPGYP	Q	A	A	R	F	P	6	3	0	0	0	2	0	5	0	0	0	0	0	1	13	2	1	0	0	2	0	0	35		3335.76	P47708	P47708	274	308	Rph3a	Rabphilin-3A	yes	yes	4	0.0054298	103.5	1	1640200	1640200
ADIKNNPEYSSF	______________________________	______________________________	M	A	D	S	F	F	1	0	2	1	0	0	1	0	0	1	0	1	0	1	1	2	0	0	1	0	0	0	12		1383.63	P63082	P63082	2	13	Atp6v0c	V-type proton ATPase 16 kDa proteolipid subunit	yes	yes	2	0.00056337	144.17	1	0	0
AEFQPLVEEPKN	CCAEANPPACYGTVLAEFQPLVEEPKNLVK	TVLAEFQPLVEEPKNLVKTNCDLYEKLGEY	L	A	E	K	N	L	1	0	1	0	0	1	3	0	0	0	1	1	0	1	2	0	0	0	0	1	0	0	12		1399.7	P07724	P07724	399	410	Alb	Serum albumin	yes	yes	2	1.0173e-06	143.97	1	0	0
AEIPPWVPKDRPLPPAPLSPAPAPPTPAPDPHAPAPFSWG	STPPTRNEPTTPSWLAEIPPWVPKDRPLPP	TPAPDPHAPAPFSWGIAEYDSVVAAVQEGA	L	A	E	W	G	I	7	1	0	2	0	0	1	1	1	1	2	1	0	1	16	2	1	2	0	1	0	0	40		4138.15	Q9QYR6	Q9QYR6	1811	1850	Map1a	Microtubule-associated protein 1A;MAP1A heavy chain;MAP1 light chain LC2	yes	yes	4	2.504e-06	151.5	1	1300800	1300800
AEKVNNFPPLPKF	______________________________	______________________________	M	A	E	K	F	I	1	0	2	0	0	0	1	0	0	0	1	2	0	2	3	0	0	0	0	1	0	0	13		1499.81	Q9JKD3	Q9JKD3	2	14	Scamp5	Secretory carrier-associated membrane protein 5	yes	yes	2	1.0355e-09	227.94	1	0	0
AELRHVMTNL	AFRVFDKDGNGYISAAELRHVMTNLGEKLT	GYISAAELRHVMTNLGEKLTDEEVDEMIRE	A	A	E	N	L	G	1	1	1	0	0	0	1	0	1	0	2	0	1	0	0	0	1	0	0	1	0	0	10		1182.62	P0DP28;P0DP27;P0DP26	P0DP28	104	113			yes	no	2	0.033588	77.049	1	8657900	8657900
AENGFLPFHL	MIQALGGFFTYFVILAENGFLPFHLLGIRE	YFVILAENGFLPFHLLGIRETWDDRWVNDV	L	A	E	H	L	L	1	0	1	0	0	0	1	1	1	0	2	0	0	2	1	0	0	0	0	0	0	0	10		1143.57	Q8VDN2	Q8VDN2	874	883	Atp1a1	Sodium/potassium-transporting ATPase subunit alpha-1	yes	yes	2	0.0015671	137.14	1	982000	982000
AENGFLPFHLLG	MIQALGGFFTYFVILAENGFLPFHLLGIRE	VILAENGFLPFHLLGIRETWDDRWVNDVED	L	A	E	L	G	I	1	0	1	0	0	0	1	2	1	0	3	0	0	2	1	0	0	0	0	0	0	0	12		1313.68	Q8VDN2	Q8VDN2	874	885	Atp1a1	Sodium/potassium-transporting ATPase subunit alpha-1	yes	yes	2	4.3974e-06	183.81	1	5112100	5112100
AENGFLPSRL	MIQALGGFFTYFVILAENGFLPSRLLGIRL	YFVILAENGFLPSRLLGIRLDWDDRTTNDL	L	A	E	R	L	L	1	1	1	0	0	0	1	1	0	0	2	0	0	1	1	1	0	0	0	0	0	0	10		1102.58	Q6PIE5	Q6PIE5	871	880	Atp1a2	Sodium/potassium-transporting ATPase subunit alpha-2	yes	yes	2	0.029391	82.261	1	2146000	2146000
AERKFMNPFNLPNL	NLQLKEGLQNMEARLAERKFMNPFNLPNLY	LAERKFMNPFNLPNLYQKLENDPRTRSLLS	L	A	E	N	L	Y	1	1	3	0	0	0	1	0	0	0	2	1	1	2	2	0	0	0	0	0	0	0	14		1689.87	Q60864	Q60864	120	133	Stip1	Stress-induced-phosphoprotein 1	yes	yes	3	0.012797	101.53	1	1534300	1534300
AETDRVTGTNKGISPVPINL	SKKFTDFDEVRQEIEAETDRVTGTNKGISP	VTGTNKGISPVPINLRVYSPHVLNLTLIDL	E	A	E	N	L	R	1	1	2	1	0	0	1	2	0	2	1	1	0	0	2	1	3	0	0	2	0	0	20		2081.11	P39053;P39054	P39054	103	122	Dnm1;Dnm2	Dynamin-1;Dynamin-2	no	no	3	1.5841e-05	153.14	1	2336400	2336400
AFRGPFPPVWNPITY	NEVERLIHFVKGKSYAFRGPFPPVWNPITY	AFRGPFPPVWNPITYLDNNNLWRTMDEMGQ	Y	A	F	T	Y	L	1	1	1	0	0	0	0	1	0	1	0	0	0	2	4	0	1	1	1	1	0	0	15		1760.9	Q8BW75	Q8BW75	98	112	Maob	Amine oxidase [flavin-containing] B	yes	yes	2	0.00045633	137.17	1	172580	172580
AGDDAPRAVF	ALVIDNGSGMCKAGFAGDDAPRAVFPSIVG	CKAGFAGDDAPRAVFPSIVGRPRHQGVMVG	F	A	G	V	F	P	3	1	0	2	0	0	0	1	0	0	0	0	0	1	1	0	0	0	0	1	0	0	10		1017.49	P63260;P60710;P63268;P68134;P68033;P62737	P63260	22	31	Actg1;Actb;Actg2;Acta1;Actc1;Acta2	Actin, cytoplasmic 2;Actin, cytoplasmic 2, N-terminally processed;Actin, cytoplasmic 1;Actin, cytoplasmic 1, N-terminally processed;Actin, gamma-enteric smooth muscle;Actin, alpha skeletal muscle;Actin, alpha cardiac muscle 1;Actin, aortic smooth muscle	yes	no	2	0.034296	76.17	1	11562000	11562000
AGIENKFGLYLPKFKSPSVA	NPDHIGGYRLATATFAGIENKFGLYLPKFK	KFGLYLPKFKSPSVAVAQPKAAAAAQ____	F	A	G	V	A	V	2	0	1	0	0	0	1	2	0	1	2	3	0	2	2	2	0	0	1	1	0	0	20		2165.19	Q8BH59	Q8BH59	647	666	Slc25a12	Calcium-binding mitochondrial carrier protein Aralar1	yes	yes	4	0.025456	77.681	1	528980	528980
AGNPEVILPVPAF	AVEKGVPLYRHIADLAGNPEVILPVPAFNV	DLAGNPEVILPVPAFNVINGGSHAGNKLAM	L	A	G	A	F	N	2	0	1	0	0	0	1	1	0	1	1	0	0	1	3	0	0	0	0	2	0	0	13		1322.72	P17182	P17182	138	150	Eno1	Alpha-enolase	yes	yes	2	9.4352e-07	190.24	1	8293100	8293100
AHFLPQGTPISL	GAVITGFRHKLKSSLAHFLPQGTPISLIPM	SSLAHFLPQGTPISLIPMLIIIETISLFIQ	L	A	H	S	L	I	1	0	0	0	0	1	0	1	1	1	2	0	0	1	2	1	1	0	0	0	0	0	12		1279.69	P00848	P00848	126	137	Mtatp6	ATP synthase subunit a	yes	yes	2	5.5407e-09	218.47	1	3784900	3784900
AHLGVPIVT	HAQIPPEDSEIITNMAHLGVPIVTDSTLRR	EIITNMAHLGVPIVTDSTLRRRSKPERKER	M	A	H	V	T	D	1	0	0	0	0	0	0	1	1	1	1	0	0	0	1	0	1	0	0	2	0	0	9		905.533	O08599	O08599	444	452	Stxbp1	Syntaxin-binding protein 1	yes	yes	2	0.021245	94.669	1	1851500	1851500
AIITPWNF	KDKRGLVLKQPVGVAAIITPWNFPSAMITR	KQPVGVAAIITPWNFPSAMITRKVGAALAA	A	A	I	N	F	P	1	0	1	0	0	0	0	0	0	2	0	0	0	1	1	0	1	1	0	0	0	0	8		960.507	Q8BWF0	Q8BWF0	187	194	Aldh5a1	Succinate-semialdehyde dehydrogenase, mitochondrial	yes	yes	2	0.0062727	119.89	1	246080	246080
AIQTGVDNPGHPYIM	ELRAKCTPSGFTLDDAIQTGVDNPGHPYIM	AIQTGVDNPGHPYIMTVGAVAGDEESYDVF	D	A	I	I	M	T	1	0	1	1	0	1	0	2	1	2	0	0	1	0	2	0	1	0	1	1	0	0	15		1611.77	Q04447	Q04447	56	70	Ckb	Creatine kinase B-type	yes	yes	2	8.8951e-11	197.3	1	4019300	4019300
AIQTGVDNPGHPYIMT	ELRAKCTPSGFTLDDAIQTGVDNPGHPYIM	IQTGVDNPGHPYIMTVGAVAGDEESYDVFK	D	A	I	M	T	V	1	0	1	1	0	1	0	2	1	2	0	0	1	0	2	0	2	0	1	1	0	0	16		1712.82	Q04447	Q04447	56	71	Ckb	Creatine kinase B-type	yes	yes	2	5.4842e-17	254.4	1	3907800	3907800
AKTEWLDGKHVVF	NAGPNTNGSQFFICTAKTEWLDGKHVVFGK	CTAKTEWLDGKHVVFGKVKEGMNIVEAMER	T	A	K	V	F	G	1	0	0	1	0	0	1	1	1	0	1	2	0	1	0	0	1	1	0	2	0	0	13		1528.8	P17742	P17742	117	129	Ppia	Peptidyl-prolyl cis-trans isomerase A;Peptidyl-prolyl cis-trans isomerase A, N-terminally processed	yes	yes	2;3;4	0.00018293	181.31	3	16391000	16391000
AKVAVLGASGGIGQPLSLLLKNSPLVSRLTL	GAALRRSFSTSAQNNAKVAVLGASGGIGQP	SLLLKNSPLVSRLTLYDIAHTPGVAADLSH	N	A	K	T	L	Y	3	1	1	0	0	1	0	4	0	1	8	2	0	0	2	4	1	0	0	3	0	0	31		3071.84	P08249	P08249	25	55	Mdh2	Malate dehydrogenase, mitochondrial	yes	yes	4	0.0067474	100.41	1	124290	124290
ALHVPKAPGF	______________________________	______________________________	M	A	L	G	F	A	2	0	0	0	0	0	0	1	1	0	1	1	0	1	2	0	0	0	0	1	0	0	10		1035.59	P42932	P42932	2	11	Cct8	T-complex protein 1 subunit theta	yes	yes	2	0.0053088	112.17	1	0	0
ALIGDEPLENYL	THKHNPASKYFPEAAALIGDEPLENYLDTE	EAAALIGDEPLENYLDTEYFGTIGIGTPAQ	A	A	L	Y	L	D	1	0	1	1	0	0	2	1	0	1	3	0	0	0	1	0	0	0	1	0	0	0	12		1345.68	P00791	P00791	58	69			yes	yes	2	3.1487e-07	171.33	1	0	0
ALIGDEPLENYLDTEY	THKHNPASKYFPEAAALIGDEPLENYLDTE	LIGDEPLENYLDTEYFGTIGIGTPAQDFTV	A	A	L	E	Y	F	1	0	1	2	0	0	3	1	0	1	3	0	0	0	1	0	1	0	2	0	0	0	16		1853.86	P00791	P00791	58	73			yes	yes	2	5.9477e-07	178.49	1	369280	369280
ALLVPDGGKVEGGTPLF	KTSVQVPSPANGIIEALLVPDGGKVEGGTP	LVPDGGKVEGGTPLFTLRKTGAAPAKAKPA	E	A	L	L	F	T	1	0	0	1	0	0	1	4	0	0	3	1	0	1	2	0	1	0	0	2	0	0	17		1668.91	Q9D2G2	Q9D2G2	126	142	Dlst	Dihydrolipoyllysine-residue succinyltransferase component of 2-oxoglutarate dehydrogenase complex, mitochondrial	yes	yes	2	0.037647	73.082	1	667640	667640
APIKVGDAIPSVE	ECGGARSFSSSAVTMAPIKVGDAIPSVEVF	TMAPIKVGDAIPSVEVFEGEPGKKVNLAEL	M	A	P	V	E	V	2	0	0	1	0	0	1	1	0	2	0	1	0	0	2	1	0	0	0	2	0	0	13		1294.71	P99029	P99029	50	62	Prdx5	Peroxiredoxin-5, mitochondrial	yes	yes	2	0.001224	124.46	1	2652800	2652800
APLAKVIHDNF	SLKIVSNASCTTNCLAPLAKVIHDNFGIVE	TNCLAPLAKVIHDNFGIVEGLMTTVHAITA	L	A	P	N	F	G	2	0	1	1	0	0	0	0	1	1	1	1	0	1	1	0	0	0	0	1	0	0	11		1223.67	P16858	P16858	156	166	Gapdh	Glyceraldehyde-3-phosphate dehydrogenase	yes	yes	2	0.0053065	136.36	1	4852000	4852000
APLAKVIHDNFG	SLKIVSNASCTTNCLAPLAKVIHDNFGIVE	NCLAPLAKVIHDNFGIVEGLMTTVHAITAT	L	A	P	F	G	I	2	0	1	1	0	0	0	1	1	1	1	1	0	1	1	0	0	0	0	1	0	0	12		1280.69	P16858	P16858	156	167	Gapdh	Glyceraldehyde-3-phosphate dehydrogenase	yes	yes	2	0.015993	98.257	1	1189400	1189400
ARDGPNALTPPPTTPEW	DCVQGLTHSKAQEILARDGPNALTPPPTTP	DGPNALTPPPTTPEWVKFCRQLFGGFSILL	L	A	R	E	W	V	2	1	1	1	0	0	1	1	0	0	1	0	0	0	5	0	3	1	0	0	0	0	17		1818.89	Q6PIC6;Q6PIE5;Q8VDN2	Q6PIC6	63	79	Atp1a3;Atp1a2;Atp1a1	Sodium/potassium-transporting ATPase subunit alpha-3;Sodium/potassium-transporting ATPase subunit alpha-2;Sodium/potassium-transporting ATPase subunit alpha-1	no	no	2	5.0332e-17	245.55	1	11521000	11521000
ARDWPDARGIWHNDNKTF	LFDKPVSPLLLASGMARDWPDARGIWHNDN	WPDARGIWHNDNKTFLVWINEEDHLRVISM	M	A	R	T	F	L	2	2	2	3	0	0	0	1	1	1	0	1	0	1	1	0	1	2	0	0	0	0	18		2198.04	Q04447	Q04447	208	225	Ckb	Creatine kinase B-type	yes	yes	4	0.010624	101.38	1	2439800	2439800
ARDWPDARGIWHNDNKTFL	LFDKPVSPLLLASGMARDWPDARGIWHNDN	PDARGIWHNDNKTFLVWINEEDHLRVISMQ	M	A	R	F	L	V	2	2	2	3	0	0	0	1	1	1	1	1	0	1	1	0	1	2	0	0	0	0	19		2311.12	Q04447	Q04447	208	226	Ckb	Creatine kinase B-type	yes	yes	4	0.00037946	124.08	1	10872000	10872000
ARDWPDARGIWHNNEKSFL	LFDKPVSPLLTAAGMARDWPDARGIWHNNE	PDARGIWHNNEKSFLIWVNEEDHTRVISME	M	A	R	F	L	I	2	2	2	2	0	0	1	1	1	1	1	1	0	1	1	1	0	2	0	0	0	0	19		2311.12	P30275	P30275	242	260	Ckmt1	Creatine kinase U-type, mitochondrial	yes	yes	5	0.023313	83.253	1	3446800	3446800
ARNLIPMDPNGLSDPYVKL	IRAPTSDEIHITVGEARNLIPMDPNGLSDP	IPMDPNGLSDPYVKLKLIPDPRNLTKQKTK	E	A	R	K	L	K	1	1	2	2	0	0	0	1	0	1	3	1	1	0	3	1	0	0	1	1	0	0	19		2112.1	P63318	P63318	180	198	Prkcg	Protein kinase C gamma type	yes	yes	3	0.0036079	100.21	1	499440	499440
ASGATPVF	APFDGILGLAYPSISASGATPVFDNLWDQG	LAYPSISASGATPVFDNLWDQGLVSQDLFS	S	A	S	V	F	D	2	0	0	0	0	0	0	1	0	0	0	0	0	1	1	1	1	0	0	1	0	0	8		748.376	P00791	P00791	189	196			yes	yes	1	0.039621	74.717	1	5539200	5539200
ASHHPADFTPAVHASL	PVNFKLLSHCLLVTLASHHPADFTPAVHAS	SHHPADFTPAVHASLDKFLASVSTVLTSKY	L	A	S	S	L	D	4	0	0	1	0	0	0	0	3	0	1	0	0	1	2	2	1	0	0	1	0	0	16		1656.8	P01942	P01942	111	126	Hba	Hemoglobin subunit alpha	yes	yes	2;3	1.2103e-06	161.67	2	7343800	7343800
ASLKDLEGKWRL	______________________________	______________________________	M	A	S	R	L	M	1	1	0	1	0	0	1	1	0	0	3	2	0	0	0	1	0	1	0	0	0	0	12		1414.79	Q05816	Q05816	2	13	Fabp5	Fatty acid-binding protein, epidermal	yes	yes	3	0.00027341	149.69	1	0	0
ASQKRPSQRSKY	IQEDPTAASGGLDVMASQKRPSQRSKYLAT	DVMASQKRPSQRSKYLATASTMDHARHGFL	M	A	S	K	Y	L	1	2	0	0	0	2	0	0	0	0	0	2	0	0	1	3	0	0	1	0	0	0	12		1434.77	P04370	P04370	135	146	Mbp	Myelin basic protein	yes	yes	2;3	0.00081063	162.38	4	0	0
ASQKRPSQRSKYLAT	IQEDPTAASGGLDVMASQKRPSQRSKYLAT	ASQKRPSQRSKYLATASTMDHARHGFLPRH	M	A	S	A	T	A	2	2	0	0	0	2	0	0	0	0	1	2	0	0	1	3	1	0	1	0	0	0	15		1719.94	P04370	P04370	135	149	Mbp	Myelin basic protein	yes	yes	2	0.034357	97.734	1	0	0
ASTMDHARHGFLPRHRDTGIL	ASQKRPSQRSKYLATASTMDHARHGFLPRH	ARHGFLPRHRDTGILDSIGRFFSGDRGAPK	T	A	S	I	L	D	2	3	0	2	0	0	0	2	3	1	2	0	1	1	1	1	2	0	0	0	0	0	21		2387.2	P04370	P04370	150	170	Mbp	Myelin basic protein	yes	yes	3;4	0.020628	82.406	2	67568000	67568000
ASVEPDPEKIPSFPPDLGF	______________________________	PDPEKIPSFPPDLGFPERKERVMVATQQEM	D	A	S	G	F	P	1	0	0	2	0	0	2	1	0	1	1	1	0	2	5	2	0	0	0	1	0	0	19		2041	Q9CR61	Q9CR61	13	31	Ndufb7	NADH dehydrogenase [ubiquinone] 1 beta subcomplex subunit 7	yes	yes	2	0.0002557	134.04	1	265850	265850
ATAQHDPALQPLL	PIANGDRQSPVDIDTATAQHDPALQPLLIS	DTATAQHDPALQPLLISYDKAASKSIVNNG	T	A	T	L	L	I	3	0	0	1	0	2	0	0	1	0	3	0	0	0	2	0	1	0	0	0	0	0	13		1373.73	P00920	P00920	36	48	Ca2	Carbonic anhydrase 2	yes	yes	2	0.035443	76.143	1	1313400	1313400
ATNVGDEGGFAPNIL	YHNLKNVIKEKYGKDATNVGDEGGFAPNIL	ATNVGDEGGFAPNILENKEALELLKTAIAK	D	A	T	I	L	E	2	0	2	1	0	0	1	3	0	1	1	0	0	1	1	0	1	0	0	1	0	0	15		1473.71	P17182;P21550;P17183	P17182	204	218	Eno1;Eno3;Eno2	Alpha-enolase;Beta-enolase;Gamma-enolase	no	no	2	0.026058	85.402	1	1467500	1467500
ATQKTVDGPSGKL	FGIVEGLMTTVHAITATQKTVDGPSGKLWR	ITATQKTVDGPSGKLWRDGRGAAQNIIPAS	T	A	T	K	L	W	1	0	0	1	0	1	0	2	0	0	1	2	0	0	1	1	2	0	0	1	0	0	13		1300.7	P16858	P16858	181	193	Gapdh	Glyceraldehyde-3-phosphate dehydrogenase	yes	yes	2	4.1568e-05	141.13	1	0	0
ATSAASPGPERRPPPAQAPAPQPAPQPAPTPSVG	QPPPAPGPGAATASAATSAASPGPERRPPP	APQPAPQPAPTPSVGSSFFSSLSQAVKQTA	A	A	T	V	G	S	8	2	0	0	0	3	1	2	0	0	0	0	0	0	12	3	2	0	0	1	0	0	34		3252.66	Q64332	Q64332	48	81	Syn2	Synapsin-2	yes	yes	3;4	6.0254e-15	214.44	2	1544000	1544000
ATTHSKAIHKIDIPSFDWPIAPF	LSFMGAFHGRTMGCLATTHSKAIHKIDIPS	HKIDIPSFDWPIAPFPRLKYPLEEFTTDNQ	L	A	T	P	F	P	3	0	0	2	0	0	0	0	2	4	0	2	0	2	3	2	2	1	0	0	0	0	23		2591.35	P61922	P61922	226	248	Abat	4-aminobutyrate aminotransferase, mitochondrial	yes	yes	4	0.018523	80.752	1	928980	928980
ATTHSKAIHKIDIPSFDWPIAPFPRLKYPLEE	LSFMGAFHGRTMGCLATTHSKAIHKIDIPS	WPIAPFPRLKYPLEEFTTDNQQEEARCLEE	L	A	T	E	E	F	3	1	0	2	0	0	2	0	2	4	2	3	0	2	5	2	2	1	1	0	0	0	32		3716.97	P61922	P61922	226	257	Abat	4-aminobutyrate aminotransferase, mitochondrial	yes	yes	6	0.043121	69.201	1	556600	556600
ATVPPAAPAGEGGPPAPPPNL	______________________________	APAGEGGPPAPPPNLTSNRRLQQTQAQVDE	A	A	T	N	L	T	5	0	1	0	0	0	1	3	0	0	1	0	0	0	8	0	1	0	0	1	0	0	21		1876.97	P63044	P63044	6	26	Vamp2	Vesicle-associated membrane protein 2	yes	yes	2;3	0.00011431	125.97	2	3452600	3452600
AVAAQGKVKK	MQFLGDEETVRKAMEAVAAQGKVKK_____	RKAMEAVAAQGKVKK_______________	E	A	V	K	K	-	3	0	0	0	0	1	0	1	0	0	0	3	0	0	0	0	0	0	0	2	0	0	10		998.624	Q9DBJ1	Q9DBJ1	245	254	Pgam1	Phosphoglycerate mutase 1	yes	yes	2	0.0022124	129.47	1	717180	717180
AVRQIFGDY	LYGALLLAEGFYTTGAVRQIFGDYKTTICG	GFYTTGAVRQIFGDYKTTICGKGLSATVTG	G	A	V	D	Y	K	1	1	0	1	0	1	0	1	0	1	0	0	0	1	0	0	0	0	1	1	0	0	9		1067.54	P60202	P60202	96	104	Plp1	Myelin proteolipid protein	yes	yes	2	0.0014888	145.63	1	8142900	8142900
AVVEPYNSIL	SKLEFSIYPAPQVSTAVVEPYNSILTTHTT	PQVSTAVVEPYNSILTTHTTLEHSDCAFMV	T	A	V	I	L	T	1	0	1	0	0	0	1	0	0	1	1	0	0	0	1	1	0	0	1	2	0	0	10		1103.59	P68373;P68369;P05213;P05214;Q9JJZ2	P68373	180	189	Tuba1c;Tuba1a;Tuba1b;Tuba3a;Tuba8	Tubulin alpha-1C chain;Tubulin alpha-1A chain;Tubulin alpha-1B chain;Tubulin alpha-3 chain;Tubulin alpha-8 chain	no	no	2	0.025368	87.258	1	2963300	2963300
AWINTPKKQGGLGPMNIPLISD	CQVIGASVDSHFCHLAWINTPKKQGGLGPM	KQGGLGPMNIPLISDPKRTIAQDYGVLKAD	L	A	W	S	D	P	1	0	2	1	0	1	0	3	0	3	2	2	1	0	3	1	1	1	0	0	0	0	22		2349.25	P35700	P35700	86	107	Prdx1	Peroxiredoxin-1	yes	yes	3	0.00028746	115.42	1	718800	718800
AWINTPRKEGGLGPLNIPLL	CEVLGVSVDSQFTHLAWINTPRKEGGLGPL	PRKEGGLGPLNIPLLADVTKSLSQNYGVLK	L	A	W	L	L	A	1	1	2	0	0	0	1	3	0	2	4	1	0	0	3	0	1	1	0	0	0	0	20		2158.23	Q61171	Q61171	85	104	Prdx2	Peroxiredoxin-2	yes	yes	3	5.2112e-05	149.73	1	4290400	4290400
CDKPWVF	AGIPSVNSLHSVYNFCDKPWVFAQMVRLHK	SLHSVYNFCDKPWVFAQMVRLHKKLGTEEF	F	C	D	V	F	A	0	0	0	1	1	0	0	0	0	0	0	1	0	1	1	0	0	1	0	1	0	0	7		893.411	O88935;Q64332	O88935	223	229	Syn1;Syn2	Synapsin-1;Synapsin-2	no	no	2	0.027407	97.071	1	2025800	2025800
CRIGFGPSPFSL	DIEIAAYRKLLEGEECRIGFGPSPFSLTEG	GEECRIGFGPSPFSLTEGLPKIPSISTHIK	E	C	R	S	L	T	0	1	0	0	1	0	0	2	0	1	1	0	0	2	2	2	0	0	0	0	0	0	12		1279.64	P19246	P19246	409	420	Nefh	Neurofilament heavy polypeptide	yes	yes	2	0.0043019	109.66	1	203850	203850
CRQLFGGF	NALTPPPTTPEWVKFCRQLFGGFSILLWIG	TPEWVKFCRQLFGGFSILLWIGAILCFLAY	F	C	R	G	F	S	0	1	0	0	1	1	0	2	0	0	1	0	0	2	0	0	0	0	0	0	0	0	8		926.443	Q6PIC6;Q9WV27;Q6PIE5;Q8VDN2	Q6PIC6	83	90	Atp1a3;Atp1a4;Atp1a2;Atp1a1	Sodium/potassium-transporting ATPase subunit alpha-3;Sodium/potassium-transporting ATPase subunit alpha-4;Sodium/potassium-transporting ATPase subunit alpha-2;Sodium/potassium-transporting ATPase subunit alpha-1	no	no	2	0.012614	107.74	1	2743800	2743800
DAIQTGVDNPGHPYIM	AELRAKCTPSGFTLDDAIQTGVDNPGHPYI	AIQTGVDNPGHPYIMTVGAVAGDEESYDVF	D	D	A	I	M	T	1	0	1	2	0	1	0	2	1	2	0	0	1	0	2	0	1	0	1	1	0	0	16		1726.8	Q04447	Q04447	55	70	Ckb	Creatine kinase B-type	yes	yes	2	8.7788e-24	290.66	1	864330	864330
DDEPLGRVSF	______________________________	FDITADDEPLGRVSFELFADKVPKTAENFR	A	D	D	S	F	E	0	1	0	2	0	0	1	1	0	0	1	0	0	1	1	1	0	0	0	1	0	0	10		1133.54	P17742	P17742	13	22	Ppia	Peptidyl-prolyl cis-trans isomerase A;Peptidyl-prolyl cis-trans isomerase A, N-terminally processed	yes	yes	2	6.4844e-07	195.17	1	7140300	7140300
DDIKKVVKQASEGPLKGIL	SVVDLTCRLEKPAKYDDIKKVVKQASEGPL	KVVKQASEGPLKGILGYTEDQVVSCDFNSN	Y	D	D	I	L	G	1	0	0	2	0	1	1	2	0	2	2	4	0	0	1	1	0	0	0	2	0	0	19		2037.18	P16858	P16858	254	272	Gapdh	Glyceraldehyde-3-phosphate dehydrogenase	yes	yes	4	0.017216	91.589	1	1214200	1214200
DGTEGLVRGQKVLDSGAPIKIPVGPETL	VAQHLGESTVRTIAMDGTEGLVRGQKVLDS	DSGAPIKIPVGPETLGRIMNVIGEPIDERG	M	D	G	T	L	G	1	1	0	2	0	1	2	5	0	2	3	2	0	0	3	1	2	0	0	3	0	0	28		2845.55	P56480	P56480	114	141	Atp5b	ATP synthase subunit beta, mitochondrial	yes	yes	3;4	1.2153e-20	242.94	2	2997500	2997500
DHKFDLM	MLSNTTAIAEAWARLDHKFDLMYAKRAFVH	IAEAWARLDHKFDLMYAKRAFVHWYVGEGM	L	D	H	L	M	Y	0	0	0	2	0	0	0	0	1	0	1	1	1	1	0	0	0	0	0	0	0	0	7		904.411	P68373;P68369;P05213;P05214;Q9JJZ2;Q3UX10	P68373	392	398	Tuba1c;Tuba1a;Tuba1b;Tuba3a;Tuba8;Tubal3	Tubulin alpha-1C chain;Tubulin alpha-1A chain;Tubulin alpha-1B chain;Tubulin alpha-3 chain;Tubulin alpha-8 chain;Tubulin alpha chain-like 3	no	no	2	0.020761	103.91	1	13701000	13701000
DLGPPVNVPQVSSM	VIPSQGDLLGDLLNLDLGPPVNVPQVSSMQ	LDLGPPVNVPQVSSMQMGAVDLLGGGLDSL	L	D	L	S	M	Q	0	0	1	1	0	1	0	1	0	0	1	0	1	0	3	2	0	0	0	3	0	0	14		1438.71	Q9DBG3	Q9DBG3	635	648	Ap2b1	AP-2 complex subunit beta	yes	yes	2	0.035406	76.326	1	804820	804820
DLLRPDVVL	EEKRECFGACLFTCYDLLRPDVVLETAWRH	CLFTCYDLLRPDVVLETAWRHNIMDFAMPY	Y	D	L	V	L	E	0	1	0	2	0	0	0	0	0	0	3	0	0	0	1	0	0	0	0	2	0	0	9		1038.61	Q68FD5	Q68FD5	1575	1583	Cltc	Clathrin heavy chain 1	yes	yes	2	0.041803	60.019	1	0	0
DRANNKVGLAPVA	WILGDVFIRQYYTVFDRANNKVGLAPVA__	VFDRANNKVGLAPVA_______________	F	D	R	V	A	-	3	1	2	1	0	0	0	1	0	0	1	1	0	0	1	0	0	0	0	2	0	0	13		1323.73	P00791	P00791	373	385			yes	yes	2	0.016383	97.734	1	19473000	19473000
DRGFDPSSPVL	MGEGPDKARSQLLILDRGFDPSSPVLHELT	LLILDRGFDPSSPVLHELTFQAMSYDLLPI	L	D	R	V	L	H	0	1	0	2	0	0	0	1	0	0	1	0	0	1	2	2	0	0	0	1	0	0	11		1188.58	O08599	O08599	234	244	Stxbp1	Syntaxin-binding protein 1	yes	yes	2	0.026489	85.676	1	1601800	1601800
DRIRKLADQCTGL	RGHYTIGKEIIDLVLDRIRKLADQCTGLQG	VLDRIRKLADQCTGLQGFLVFHSFGGGTGS	L	D	R	G	L	Q	1	2	0	2	1	1	0	1	0	1	2	1	0	0	0	0	1	0	0	0	0	0	13		1487.79	P68373;P68369;P05213	P68373	120	132	Tuba1c;Tuba1a;Tuba1b	Tubulin alpha-1C chain;Tubulin alpha-1A chain;Tubulin alpha-1B chain	yes	no	2	0.023645	110.08	1	4297600	4297600
DSGAPIKIPVGPETL	AMDGTEGLVRGQKVLDSGAPIKIPVGPETL	DSGAPIKIPVGPETLGRIMNVIGEPIDERG	L	D	S	T	L	G	1	0	0	1	0	0	1	2	0	2	1	1	0	0	3	1	1	0	0	1	0	0	15		1492.81	P56480	P56480	127	141	Atp5b	ATP synthase subunit beta, mitochondrial	yes	yes	2	6.709e-07	180.24	1	1518000	1518000
DSGDGVTHTVPIYE	VLSLYASGRTTGIVMDSGDGVTHTVPIYEG	MDSGDGVTHTVPIYEGYALPHAILRLDLAG	M	D	S	Y	E	G	0	0	0	2	0	0	1	2	1	1	0	0	0	0	1	1	2	0	1	2	0	0	14		1488.67	P63260;P60710;Q8BFZ3	P63260	154	167	Actg1;Actb;Actbl2	Actin, cytoplasmic 2;Actin, cytoplasmic 2, N-terminally processed;Actin, cytoplasmic 1;Actin, cytoplasmic 1, N-terminally processed;Beta-actin-like protein 2	yes	no	2	0.002771	112.71	1	1417500	1417500
DSGDGVTHTVPIYEG	VLSLYASGRTTGIVMDSGDGVTHTVPIYEG	DSGDGVTHTVPIYEGYALPHAILRLDLAGR	M	D	S	E	G	Y	0	0	0	2	0	0	1	3	1	1	0	0	0	0	1	1	2	0	1	2	0	0	15		1545.69	P63260;P60710;Q8BFZ3	P63260	154	168	Actg1;Actb;Actbl2	Actin, cytoplasmic 2;Actin, cytoplasmic 2, N-terminally processed;Actin, cytoplasmic 1;Actin, cytoplasmic 1, N-terminally processed;Beta-actin-like protein 2	yes	no	2	1.8464e-06	154.84	1	9051000	9051000
DSVRSGPFGQL	YVPRAALVDLEPGTMDSVRSGPFGQLFRPD	PGTMDSVRSGPFGQLFRPDNFIFGQTGAGN	M	D	S	Q	L	F	0	1	0	1	0	1	0	2	0	0	1	0	0	1	1	2	0	0	0	1	0	0	11		1161.58	Q922F4	Q922F4	74	84	Tubb6	Tubulin beta-6 chain	yes	yes	2	0.019023	94.692	1	3014400	3014400
DSVRSGPFGQLF	YVPRAALVDLEPGTMDSVRSGPFGQLFRPD	GTMDSVRSGPFGQLFRPDNFIFGQTGAGNN	M	D	S	L	F	R	0	1	0	1	0	1	0	2	0	0	1	0	0	2	1	2	0	0	0	1	0	0	12		1308.65	Q922F4	Q922F4	74	85	Tubb6	Tubulin beta-6 chain	yes	yes	2	0.00047184	145.91	1	8548700	8548700
DSVRSGPFGQLFRPDN	YVPRAALVDLEPGTMDSVRSGPFGQLFRPD	SVRSGPFGQLFRPDNFIFGQTGAGNNWAKG	M	D	S	D	N	F	0	2	1	2	0	1	0	2	0	0	1	0	0	2	2	2	0	0	0	1	0	0	16		1790.87	Q922F4	Q922F4	74	89	Tubb6	Tubulin beta-6 chain	yes	yes	2;3	1.0033e-16	237.3	2	9518800	9518800
DSVRSGPFGQLFRPDNF	YVPRAALVDLEPGTMDSVRSGPFGQLFRPD	VRSGPFGQLFRPDNFIFGQTGAGNNWAKGH	M	D	S	N	F	I	0	2	1	2	0	1	0	2	0	0	1	0	0	3	2	2	0	0	0	1	0	0	17		1937.94	Q922F4	Q922F4	74	90	Tubb6	Tubulin beta-6 chain	yes	yes	2	6.817e-17	235.11	1	7935500	7935500
DTAKGMLPDPKNTHIF	VQGIIIYRAAYFGIYDTAKGMLPDPKNTHI	TAKGMLPDPKNTHIFISWMIAQSVTAVAGL	Y	D	T	I	F	I	1	0	1	2	0	0	0	1	1	1	1	2	1	1	2	0	2	0	0	0	0	0	16		1783.89	P51881	P51881	196	211	Slc25a5	ADP/ATP translocase 2;ADP/ATP translocase 2, N-terminally processed	yes	yes	3	0.019754	91.657	1	4269400	4269400
DTAKGMLPDPKNVHIIV	VQGIIIYRAAYFGVYDTAKGMLPDPKNVHI	AKGMLPDPKNVHIIVSWMIAQSVTAVAGLV	Y	D	T	I	V	S	1	0	1	2	0	0	0	1	1	2	1	2	1	0	2	0	1	0	0	2	0	0	17		1847	P48962	P48962	196	212	Slc25a4	ADP/ATP translocase 1	yes	yes	4	0.02373	85.576	1	4385900	4385900
DTILPPTRPTDKPLRLPLQD	RKEGNASGVSLLEALDTILPPTRPTDKPLR	PTRPTDKPLRLPLQDVYKIGGIGTVPVGRV	L	D	T	Q	D	V	0	2	0	3	0	1	0	0	0	1	4	1	0	0	5	0	3	0	0	0	0	0	20		2285.27	P62631	P62631	233	252	Eef1a2	Elongation factor 1-alpha 2	yes	yes	3	0.015955	91.637	1	1186500	1186500
DTILPPTRPTDKPLRLPLQDV	RKEGNASGVSLLEALDTILPPTRPTDKPLR	TRPTDKPLRLPLQDVYKIGGIGTVPVGRVE	L	D	T	D	V	Y	0	2	0	3	0	1	0	0	0	1	4	1	0	0	5	0	3	0	0	1	0	0	21		2384.34	P62631	P62631	233	253	Eef1a2	Elongation factor 1-alpha 2	yes	yes	4	0.038106	71.073	1	2098000	2098000
DTVLKYLPGPLQD	AGCGDEEEEEEESILDTVLKYLPGPLQDMF	ILDTVLKYLPGPLQDMFKK___________	L	D	T	Q	D	M	0	0	0	2	0	1	0	1	0	0	3	1	0	0	2	0	1	0	1	1	0	0	13		1457.78	P84086	P84086	118	130	Cplx2	Complexin-2	yes	yes	2	3.0375e-06	180.18	1	1196200	1196200
DTVLKYLPGPLQDM	AGCGDEEEEEEESILDTVLKYLPGPLQDMF	LDTVLKYLPGPLQDMFKK____________	L	D	T	D	M	F	0	0	0	2	0	1	0	1	0	0	3	1	1	0	2	0	1	0	1	1	0	0	14		1588.82	P84086	P84086	118	131	Cplx2	Complexin-2	yes	yes	2	8.4091e-11	206.69	1	1449200	1449200
DVARGVQKILQD	TSRIMDPNIVGNEHYDVARGVQKILQDYKS	EHYDVARGVQKILQDYKSLQDIIAILGMDE	Y	D	V	Q	D	Y	1	1	0	2	0	2	0	1	0	1	1	1	0	0	0	0	0	0	0	2	0	0	12		1340.74	P56480	P56480	419	430	Atp5b	ATP synthase subunit beta, mitochondrial	yes	yes	2	0.031422	80.245	1	2917400	2917400
DVLDKHLIPAANTGE	QMVETELKLICCDILDVLDKHLIPAANTGE	DVLDKHLIPAANTGESKVFYYKMKGDYHRY	L	D	V	G	E	S	2	0	1	2	0	0	1	1	1	1	2	1	0	0	1	0	1	0	0	1	0	0	15		1591.82	P62259	P62259	102	116	Ywhae	14-3-3 protein epsilon	yes	yes	2;3	0.00028667	167.22	2	2166600	2166600
DVLDKHLIPAANTGESKVFY	QMVETELKLICCDILDVLDKHLIPAANTGE	HLIPAANTGESKVFYYKMKGDYHRYLAEFA	L	D	V	F	Y	Y	2	0	1	2	0	0	1	1	1	1	2	2	0	1	1	1	1	0	1	2	0	0	20		2216.15	P62259	P62259	102	121	Ywhae	14-3-3 protein epsilon	yes	yes	3	0.00042557	114.63	1	1982300	1982300
DWSHNFTNM	LYREGSSIGAIDSRLDWSHNFTNMLGYTDP	AIDSRLDWSHNFTNMLGYTDPQFTELMRLY	L	D	W	N	M	L	0	0	2	1	0	0	0	0	1	0	0	0	1	1	0	1	1	1	0	0	0	0	9		1150.45	Q9CZU6	Q9CZU6	235	243	Cs	Citrate synthase, mitochondrial	yes	yes	2	0.0047311	118.41	1	1417600	1417600
DWVPYINGKF	GAVGLVWATDWRLILDWVPYINGKFKKDD_	WRLILDWVPYINGKFKKDD___________	L	D	W	K	F	K	0	0	1	1	0	0	0	1	0	1	0	1	0	1	1	0	0	1	1	1	0	0	10		1237.61	Q9CPX8	Q9CPX8	43	52	Uqcr11	Cytochrome b-c1 complex subunit 10	yes	yes	2	0.01224	103.56	1	1806700	1806700
EAKNLKKMDVGGLSDPYVKIHL	LRYVPTAGKLTVVILEAKNLKKMDVGGLSD	MDVGGLSDPYVKIHLMQNGKRLKKKKTTIK	L	E	A	H	L	M	1	0	1	2	0	0	1	2	1	1	3	4	1	0	1	1	0	0	1	2	0	0	22		2454.33	P46096;P46097	P46096	295	316	Syt1;Syt2	Synaptotagmin-1;Synaptotagmin-2	yes	no	4;5	0.00020616	126.51	2	5420900	5420900
EDLEPFKMTPFSA	QGIWKPRKIPNPDFFEDLEPFKMTPFSAIG	FFEDLEPFKMTPFSAIGLELWSMTSDIFFD	F	E	D	S	A	I	1	0	0	1	0	0	2	0	0	0	1	1	1	2	2	1	1	0	0	0	0	0	13		1510.7	P35564	P35564	410	422	Canx	Calnexin	yes	yes	2	3.243e-06	179.19	1	639710	639710
EELGNHKAFKKELRHFISGDEPKEKLEL	KKSSETLRKAGQVFLEELGNHKAFKKELRH	RHFISGDEPKEKLELVSYFGKRPPGVLHCT	L	E	E	E	L	V	1	1	1	1	0	0	6	2	2	1	4	5	0	2	1	1	0	0	0	0	0	0	28		3320.75	P16330	P16330	210	237	Cnp	2,3-cyclic-nucleotide 3-phosphodiesterase	yes	yes	5	1.4877e-08	160.43	1	5072000	5072000
EEQQRILDL	GAIAQVHAENGDIIAEEQQRILDLGITGPE	NGDIIAEEQQRILDLGITGPEGHVLSRPEE	A	E	E	D	L	G	0	1	0	1	0	2	2	0	0	1	2	0	0	0	0	0	0	0	0	0	0	0	9		1142.59	O08553	O08553	207	215	Dpysl2	Dihydropyrimidinase-related protein 2	yes	yes	2	0.022467	93.162	1	2319200	2319200
EIKTDPSIMGGM	TVLKSFLSPNQILKLEIKTDPSIMGGMIVR	LKLEIKTDPSIMGGMIVRIGEKYVDMSAKS	L	E	I	G	M	I	0	0	0	1	0	0	1	2	0	2	0	1	2	0	1	1	1	0	0	0	0	0	12		1277.6	Q9DB20	Q9DB20	174	185	Atp5o	ATP synthase subunit O, mitochondrial	yes	yes	2	0.02523	82.645	1	424590	424590
EKAGAHLKGGAKRVIISAPSADAPMF	GAEYVVESTGVFTTMEKAGAHLKGGAKRVI	KRVIISAPSADAPMFVMGVNHEKYDNSLKI	M	E	K	M	F	V	6	1	0	1	0	0	1	3	1	2	1	3	1	1	2	2	0	0	0	1	0	0	26		2621.41	P16858	P16858	104	129	Gapdh	Glyceraldehyde-3-phosphate dehydrogenase	yes	yes	4	0.017226	76.417	1	1001400	1001400
EKFLIPNASQPESKVFY	ETELRDICNDVLSLLEKFLIPNASQPESKV	FLIPNASQPESKVFYLKMKGDYYRYLAEVA	L	E	K	F	Y	L	1	0	1	0	0	1	2	0	0	1	1	2	0	2	2	2	0	0	1	1	0	0	17		1996.03	P63101	P63101	102	118	Ywhaz	14-3-3 protein zeta/delta	yes	yes	3	0.00052997	126.25	1	2076700	2076700
EKSYELPDGQVIT	DFEQEMATAASSSSLEKSYELPDGQVITIG	SLEKSYELPDGQVITIGNERFRCPEALFQP	L	E	K	I	T	I	0	0	0	1	0	1	2	1	0	1	1	1	0	0	1	1	1	0	1	1	0	0	13		1477.73	P63260;P60710;P63268;P68134;P68033;P62737	P63260	237	249	Actg1;Actb;Actg2;Acta1;Actc1;Acta2	Actin, cytoplasmic 2;Actin, cytoplasmic 2, N-terminally processed;Actin, cytoplasmic 1;Actin, cytoplasmic 1, N-terminally processed;Actin, gamma-enteric smooth muscle;Actin, alpha skeletal muscle;Actin, alpha cardiac muscle 1;Actin, aortic smooth muscle	yes	no	2	0.041848	66.663	1	1012700	1012700
ELNLPTGIPIVY	GIVKHLEGLSEEAIMELNLPTGIPIVYELD	AIMELNLPTGIPIVYELDKNLKPIKPMQFL	M	E	L	V	Y	E	0	0	1	0	0	0	1	1	0	2	2	0	0	0	2	0	1	0	1	1	0	0	12		1327.74	Q9DBJ1;O70250	Q9DBJ1	207	218	Pgam1;Pgam2	Phosphoglycerate mutase 1;Phosphoglycerate mutase 2	yes	no	2	0.0080428	95.502	1	0	0
ELNLPTGIPIVYE	GIVKHLEGLSEEAIMELNLPTGIPIVYELD	IMELNLPTGIPIVYELDKNLKPIKPMQFLG	M	E	L	Y	E	L	0	0	1	0	0	0	2	1	0	2	2	0	0	0	2	0	1	0	1	1	0	0	13		1456.78	Q9DBJ1;O70250	Q9DBJ1	207	219	Pgam1;Pgam2	Phosphoglycerate mutase 1;Phosphoglycerate mutase 2	yes	no	2	0.01829	95.573	1	179370	179370
ENVKEKWVPEITHHCPKTPFL	DVFLVCFSVVSPSSFENVKEKWVPEITHHC	WVPEITHHCPKTPFLLVGTQIDLRDDPSTI	F	E	N	F	L	L	0	0	1	0	1	0	3	0	2	1	1	3	0	1	3	0	2	1	0	2	0	0	21		2531.3	P60766	P60766	91	111	Cdc42	Cell division control protein 42 homolog	yes	yes	4	0.00013753	139.26	1	1911300	1911300
EQLSPFPFDL	RKARNMEEEVAITRIEQLSPFPFDLLLKEA	AITRIEQLSPFPFDLLLKEAQKYPNAELAW	I	E	Q	D	L	L	0	0	0	1	0	1	1	0	0	0	2	0	0	2	2	1	0	0	0	0	0	0	10		1191.58	Q60597	Q60597	931	940	Ogdh	2-oxoglutarate dehydrogenase, mitochondrial	yes	yes	2	0.0060957	107.57	1	118560	118560
ERIDKIWPKL	DFNRRIRNEKGEIEQERIDKIWPKLRVLAR	GEIEQERIDKIWPKLRVLARSSPTDKHTLV	Q	E	R	K	L	R	0	1	0	1	0	0	1	0	0	2	1	2	0	0	1	0	0	1	0	0	0	0	10		1296.76	G5E829;Q9R0K7	G5E829	753	762	Atp2b1;Atp2b2	Plasma membrane calcium-transporting ATPase 1;Plasma membrane calcium-transporting ATPase 2	yes	no	3	0.014556	100.69	1	477720	477720
ESPIPILPLPTPDAE	CIQQMTSKLTQDSRMESPIPILPLPTPDAE	ESPIPILPLPTPDAETEKLIRMKDEELRRM	M	E	S	A	E	T	1	0	0	1	0	0	2	0	0	2	2	0	0	0	5	1	1	0	0	0	0	0	15		1587.84	Q9Z2Q6	Q9Z2Q6	326	340	2023-09-05	Septin-5	yes	yes	2	0.01681	96.143	1	601400	601400
ESPIPILPLPTPDAET	CIQQMTSKLTQDSRMESPIPILPLPTPDAE	SPIPILPLPTPDAETEKLIRMKDEELRRMQ	M	E	S	E	T	E	1	0	0	1	0	0	2	0	0	2	2	0	0	0	5	1	2	0	0	0	0	0	16		1688.89	Q9Z2Q6	Q9Z2Q6	326	341	2023-09-05	Septin-5	yes	yes	2	0.00064934	125.48	1	854140	854140
EVLRNGVKVVRSLKPDF	LNLVAHANGGFSVDMEVLRNGVKVVRSLKP	LRNGVKVVRSLKPDFVLIRQHAFSMARNGD	M	E	V	D	F	V	0	2	1	1	0	0	1	1	0	0	2	2	0	1	1	1	0	0	0	4	0	0	17		1955.13	O88935	O88935	166	182	Syn1	Synapsin-1	yes	yes	3	0.030959	76.494	1	1282800	1282800
FADKVPKTAENF	ITADDEPLGRVSFELFADKVPKTAENFRAL	FELFADKVPKTAENFRALSTGEKGFGYKGS	L	F	A	N	F	R	2	0	1	1	0	0	1	0	0	0	0	2	0	2	1	0	1	0	0	1	0	0	12		1365.69	P17742	P17742	25	36	Ppia	Peptidyl-prolyl cis-trans isomerase A;Peptidyl-prolyl cis-trans isomerase A, N-terminally processed	yes	yes	2	0.021565	91.752	1	4128300	4128300
FAFKDKYKQIF	NLANVIRYFPTQALNFAFKDKYKQIFLGGV	QALNFAFKDKYKQIFLGGVDRHKQFWRYFA	N	F	A	I	F	L	1	0	0	1	0	1	0	0	0	1	0	3	0	3	0	0	0	0	1	0	0	0	11		1433.77	P48962;P51881	P48962	89	99	Slc25a4;Slc25a5	ADP/ATP translocase 1;ADP/ATP translocase 2;ADP/ATP translocase 2, N-terminally processed	no	no	2;3	0.00047422	125.97	2	3038800	3038800
FAKALESPERPFL	PQKAGGFLMKKELNYFAKALESPERPFLAI	NYFAKALESPERPFLAILGGAKVADKIQLI	Y	F	A	F	L	A	2	1	0	0	0	0	2	0	0	0	2	1	0	2	2	1	0	0	0	0	0	0	13		1503.81	P09411	P09411	197	209	Pgk1	Phosphoglycerate kinase 1	yes	yes	3	0.0010925	127.71	1	3959500	3959500
FAPIHAEAPEF	IGEPIDERGPIKTKQFAPIHAEAPEFIEMS	KTKQFAPIHAEAPEFIEMSVEQEILVTGIK	Q	F	A	E	F	I	3	0	0	0	0	0	2	0	1	1	0	0	0	2	2	0	0	0	0	0	0	0	11		1227.59	P56480	P56480	163	173	Atp5b	ATP synthase subunit beta, mitochondrial	yes	yes	2	0.0024094	118.32	1	4212200	4212200
FDISKKEMQPTHPIRLGL	RKQTIENSQGAYQEAFDISKKEMQPTHPIR	SKKEMQPTHPIRLGLALNFSVFYYEILNNP	A	F	D	G	L	A	0	1	0	1	0	1	1	1	1	2	2	2	1	1	2	1	1	0	0	0	0	0	18		2109.14	P68254	P68254	153	170	Ywhaq	14-3-3 protein theta	yes	yes	4	0.012606	98.796	1	1819700	1819700
FDITADDEPLGRVSFEL	______________________________	ITADDEPLGRVSFELFADKVPKTAENFRAL	F	F	D	E	L	F	1	1	0	3	0	0	2	1	0	1	2	0	0	2	1	1	1	0	0	1	0	0	17		1922.93	P17742	P17742	8	24	Ppia	Peptidyl-prolyl cis-trans isomerase A;Peptidyl-prolyl cis-trans isomerase A, N-terminally processed	yes	yes	2	2.9098e-06	173.06	1	141860	141860
FDKPVSPLL	MTEAEQQQLIDDHFLFDKPVSPLLLASGMA	IDDHFLFDKPVSPLLLASGMARDWPDARGI	L	F	D	L	L	L	0	0	0	1	0	0	0	0	0	0	2	1	0	1	2	1	0	0	0	1	0	0	9		1014.58	Q04447;P07310;Q6P8J7;P30275	Q04447	194	202	Ckb;Ckm;Ckmt2;Ckmt1	Creatine kinase B-type;Creatine kinase M-type;Creatine kinase S-type, mitochondrial;Creatine kinase U-type, mitochondrial	no	no	2	0.0016727	144.09	1	11432000	11432000
FDLYPHVVGF	ILKTFLRELPEPLLTFDLYPHVVGFLNIDE	EPLLTFDLYPHVVGFLNIDESQRVEVTQQV	T	F	D	G	F	L	0	0	0	1	0	0	0	1	1	0	1	0	0	2	1	0	0	0	1	2	0	0	10		1192.59	Q5FWK3	Q5FWK3	332	341	Arhgap1	Rho GTPase-activating protein 1	yes	yes	2	0.0099433	106.42	1	308080	308080
FEDLEPFKMTPFSA	YQGIWKPRKIPNPDFFEDLEPFKMTPFSAI	FFEDLEPFKMTPFSAIGLELWSMTSDIFFD	F	F	E	S	A	I	1	0	0	1	0	0	2	0	0	0	1	1	1	3	2	1	1	0	0	0	0	0	14		1657.77	P35564	P35564	409	422	Canx	Calnexin	yes	yes	2	0.00010291	151.26	1	1221000	1221000
FEGPPFKFKF	PYRLATGSDDNCAAFFEGPPFKFKFTIGDH	NCAAFFEGPPFKFKFTIGDHSRFVNCVRFS	F	F	E	K	F	T	0	0	0	0	0	0	1	1	0	0	0	2	0	4	2	0	0	0	0	0	0	0	10		1242.64	O88342	O88342	174	183	Wdr1	WD repeat-containing protein 1	yes	yes	3	0.012812	91.095	1	0	0
FEISKKEMQPTHPIRL	KKGIVDQSQQAYQEAFEISKKEMQPTHPIR	EISKKEMQPTHPIRLGLALNFSVFYYEILN	A	F	E	R	L	G	0	1	0	0	0	1	2	0	1	2	1	2	1	1	2	1	1	0	0	0	0	0	16		1953.05	P63101;Q9CQV8	P63101	153	168	Ywhaz;Ywhab	14-3-3 protein zeta/delta;14-3-3 protein beta/alpha;14-3-3 protein beta/alpha, N-terminally processed	yes	no	3;4	0.021236	89.866	2	4330900	4330900
FEISKKEMQPTHPIRLGL	KKGIVDQSQQAYQEAFEISKKEMQPTHPIR	SKKEMQPTHPIRLGLALNFSVFYYEILNSP	A	F	E	G	L	A	0	1	0	0	0	1	2	1	1	2	2	2	1	1	2	1	1	0	0	0	0	0	18		2123.16	P63101;Q9CQV8	P63101	153	170	Ywhaz;Ywhab	14-3-3 protein zeta/delta;14-3-3 protein beta/alpha;14-3-3 protein beta/alpha, N-terminally processed	yes	no	3;4;5	3.923e-07	174.02	3	22529000	22529000
FEITDEPPYIHF	SVVYVCGKGDSSIRYFEITDEPPYIHFLNT	IRYFEITDEPPYIHFLNTFTSKEPQRGMGS	Y	F	E	H	F	L	0	0	0	1	0	0	2	0	1	2	0	0	0	2	2	0	1	0	1	0	0	0	12		1506.7	Q9WUM3	Q9WUM3	295	306	Coro1b	Coronin-1B	yes	yes	2	0.0022667	114.28	1	52329	52329
FEWLKNLNHVSY	IPDLYLNAGGVTVSYFEWLKNLNHVSYGRL	VSYFEWLKNLNHVSYGRLTFKYERDSNYHL	Y	F	E	S	Y	G	0	0	2	0	0	0	1	0	1	0	2	1	0	1	0	1	0	1	1	1	0	0	12		1548.77	P26443	P26443	440	451	Glud1	Glutamate dehydrogenase 1, mitochondrial	yes	yes	3	0.00055843	144.27	1	1773800	1773800
FEYPFRLHQ	ECANKTESALNIEVEFEYPFRLHQVYFDAP	LNIEVEFEYPFRLHQVYFDAPSCVKGGTTK	E	F	E	H	Q	V	0	1	0	0	0	1	1	0	1	0	1	0	0	2	1	0	0	0	1	0	0	0	9		1235.61	Q62277	Q62277	71	79	Syp	Synaptophysin	yes	yes	2;3	0.011004	92.439	2	8032000	8032000
FEYPFRLHQVY	ECANKTESALNIEVEFEYPFRLHQVYFDAP	IEVEFEYPFRLHQVYFDAPSCVKGGTTKIF	E	F	E	V	Y	F	0	1	0	0	0	1	1	0	1	0	1	0	0	2	1	0	0	0	2	1	0	0	11		1497.74	Q62277	Q62277	71	81	Syp	Synaptophysin	yes	yes	2;3	0.0018919	134.25	2	5006900	5006900
FFNGKELNKSINPDEA	GGSTRIPKIQKLLQDFFNGKELNKSINPDE	FNGKELNKSINPDEAVAYGAAVQAAILSGD	D	F	F	E	A	V	1	0	3	1	0	0	2	1	0	1	1	2	0	2	1	1	0	0	0	0	0	0	16		1821.89	P63017;P17156	P63017	353	368	Hspa8;Hspa2	Heat shock cognate 71 kDa protein;Heat shock-related 70 kDa protein 2	yes	no	3	0.028989	78.69	1	1796000	1796000
FGGAGVGKTVL	VDLLAPYAKGGKIGLFGGAGVGKTVLIMEL	KIGLFGGAGVGKTVLIMELINNVAKAHGGY	L	F	G	V	L	I	1	0	0	0	0	0	0	4	0	0	1	1	0	1	0	0	1	0	0	2	0	0	11		1004.57	P56480	P56480	205	215	Atp5b	ATP synthase subunit beta, mitochondrial	yes	yes	2	0.016331	86.882	1	0	0
FGLSPFEPWTTKD	PYPLPLFVYSWIGKLFGLSPFEPWTTKDKV	KLFGLSPFEPWTTKDKVERIHISDVMPTDL	L	F	G	K	D	K	0	0	0	1	0	0	1	1	0	0	1	1	0	2	2	1	2	1	0	0	0	0	13		1523.73	Q9DC69	Q9DC69	305	317	Ndufa9	NADH dehydrogenase [ubiquinone] 1 alpha subcomplex subunit 9, mitochondrial	yes	yes	2	5.7846e-09	196.11	1	1538200	1538200
FGPVPDTARY	ENGKANSVRNAVTQEFGPVPDTARYYKKHG	AVTQEFGPVPDTARYYKKHGIRWVVIGDEN	E	F	G	R	Y	Y	1	1	0	1	0	0	0	1	0	0	0	0	0	1	2	0	1	0	1	1	0	0	10		1121.55	Q99KI0	Q99KI0	640	649	Aco2	Aconitate hydratase, mitochondrial	yes	yes	2	0.034933	75.378	1	3537800	3537800
FGTGFPHMLF	YTPKSSRHHHTDGAYFGTGFPHMLFMVHPE	TDGAYFGTGFPHMLFMVHPEYRPKRPANQF	Y	F	G	L	F	M	0	0	0	0	0	0	0	2	1	0	1	0	1	3	1	0	1	0	0	0	0	0	10		1152.54	P67871	P67871	159	168	Csnk2b	Casein kinase II subunit beta	yes	yes	2	5.8136e-05	171.08	1	299970	299970
FGTIGIGTPAQD	LIGDEPLENYLDTEYFGTIGIGTPAQDFTV	TEYFGTIGIGTPAQDFTVIFDTGSSNLWVP	Y	F	G	Q	D	F	1	0	0	1	0	1	0	3	0	2	0	0	0	1	1	0	2	0	0	0	0	0	12		1175.58	P00791	P00791	74	85			yes	yes	2	0.0010118	135.63	1	1879300	1879300
FGTIGIGTPAQDF	LIGDEPLENYLDTEYFGTIGIGTPAQDFTV	EYFGTIGIGTPAQDFTVIFDTGSSNLWVPS	Y	F	G	D	F	T	1	0	0	1	0	1	0	3	0	2	0	0	0	2	1	0	2	0	0	0	0	0	13		1322.65	P00791	P00791	74	86			yes	yes	2	4.728e-07	192.5	1	2481500	2481500
FHVVIAGPQDSPFEGGTF	VPGIKAEPDESNARYFHVVIAGPQDSPFEG	VIAGPQDSPFEGGTFKLELFLPEEYPMAAP	Y	F	H	T	F	K	1	0	0	1	0	1	1	3	1	1	0	0	0	3	2	1	1	0	0	2	0	0	18		1903.91	P61089	P61089	35	52	Ube2n	Ubiquitin-conjugating enzyme E2 N	yes	yes	2	2.1478e-11	205.8	1	658200	658200
FIIANIPLPLGT	YTLTSNIPEITPFLIFIIANIPLPLGTVTI	FLIFIIANIPLPLGTVTILCIDLGTDMVPA	I	F	I	G	T	V	1	0	1	0	0	0	0	1	0	3	2	0	0	1	2	0	1	0	0	0	0	0	12		1267.75	Q6PIE5;Q8VDN2	Q8VDN2	793	804	Atp1a2;Atp1a1	Sodium/potassium-transporting ATPase subunit alpha-2;Sodium/potassium-transporting ATPase subunit alpha-1	no	no	2	0.011448	103.56	1	52556	52556
FIIPNIVKYSPHCKL	ESRLNLVQRNVNIFKFIIPNIVKYSPHCKL	FIIPNIVKYSPHCKLLIVSNPVDILTYVAW	K	F	I	K	L	L	0	0	1	0	1	0	0	0	1	3	1	2	0	1	2	1	0	0	1	1	0	0	15		1770.99	P06151	P06151	119	133	Ldha	L-lactate dehydrogenase A chain	yes	yes	4	0.020323	92.063	1	567650	567650
FKEAFSL	______________________________	LTEEQIAEFKEAFSLFDKDGDGTITTKELG	E	F	K	S	L	F	1	0	0	0	0	0	1	0	0	0	1	1	0	2	0	1	0	0	0	0	0	0	7		840.438	P0DP28;P0DP27;P0DP26;Q9D6P8;P09541	P0DP28	13	19	Calml3;Myl4	Calmodulin-like protein 3;Myosin light chain 4	yes	no	2	0.0033001	149.48	1	5025700	5025700
FKFIIPQIV	EGESRLNLVQRNVNVFKFIIPQIVKYSPDC	QRNVNVFKFIIPQIVKYSPDCTIIVVSNPV	V	F	K	I	V	K	0	0	0	0	0	1	0	0	0	3	0	1	0	2	1	0	0	0	0	1	0	0	9		1103.67	P16125	P16125	118	126	Ldhb	L-lactate dehydrogenase B chain	yes	yes	2	0.0096111	109.01	1	444730	444730
FKFIIPQIVKY	EGESRLNLVQRNVNVFKFIIPQIVKYSPDC	NVNVFKFIIPQIVKYSPDCTIIVVSNPVDI	V	F	K	K	Y	S	0	0	0	0	0	1	0	0	0	3	0	2	0	2	1	0	0	0	1	1	0	0	11		1394.83	P16125	P16125	118	128	Ldhb	L-lactate dehydrogenase B chain	yes	yes	3	0.0015798	130.94	1	343960	343960
FKFIIPQIVKYSPDCT	EGESRLNLVQRNVNVFKFIIPQIVKYSPDC	KFIIPQIVKYSPDCTIIVVSNPVDILTYVT	V	F	K	C	T	I	0	0	0	1	1	1	0	0	0	3	0	2	0	2	2	1	1	0	1	1	0	0	16		1898	P16125	P16125	118	133	Ldhb	L-lactate dehydrogenase B chain	yes	yes	3	0.011674	101.42	1	278830	278830
FKFIIPQIVKYSPDCTI	EGESRLNLVQRNVNVFKFIIPQIVKYSPDC	FIIPQIVKYSPDCTIIVVSNPVDILTYVTW	V	F	K	T	I	I	0	0	0	1	1	1	0	0	0	4	0	2	0	2	2	1	1	0	1	1	0	0	17		2011.09	P16125	P16125	118	134	Ldhb	L-lactate dehydrogenase B chain	yes	yes	3	0.015268	96.208	1	165630	165630
FKFLPFSF	LHWVEFQNKFYTGTGFKFLPFSFEHIREGK	KFYTGTGFKFLPFSFEHIREGKFDE_____	G	F	K	S	F	E	0	0	0	0	0	0	0	0	0	0	1	1	0	4	1	1	0	0	0	0	0	0	8		1031.55	Q9Z1G4	Q9Z1G4	822	829	Atp6v0a1	V-type proton ATPase 116 kDa subunit a isoform 1	yes	yes	2	0.0037492	135.84	1	127710	127710
FKFPFTF	NATTPHYVRCIKPNDFKFPFTFDEKRAVQQ	VRCIKPNDFKFPFTFDEKRAVQQLRACGVL	D	F	K	T	F	D	0	0	0	0	0	0	0	0	0	0	0	1	0	4	1	0	1	0	0	0	0	0	7		932.48	Q99104	Q99104	666	672	Myo5a	Unconventional myosin-Va	yes	yes	2	0.0008911	121.29	1	0	0
FKLSISAL	EYAQQEVVKRSYGKAFKLSISALFVTPKTA	KRSYGKAFKLSISALFVTPKTAGAQVVLTD	A	F	K	A	L	F	1	0	0	0	0	0	0	0	0	1	2	1	0	1	0	2	0	0	0	0	0	0	8		877.527	P16330	P16330	281	288	Cnp	2,3-cyclic-nucleotide 3-phosphodiesterase	yes	yes	2	0.00069761	159.04	1	2918800	2918800
FKQLQVVPLF	LDAKKRINLSKIDKYFKQLQVVPLFGDMQI	KIDKYFKQLQVVPLFGDMQIELARYIKTSA	Y	F	K	L	F	G	0	0	0	0	0	2	0	0	0	0	2	1	0	2	1	0	0	0	0	2	0	0	10		1217.72	Q7TMB8;Q5SQX6	Q7TMB8	299	308	Cyfip1;Cyfip2	Cytoplasmic FMR1-interacting protein 1;Cytoplasmic FMR1-interacting protein 2	yes	no	2	0.016478	98.299	1	428760	428760
FKSPDDPSRYITPDQL	VAASEFYRSGKYDLDFKSPDDPSRYITPDQ	KSPDDPSRYITPDQLADLYKSFVQNYPVVS	D	F	K	Q	L	A	0	1	0	3	0	1	0	0	0	1	1	1	0	1	3	2	1	0	1	0	0	0	16		1877.92	P17182	P17182	261	276	Eno1	Alpha-enolase	yes	yes	2;3	0.00027276	182.72	2	12466000	12466000
FKVPMNTVD	VYDFDRFSKHDIIGEFKVPMNTVDFGHVTE	HDIIGEFKVPMNTVDFGHVTEEWRDLQSAE	E	F	K	V	D	F	0	0	1	1	0	0	0	0	0	0	0	1	1	1	1	0	1	0	0	2	0	0	9		1049.52	P46096	P46096	243	251	Syt1	Synaptotagmin-1	yes	yes	2	0.037397	78.334	1	1506500	1506500
FKVPYSEL	VHRKTLNPVFNEQFTFKVPYSELGGKTLVM	VFNEQFTFKVPYSELGGKTLVMAVYDFDRF	T	F	K	E	L	G	0	0	0	0	0	0	1	0	0	0	1	1	0	1	1	1	0	0	1	1	0	0	8		981.517	P46096	P46096	212	219	Syt1	Synaptotagmin-1	yes	yes	2	0.0067478	116.88	1	2005600	2005600
FLIPIGKAKIERQGTHITV	YGVAFELPAEAQSKDFLIPIGKAKIERQGT	IGKAKIERQGTHITVVAHSRPVGHCLEAAA	D	F	L	T	V	V	1	1	0	0	0	1	1	2	1	4	1	2	0	1	1	0	2	0	0	1	0	0	19		2120.25	Q9D051	Q9D051	221	239	Pdhb	Pyruvate dehydrogenase E1 component subunit beta, mitochondrial	yes	yes	5	0.022943	83.758	1	1464100	1464100
FLIPVQTQHPIRKGLHHKILL	FYQLIHQGTKMIPCDFLIPVQTQHPIRKGL	TQHPIRKGLHHKILLANFLAQTEALMKGKL	D	F	L	L	L	A	0	1	0	0	0	2	0	1	3	3	4	2	0	1	2	0	1	0	0	1	0	0	21		2487.5	P06745	P06745	406	426	Gpi	Glucose-6-phosphate isomerase	yes	yes	5	0.022997	78.661	1	1603700	1603700
FLYPKTGVTGPYVL	GGKVRLGLIPEEFFQFLYPKTGVTGPYVLG	QFLYPKTGVTGPYVLGTGLSLYFLSKEIYV	Q	F	L	V	L	G	0	0	0	0	0	0	0	2	0	0	2	1	0	1	2	0	2	0	2	2	0	0	14		1553.85	Q9CQQ7	Q9CQQ7	66	79	Atp5f1	ATP synthase F(0) complex subunit B1, mitochondrial	yes	yes	2	0.00095532	123.01	1	1686500	1686500
FMPGFAPLTA	RKLAVNMVPFPRLHFFMPGFAPLTARGSQQ	PRLHFFMPGFAPLTARGSQQYRALTVPELT	F	F	M	T	A	R	2	0	0	0	0	0	0	1	0	0	1	0	1	2	2	0	1	0	0	0	0	0	10		1050.52	Q922F4;A2AQ07;Q9ERD7	Q922F4	266	275	Tubb6;Tubb1;Tubb3	Tubulin beta-6 chain;Tubulin beta-1 chain;Tubulin beta-3 chain	no	no	2	0.001856	133.7	1	2726300	2726300
FMPGFAPLTS	RKLAVNMVPFPRLHFFMPGFAPLTSRGSQQ	PRLHFFMPGFAPLTSRGSQQYRALTVPELT	F	F	M	T	S	R	1	0	0	0	0	0	0	1	0	0	1	0	1	2	2	1	1	0	0	0	0	0	10		1066.52	P68372;P99024;Q7TMM9;Q9CWF2;Q9D6F9	P68372	266	275	Tubb4b;Tubb5;Tubb2a;Tubb2b;Tubb4a	Tubulin beta-4B chain;Tubulin beta-5 chain;Tubulin beta-2A chain;Tubulin beta-2B chain;Tubulin beta-4A chain	no	no	2	0.0065799	105.12	1	1346700	1346700
FMPGFAPLTSRGSQQ	RKLAVNMVPFPRLHFFMPGFAPLTSRGSQQ	FMPGFAPLTSRGSQQYRALTVPELTQQMFD	F	F	M	Q	Q	Y	1	1	0	0	0	2	0	2	0	0	1	0	1	2	2	2	1	0	0	0	0	0	15		1622.79	P68372;P99024;Q7TMM9;Q9CWF2;Q9D6F9	P68372	266	280	Tubb4b;Tubb5;Tubb2a;Tubb2b;Tubb4a	Tubulin beta-4B chain;Tubulin beta-5 chain;Tubulin beta-2A chain;Tubulin beta-2B chain;Tubulin beta-4A chain	no	no	2;3	5.663e-11	210.95	2	43827000	43827000
FNCSPHPYWLPNF	AAVLKYENNVMNIRQFNCSPHPYWLPNFMD	RQFNCSPHPYWLPNFMDVFTWSLPFVGEKV	Q	F	N	N	F	M	0	0	2	0	1	0	0	0	1	0	1	0	0	2	3	1	0	1	1	0	0	0	13		1620.72	P63328;P48455;P48453	P48453	343	355	Ppp3ca;Ppp3cc;Ppp3cb	Serine/threonine-protein phosphatase 2B catalytic subunit alpha isoform;Serine/threonine-protein phosphatase 2B catalytic subunit gamma isoform;Serine/threonine-protein phosphatase 2B catalytic subunit beta isoform	no	no	2	0.0010878	127.83	1	741980	741980
FNLPEPAPPRPSL	PPHPQLNKSQSLTNAFNLPEPAPPRPSLSQ	NAFNLPEPAPPRPSLSQDEVKAETIRSLRK	A	F	N	S	L	S	1	1	1	0	0	0	1	0	0	0	2	0	0	1	5	1	0	0	0	0	0	0	13		1433.77	O88935	O88935	671	683	Syn1	Synapsin-1	yes	yes	2	0.00014938	151.1	1	5885500	5885500
FNSPYPKNYPPVVF	FPDELRPAVVHGVWYFNSPYPKNYPPVVFK	YFNSPYPKNYPPVVFKSRTQVVHESFQGRS	Y	F	N	V	F	K	0	0	2	0	0	0	0	0	0	0	0	1	0	2	4	1	0	0	2	2	0	0	14		1667.83	P20917	P20917	61	74	Mag	Myelin-associated glycoprotein	yes	yes	2	2.9253e-07	189.57	1	1965000	1965000
FNVPYPLPKIDL	ALEVAAKTLPFYKDYFNVPYPLPKIDLIAI	KDYFNVPYPLPKIDLIAIADFAAGAMENWG	Y	F	N	D	L	I	0	0	1	1	0	0	0	0	0	1	2	1	0	1	3	0	0	0	1	1	0	0	12		1414.79	Q11011	Q11011	297	308	Npepps	Puromycin-sensitive aminopeptidase	yes	yes	2	2.7205e-06	187.99	1	601690	601690
FPYGDASKF	GILNLEEFQQLYIKFFPYGDASKFAQHAFR	QLYIKFFPYGDASKFAQHAFRTFDKNGDGT	F	F	P	K	F	A	1	0	0	1	0	0	0	1	0	0	0	1	0	2	1	1	0	0	1	0	0	0	9		1030.48	Q8BGZ1;P62761;Q91X97;P84075;P62748	Q8BGZ1	56	64	Hpcal4;Vsnl1;Ncald;Hpca;Hpcal1	Hippocalcin-like protein 4;Visinin-like protein 1;Neurocalcin-delta;Neuron-specific calcium-binding protein hippocalcin;Hippocalcin-like protein 1	yes	no	2	0.027216	87.308	1	3125000	3125000
FQLTHSLGGGTGSGM	DVVRKEAESCDCLQGFQLTHSLGGGTGSGM	FQLTHSLGGGTGSGMGTLLISKIREEYPDR	G	F	Q	G	M	G	0	0	0	0	0	1	0	5	1	0	2	0	1	1	0	2	2	0	0	0	0	0	15		1448.67	P68372;P99024;Q7TMM9;Q9CWF2;Q922F4;Q9D6F9;Q9ERD7	P68372	133	147	Tubb4b;Tubb5;Tubb2a;Tubb2b;Tubb6;Tubb4a;Tubb3	Tubulin beta-4B chain;Tubulin beta-5 chain;Tubulin beta-2A chain;Tubulin beta-2B chain;Tubulin beta-6 chain;Tubulin beta-4A chain;Tubulin beta-3 chain	no	no	2	1.8577e-24	311.49	1	9485700	9485700
FQLTHSLGGGTGSGMG	DVVRKEAESCDCLQGFQLTHSLGGGTGSGM	QLTHSLGGGTGSGMGTLLISKIREEYPDRI	G	F	Q	M	G	T	0	0	0	0	0	1	0	6	1	0	2	0	1	1	0	2	2	0	0	0	0	0	16		1505.69	P68372;P99024;Q7TMM9;Q9CWF2;Q922F4;Q9D6F9;Q9ERD7	P68372	133	148	Tubb4b;Tubb5;Tubb2a;Tubb2b;Tubb6;Tubb4a;Tubb3	Tubulin beta-4B chain;Tubulin beta-5 chain;Tubulin beta-2A chain;Tubulin beta-2B chain;Tubulin beta-6 chain;Tubulin beta-4A chain;Tubulin beta-3 chain	no	no	2	4.1193e-32	329.77	1	2532700	2532700
FQLTHSLGGGTGSGMGTL	DVVRKEAESCDCLQGFQLTHSLGGGTGSGM	THSLGGGTGSGMGTLLISKIREEYPDRIMN	G	F	Q	T	L	L	0	0	0	0	0	1	0	6	1	0	3	0	1	1	0	2	3	0	0	0	0	0	18		1719.83	P68372;P99024;Q7TMM9;Q9CWF2;Q922F4;Q9D6F9;Q9ERD7	P68372	133	150	Tubb4b;Tubb5;Tubb2a;Tubb2b;Tubb6;Tubb4a;Tubb3	Tubulin beta-4B chain;Tubulin beta-5 chain;Tubulin beta-2A chain;Tubulin beta-2B chain;Tubulin beta-6 chain;Tubulin beta-4A chain;Tubulin beta-3 chain	no	no	2	1.0277e-68	461.32	2	46375000	46375000
FQLTHSLGGGTGSGMGTLL	DVVRKEAESCDCLQGFQLTHSLGGGTGSGM	HSLGGGTGSGMGTLLISKIREEYPDRIMNT	G	F	Q	L	L	I	0	0	0	0	0	1	0	6	1	0	4	0	1	1	0	2	3	0	0	0	0	0	19		1832.91	P68372;P99024;Q7TMM9;Q9CWF2;Q922F4;Q9D6F9;Q9ERD7	P68372	133	151	Tubb4b;Tubb5;Tubb2a;Tubb2b;Tubb6;Tubb4a;Tubb3	Tubulin beta-4B chain;Tubulin beta-5 chain;Tubulin beta-2A chain;Tubulin beta-2B chain;Tubulin beta-6 chain;Tubulin beta-4A chain;Tubulin beta-3 chain	no	no	2	1.5103e-35	409.75	2	8659500	8659500
FQMTFHL	KVCGSNLLSICKTAEFQMTFHLFIAAFVGA	LSICKTAEFQMTFHLFIAAFVGAAATLVSL	E	F	Q	H	L	F	0	0	0	0	0	1	0	0	1	0	1	0	1	2	0	0	1	0	0	0	0	0	7		922.437	P60202	P60202	233	239	Plp1	Myelin proteolipid protein	yes	yes	2	0.001142	174.64	2	5495200	5495200
FQTNLVPYPRIHF	ASLRFDGALNVDLTEFQTNLVPYPRIHFPL	TEFQTNLVPYPRIHFPLATYAPVISAEKAY	E	F	Q	H	F	P	0	1	1	0	0	1	0	0	1	1	1	0	0	2	2	0	1	0	1	1	0	0	13		1630.86	P68373;P68369;P05213;P05214;Q9JJZ2;Q3UX10	P68373	255	267	Tuba1c;Tuba1a;Tuba1b;Tuba3a;Tuba8;Tubal3	Tubulin alpha-1C chain;Tubulin alpha-1A chain;Tubulin alpha-1B chain;Tubulin alpha-3 chain;Tubulin alpha-8 chain;Tubulin alpha chain-like 3	no	no	2;3	3.5305e-06	212.82	2	18721000	18721000
FQTNLVPYPRIHFPITAL	ASLRFEGPLNVDLIEFQTNLVPYPRIHFPI	NLVPYPRIHFPITALAPIISAEKAYQEQLS	E	F	Q	A	L	A	1	1	1	0	0	1	0	0	1	2	2	0	0	2	3	0	2	0	1	1	0	0	18		2126.17	Q3UX10	Q3UX10	262	279	Tubal3	Tubulin alpha chain-like 3	yes	yes	3	0.0015022	113.29	1	245710	245710
FQTNLVPYPRIHFPLA	ASLRFDGALNVDLTEFQTNLVPYPRIHFPL	QTNLVPYPRIHFPLATYAPVISAEKAYHEQ	E	F	Q	L	A	T	1	1	1	0	0	1	0	0	1	1	2	0	0	2	3	0	1	0	1	1	0	0	16		1912.04	P68373;P68369;P05213;P05214	P68373	255	270	Tuba1c;Tuba1a;Tuba1b;Tuba3a	Tubulin alpha-1C chain;Tubulin alpha-1A chain;Tubulin alpha-1B chain;Tubulin alpha-3 chain	no	no	3	2.2368e-07	188.63	1	1026000	1026000
FQTNLVPYPRIHFPLAT	ASLRFDGALNVDLTEFQTNLVPYPRIHFPL	TNLVPYPRIHFPLATYAPVISAEKAYHEQL	E	F	Q	A	T	Y	1	1	1	0	0	1	0	0	1	1	2	0	0	2	3	0	2	0	1	1	0	0	17		2013.08	P68373;P68369;P05213;P05214	P68373	255	271	Tuba1c;Tuba1a;Tuba1b;Tuba3a	Tubulin alpha-1C chain;Tubulin alpha-1A chain;Tubulin alpha-1B chain;Tubulin alpha-3 chain	no	no	2;3	4.7967e-24	242.43	2	35722000	35722000
FQYDSTHGKFNGTVKAENGKL	AINDPFIDLNYMVYMFQYDSTHGKFNGTVK	HGKFNGTVKAENGKLVINGKPITIFQERDP	M	F	Q	K	L	V	1	0	2	1	0	1	1	3	1	0	1	3	0	2	0	1	2	0	1	1	0	0	21		2340.15	P16858	P16858	45	65	Gapdh	Glyceraldehyde-3-phosphate dehydrogenase	yes	yes	4	0.021097	81.665	1	17526000	17526000
FRDPFRKDPNKLVL	SEGSNSDMYLHPVAMFRDPFRKDPNKLVLC	MFRDPFRKDPNKLVLCEVFKYNRKPAETNL	M	F	R	V	L	C	0	2	1	2	0	0	0	0	0	0	2	2	0	2	2	0	0	0	0	1	0	0	14		1743.98	P15105	P15105	85	98	Glul	Glutamine synthetase	yes	yes	4	0.023584	89.507	1	5364000	5364000
FRIPWFQY	IGGVQQDTILAEGLHFRIPWFQYPIIYDIR	ILAEGLHFRIPWFQYPIIYDIRARPRKISS	H	F	R	Q	Y	P	0	1	0	0	0	1	0	0	0	1	0	0	0	2	1	0	0	1	1	0	0	0	8		1155.59	O35129	O35129	70	77	Phb2	Prohibitin-2	yes	yes	2	0.001605	149.4	1	214720	214720
FRKFLPLF	______________________________	______________________________	A	F	R	L	F	D	0	1	0	0	0	0	0	0	0	0	2	1	0	3	1	0	0	0	0	0	0	0	8		1066.63	Q64433	Q64433	6	13	Hspe1	10 kDa heat shock protein, mitochondrial	yes	yes	2	0.032233	95.793	1	1714300	1714300
FRLLGNM	LSELHCDKLHVDPENFRLLGNMIVIVLGHH	KLHVDPENFRLLGNMIVIVLGHHLGKDFTP	N	F	R	N	M	I	0	1	1	0	0	0	0	1	0	0	2	0	1	1	0	0	0	0	0	0	0	0	7		849.453	P02088	P02088	104	110	Hbb-b1	Hemoglobin subunit beta-1	yes	yes	2	0.0098448	117.7	1	10040000	10040000
FRLPRPPPPEM	LTALQWFIYDSVKVYFRLPRPPPPEMPESL	VKVYFRLPRPPPPEMPESLKKKLGLTE___	Y	F	R	E	M	P	0	2	0	0	0	0	1	0	0	0	1	0	1	1	5	0	0	0	0	0	0	0	11		1335.71	Q8VEM8	Q8VEM8	335	345	Slc25a3	Phosphate carrier protein, mitochondrial	yes	yes	2	0.042083	76.17	1	0	0
FRLPRPPPPEMPESLKKKLGLTE	LTALQWFIYDSVKVYFRLPRPPPPEMPESL	PEMPESLKKKLGLTE_______________	Y	F	R	T	E	-	0	2	0	0	0	0	3	1	0	0	4	3	1	1	6	1	1	0	0	0	0	0	23		2659.49	Q8VEM8	Q8VEM8	335	357	Slc25a3	Phosphate carrier protein, mitochondrial	yes	yes	5	0.021871	74.584	1	727690	727690
FRPWDVTKL	DMDTIEKSNLNRQFLFRPWDVTKLKSDTAA	LNRQFLFRPWDVTKLKSDTAAAAVRQMNPY	L	F	R	K	L	K	0	1	0	1	0	0	0	0	0	0	1	1	0	1	1	0	1	1	0	1	0	0	9		1160.63	Q02053	Q02053	519	527	Uba1	Ubiquitin-like modifier-activating enzyme 1	yes	yes	3	0.0009542	119.22	1	0	0
FRSTSGPGMPMNWPQF	EQAIRGADAQEDLRWFRSTSGPGMPMNWPQ	RSTSGPGMPMNWPQFEEWNPDLPHTTAKKE	W	F	R	Q	F	E	0	1	1	0	0	1	0	2	0	0	0	0	2	2	3	2	1	1	0	0	0	0	16		1838.82	Q61644	Q61644	284	299	Pacsin1	Protein kinase C and casein kinase substrate in neurons protein 1	yes	yes	2	4.3822e-11	210.41	1	1188500	1188500
FRVPTPNVS	GKVIPELNGKLTGMAFRVPTPNVSVVDLTC	KLTGMAFRVPTPNVSVVDLTCRLEKPAKYD	A	F	R	V	S	V	0	1	1	0	0	0	0	0	0	0	0	0	0	1	2	1	1	0	0	2	0	0	9		1015.55	P16858;Q64467	P16858	231	239	Gapdh;Gapdhs	Glyceraldehyde-3-phosphate dehydrogenase;Glyceraldehyde-3-phosphate dehydrogenase, testis-specific	yes	no	2	0.0085053	110.38	1	6231300	6231300
FRVPTPNVSV	GKVIPELNGKLTGMAFRVPTPNVSVVDLTC	LTGMAFRVPTPNVSVVDLTCRLEKPAKYDD	A	F	R	S	V	V	0	1	1	0	0	0	0	0	0	0	0	0	0	1	2	1	1	0	0	3	0	0	10		1114.61	P16858;Q64467	P16858	231	240	Gapdh;Gapdhs	Glyceraldehyde-3-phosphate dehydrogenase;Glyceraldehyde-3-phosphate dehydrogenase, testis-specific	yes	no	2	0.0020464	131.44	1	33261000	33261000
FSDYPPLGRF	AIVDMVPGKPMCVESFSDYPPLGRFAVRDM	MCVESFSDYPPLGRFAVRDMRQTVAVGVIK	S	F	S	R	F	A	0	1	0	1	0	0	0	1	0	0	1	0	0	2	2	1	0	0	1	0	0	0	10		1197.58	P10126	P10126	415	424	Eef1a1	Elongation factor 1-alpha 1	yes	yes	2	0.01969	94.309	1	2184600	2184600
FSETGAGKHVPRAVF	SDKTIGGGDDSFNTFFSETGAGKHVPRAVF	FSETGAGKHVPRAVFVDLEPTVIDEVRTGT	F	F	S	V	F	V	2	1	0	0	0	0	1	2	1	0	0	1	0	2	1	1	1	0	0	2	0	0	15		1601.83	P68373;P68369;P05213;P05214	P68373	53	67	Tuba1c;Tuba1a;Tuba1b;Tuba3a	Tubulin alpha-1C chain;Tubulin alpha-1A chain;Tubulin alpha-1B chain;Tubulin alpha-3 chain	yes	no	3;4	0.00030432	116.96	2	67205000	67205000
FSGDRGAPKRGSGKDSHTRTTHYGSLPQKSQHGRTQDEN	PRHRDTGILDSIGRFFSGDRGAPKRGSGKD	SLPQKSQHGRTQDENPVVHFFKNIVTPRTP	F	F	S	E	N	P	1	4	1	3	0	3	1	6	3	0	1	3	0	1	2	5	4	0	1	0	0	0	39		4280.06	P04370	P04370	177	215	Mbp	Myelin basic protein	yes	yes	6	0.007054	100.33	1	405970	405970
FSGDRGAPKRGSGKDSHTRTTHYGSLPQKSQHGRTQDENPVVHF	PRHRDTGILDSIGRFFSGDRGAPKRGSGKD	SQHGRTQDENPVVHFFKNIVTPRTPPPSQG	F	F	S	H	F	F	1	4	1	3	0	3	1	6	4	0	1	3	0	2	3	5	4	0	1	2	0	0	44		4859.37	P04370	P04370	177	220	Mbp	Myelin basic protein	yes	yes	6	0.014459	85.751	1	21273000	21273000
FSKVKQLPLVKPYL	MVLSPRLDHTRAVNYFSKVKQLPLVKPYLR	YFSKVKQLPLVKPYLRSVQNHNNKSVNESL	Y	F	S	Y	L	R	0	0	0	0	0	1	0	0	0	0	3	3	0	1	2	1	0	0	1	2	0	0	14		1659.01	Q68FD5	Q68FD5	1439	1452	Cltc	Clathrin heavy chain 1	yes	yes	3;4	1.5524e-06	167.32	2	8862400	8862400
FSTTIHVPNIATGEQL	TSRKDVLQEMEMLNAFSTTIHVPNIATGEQ	STTIHVPNIATGEQLLEALELLGNFKDKER	A	F	S	Q	L	L	1	0	1	0	0	1	1	1	1	2	1	0	0	1	1	1	3	0	0	1	0	0	16		1726.89	P46460	P46460	661	676	Nsf	Vesicle-fusing ATPase	yes	yes	2	0.010365	93.348	1	739630	739630
FSVMPSPKVSD	ISKIREEYPDRIMNTFSVMPSPKVSDTVVE	IMNTFSVMPSPKVSDTVVEPYNATLSVHQL	T	F	S	S	D	T	0	0	0	1	0	0	0	0	0	0	0	1	1	1	2	3	0	0	0	2	0	0	11		1192.58	Q7TMM9;Q9CWF2;Q922F4;A2AQ07	Q7TMM9	167	177	Tubb2a;Tubb2b;Tubb6;Tubb1	Tubulin beta-2A chain;Tubulin beta-2B chain;Tubulin beta-6 chain;Tubulin beta-1 chain	no	no	2	0.0021789	121.83	1	2634200	2634200
FSVMPSPKVSDT	ISKIREEYPDRIMNTFSVMPSPKVSDTVVE	MNTFSVMPSPKVSDTVVEPYNATLSVHQLV	T	F	S	D	T	V	0	0	0	1	0	0	0	0	0	0	0	1	1	1	2	3	1	0	0	2	0	0	12		1293.63	Q7TMM9;Q9CWF2;Q922F4;A2AQ07	Q7TMM9	167	178	Tubb2a;Tubb2b;Tubb6;Tubb1	Tubulin beta-2A chain;Tubulin beta-2B chain;Tubulin beta-6 chain;Tubulin beta-1 chain	no	no	2	0.0017613	121.36	1	1054700	1054700
FSVVPSPKVSD	ISKIREEYPDRIMNTFSVVPSPKVSDTVVE	IMNTFSVVPSPKVSDTVVEPYNATLSVHQL	T	F	S	S	D	T	0	0	0	1	0	0	0	0	0	0	0	1	0	1	2	3	0	0	0	3	0	0	11		1160.61	P68372;P99024;Q9D6F9;Q9ERD7	P68372	167	177	Tubb4b;Tubb5;Tubb4a;Tubb3	Tubulin beta-4B chain;Tubulin beta-5 chain;Tubulin beta-4A chain;Tubulin beta-3 chain	no	no	2	0.016244	98.048	1	6131500	6131500
FSVVPSPKVSDT	ISKIREEYPDRIMNTFSVVPSPKVSDTVVE	MNTFSVVPSPKVSDTVVEPYNATLSVHQLV	T	F	S	D	T	V	0	0	0	1	0	0	0	0	0	0	0	1	0	1	2	3	1	0	0	3	0	0	12		1261.66	P68372;P99024;Q9D6F9;Q9ERD7	P68372	167	178	Tubb4b;Tubb5;Tubb4a;Tubb3	Tubulin beta-4B chain;Tubulin beta-5 chain;Tubulin beta-4A chain;Tubulin beta-3 chain	no	no	2	0.0002333	150.46	1	5606900	5606900
FSYGRALQA	NAINKCPLLKPWALTFSYGRALQASALKAW	KPWALTFSYGRALQASALKAWGGKKENLKA	T	F	S	Q	A	S	2	1	0	0	0	1	0	1	0	0	1	0	0	1	0	1	0	0	1	0	0	0	9		1011.51	P05064;Q91Y97;P05063	P05064	300	308	Aldoa;Aldob;Aldoc	Fructose-bisphosphate aldolase A;Fructose-bisphosphate aldolase B;Fructose-bisphosphate aldolase C	no	no	2	0.03323	79.893	1	5814100	5814100
FSYTDANKNKGITWGED	NLHGLFGRKTGQAAGFSYTDANKNKGITWG	YTDANKNKGITWGEDTLMEYLENPKKYIPG	G	F	S	E	D	T	1	0	2	2	0	0	1	2	0	1	0	2	0	1	0	1	2	1	1	0	0	0	17		1944.89	P62897	P62897	47	63	Cycs	Cytochrome c, somatic	yes	yes	3	0.032319	74.786	1	940720	940720
FTFKVPYSEL	TKVHRKTLNPVFNEQFTFKVPYSELGGKTL	VFNEQFTFKVPYSELGGKTLVMAVYDFDRF	Q	F	T	E	L	G	0	0	0	0	0	0	1	0	0	0	1	1	0	2	1	1	1	0	1	1	0	0	10		1229.63	P46096	P46096	210	219	Syt1	Synaptotagmin-1	yes	yes	2	5.2979e-07	202.44	1	1429300	1429300
FTLPGTPVF	DFIPDHLLRLYQLLLFTLPGTPVFSYGDEL	LYQLLLFTLPGTPVFSYGDELGLQGALPGQ	L	F	T	V	F	S	0	0	0	0	0	0	0	1	0	0	1	0	0	2	2	0	2	0	0	1	0	0	9		977.522	P10852	P10852	352	360	Slc3a2	4F2 cell-surface antigen heavy chain	yes	yes	2	0.0015079	105.12	1	0	0
FTVIFDTGSSNL	TEYFGTIGIGTPAQDFTVIFDTGSSNLWVP	AQDFTVIFDTGSSNLWVPSVYCSSLACSDH	D	F	T	N	L	W	0	0	1	1	0	0	0	1	0	1	1	0	0	2	0	2	2	0	0	1	0	0	12		1299.63	P00791;P70269	P00791	86	97	Ctse	Cathepsin E	yes	no	2	2.5225e-06	188.49	1	671960	671960
FVHWFPLF	HYVLSMGAVFAIMAGFVHWFPLFSGFTLDD	VFAIMAGFVHWFPLFSGFTLDDTWAKAHFA	G	F	V	L	F	S	0	0	0	0	0	0	0	0	1	0	1	0	0	3	1	0	0	1	0	1	0	0	8		1091.56	P00397	P00397	393	400	Mtco1	Cytochrome c oxidase subunit 1	yes	yes	2	0.003575	136.94	1	549360	549360
FVPAPWL	IVSSASTDLQDYTYYFVPAPWLSVKLLRLL	DLQDYTYYFVPAPWLSVKLLRLLQCYPPPE	Y	F	V	W	L	S	1	0	0	0	0	0	0	0	0	0	1	0	0	1	2	0	0	1	0	1	0	0	7		828.453	P17426;P17427	P17426	251	257	Ap2a1;Ap2a2	AP-2 complex subunit alpha-1;AP-2 complex subunit alpha-2	no	no	2	0.0089756	121.92	1	634100	634100
FWSRVNIPKVL	YSKFKPQKMREHLELFWSRVNIPKVLRAAE	HLELFWSRVNIPKVLRAAEQAHLWAELVFL	L	F	W	V	L	R	0	1	1	0	0	0	0	0	0	1	1	1	0	1	1	1	0	1	0	2	0	0	11		1357.79	Q68FD5	Q68FD5	1339	1349	Cltc	Clathrin heavy chain 1	yes	yes	3	0.0023161	119.74	1	3073400	3073400
FWSRVNIPKVLRA	YSKFKPQKMREHLELFWSRVNIPKVLRAAE	ELFWSRVNIPKVLRAAEQAHLWAELVFLYD	L	F	W	R	A	A	1	2	1	0	0	0	0	0	0	1	1	1	0	1	1	1	0	1	0	2	0	0	13		1584.93	Q68FD5	Q68FD5	1339	1351	Cltc	Clathrin heavy chain 1	yes	yes	4	0.02254	90.759	1	887870	887870
FYKGIRPAIN	VISITDGQIFLETELFYKGIRPAINVGLSV	LETELFYKGIRPAINVGLSVSRVGSAAQTR	L	F	Y	I	N	V	1	1	1	0	0	0	0	1	0	2	0	1	0	1	1	0	0	0	1	0	0	0	10		1177.66	Q03265	Q03265	400	409	Atp5a1	ATP synthase subunit alpha, mitochondrial	yes	yes	2	0.026304	86.095	1	2811600	2811600
FYKGVAPLW	REAVPKMYKEEGLNAFYKGVAPLWMRQIPY	EEGLNAFYKGVAPLWMRQIPYTMMKFACFE	A	F	Y	L	W	M	1	0	0	0	0	0	0	1	0	0	1	1	0	1	1	0	0	1	1	1	0	0	9		1079.58	Q8VEM8	Q8VEM8	211	219	Slc25a3	Phosphate carrier protein, mitochondrial	yes	yes	2	0.0042093	122.79	1	2992000	2992000
GASGGIGQPLSL	SFSTSAQNNAKVAVLGASGGIGQPLSLLLK	AVLGASGGIGQPLSLLLKNSPLVSRLTLYD	L	G	A	S	L	L	1	0	0	0	0	1	0	4	0	1	2	0	0	0	1	2	0	0	0	0	0	0	12		1055.56	P08249	P08249	31	42	Mdh2	Malate dehydrogenase, mitochondrial	yes	yes	2	0.012338	102.52	1	2491600	2491600
GDQALSFLKDFLAGGIAAAVSKTAVAPIERVKLLL	______________________________	SKTAVAPIERVKLLLQVQHASKQISAEKQY	M	G	D	L	L	Q	7	1	0	2	0	1	1	3	0	2	6	3	0	2	1	2	1	0	0	3	0	0	35		3582.05	P48962	P48962	2	36	Slc25a4	ADP/ATP translocase 1	yes	yes	4	1.5237e-22	249.14	1	0	0
GFIPEIIF	LFNHIYFKKPLNIYFGFIPEIIFMSSLFGY	KPLNIYFGFIPEIIFMSSLFGYLVILIFYK	F	G	F	I	F	M	0	0	0	0	0	0	1	1	0	3	0	0	0	2	1	0	0	0	0	0	0	0	8		934.516	Q9Z1G4	Q9Z1G4	579	586	Atp6v0a1	V-type proton ATPase 116 kDa subunit a isoform 1	yes	yes	2	0.0040425	133.99	1	145040	145040
GLAYPSISASGATPVFDNL	EPGSFLYYAPFDGILGLAYPSISASGATPV	PSISASGATPVFDNLWDQGLVSQDLFSVYL	L	G	L	N	L	W	3	0	1	1	0	0	0	2	0	1	2	0	0	1	2	3	1	0	1	1	0	0	19		1878.94	P00791	P00791	181	199			yes	yes	2	4.1013e-18	252.37	1	667160	667160
GLMPPLPFF	SQSPTATEIPGPLGSGLMPPLPFFNKQKAI	PGPLGSGLMPPLPFFNKQKAIDLLYWRDIK	S	G	L	F	F	N	0	0	0	0	0	0	0	1	0	0	2	0	1	2	3	0	0	0	0	0	0	0	9		1017.54	Q8K0T0	Q8K0T0	580	588	Rtn1	Reticulon-1	yes	yes	2	0.043253	58.551	1	0	0
GMTHRTFIPYPLPLF	GPNRYLLFHLVKYIFGMTHRTFIPYPLPLF	GMTHRTFIPYPLPLFVYSWIGKLFGLSPFE	F	G	M	L	F	V	0	1	0	0	0	0	0	1	1	1	2	0	1	2	3	0	2	0	1	0	0	0	15		1788.94	Q9DC69	Q9DC69	282	296	Ndufa9	NADH dehydrogenase [ubiquinone] 1 alpha subcomplex subunit 9, mitochondrial	yes	yes	2;3	0.00087603	121.08	2	738680	738680
GRIMNVIGEPIDE	DSGAPIKIPVGPETLGRIMNVIGEPIDERG	TLGRIMNVIGEPIDERGPIKTKQFAPIHAE	L	G	R	D	E	R	0	1	1	1	0	0	2	2	0	3	0	0	1	0	1	0	0	0	0	1	0	0	13		1441.72	P56480	P56480	142	154	Atp5b	ATP synthase subunit beta, mitochondrial	yes	yes	2	0.014763	99.568	1	2306800	2306800
GRIPSAVGYQPTL	IFRFTQAGSEVSALLGRIPSAVGYQPTLAT	LLGRIPSAVGYQPTLATDMGTMQERITTTK	L	G	R	T	L	A	1	1	0	0	0	1	0	2	0	1	1	0	0	0	2	1	1	0	1	1	0	0	13		1357.74	P56480	P56480	323	335	Atp5b	ATP synthase subunit beta, mitochondrial	yes	yes	2	0.0032193	112.64	1	3041500	3041500
GRVAVSADPNVPNVIV	DKDDESLRKYKEALLGRVAVSADPNVPNVI	RVAVSADPNVPNVIVTRLTLVCSTAPGPLE	L	G	R	I	V	T	2	1	2	1	0	0	0	1	0	1	0	0	0	0	2	1	0	0	0	5	0	0	16		1605.88	Q99PT1	Q99PT1	57	72	Arhgdia	Rho GDP-dissociation inhibitor 1	yes	yes	2	0.021159	89.959	1	917570	917570
GVIPSTPLAIHTPLMPNQ	QHMTDFAIQFNKNSFGVIPSTPLAIHTPLM	PSTPLAIHTPLMPNQSIDVSLPLNTLGPVM	F	G	V	N	Q	S	1	0	1	0	0	1	0	1	1	2	2	0	1	0	4	1	2	0	0	1	0	0	18		1885.01	Q9DBG3	Q9DBG3	763	780	Ap2b1	AP-2 complex subunit beta	yes	yes	2	0.00017913	142.91	1	302330	302330
GVLPWNAF	TSASIGSLCADARMYGVLPWNAFPGKVCGS	CADARMYGVLPWNAFPGKVCGSNLLSICKT	Y	G	V	A	F	P	1	0	1	0	0	0	0	1	0	0	1	0	0	1	1	0	0	1	0	1	0	0	8		902.465	P60202	P60202	208	215	Plp1	Myelin proteolipid protein	yes	yes	2	0.00083107	154.29	1	1141900	1141900
GYALPHAIL	MDSGDGVTHTVPIYEGYALPHAILRLDLAG	TVPIYEGYALPHAILRLDLAGRDLTDYLMK	E	G	Y	I	L	R	2	0	0	0	0	0	0	1	1	1	2	0	0	0	1	0	0	0	1	0	0	0	9		953.533	P63260;P60710;Q8BFZ3	P63260	168	176	Actg1;Actb;Actbl2	Actin, cytoplasmic 2;Actin, cytoplasmic 2, N-terminally processed;Actin, cytoplasmic 1;Actin, cytoplasmic 1, N-terminally processed;Beta-actin-like protein 2	yes	no	2	0.0018892	142.27	1	1849900	1849900
HFFMPGF	DLRKLAVNMVPFPRLHFFMPGFAPLTSRGS	NMVPFPRLHFFMPGFAPLTSRGSQQYRALT	L	H	F	G	F	A	0	0	0	0	0	0	0	1	1	0	0	0	1	3	1	0	0	0	0	0	0	0	7		881.389	P68372;P99024;Q7TMM9;Q9CWF2;Q922F4;A2AQ07;Q9D6F9;Q9ERD7	P68372	264	270	Tubb4b;Tubb5;Tubb2a;Tubb2b;Tubb6;Tubb1;Tubb4a;Tubb3	Tubulin beta-4B chain;Tubulin beta-5 chain;Tubulin beta-2A chain;Tubulin beta-2B chain;Tubulin beta-6 chain;Tubulin beta-1 chain;Tubulin beta-4A chain;Tubulin beta-3 chain	no	no	2	0.021771	102.87	1	2112700	2112700
HFFMPGFAPLTA	DLRKLAVNMVPFPRLHFFMPGFAPLTARGS	PRLHFFMPGFAPLTARGSQQYRALTVPELT	L	H	F	T	A	R	2	0	0	0	0	0	0	1	1	0	1	0	1	3	2	0	1	0	0	0	0	0	12		1334.65	Q922F4;A2AQ07;Q9ERD7	Q922F4	264	275	Tubb6;Tubb1;Tubb3	Tubulin beta-6 chain;Tubulin beta-1 chain;Tubulin beta-3 chain	no	no	2	0.01076	104.37	1	552810	552810
HFFMPGFAPLTS	DLRKLAVNMVPFPRLHFFMPGFAPLTSRGS	PRLHFFMPGFAPLTSRGSQQYRALTVPELT	L	H	F	T	S	R	1	0	0	0	0	0	0	1	1	0	1	0	1	3	2	1	1	0	0	0	0	0	12		1350.64	P68372;P99024;Q7TMM9;Q9CWF2;Q9D6F9	P68372	264	275	Tubb4b;Tubb5;Tubb2a;Tubb2b;Tubb4a	Tubulin beta-4B chain;Tubulin beta-5 chain;Tubulin beta-2A chain;Tubulin beta-2B chain;Tubulin beta-4A chain	no	no	2	3.0211e-05	147.34	1	455630	455630
HFFMPGFAPLTSRGSQQ	DLRKLAVNMVPFPRLHFFMPGFAPLTSRGS	FMPGFAPLTSRGSQQYRALTVPELTQQMFD	L	H	F	Q	Q	Y	1	1	0	0	0	2	0	2	1	0	1	0	1	3	2	2	1	0	0	0	0	0	17		1906.91	P68372;P99024;Q7TMM9;Q9CWF2;Q9D6F9	P68372	264	280	Tubb4b;Tubb5;Tubb2a;Tubb2b;Tubb4a	Tubulin beta-4B chain;Tubulin beta-5 chain;Tubulin beta-2A chain;Tubulin beta-2B chain;Tubulin beta-4A chain	no	no	2;3	3.9204e-07	180.49	2	7940400	7940400
HKTDLNPDNLQGGDDLDPNY	PIIEERHGGYQPSDEHKTDLNPDNLQGGDD	NPDNLQGGDDLDPNYVLSSRVRTGRSIRGF	E	H	K	N	Y	V	0	0	3	5	0	1	0	2	1	0	3	1	0	0	2	0	1	0	1	0	0	0	20		2240	Q04447	Q04447	106	125	Ckb	Creatine kinase B-type	yes	yes	3	2.16e-07	173.77	1	2073300	2073300
HKTDLNPDNLQGGDDLDPNYVL	PIIEERHGGYQPSDEHKTDLNPDNLQGGDD	DNLQGGDDLDPNYVLSSRVRTGRSIRGFCL	E	H	K	V	L	S	0	0	3	5	0	1	0	2	1	0	4	1	0	0	2	0	1	0	1	1	0	0	22		2452.15	Q04447	Q04447	106	127	Ckb	Creatine kinase B-type	yes	yes	3	0.015106	89.201	1	2224800	2224800
HLVHWNTKYGDF	GSEHTVNKKKYAAELHLVHWNTKYGDFGKA	AELHLVHWNTKYGDFGKAVQQPDGLAVLGI	L	H	L	D	F	G	0	0	1	1	0	0	0	1	2	0	1	1	0	1	0	0	1	1	1	1	0	0	12		1515.73	P00920	P00920	119	130	Ca2	Carbonic anhydrase 2	yes	yes	3	0.0025538	113.95	1	4169700	4169700
HRIIPGF	LSTGEKGFGYKGSSFHRIIPGFMCQGGDFT	FGYKGSSFHRIIPGFMCQGGDFTRHNGTGG	F	H	R	G	F	M	0	1	0	0	0	0	0	1	1	2	0	0	0	1	1	0	0	0	0	0	0	0	7		838.481	P17742	P17742	54	60	Ppia	Peptidyl-prolyl cis-trans isomerase A;Peptidyl-prolyl cis-trans isomerase A, N-terminally processed	yes	yes	2	0.025035	99.511	1	9976900	9976900
HVDITEWHKGIQE	WREWADSKSCCDYSLHVDITEWHKGIQEEM	SLHVDITEWHKGIQEEMEALVKDHGVNSFL	L	H	V	Q	E	E	0	0	0	1	0	1	2	1	2	2	0	1	0	0	0	0	1	1	0	1	0	0	13		1590.78	O08553	O08553	138	150	Dpysl2	Dihydropyrimidinase-related protein 2	yes	yes	3	0.016422	97.69	1	6174500	6174500
HVDITEWHKGIQEEM	WREWADSKSCCDYSLHVDITEWHKGIQEEM	HVDITEWHKGIQEEMEALVKDHGVNSFLVY	L	H	V	E	M	E	0	0	0	1	0	1	3	1	2	2	0	1	1	0	0	0	1	1	0	1	0	0	15		1850.86	O08553	O08553	138	152	Dpysl2	Dihydropyrimidinase-related protein 2	yes	yes	3	1.715e-06	157.68	1	1293500	1293500
HVTEGSGRYIPRKPFPDF	VVISQGKIVLEDGTLHVTEGSGRYIPRKPF	EGSGRYIPRKPFPDFVYKRIKARSRLAELR	L	H	V	D	F	V	0	2	0	1	0	0	1	2	1	1	0	1	0	2	3	1	1	0	1	1	0	0	18		2102.07	O08553	O08553	460	477	Dpysl2	Dihydropyrimidinase-related protein 2	yes	yes	3;4	2.6007e-05	152.94	2	20219000	20219000
IAAQKGLDPYNMLPPKAASGTKEDPNL	PTDEEQATGLEREIMIAAQKGLDPYNMLPP	LPPKAASGTKEDPNLVPSISNKRIVGCICE	M	I	A	N	L	V	4	0	2	2	0	1	1	2	0	1	3	3	1	0	4	1	1	0	1	0	0	0	27		2838.46	P19536	P19536	52	78	Cox5b	Cytochrome c oxidase subunit 5B, mitochondrial	yes	yes	4	0.0027402	108.63	1	1873900	1873900
IAAQKGLDPYNMLPPKAASGTKEDPNLVPSISN	PTDEEQATGLEREIMIAAQKGLDPYNMLPP	SGTKEDPNLVPSISNKRIVGCICEEDNCTV	M	I	A	S	N	K	4	0	3	2	0	1	1	2	0	2	3	3	1	0	5	3	1	0	1	1	0	0	33		3435.77	P19536	P19536	52	84	Cox5b	Cytochrome c oxidase subunit 5B, mitochondrial	yes	yes	4	4.003e-05	126.88	1	866210	866210
IAAQKGLDPYNMLPPKAASGTKEDPNLVPSISNKRIVG	PTDEEQATGLEREIMIAAQKGLDPYNMLPP	DPNLVPSISNKRIVGCICEEDNCTVIWFWL	M	I	A	V	G	C	4	1	3	2	0	1	1	3	0	3	3	4	1	0	5	3	1	0	1	2	0	0	38		3989.14	P19536	P19536	52	89	Cox5b	Cytochrome c oxidase subunit 5B, mitochondrial	yes	yes	5	1.0961e-09	183.89	1	1906300	1906300
IAFPGDIL	LLRLASPIHPDVVMLIAFPGDILMRMLKML	HPDVVMLIAFPGDILMRMLKMLILPLIISS	L	I	A	I	L	M	1	0	0	1	0	0	0	1	0	2	1	0	0	1	1	0	0	0	0	0	0	0	8		844.469	P43006	P43006	78	85	Slc1a2	Excitatory amino acid transporter 2	yes	yes	2	0.014516	105.42	1	513810	513810
IAGDPRSSPLIQF	LVKVGGYILGEFGNLIAGDPRSSPLIQFNL	NLIAGDPRSSPLIQFNLLHSKFHLCSVPTR	L	I	A	Q	F	N	1	1	0	1	0	1	0	1	0	2	1	0	0	1	2	2	0	0	0	0	0	0	13		1399.75	P17427	P17427	510	522	Ap2a2	AP-2 complex subunit alpha-2	yes	yes	2	0.020477	93.096	1	1188900	1188900
IAGDPRSSPPVQF	MVKVGGYILGEFGNLIAGDPRSSPPVQFSL	NLIAGDPRSSPPVQFSLLHSKFHLCSVATR	L	I	A	Q	F	S	1	1	0	1	0	1	0	1	0	1	0	0	0	1	3	2	0	0	0	1	0	0	13		1369.7	P17426	P17426	511	523	Ap2a1	AP-2 complex subunit alpha-1	yes	yes	2	0.03403	77.744	1	700510	700510
IDLPGITKVPVGDQPPDIE	INLRVYSPHVLNLTLIDLPGITKVPVGDQP	GITKVPVGDQPPDIEYQIKDMILQFISRES	L	I	D	I	E	Y	0	0	0	3	0	1	1	2	0	3	1	1	0	0	4	0	1	0	0	2	0	0	19		2002.06	P39054;Q8BZ98	P39054	135	153	Dnm2;Dnm3	Dynamin-2;Dynamin-3	yes	no	2	2.068e-07	178.07	1	308870	308870
IDLPGITKVPVGDQPPDIEY	INLRVYSPHVLNLTLIDLPGITKVPVGDQP	ITKVPVGDQPPDIEYQIKDMILQFISRESS	L	I	D	E	Y	Q	0	0	0	3	0	1	1	2	0	3	1	1	0	0	4	0	1	0	1	2	0	0	20		2165.13	P39054;Q8BZ98	P39054	135	154	Dnm2;Dnm3	Dynamin-2;Dynamin-3	yes	no	2	3.3888e-07	161.84	1	144950	144950
IEDPFDQDD	ADLYKSFVQNYPVVSIEDPFDQDDWGAWQK	NYPVVSIEDPFDQDDWGAWQKFTASAGIQV	S	I	E	D	D	W	0	0	0	4	0	1	1	0	0	1	0	0	0	1	1	0	0	0	0	0	0	0	9		1092.42	P17182;P21550;P17183	P17182	292	300	Eno1;Eno3;Eno2	Alpha-enolase;Beta-enolase;Gamma-enolase	no	no	2	0.0047797	118.33	1	1417900	1417900
IEDPVRPEVPEA	ENDVVTGLTCIAVVGIEDPVRPEVPEAIKK	VVGIEDPVRPEVPEAIKKCQRAGITVRMVT	G	I	E	E	A	I	1	1	0	1	0	0	3	0	0	1	0	0	0	0	3	0	0	0	0	2	0	0	12		1349.68	G5E829;Q9R0K7	G5E829	682	693	Atp2b1;Atp2b2	Plasma membrane calcium-transporting ATPase 1;Plasma membrane calcium-transporting ATPase 2	yes	no	2	0.017913	96.015	1	640890	640890
IEHYAQLGPSQPPDL	SMSVAVEFRDYLGDFIEHYAQLGPSQPPDL	IEHYAQLGPSQPPDLAQAQDEPRRALKSEF	F	I	E	D	L	A	1	0	0	1	0	2	1	1	1	1	2	0	0	0	3	1	0	0	1	0	0	0	15		1663.82	P42669	P42669	117	131	Pura	Transcriptional activator protein Pur-alpha	yes	yes	2	0.00083995	122.46	1	1321700	1321700
IEILNPNKIATII	KMKGLAFIQDPDGYWIEILNPNKIATII__	YWIEILNPNKIATII_______________	W	I	E	I	I	-	1	0	2	0	0	0	1	0	0	5	1	1	0	0	1	0	1	0	0	0	0	0	13		1450.88	Q9CPU0	Q9CPU0	172	184	Glo1	Lactoylglutathione lyase	yes	yes	2	6.2719e-06	164.65	1	525000	525000
IEIPEVRL	HYYHMAHGKDFASRGIEIPEVRLNLEKMME	KDFASRGIEIPEVRLNLEKMMEQKHSAVKA	G	I	E	R	L	N	0	1	0	0	0	0	2	0	0	2	1	0	0	0	1	0	0	0	0	1	0	0	8		967.57	O08749	O08749	111	118	Dld	Dihydrolipoyl dehydrogenase, mitochondrial	yes	yes	2	0.026587	90.657	1	2276200	2276200
IERPTYTNL	VDNEAIYDICRRNLDIERPTYTNLNRLISQ	CRRNLDIERPTYTNLNRLISQIVSSITASL	D	I	E	N	L	N	0	1	1	0	0	0	1	0	0	1	1	0	0	0	1	0	2	0	1	0	0	0	9		1105.58	P68373;P68369;P05213;P05214;Q9JJZ2	P68373	219	227	Tuba1c;Tuba1a;Tuba1b;Tuba3a;Tuba8	Tubulin alpha-1C chain;Tubulin alpha-1A chain;Tubulin alpha-1B chain;Tubulin alpha-3 chain;Tubulin alpha-8 chain	no	no	2	0.00041688	155.07	1	27404000	27404000
IGDEPLE	KHNPASKYFPEAAALIGDEPLENYLDTEYF	YFPEAAALIGDEPLENYLDTEYFGTIGIGT	L	I	G	L	E	N	0	0	0	1	0	0	2	1	0	1	1	0	0	0	1	0	0	0	0	0	0	0	7		771.365	P00791	P00791	60	66			yes	yes	1	0.02526	99.279	1	4343900	4343900
IGDEPLENYLDTEY	KHNPASKYFPEAAALIGDEPLENYLDTEYF	LIGDEPLENYLDTEYFGTIGIGTPAQDFTV	L	I	G	E	Y	F	0	0	1	2	0	0	3	1	0	1	2	0	0	0	1	0	1	0	2	0	0	0	14		1669.74	P00791	P00791	60	73			yes	yes	2	3.9966e-12	233.54	1	2196900	2196900
IGIGGSDLGPLM	DWKGYTGKSITDIINIGIGGSDLGPLMVTE	IINIGIGGSDLGPLMVTEALKPYSKGGPRV	N	I	G	L	M	V	0	0	0	1	0	0	0	4	0	2	2	0	1	0	1	1	0	0	0	0	0	0	12		1128.58	P06745	P06745	155	166	Gpi	Glucose-6-phosphate isomerase	yes	yes	2	9.7857e-05	153.04	1	858790	858790
IGLGNVWRF	WKGRFDFLMSCVGYAIGLGNVWRFPYLCGK	SCVGYAIGLGNVWRFPYLCGKNGGGAFLIP	A	I	G	R	F	P	0	1	1	0	0	0	0	2	0	1	1	0	0	1	0	0	0	1	0	1	0	0	9		1060.58	P31648	P31648	62	70	Slc6a1	Sodium- and chloride-dependent GABA transporter 1	no	no	2	0.022478	88.942	1	244320	244320
IGNERFRCPEAL	SLEKSYELPDGQVITIGNERFRCPEALFQP	VITIGNERFRCPEALFQPSFLGMESCGIHE	T	I	G	A	L	F	1	2	1	0	1	0	2	1	0	1	1	0	0	1	1	0	0	0	0	0	0	0	12		1403.7	P63260;P60710	P63260	250	261	Actg1;Actb	Actin, cytoplasmic 2;Actin, cytoplasmic 2, N-terminally processed;Actin, cytoplasmic 1;Actin, cytoplasmic 1, N-terminally processed	yes	no	2	0.031851	101.48	1	1753900	1753900
IGSTHILTPQKL	CAYEVTQANGKWEVLIGSTHILTPQKLLDT	EVLIGSTHILTPQKLLDTLKKLNKTDEEIS	L	I	G	K	L	L	0	0	0	0	0	1	0	1	1	2	2	1	0	0	1	1	2	0	0	0	0	0	12		1306.76	O08599	O08599	567	578	Stxbp1	Syntaxin-binding protein 1	yes	yes	2	0.03081	96.229	1	1303900	1303900
IGTDSHTPNGGGLGGIC	HQIILENYAYPGVLLIGTDSHTPNGGGLGG	TDSHTPNGGGLGGICIGVGGADAVDVMAGI	L	I	G	I	C	I	0	0	1	1	1	0	0	6	1	2	1	0	0	0	1	1	2	0	0	0	0	0	17		1554.71	Q99KI0	Q99KI0	189	205	Aco2	Aconitate hydratase, mitochondrial	yes	yes	2	0.014067	97.716	1	1228900	1228900
IIANIPLPLGT	TLTSNIPEITPFLIFIIANIPLPLGTVTIL	FLIFIIANIPLPLGTVTILCIDLGTDMVPA	F	I	I	G	T	V	1	0	1	0	0	0	0	1	0	3	2	0	0	0	2	0	1	0	0	0	0	0	11		1120.69	Q6PIE5;Q8VDN2	Q8VDN2	794	804	Atp1a2;Atp1a1	Sodium/potassium-transporting ATPase subunit alpha-2;Sodium/potassium-transporting ATPase subunit alpha-1	no	no	2	9.2731e-19	285.27	1	6432500	6432500
IIDHVVPEPGTSL	FFQGTKAALAGGTTMIIDHVVPEPGTSLLA	TMIIDHVVPEPGTSLLAAFDQWREWADSKS	M	I	I	S	L	L	0	0	0	1	0	0	1	1	1	2	1	0	0	0	2	1	1	0	0	2	0	0	13		1375.73	O08553	O08553	104	116	Dpysl2	Dihydropyrimidinase-related protein 2	yes	yes	2	0.00030657	147.2	1	9629500	9629500
IIDHVVPEPGTSLL	FFQGTKAALAGGTTMIIDHVVPEPGTSLLA	MIIDHVVPEPGTSLLAAFDQWREWADSKSC	M	I	I	L	L	A	0	0	0	1	0	0	1	1	1	2	2	0	0	0	2	1	1	0	0	2	0	0	14		1488.82	O08553	O08553	104	117	Dpysl2	Dihydropyrimidinase-related protein 2	yes	yes	2	4.0179e-07	187.64	1	3415500	3415500
IIGATNRPDIID	ILTEMDGMSTKKNVFIIGATNRPDIIDPAI	NVFIIGATNRPDIIDPAILRPGRLDQLIYI	F	I	I	I	D	P	1	1	1	2	0	0	0	1	0	4	0	0	0	0	1	0	1	0	0	0	0	0	12		1296.7	Q01853	Q01853	619	630	Vcp	Transitional endoplasmic reticulum ATPase	yes	yes	2	0.030115	81.771	1	920050	920050
IIKWGDPVT	FGTNQEDYASYIMNGIIKWGDPVTRVLDDG	SYIMNGIIKWGDPVTRVLDDGELLVQQTKN	G	I	I	V	T	R	0	0	0	1	0	0	0	1	0	2	0	1	0	0	1	0	1	1	0	1	0	0	9		1027.57	P46460	P46460	507	515	Nsf	Vesicle-fusing ATPase	yes	yes	2	0.0013487	146.81	1	1231400	1231400
IILNHPGQISAG	KADPPQEAAQFTSQVIILNHPGQISAGYSP	SQVIILNHPGQISAGYSPVIDCHTAHIACK	V	I	I	A	G	Y	1	0	1	0	0	1	0	2	1	3	1	0	0	0	1	1	0	0	0	0	0	0	12		1218.67	P10126;P62631	P62631	345	356	Eef1a1;Eef1a2	Elongation factor 1-alpha 1;Elongation factor 1-alpha 2	no	no	2	0.033744	77.533	1	2416700	2416700
IILPFRVIPL	PDGEFELMRYRTTKDIILPFRVIPLVREVG	RTTKDIILPFRVIPLVREVGRTKLEVKVVI	D	I	I	P	L	V	0	1	0	0	0	0	0	0	0	3	2	0	0	1	2	0	0	0	0	1	0	0	10		1179.77	P84091	P84091	283	292	Ap2m1	AP-2 complex subunit mu	yes	yes	2	0.020533	93.262	1	1300400	1300400
IILPFRVIPLVRE	PDGEFELMRYRTTKDIILPFRVIPLVREVG	KDIILPFRVIPLVREVGRTKLEVKVVIKSN	D	I	I	R	E	V	0	2	0	0	0	0	1	0	0	3	2	0	0	1	2	0	0	0	0	2	0	0	13		1563.99	P84091	P84091	283	295	Ap2m1	AP-2 complex subunit mu	yes	yes	3	0.01829	80.522	1	931130	931130
IITPWNF	DKRGLVLKQPVGVAAIITPWNFPSAMITRK	KQPVGVAAIITPWNFPSAMITRKVGAALAA	A	I	I	N	F	P	0	0	1	0	0	0	0	0	0	2	0	0	0	1	1	0	1	1	0	0	0	0	7		889.47	Q8BWF0	Q8BWF0	188	194	Aldh5a1	Succinate-semialdehyde dehydrogenase, mitochondrial	yes	yes	2	0.0079964	126.68	1	249960	249960
IIVANVPEGLL	ILGYTWLEAVIFLIGIIVANVPEGLLATVT	FLIGIIVANVPEGLLATVTVCLTLTAKRMA	G	I	I	L	L	A	1	0	1	0	0	0	1	1	0	2	2	0	0	0	1	0	0	0	0	2	0	0	11		1136.68	Q6PIC6;Q9WV27;Q9Z1W8;Q6PIE5;Q8VDN2	Q6PIC6	317	327	Atp1a3;Atp1a4;Atp12a;Atp1a2;Atp1a1	Sodium/potassium-transporting ATPase subunit alpha-3;Sodium/potassium-transporting ATPase subunit alpha-4;Potassium-transporting ATPase alpha chain 2;Sodium/potassium-transporting ATPase subunit alpha-2;Sodium/potassium-transporting ATPase subunit alpha-1	no	no	2	0.002441	124.23	1	689180	689180
IIWDSYTTNKVHAIPLRSSW	TDSRLLVSASQDGKLIIWDSYTTNKVHAIP	YTTNKVHAIPLRSSWVMTCAYAPSGNYVAC	L	I	I	S	W	V	1	1	1	1	0	0	0	0	1	3	1	1	0	0	1	3	2	2	1	1	0	0	20		2386.24	P62874;P62880	P62874	80	99	Gnb1;Gnb2	Guanine nucleotide-binding protein G(I)/G(S)/G(T) subunit beta-1;Guanine nucleotide-binding protein G(I)/G(S)/G(T) subunit beta-2	yes	no	3	0.040345	72.644	1	567940	567940
IKDLGATW	KVTNGAFTGEISPGMIKDLGATWVVLGHSE	GEISPGMIKDLGATWVVLGHSERRHVFGES	M	I	K	T	W	V	1	0	0	1	0	0	0	1	0	1	1	1	0	0	0	0	1	1	0	0	0	0	8		902.486	P17751	P17751	84	91	Tpi1	Triosephosphate isomerase	yes	yes	2	0.0051444	127.02	1	3041300	3041300
IKLPHLGKHEKFSEVL	TCPSNLGTGLRAGVHIKLPHLGKHEKFSEV	KLPHLGKHEKFSEVLKRLRLQKRGTGGVDT	H	I	K	V	L	K	0	0	0	0	0	0	2	1	2	1	3	3	0	1	1	1	0	0	0	1	0	0	16		1874.08	Q04447	Q04447	297	312	Ckb	Creatine kinase B-type	yes	yes	4	0.02567	84.508	1	3359800	3359800
IKVDKGVVPLAGTDGETTTQGLDGLL	VPFVRTIQDKGILVGIKVDKGVVPLAGTDG	GTDGETTTQGLDGLLERCAQYKKDGADFAK	G	I	K	L	L	E	1	0	0	3	0	1	1	5	0	1	4	2	0	0	1	0	4	0	0	3	0	0	26		2596.4	P05063	P05063	107	132	Aldoc	Fructose-bisphosphate aldolase C	yes	yes	3	0.017761	75.23	1	705660	705660
IKVDKGVVPLAGTNGETTTQGL	RPFPQVIKSKGGVVGIKVDKGVVPLAGTNG	VPLAGTNGETTTQGLDGLSERCAQYKKDGA	G	I	K	G	L	D	1	0	1	1	0	1	1	4	0	1	2	2	0	0	1	0	4	0	0	3	0	0	22		2197.2	P05064	P05064	107	128	Aldoa	Fructose-bisphosphate aldolase A	yes	yes	3	2.4181e-07	156.89	1	2072300	2072300
IKVDKGVVPLAGTNGETTTQGLDG	RPFPQVIKSKGGVVGIKVDKGVVPLAGTNG	LAGTNGETTTQGLDGLSERCAQYKKDGADF	G	I	K	D	G	L	1	0	1	2	0	1	1	5	0	1	2	2	0	0	1	0	4	0	0	3	0	0	24		2369.24	P05064	P05064	107	130	Aldoa	Fructose-bisphosphate aldolase A	yes	yes	3	0.00013485	123.35	1	3519700	3519700
IKVDKGVVPLAGTNGETTTQGLDGL	RPFPQVIKSKGGVVGIKVDKGVVPLAGTNG	AGTNGETTTQGLDGLSERCAQYKKDGADFA	G	I	K	G	L	S	1	0	1	2	0	1	1	5	0	1	3	2	0	0	1	0	4	0	0	3	0	0	25		2482.33	P05064	P05064	107	131	Aldoa	Fructose-bisphosphate aldolase A	yes	yes	3	4.3104e-27	278.95	1	13551000	13551000
IKVDKGVVPLAGTNGETTTQGLDGLSE	RPFPQVIKSKGGVVGIKVDKGVVPLAGTNG	TNGETTTQGLDGLSERCAQYKKDGADFAKW	G	I	K	S	E	R	1	0	1	2	0	1	2	5	0	1	3	2	0	0	1	1	4	0	0	3	0	0	27		2698.4	P05064	P05064	107	133	Aldoa	Fructose-bisphosphate aldolase A	yes	yes	3	7.7545e-14	204.35	1	1259200	1259200
IKVLGPYTF	EVQGMIQLNGCQPMEIKVLGPYTFSICDTS	GCQPMEIKVLGPYTFSICDTSNFSDYIRGG	E	I	K	T	F	S	0	0	0	0	0	0	0	1	0	1	1	1	0	1	1	0	1	0	1	1	0	0	9		1036.6	Q02053;P31254	Q02053	267	275	Uba1;Uba1y	Ubiquitin-like modifier-activating enzyme 1;Ubiquitin-like modifier-activating enzyme 1 Y	yes	no	2	0.0046123	119.41	1	1225100	1225100
IKWGEAGAEY	NGKPITIFQERDPTNIKWGEAGAEYVVEST	RDPTNIKWGEAGAEYVVESTGVFTTMEKAG	N	I	K	E	Y	V	2	0	0	0	0	0	2	2	0	1	0	1	0	0	0	0	0	1	1	0	0	0	10		1122.53	P16858	P16858	83	92	Gapdh	Glyceraldehyde-3-phosphate dehydrogenase	yes	yes	2	0.020665	93.098	1	4498700	4498700
ILDRGFDPSSPVL	PTMGEGPDKARSQLLILDRGFDPSSPVLHE	LLILDRGFDPSSPVLHELTFQAMSYDLLPI	L	I	L	V	L	H	0	1	0	2	0	0	0	1	0	1	2	0	0	1	2	2	0	0	0	1	0	0	13		1414.75	O08599	O08599	232	244	Stxbp1	Syntaxin-binding protein 1	yes	yes	2	0.00061204	108.9	1	0	0
ILRGLPGSGKSTL	DEDTVATLHECKTLFILRGLPGSGKSTLAR	LFILRGLPGSGKSTLARLILEKYHDGTKMV	F	I	L	T	L	A	0	1	0	0	0	0	0	3	0	1	3	1	0	0	1	2	1	0	0	0	0	0	13		1297.77	P16330	P16330	54	66	Cnp	2,3-cyclic-nucleotide 3-phosphodiesterase	yes	yes	2;3	0.0022992	92.039	2	12019000	12019000
IMANIPLPLGT	TLTSNIPEITPFLLFIMANIPLPLGTITIL	FLLFIMANIPLPLGTITILCIDLGTDMVPA	F	I	M	G	T	I	1	0	1	0	0	0	0	1	0	2	2	0	1	0	2	0	1	0	0	0	0	0	11		1138.64	Q6PIC6	Q6PIC6	784	794	Atp1a3	Sodium/potassium-transporting ATPase subunit alpha-3	yes	yes	2	1.238e-05	174.52	1	1529000	1529000
IMKSIIPVVM	SGTGIAAMSVMRPELIMKSIIPVVMAGIIA	MRPELIMKSIIPVVMAGIIAIYGLVVAVLI	L	I	M	V	M	A	0	0	0	0	0	0	0	0	0	3	0	1	2	0	1	1	0	0	0	2	0	0	10		1129.66	P63082	P63082	52	61	Atp6v0c	V-type proton ATPase 16 kDa proteolipid subunit	yes	yes	2	0.0025195	125.82	1	1652700	1652700
INDPFIDL	VTRAAICSGKVEIVAINDPFIDLNYMVYMF	GKVEIVAINDPFIDLNYMVYMFQYDSTHGK	A	I	N	D	L	N	0	0	1	2	0	0	0	0	0	2	1	0	0	1	1	0	0	0	0	0	0	0	8		945.481	P16858	P16858	31	38	Gapdh	Glyceraldehyde-3-phosphate dehydrogenase	yes	yes	2	0.0041121	133.55	1	4626400	4626400
IPFNSTNKYQL	GSVKLMRERNKKVAEIPFNSTNKYQLSIHE	KVAEIPFNSTNKYQLSIHETEDPNDNRYLL	E	I	P	Q	L	S	0	0	2	0	0	1	0	0	0	1	1	1	0	1	1	1	1	0	1	0	0	0	11		1323.68	Q6PIC6;Q6PIE5;Q8VDN2	Q6PIC6	470	480	Atp1a3;Atp1a2;Atp1a1	Sodium/potassium-transporting ATPase subunit alpha-3;Sodium/potassium-transporting ATPase subunit alpha-2;Sodium/potassium-transporting ATPase subunit alpha-1	no	no	2	1.5883e-08	205.59	1	6675600	6675600
IQTGVDNPGHPYIM	LRAKCTPSGFTLDDAIQTGVDNPGHPYIMT	AIQTGVDNPGHPYIMTVGAVAGDEESYDVF	A	I	Q	I	M	T	0	0	1	1	0	1	0	2	1	2	0	0	1	0	2	0	1	0	1	1	0	0	14		1540.73	Q04447	Q04447	57	70	Ckb	Creatine kinase B-type	yes	yes	2	2.2927e-11	227.2	1	2673100	2673100
IQTGVDNPGHPYIMT	LRAKCTPSGFTLDDAIQTGVDNPGHPYIMT	IQTGVDNPGHPYIMTVGAVAGDEESYDVFK	A	I	Q	M	T	V	0	0	1	1	0	1	0	2	1	2	0	0	1	0	2	0	2	0	1	1	0	0	15		1641.78	Q04447	Q04447	57	71	Ckb	Creatine kinase B-type	yes	yes	2	6.8733e-17	256.31	1	2159400	2159400
IRMPTPPSY	ATPPQEDAPSVDIANIRMPTPPSYKVGDKI	SVDIANIRMPTPPSYKVGDKIATRKAYGLA	N	I	R	S	Y	K	0	1	0	0	0	0	0	0	0	1	0	0	1	0	3	1	1	0	1	0	0	0	9		1060.54	P40142	P40142	301	309	Tkt	Transketolase	yes	yes	2	0.0062376	112.17	1	735590	735590
IRNMFPPNL	GKIVQVTAADAFLDLIRNMFPPNLVEACFK	DAFLDLIRNMFPPNLVEACFKQFKTSYEKR	L	I	R	N	L	V	0	1	2	0	0	0	0	0	0	1	1	0	1	1	2	0	0	0	0	0	0	0	9		1100.58	P56564	P56564	174	182	Slc1a3	Excitatory amino acid transporter 1	yes	yes	2	0.013213	95.531	1	2873100	2873100
IRPLYSNPPLNG	DAEEAKRVESQLKILIRPLYSNPPLNGARI	KILIRPLYSNPPLNGARIAATILTSPDLRK	L	I	R	N	G	A	0	1	2	0	0	0	0	1	0	1	2	0	0	0	3	1	0	0	1	0	0	0	12		1339.72	P05202	P05202	312	323	Got2	Aspartate aminotransferase, mitochondrial	yes	yes	2	0.00087601	138.22	1	1044100	1044100
IRRITTVPLPTAPNVPIIDY	SGDSRLKMRAELGEYIRRITTVPLPTAPNV	TVPLPTAPNVPIIDYEVSISGEWSPWQAKV	Y	I	R	D	Y	E	1	2	1	1	0	0	0	0	0	4	1	0	0	0	4	0	3	0	1	2	0	0	20		2248.29	Q9JHU4	Q9JHU4	2516	2535	Dync1h1	Cytoplasmic dynein 1 heavy chain 1	yes	yes	3	0.0041933	108.92	1	243290	243290
ISGLNPLPNPSY	LLEGEETRFSTGGLSISGLNPLPNPSYLLP	GLSISGLNPLPNPSYLLPPRILSSTASKVS	S	I	S	S	Y	L	0	0	2	0	0	0	0	1	0	1	2	0	0	0	3	2	0	0	1	0	0	0	12		1270.66	P46660	P46660	414	425	Ina	Alpha-internexin	yes	yes	2	0.0049377	105.4	1	859720	859720
ISKIPEQSVL	DPKTCGFDFSGALEDISKIPEQSVLLLHAC	GALEDISKIPEQSVLLLHACAHNPTGVDPR	D	I	S	V	L	L	0	0	0	0	0	1	1	0	0	2	1	1	0	0	1	2	0	0	0	1	0	0	10		1112.64	P05202	P05202	198	207	Got2	Aspartate aminotransferase, mitochondrial	yes	yes	2	0.008289	108.47	1	6838600	6838600
ISKIREEFPDRIMNT	HSLGGGTGSGMGTLLISKIREEFPDRIMNT	ISKIREEFPDRIMNTFSVVPSPKVSDTVVE	L	I	S	N	T	F	0	2	1	1	0	0	2	0	0	3	0	1	1	1	1	1	1	0	0	0	0	0	15		1847.96	Q9D6F9	Q9D6F9	152	166	Tubb4a	Tubulin beta-4A chain	yes	yes	2;3	0.00060685	161.48	2	7214200	7214200
ISKIREEFPDRIMNTF	HSLGGGTGSGMGTLLISKIREEFPDRIMNT	SKIREEFPDRIMNTFSVVPSPKVSDTVVEP	L	I	S	T	F	S	0	2	1	1	0	0	2	0	0	3	0	1	1	2	1	1	1	0	0	0	0	0	16		1995.02	Q9D6F9	Q9D6F9	152	167	Tubb4a	Tubulin beta-4A chain	yes	yes	3	0.01758	87.669	1	3422600	3422600
ISKIREEYPDRIMNT	HSLGGGTGSGMGTLLISKIREEYPDRIMNT	ISKIREEYPDRIMNTFSVVPSPKVSDTVVE	L	I	S	N	T	F	0	2	1	1	0	0	2	0	0	3	0	1	1	0	1	1	1	0	1	0	0	0	15		1863.95	P68372;P99024;Q7TMM9;Q9CWF2;Q922F4	P68372	152	166	Tubb4b;Tubb5;Tubb2a;Tubb2b;Tubb6	Tubulin beta-4B chain;Tubulin beta-5 chain;Tubulin beta-2A chain;Tubulin beta-2B chain;Tubulin beta-6 chain	no	no	2	1.3553e-06	201.09	1	2992100	2992100
ISKIREEYPDRIMNTF	HSLGGGTGSGMGTLLISKIREEYPDRIMNT	SKIREEYPDRIMNTFSVVPSPKVSDTVVEP	L	I	S	T	F	S	0	2	1	1	0	0	2	0	0	3	0	1	1	1	1	1	1	0	1	0	0	0	16		2011.02	P68372;P99024;Q7TMM9;Q9CWF2;Q922F4	P68372	152	167	Tubb4b;Tubb5;Tubb2a;Tubb2b;Tubb6	Tubulin beta-4B chain;Tubulin beta-5 chain;Tubulin beta-2A chain;Tubulin beta-2B chain;Tubulin beta-6 chain	no	no	2;3;4	4.6997e-17	295.78	3	19332000	19332000
ISSGLPKVAVPSTIHCDHLIE	VAMQDATAQMAMLQFISSGLPKVAVPSTIH	KVAVPSTIHCDHLIEAQVGGEKDLRRAKDI	F	I	S	I	E	A	1	0	0	1	1	0	1	1	2	3	2	1	0	0	2	3	1	0	0	2	0	0	21		2215.17	Q99KI0	Q99KI0	111	131	Aco2	Aconitate hydratase, mitochondrial	yes	yes	4	0.014787	91.64	1	1894000	1894000
ISWDGLDPGKL	GKVLTPTQVMNRPSSISWDGLDPGKLYTLV	RPSSISWDGLDPGKLYTLVLTDPDAPSRKD	S	I	S	K	L	Y	0	0	0	2	0	0	0	2	0	1	2	1	0	0	1	1	0	1	0	0	0	0	11		1199.62	P70296;Q8VIN1	P70296	53	63	Pebp1;Pbp2	Phosphatidylethanolamine-binding protein 1;Hippocampal cholinergic neurostimulating peptide;Phosphatidylethanolamine-binding protein 2	yes	no	2	0.001024	139.39	1	5756700	5756700
ITNFPIPGEPGFPLNA	CNSKSQGEKEMYTLGITNFPIPGEPGFPLN	TNFPIPGEPGFPLNAIYAKPASKQEDEMMR	G	I	T	N	A	I	1	0	2	0	0	0	1	2	0	2	1	0	0	2	4	0	1	0	0	0	0	0	16		1682.87	Q9JM76	Q9JM76	100	115	Arpc3	Actin-related protein 2/3 complex subunit 3	yes	yes	2	9.8921e-07	167.71	1	706600	706600
IVHLQAGQCGNQIG	______________________________	EIVHLQAGQCGNQIGAKFWEVISDEHGIDP	E	I	V	I	G	A	1	0	1	0	1	3	0	3	1	2	1	0	0	0	0	0	0	0	0	1	0	0	14		1436.72	P68372;Q9D6F9	P68372	4	17	Tubb4b;Tubb4a	Tubulin beta-4B chain;Tubulin beta-4A chain	no	no	2	0.02837	84.17	1	4178200	4178200
IVHLTLPDGTKRSGQVL	PLVILDHVKFPRYAEIVHLTLPDGTKRSGQ	HLTLPDGTKRSGQVLEVSGSKAVVQVFEGT	E	I	V	V	L	E	0	1	0	1	0	1	0	2	1	1	3	1	0	0	1	1	2	0	0	2	0	0	17		1833.05	P62814	P62814	71	87	Atp6v1b2	V-type proton ATPase subunit B, brain isoform	yes	yes	3;4	0.0087039	104.45	2	5040100	5040100
IVIPWNYPLM	RNLTLTKKEPVGVCGIVIPWNYPLMMLSWK	VGVCGIVIPWNYPLMMLSWKTAACLAAGNT	G	I	V	L	M	M	0	0	1	0	0	0	0	0	0	2	1	0	1	0	2	0	0	1	1	1	0	0	10		1244.66	Q8R0Y6	Q8R0Y6	569	578	Aldh1l1	Cytosolic 10-formyltetrahydrofolate dehydrogenase	yes	yes	2	0.028117	83.843	1	107700	107700
IVISRPAWL	ECTYISIDQVPRTHAIVISRPAWLWGAEMG	VPRTHAIVISRPAWLWGAEMGANEHGVCIA	A	I	V	W	L	W	1	1	0	0	0	0	0	0	0	2	1	0	0	0	1	1	0	1	0	1	0	0	9		1053.63	Q9CZC8	Q9CZC8	68	76	Scrn1	Secernin-1	yes	yes	2	0.023528	91.853	1	872940	872940
IVIVLGHHLGKDFTPAAQ	KLHVDPENFRLLGNMIVIVLGHHLGKDFTP	VLGHHLGKDFTPAAQAAFQKVVAGVATALA	M	I	V	A	Q	A	2	0	0	1	0	1	0	2	2	2	2	1	0	1	1	0	1	0	0	2	0	0	18		1915.07	P02088;P02089	P02088	111	128	Hbb-b1;Hbb-b2	Hemoglobin subunit beta-1;Hemoglobin subunit beta-2	yes	no	3	0.00037813	129.88	1	2165200	2165200
IVLGHHLGKDFTPAAQAA	HVDPENFRLLGNMIVIVLGHHLGKDFTPAA	GHHLGKDFTPAAQAAFQKVVAGVATALAHK	V	I	V	A	A	F	4	0	0	1	0	1	0	2	2	1	2	1	0	1	1	0	1	0	0	1	0	0	18		1844.99	P02088;P02089	P02088	113	130	Hbb-b1;Hbb-b2	Hemoglobin subunit beta-1;Hemoglobin subunit beta-2	yes	no	2;3	0.00012307	176.91	2	8132200	8132200
IVNTNVPRASVPEGF	______________________________	IVNTNVPRASVPEGFLSELTQQLAQATGKP	F	I	V	G	F	L	1	1	2	0	0	0	1	1	0	1	0	0	0	1	2	1	1	0	0	3	0	0	15		1598.84	P34884	P34884	5	19	Mif	Macrophage migration inhibitory factor	yes	yes	2	0.00015814	132.79	2	0	0
IVRIGEKYVDM	LKLEIKTDPSIMGGMIVRIGEKYVDMSAKS	MGGMIVRIGEKYVDMSAKSKIQKLSKAMRE	M	I	V	D	M	S	0	1	0	1	0	0	1	1	0	2	0	1	1	0	0	0	0	0	1	2	0	0	11		1321.71	Q9DB20	Q9DB20	186	196	Atp5o	ATP synthase subunit O, mitochondrial	yes	yes	3	0.0296	81.92	1	854030	854030
IWFGTPEGEF	SAMSAAKAIADHIRDIWFGTPEGEFVSMGV	DHIRDIWFGTPEGEFVSMGVISDGNSYGVP	D	I	W	E	F	V	0	0	0	0	0	0	2	2	0	1	0	0	0	2	1	0	1	1	0	0	0	0	10		1181.54	P14152	P14152	257	266	Mdh1	Malate dehydrogenase, cytoplasmic	yes	yes	2	9.1831e-05	157.21	1	1548600	1548600
IYTNYENGKNDYVKALPGHLKPFETL	VNDGVEDLRGKYVTLIYTNYENGKNDYVKA	YVKALPGHLKPFETLLSQNQGGKAFIVGDQ	L	I	Y	T	L	L	1	0	3	1	0	0	2	2	1	1	3	3	0	1	2	0	2	0	3	1	0	0	26		3023.54	P19157	P19157	108	133	Gstp1	Glutathione S-transferase P 1	yes	yes	4;5	5.7566e-14	215.08	2	5882800	5882800
KALLSYPLPFF	LPGSIRAVVNLFLVAKALLSYPLPFFAAVE	FLVAKALLSYPLPFFAAVEVLEKSLFQEGS	A	K	A	F	F	A	1	0	0	0	0	0	0	0	0	0	3	1	0	2	2	1	0	0	1	0	0	0	11		1294.73	O35633	O35633	389	399	Slc32a1	Vesicular inhibitory amino acid transporter	yes	yes	2	0.0098378	105.78	1	93549	93549
KAVVGEKIMHDVIKKVKKKGEWKVL	______________________________	DVIKKVKKKGEWKVLVVDQLSMRMLSSCCK	L	K	A	V	L	V	1	0	0	1	0	0	2	2	1	2	1	8	1	0	0	0	0	1	0	5	0	0	25		2889.74	O08599	O08599	7	31	Stxbp1	Syntaxin-binding protein 1	yes	yes	5	0.0082469	96.793	1	4886300	4886300
KEDGVRGLAKGWAPTL	PQKYKGIFNGFSITLKEDGVRGLAKGWAPT	EDGVRGLAKGWAPTLIGYSMQGLCKFGFYE	L	K	E	T	L	I	2	1	0	1	0	0	1	3	0	0	2	2	0	0	1	0	1	1	0	1	0	0	16		1696.93	Q8VEM8	Q8VEM8	107	122	Slc25a3	Phosphate carrier protein, mitochondrial	yes	yes	3	0.013304	99.451	1	3923700	3923700
KFIIPNIVKYSPHCKL	GESRLNLVQRNVNIFKFIIPNIVKYSPHCK	FIIPNIVKYSPHCKLLIVSNPVDILTYVAW	F	K	F	K	L	L	0	0	1	0	1	0	0	0	1	3	1	3	0	1	2	1	0	0	1	1	0	0	16		1899.08	P06151	P06151	118	133	Ldha	L-lactate dehydrogenase A chain	yes	yes	4	0.00022094	144.73	1	3673300	3673300
KFIIPQIVKY	GESRLNLVQRNVNVFKFIIPQIVKYSPDCT	NVNVFKFIIPQIVKYSPDCTIIVVSNPVDI	F	K	F	K	Y	S	0	0	0	0	0	1	0	0	0	3	0	2	0	1	1	0	0	0	1	1	0	0	10		1247.76	P16125	P16125	119	128	Ldhb	L-lactate dehydrogenase B chain	yes	yes	3	0.0023131	128.27	1	960970	960970
KFIIPQIVKYSPDCT	GESRLNLVQRNVNVFKFIIPQIVKYSPDCT	KFIIPQIVKYSPDCTIIVVSNPVDILTYVT	F	K	F	C	T	I	0	0	0	1	1	1	0	0	0	3	0	2	0	1	2	1	1	0	1	1	0	0	15		1750.93	P16125	P16125	119	133	Ldhb	L-lactate dehydrogenase B chain	yes	yes	3	0.026399	85.006	1	1226800	1226800
KFIIPQIVKYSPDCTI	GESRLNLVQRNVNVFKFIIPQIVKYSPDCT	FIIPQIVKYSPDCTIIVVSNPVDILTYVTW	F	K	F	T	I	I	0	0	0	1	1	1	0	0	0	4	0	2	0	1	2	1	1	0	1	1	0	0	16		1864.02	P16125	P16125	119	134	Ldhb	L-lactate dehydrogenase B chain	yes	yes	3	0.00064507	132.44	1	1766000	1766000
KFLPFSF	HWVEFQNKFYTGTGFKFLPFSFEHIREGKF	KFYTGTGFKFLPFSFEHIREGKFDE_____	F	K	F	S	F	E	0	0	0	0	0	0	0	0	0	0	1	1	0	3	1	1	0	0	0	0	0	0	7		884.48	Q9Z1G4	Q9Z1G4	823	829	Atp6v0a1	V-type proton ATPase 116 kDa subunit a isoform 1	yes	yes	2	0.016551	108.24	1	748030	748030
KGQEVSPKVYF	TAQHENFRKKQIEELKGQEVSPKVYFMKQT	IEELKGQEVSPKVYFMKQTIGNSCGTIGLI	L	K	G	Y	F	M	0	0	0	0	0	1	1	1	0	0	0	2	0	1	1	1	0	0	1	2	0	0	11		1280.68	Q9R0P9	Q9R0P9	71	81	Uchl1	Ubiquitin carboxyl-terminal hydrolase isozyme L1	yes	yes	2	0.031769	70.1	1	0	0
KIKIIAPPERKYSVW	DRMQKEITALAPSTMKIKIIAPPERKYSVW	KIKIIAPPERKYSVWIGGSILASLSTFQQM	M	K	I	V	W	I	1	1	0	0	0	0	1	0	0	3	0	3	0	0	2	1	0	1	1	1	0	0	15		1827.08	P63260;P60710;Q8BFZ3;P63268;P68134;P68033;P62737	P63260	326	340	Actg1;Actb;Actbl2;Actg2;Acta1;Actc1;Acta2	Actin, cytoplasmic 2;Actin, cytoplasmic 2, N-terminally processed;Actin, cytoplasmic 1;Actin, cytoplasmic 1, N-terminally processed;Beta-actin-like protein 2;Actin, gamma-enteric smooth muscle;Actin, alpha skeletal muscle;Actin, alpha cardiac muscle 1;Actin, aortic smooth muscle	yes	no	2;3;4	6.238e-07	182.07	3	39695000	39695000
KILIRPLYSNPPLNG	VCKDAEEAKRVESQLKILIRPLYSNPPLNG	KILIRPLYSNPPLNGARIAATILTSPDLRK	L	K	I	N	G	A	0	1	2	0	0	0	0	1	0	2	3	1	0	0	3	1	0	0	1	0	0	0	15		1693.99	P05202	P05202	309	323	Got2	Aspartate aminotransferase, mitochondrial	yes	yes	2;3	4.2703e-11	216.84	2	8812700	8812700
KLLSHCLL	SDLHAHKLRVDPVNFKLLSHCLLVTLASHH	RVDPVNFKLLSHCLLVTLASHHPADFTPAV	F	K	L	L	L	V	0	0	0	0	1	0	0	0	1	0	4	1	0	0	0	1	0	0	0	0	0	0	8		925.542	P01942;P06467	P01942	100	107	Hba;Hbz	Hemoglobin subunit alpha;Hemoglobin subunit zeta	yes	no	2	0.020241	98.418	1	11485000	11485000
KSDGLKGLYQGF	QREFNGLGDCLTKIFKSDGLKGLYQGFSVS	KIFKSDGLKGLYQGFSVSVQGIIIYRAAYF	F	K	S	G	F	S	0	0	0	1	0	1	0	3	0	0	2	2	0	1	0	1	0	0	1	0	0	0	12		1311.68	P48962	P48962	166	177	Slc25a4	ADP/ATP translocase 1	yes	yes	2	0.012499	115.91	1	525520	525520
KVGINYQPPTVVPGGD	TKRTIQFVDWCPTGFKVGINYQPPTVVPGG	VGINYQPPTVVPGGDLAKVQRAVCMLSNTT	F	K	V	G	D	L	0	0	1	1	0	1	0	3	0	1	0	1	0	0	3	0	1	0	1	3	0	0	16		1639.86	P68373;P68369;P05213;P05214;Q9JJZ2	P68373	352	367	Tuba1c;Tuba1a;Tuba1b;Tuba3a;Tuba8	Tubulin alpha-1C chain;Tubulin alpha-1A chain;Tubulin alpha-1B chain;Tubulin alpha-3 chain;Tubulin alpha-8 chain	no	no	2	4.4364e-13	234.63	1	16727000	16727000
KVGINYQPPTVVPGGDL	TKRTIQFVDWCPTGFKVGINYQPPTVVPGG	GINYQPPTVVPGGDLAKVQRAVCMLSNTTA	F	K	V	D	L	A	0	0	1	1	0	1	0	3	0	1	1	1	0	0	3	0	1	0	1	3	0	0	17		1752.94	P68373;P68369;P05213;P05214;Q9JJZ2	P68373	352	368	Tuba1c;Tuba1a;Tuba1b;Tuba3a;Tuba8	Tubulin alpha-1C chain;Tubulin alpha-1A chain;Tubulin alpha-1B chain;Tubulin alpha-3 chain;Tubulin alpha-8 chain	no	no	2;3	1.1859e-17	268.08	2	70652000	70652000
KVGINYQPPTVVPGGDLA	TKRTIQFVDWCPTGFKVGINYQPPTVVPGG	INYQPPTVVPGGDLAKVQRAVCMLSNTTAI	F	K	V	L	A	K	1	0	1	1	0	1	0	3	0	1	1	1	0	0	3	0	1	0	1	3	0	0	18		1823.98	P68373;P68369;P05213;P05214;Q9JJZ2	P68373	352	369	Tuba1c;Tuba1a;Tuba1b;Tuba3a;Tuba8	Tubulin alpha-1C chain;Tubulin alpha-1A chain;Tubulin alpha-1B chain;Tubulin alpha-3 chain;Tubulin alpha-8 chain	no	no	2	0.01247	98.974	1	1320500	1320500
KVIPELNGKLTGMA	QNIIPASTGAAKAVGKVIPELNGKLTGMAF	GKVIPELNGKLTGMAFRVPTPNVSVVDLTC	G	K	V	M	A	F	1	0	1	0	0	0	1	2	0	1	2	2	1	0	1	0	1	0	0	1	0	0	14		1469.83	P16858	P16858	217	230	Gapdh	Glyceraldehyde-3-phosphate dehydrogenase	yes	yes	2;3	0.00094723	123.28	2	8585900	8585900
KVKTPWELKWTKIYLPHSLPQQ	QTFPLAPSPKSLTTMKVKTPWELKWTKIYL	LKWTKIYLPHSLPQQ_______________	M	K	V	Q	Q	-	0	0	0	0	0	2	1	0	1	1	3	4	0	0	3	1	2	2	1	1	0	0	22		2719.52	P03930	P03930	46	67	Mtatp8	ATP synthase protein 8	yes	yes	4	0.021695	77.97	1	1357600	1357600
LAENGRLGNTQGIISA	KREKFSPLTANLMNLLAENGRLGNTQGIIS	AENGRLGNTQGIISAFSTIMSVHRGEVPCT	L	L	A	S	A	F	2	1	2	0	0	1	1	3	0	2	2	0	0	0	0	1	1	0	0	0	0	0	16		1612.85	Q9DB20	Q9DB20	112	127	Atp5o	ATP synthase subunit O, mitochondrial	yes	yes	2	0.010473	102.87	1	1622300	1622300
LAGNPEVILPVPAF	GAVEKGVPLYRHIADLAGNPEVILPVPAFN	DLAGNPEVILPVPAFNVINGGSHAGNKLAM	D	L	A	A	F	N	2	0	1	0	0	0	1	1	0	1	2	0	0	1	3	0	0	0	0	2	0	0	14		1435.81	P17182	P17182	137	150	Eno1	Alpha-enolase	yes	yes	2	0.015743	98.249	1	734440	734440
LAGPLHGLANQ	ALSDPYLSFAAAMNGLAGPLHGLANQEVLV	AMNGLAGPLHGLANQEVLVWLTQLQKEVGK	G	L	A	N	Q	E	2	0	1	0	0	1	0	2	1	0	3	0	0	0	1	0	0	0	0	0	0	0	11		1089.59	Q9CZU6	Q9CZU6	296	306	Cs	Citrate synthase, mitochondrial	yes	yes	2	0.00042123	129.68	1	0	0
LAIAGTLKFNPETDF	PETHAFVTSPEIVTALAIAGTLKFNPETDF	LAIAGTLKFNPETDFLTGKDGKKFKLEAPD	A	L	A	D	F	L	2	0	1	1	0	0	1	1	0	1	2	1	0	2	1	0	2	0	0	0	0	0	15		1635.85	Q99KI0	Q99KI0	499	513	Aco2	Aconitate hydratase, mitochondrial	yes	yes	2	2.2885e-05	146.07	1	119800	119800
LAPLAKVIHDNF	NSLKIVSNASCTTNCLAPLAKVIHDNFGIV	TNCLAPLAKVIHDNFGIVEGLMTTVHAITA	C	L	A	N	F	G	2	0	1	1	0	0	0	0	1	1	2	1	0	1	1	0	0	0	0	1	0	0	12		1336.75	P16858	P16858	155	166	Gapdh	Glyceraldehyde-3-phosphate dehydrogenase	yes	yes	2	0.0002962	155	1	0	0
LATAGAKYGVGF	DLRRAKDINQEVYNFLATAGAKYGVGFWRP	YNFLATAGAKYGVGFWRPGSGIIHQIILEN	F	L	A	G	F	W	3	0	0	0	0	0	0	3	0	0	1	1	0	1	0	0	1	0	1	1	0	0	12		1153.61	Q99KI0	Q99KI0	154	165	Aco2	Aconitate hydratase, mitochondrial	yes	yes	2	0.0097709	105.52	1	2240600	2240600
LATASTMDHARHGFLPRHRDTGIL	DVMASQKRPSQRSKYLATASTMDHARHGFL	ARHGFLPRHRDTGILDSIGRFFSGDRGAPK	Y	L	A	I	L	D	3	3	0	2	0	0	0	2	3	1	3	0	1	1	1	1	3	0	0	0	0	0	24		2672.37	P04370	P04370	147	170	Mbp	Myelin basic protein	yes	yes	4;5	0.01232	90.193	2	39936000	39936000
LAYPSISASGATPVFDNL	PGSFLYYAPFDGILGLAYPSISASGATPVF	PSISASGATPVFDNLWDQGLVSQDLFSVYL	G	L	A	N	L	W	3	0	1	1	0	0	0	1	0	1	2	0	0	1	2	3	1	0	1	1	0	0	18		1821.91	P00791	P00791	182	199			yes	yes	2	3.4726e-43	373.87	1	2314400	2314400
LDKNLKPIKPMQF	IMELNLPTGIPIVYELDKNLKPIKPMQFLG	YELDKNLKPIKPMQFLGDEETVRKAMEAVA	E	L	D	Q	F	L	0	0	1	1	0	1	0	0	0	1	2	3	1	1	2	0	0	0	0	0	0	0	13		1570.89	Q9DBJ1	Q9DBJ1	220	232	Pgam1	Phosphoglycerate mutase 1	yes	yes	2;3	2.5898e-07	170.52	2	6688300	6688300
LDYVPIGPRF	KSQLSCVVVDDIERLLDYVPIGPRFSNLVL	DIERLLDYVPIGPRFSNLVLQALLVLLKKA	L	L	D	R	F	S	0	1	0	1	0	0	0	1	0	1	1	0	0	1	2	0	0	0	1	1	0	0	10		1175.63	P46460	P46460	609	618	Nsf	Vesicle-fusing ATPase	yes	yes	2	0.031036	80.219	1	1911200	1911200
LEIAPHLSAPLPIM	QYRMVKEALHERANLLEIAPHLSAPLPIML	LLEIAPHLSAPLPIMLPLYKWWQLPYYWVG	L	L	E	I	M	L	2	0	0	0	0	0	1	0	1	2	3	0	1	0	3	1	0	0	0	0	0	0	14		1500.84	Q64521	Q64521	148	161	Gpd2	Glycerol-3-phosphate dehydrogenase, mitochondrial	yes	yes	2	2.395e-17	269.99	1	857080	857080
LEKFLIPNASQPESKVF	IETELRDICNDVLSLLEKFLIPNASQPESK	KFLIPNASQPESKVFYLKMKGDYYRYLAEV	L	L	E	V	F	Y	1	0	1	0	0	1	2	0	0	1	2	2	0	2	2	2	0	0	0	1	0	0	17		1946.05	P63101	P63101	101	117	Ywhaz	14-3-3 protein zeta/delta	yes	yes	3	0.022076	87.654	1	2941800	2941800
LEKFLIPNASQPESKVFY	IETELRDICNDVLSLLEKFLIPNASQPESK	FLIPNASQPESKVFYLKMKGDYYRYLAEVA	L	L	E	F	Y	L	1	0	1	0	0	1	2	0	0	1	2	2	0	2	2	2	0	0	1	1	0	0	18		2109.11	P63101	P63101	101	118	Ywhaz	14-3-3 protein zeta/delta	yes	yes	2;3	9.6255e-12	215.48	2	20919000	20919000
LELGGLGE	QPLDEEMKEAFQNAYLELGGLGERVLGFCH	EAFQNAYLELGGLGERVLGFCHYYLPEEQF	Y	L	E	G	E	R	0	0	0	0	0	0	2	3	0	0	3	0	0	0	0	0	0	0	0	0	0	0	8		786.412	Q6PIC6;Q8VDN2	Q6PIC6	533	540	Atp1a3;Atp1a1	Sodium/potassium-transporting ATPase subunit alpha-3;Sodium/potassium-transporting ATPase subunit alpha-1	no	no	1	0.0064016	119.07	1	2024600	2024600
LENPKKYIPGTKMIF	KNKGITWGEDTLMEYLENPKKYIPGTKMIF	LENPKKYIPGTKMIFAGIKKKGERADLIAY	Y	L	E	I	F	A	0	0	1	0	0	0	1	1	0	2	1	3	1	1	2	0	1	0	1	0	0	0	15		1777.98	P62897;P00015	P62897	69	83	Cycs;Cyct	Cytochrome c, somatic;Cytochrome c, testis-specific	yes	no	4	0.010011	93.478	1	939440	939440
LEQGKAKNPWPNVDAHSGVL	FKLVAQLYKIVPNILLEQGKAKNPWPNVDA	AKNPWPNVDAHSGVLLQYYGMTEMNYYTVL	L	L	E	V	L	L	2	0	2	1	0	1	1	2	1	0	2	2	0	0	2	1	0	1	0	2	0	0	20		2159.11	Q9CZU6	Q9CZU6	389	408	Cs	Citrate synthase, mitochondrial	yes	yes	3	0.0096171	100.95	1	741270	741270
LESPERPFL	GGFLMKKELNYFAKALESPERPFLAILGGA	NYFAKALESPERPFLAILGGAKVADKIQLI	A	L	E	F	L	A	0	1	0	0	0	0	2	0	0	0	2	0	0	1	2	1	0	0	0	0	0	0	9		1086.57	P09411	P09411	201	209	Pgk1	Phosphoglycerate kinase 1	yes	yes	2	0.031887	81.548	1	1091800	1091800
LFDKPVSPLL	SMTEAEQQQLIDDHFLFDKPVSPLLLASGM	IDDHFLFDKPVSPLLLASGMARDWPDARGI	F	L	F	L	L	L	0	0	0	1	0	0	0	0	0	0	3	1	0	1	2	1	0	0	0	1	0	0	10		1127.66	Q04447;P07310;Q6P8J7;P30275	Q04447	193	202	Ckb;Ckm;Ckmt2;Ckmt1	Creatine kinase B-type;Creatine kinase M-type;Creatine kinase S-type, mitochondrial;Creatine kinase U-type, mitochondrial	no	no	2	0.00028764	152.34	1	9697800	9697800
LFRPDNF	EPGTMDSVRSGPFGQLFRPDNFIFGQTGAG	VRSGPFGQLFRPDNFIFGQTGAGNNWAKGH	Q	L	F	N	F	I	0	1	1	1	0	0	0	0	0	0	1	0	0	2	1	0	0	0	0	0	0	0	7		907.455	Q922F4;Q9ERD7	Q922F4	84	90	Tubb6;Tubb3	Tubulin beta-6 chain;Tubulin beta-3 chain	no	no	2	0.037321	86.872	1	4468500	4468500
LGITGPEGHVLSRPEE	ENGDIIAEEQQRILDLGITGPEGHVLSRPE	GITGPEGHVLSRPEEVEAEAVNRSITIANQ	D	L	G	E	E	V	0	1	0	0	0	0	3	3	1	1	2	0	0	0	2	1	1	0	0	1	0	0	16		1689.87	O08553	O08553	215	230	Dpysl2	Dihydropyrimidinase-related protein 2	yes	yes	3	0.0012538	114.01	1	4177100	4177100
LGKKGLEKNLGIGKITPFE	QSKETECTYFSTPLLLGKKGLEKNLGIGKI	GLEKNLGIGKITPFEEKMIAEAIPELKASI	L	L	G	F	E	E	0	0	1	0	0	0	2	4	0	2	3	4	0	1	1	0	1	0	0	0	0	0	19		2041.19	P08249	P08249	294	312	Mdh2	Malate dehydrogenase, mitochondrial	yes	yes	3	0.00041513	121.21	1	2655400	2655400
LGLGAGLPQPLQKPLL	LPFPLLLTALAALTLLGLGAGLPQPLQKPL	GLGAGLPQPLQKPLLLGIVAPVHGTCLLAT	L	L	G	L	L	L	1	0	0	0	0	2	0	3	0	0	6	1	0	0	3	0	0	0	0	0	0	0	16		1613.99	Q6PE13	Q6PE13	548	563	Prrt3	Proline-rich transmembrane protein 3	yes	yes	2	0.021391	89.679	1	331050	331050
LGLLPHTFTPTTQ	LMIVSLIMFIGSTNLLGLLPHTFTPTTQLS	NLLGLLPHTFTPTTQLSMNLSMAIPLWAGA	L	L	G	T	Q	L	0	0	0	0	0	1	0	1	1	0	3	0	0	1	2	0	4	0	0	0	0	0	13		1424.77	P00848	P00848	85	97	Mtatp6	ATP synthase subunit a	yes	yes	2	0.013961	100.48	1	954470	954470
LGLLPHTFTPTTQL	LMIVSLIMFIGSTNLLGLLPHTFTPTTQLS	LLGLLPHTFTPTTQLSMNLSMAIPLWAGAV	L	L	G	Q	L	S	0	0	0	0	0	1	0	1	1	0	4	0	0	1	2	0	4	0	0	0	0	0	14		1537.85	P00848	P00848	85	98	Mtatp6	ATP synthase subunit a	yes	yes	2	1.2649e-16	248.42	1	4349700	4349700
LGRIPSAVGYQPTL	NIFRFTQAGSEVSALLGRIPSAVGYQPTLA	LLGRIPSAVGYQPTLATDMGTMQERITTTK	L	L	G	T	L	A	1	1	0	0	0	1	0	2	0	1	2	0	0	0	2	1	1	0	1	1	0	0	14		1470.82	P56480	P56480	322	335	Atp5b	ATP synthase subunit beta, mitochondrial	yes	yes	2	1.8374e-06	190.1	1	15180000	15180000
LIGTDSHTPNGGGLGGIC	IHQIILENYAYPGVLLIGTDSHTPNGGGLG	TDSHTPNGGGLGGICIGVGGADAVDVMAGI	L	L	I	I	C	I	0	0	1	1	1	0	0	6	1	2	2	0	0	0	1	1	2	0	0	0	0	0	18		1667.79	Q99KI0	Q99KI0	188	205	Aco2	Aconitate hydratase, mitochondrial	yes	yes	2	4.7173e-07	169.82	1	1439200	1439200
LIIHGGIF	VARQLGMYMITVIVGLIIHGGIFLPLIYFV	MITVIVGLIIHGGIFLPLIYFVVTRKNPFS	G	L	I	I	F	L	0	0	0	0	0	0	0	2	1	3	1	0	0	1	0	0	0	0	0	0	0	0	8		868.517	P43006	P43006	323	330	Slc1a2	Excitatory amino acid transporter 2	yes	yes	2	0.00045207	136.94	1	3120600	3120600
LIKGGKIVNDDQSF	YQGKKNIPRITSDRLLIKGGKIVNDDQSFY	LLIKGGKIVNDDQSFYADIYMEDGLIKQIG	L	L	I	S	F	Y	0	0	1	2	0	1	0	2	0	2	1	2	0	1	0	1	0	0	0	1	0	0	14		1532.82	O08553;O35098	O08553	18	31	Dpysl2;Dpysl4	Dihydropyrimidinase-related protein 2;Dihydropyrimidinase-related protein 4	yes	no	2	6.846e-05	152.4	1	3321000	3321000
LILPVPAF	LPLYRHIAQLAGNSDLILPVPAFNVINGGS	QLAGNSDLILPVPAFNVINGGSHAGNKLAM	D	L	I	A	F	N	1	0	0	0	0	0	0	0	0	1	2	0	0	1	2	0	0	0	0	1	0	0	8		868.542	P17183	P17183	143	150	Eno2	Gamma-enolase	yes	yes	2	0.00072005	157.88	2	1991500	1991500
LINNVAKAHGGYSVF	LFGGAGVGKTVLIMELINNVAKAHGGYSVF	LINNVAKAHGGYSVFAGVGERTREGNDLYH	E	L	I	V	F	A	2	0	2	0	0	0	0	2	1	1	1	1	0	1	0	1	0	0	1	2	0	0	15		1588.84	P56480	P56480	219	233	Atp5b	ATP synthase subunit beta, mitochondrial	yes	yes	2	1.698e-06	158.05	1	894390	894390
LIPNASQPESKVFY	LRDICNDVLSLLEKFLIPNASQPESKVFYL	FLIPNASQPESKVFYLKMKGDYYRYLAEVA	F	L	I	F	Y	L	1	0	1	0	0	1	1	0	0	1	1	1	0	1	2	2	0	0	1	1	0	0	14		1591.82	P63101	P63101	105	118	Ywhaz	14-3-3 protein zeta/delta	yes	yes	2	0.032697	98.902	1	1844300	1844300
LIPWVQKPIIF	FRGVQDIVVGEGTHFLIPWVQKPIIFDCRS	GTHFLIPWVQKPIIFDCRSRPRNVPVITGS	F	L	I	I	F	D	0	0	0	0	0	1	0	0	0	3	1	1	0	1	2	0	0	1	0	1	0	0	11		1352.82	P67778	P67778	57	67	Phb	Prohibitin	yes	yes	2	2.0945e-08	196.25	1	969390	969390
LIVPFGLL	YNHITTRVNSEQEHFLIVPFGLLYSEVTAS	NSEQEHFLIVPFGLLYSEVTASSLVKVNLQ	F	L	I	L	L	Y	0	0	0	0	0	0	0	1	0	1	3	0	0	1	1	0	0	0	0	1	0	0	8		870.558	Q9QYC0	Q9QYC0	181	188	Add1	Alpha-adducin	yes	yes	2	0.00072005	157.88	1	39819	39819
LIVPGGVKTIE	DIYMEDGLIKQIGENLIVPGGVKTIEAHSR	IGENLIVPGGVKTIEAHSRMVIPGGIDVHT	N	L	I	I	E	A	0	0	0	0	0	0	1	2	0	2	1	1	0	0	1	0	1	0	0	2	0	0	11		1124.68	O08553;Q62188;P97427	O08553	49	59	Dpysl2;Dpysl3;Crmp1	Dihydropyrimidinase-related protein 2;Dihydropyrimidinase-related protein 3;Dihydropyrimidinase-related protein 1	no	no	2	0.0013283	134.77	1	3870800	3870800
LKESAPFAVIGSN	CDSDEDEDFKQQDRELKESAPFAVIGSNTV	RELKESAPFAVIGSNTVVEAKGQRVRGRLY	E	L	K	S	N	T	2	0	1	0	0	0	1	1	0	1	1	1	0	1	1	2	0	0	0	1	0	0	13		1331.71	Q9Z2Q6	Q9Z2Q6	238	250	2023-09-05	Septin-5	yes	yes	2	0.022056	91.307	1	877890	877890
LKIPVPEDKY	AKPGLVDDFEKKYNALKIPVPEDKYTALVD	KKYNALKIPVPEDKYTALVDQEEKEDVKSC	A	L	K	K	Y	T	0	0	0	1	0	0	1	0	0	1	1	2	0	0	2	0	0	0	1	1	0	0	10		1200.68	Q9DCX2	Q9DCX2	77	86	Atp5h	ATP synthase subunit d, mitochondrial	yes	yes	3	0.032429	78.488	1	1710300	1710300
LKTPLEKNAPVL	FEQLLSGAHWMDQHFLKTPLEKNAPVLLAL	QHFLKTPLEKNAPVLLALLGIWYINCYGCE	F	L	K	V	L	L	1	0	1	0	0	0	1	0	0	0	3	2	0	0	2	0	1	0	0	1	0	0	12		1321.8	P06745	P06745	308	319	Gpi	Glucose-6-phosphate isomerase	yes	yes	2	0.0019832	117.14	1	1846400	1846400
LKWIEDGIPKDPFLNPDL	LAFKREMSSKTIPELLKWIEDGIPKDPFLN	IEDGIPKDPFLNPDLMKNNPWVEKAKCTIL	L	L	K	D	L	M	0	0	1	3	0	0	1	1	0	2	3	2	0	1	3	0	0	1	0	0	0	0	18		2109.11	Q9JMF3	Q9JMF3	35	52	Gng13	Guanine nucleotide-binding protein G(I)/G(S)/G(O) subunit gamma-13	yes	yes	3	0.014296	78.021	1	281070	281070
LLEPIDQKF	VETAEPEKEVEPALELLEPIDQKFVAISDL	VEPALELLEPIDQKFVAISDLYEPIDDGSE	E	L	L	K	F	V	0	0	0	1	0	1	1	0	0	1	2	1	0	1	1	0	0	0	0	0	0	0	9		1101.61	P50396	P50396	372	380	Gdi1	Rab GDP dissociation inhibitor alpha	yes	yes	2	0.0038902	125.47	1	2185600	2185600
LLFPLTAQHENF	EETLGSVPSPACALLLLFPLTAQHENFRKK	ALLLLFPLTAQHENFRKKQIEELKGQEVSP	L	L	L	N	F	R	1	0	1	0	0	1	1	0	1	0	3	0	0	2	1	0	1	0	0	0	0	0	12		1428.74	Q9R0P9	Q9R0P9	51	62	Uchl1	Ubiquitin carboxyl-terminal hydrolase isozyme L1	yes	yes	2	0.01632	89.827	1	255390	255390
LLKNSPLVSRL	AVLGASGGIGQPLSLLLKNSPLVSRLTLYD	PLSLLLKNSPLVSRLTLYDIAHTPGVAADL	L	L	L	R	L	T	0	1	1	0	0	0	0	0	0	0	4	1	0	0	1	2	0	0	0	1	0	0	11		1238.77	P08249	P08249	43	53	Mdh2	Malate dehydrogenase, mitochondrial	yes	yes	2;3	2.415e-05	132.14	2	8478700	8478700
LLLAAGLPLQ	______________________________	GVLGFLLLAAGLPLQAAKRFRDVLGHEQYP	F	L	L	L	Q	A	2	0	0	0	0	1	0	1	0	0	5	0	0	0	1	0	0	0	0	0	0	0	10		1007.64	Q99P91	Q99P91	11	20	Gpnmb	Transmembrane glycoprotein NMB	yes	yes	2	0.02799	83.801	1	798110	798110
LLVPDGGKVEGGTPLF	TSVQVPSPANGIIEALLVPDGGKVEGGTPL	LVPDGGKVEGGTPLFTLRKTGAAPAKAKPA	A	L	L	L	F	T	0	0	0	1	0	0	1	4	0	0	3	1	0	1	2	0	1	0	0	2	0	0	16		1597.87	Q9D2G2	Q9D2G2	127	142	Dlst	Dihydrolipoyllysine-residue succinyltransferase component of 2-oxoglutarate dehydrogenase complex, mitochondrial	yes	yes	2	3.8049e-07	184.34	1	863010	863010
LMPPLPFF	QSPTATEIPGPLGSGLMPPLPFFNKQKAID	PGPLGSGLMPPLPFFNKQKAIDLLYWRDIK	G	L	M	F	F	N	0	0	0	0	0	0	0	0	0	0	2	0	1	2	3	0	0	0	0	0	0	0	8		960.514	Q8K0T0	Q8K0T0	581	588	Rtn1	Reticulon-1	yes	yes	2	0.0017489	148.49	1	62958	62958
LNLPTGIPIVY	IVKHLEGLSEEAIMELNLPTGIPIVYELDK	AIMELNLPTGIPIVYELDKNLKPIKPMQFL	E	L	N	V	Y	E	0	0	1	0	0	0	0	1	0	2	2	0	0	0	2	0	1	0	1	1	0	0	11		1198.7	Q9DBJ1;O70250	Q9DBJ1	208	218	Pgam1;Pgam2	Phosphoglycerate mutase 1;Phosphoglycerate mutase 2	yes	no	2	6.8004e-06	183.65	1	2816700	2816700
LQALGGF				L	Q	G	F		1	0	0	0	0	1	0	2	0	0	2	0	0	1	0	0	0	0	0	0	0	0	7		704.386		REV__P41155					yes	yes	1	0.010469	114.67	1	3951000	3951000	+
LQPKYLQPLL	YYGFPLQYYPYYGKLLQPKYLQPLLAVQFT	YYGKLLQPKYLQPLLAVQFTNLTVDTEIRV	L	L	Q	L	L	A	0	0	0	0	0	2	0	0	0	0	4	1	0	0	2	0	0	0	1	0	0	0	10		1211.73	P14094	P14094	251	260	Atp1b1	Sodium/potassium-transporting ATPase subunit beta-1	yes	yes	2	5.9139e-05	170.66	1	16886000	16886000
LRFDGAL	LNRLISQIVSSITASLRFDGALNVDLTEFQ	IVSSITASLRFDGALNVDLTEFQTNLVPYP	S	L	R	A	L	N	1	1	0	1	0	0	0	1	0	0	2	0	0	1	0	0	0	0	0	0	0	0	7		790.434	P68373;P68369;P05213;P05214;Q9JJZ2	P68373	242	248	Tuba1c;Tuba1a;Tuba1b;Tuba3a;Tuba8	Tubulin alpha-1C chain;Tubulin alpha-1A chain;Tubulin alpha-1B chain;Tubulin alpha-3 chain;Tubulin alpha-8 chain	no	no	2	0.043553	80.462	1	2594700	2594700
LRFPGQL	LNHLVSATMSGVTTCLRFPGQLNADLRKLA	TMSGVTTCLRFPGQLNADLRKLAVNMVPFP	C	L	R	Q	L	N	0	1	0	0	0	1	0	1	0	0	2	0	0	1	1	0	0	0	0	0	0	0	7		829.481	P68372;P99024;Q7TMM9;Q9CWF2;Q922F4;A2AQ07;Q9D6F9;Q9ERD7	P68372	240	246	Tubb4b;Tubb5;Tubb2a;Tubb2b;Tubb6;Tubb1;Tubb4a;Tubb3	Tubulin beta-4B chain;Tubulin beta-5 chain;Tubulin beta-2A chain;Tubulin beta-2B chain;Tubulin beta-6 chain;Tubulin beta-1 chain;Tubulin beta-4A chain;Tubulin beta-3 chain	no	no	2	0.0045984	143.18	1	6752900	6752900
LRLASPIHPDVVM	LTVFGVILGAVCGGLLRLASPIHPDVVMLI	GLLRLASPIHPDVVMLIAFPGDILMRMLKM	L	L	R	V	M	L	1	1	0	1	0	0	0	0	1	1	2	0	1	0	2	1	0	0	0	2	0	0	13		1446.8	P43006	P43006	64	76	Slc1a2	Excitatory amino acid transporter 2	yes	yes	2	0.001262	123.51	1	4504300	4504300
LRMPPWLNPWL	EMCNALNSVSENQSLLRMPPWLNPWLLGAV	NQSLLRMPPWLNPWLLGAVVMSMALHFLIL	L	L	R	W	L	L	0	1	1	0	0	0	0	0	0	0	3	0	1	0	3	0	0	2	0	0	0	0	11		1421.76	Q64518	Q64518	923	933	Atp2a3	Sarcoplasmic/endoplasmic reticulum calcium ATPase 3	yes	yes	2	0.030735	71.223	1	0	0
LRRPPGREAYPGDVF	DLSKQAVAYRQMSLLLRRPPGREAYPGDVF	LRRPPGREAYPGDVFYLHSRLLERAAKMND	L	L	R	V	F	Y	1	3	0	1	0	0	1	2	0	0	1	0	0	1	3	0	0	0	1	1	0	0	15		1728.91	Q03265	Q03265	328	342	Atp5a1	ATP synthase subunit alpha, mitochondrial	yes	yes	3	0.02106	91.207	1	6343900	6343900
LRVAPEEHPVL	WDDMEKIWHHTFYNELRVAPEEHPVLLTEA	FYNELRVAPEEHPVLLTEAPLNPKANREKM	E	L	R	V	L	L	1	1	0	0	0	0	2	0	1	0	2	0	0	0	2	0	0	0	0	2	0	0	11		1258.7	P63260;P60710	P63260	94	104	Actg1;Actb	Actin, cytoplasmic 2;Actin, cytoplasmic 2, N-terminally processed;Actin, cytoplasmic 1;Actin, cytoplasmic 1, N-terminally processed	yes	no	3	0.0033178	102.53	1	5795400	5795400
LSGLPSGPSVGSGPPPPPPGPPPPPIST	TTGLAWSKTGPVAKELSGLPSGPSVGSGPP	PPPPPPGPPPPPISTSSGSDDSASRSALFA	E	L	S	S	T	S	0	0	0	0	0	0	0	5	0	1	2	0	0	0	13	5	1	0	0	1	0	0	28		2539.33	P40124	P40124	216	243	Cap1	Adenylyl cyclase-associated protein 1	yes	yes	3	0.011435	89.829	1	665280	665280
LSLGGLPPLTGF	WNKTPAMLTMISLMLLSLGGLPPLTGFLPK	LMLLSLGGLPPLTGFLPKWIIITELMKNNC	L	L	S	G	F	L	0	0	0	0	0	0	0	3	0	0	4	0	0	1	2	1	1	0	0	0	0	0	12		1170.66	P03893	P03893	249	260	Mtnd2	NADH-ubiquinone oxidoreductase chain 2	yes	yes	2	0.03435	76.827	1	197290	197290
LSMPPILHF	TGTEAAAATVLQGGFLSMPPILHFNRPFLF	VLQGGFLSMPPILHFNRPFLFIIFEEHSQS	F	L	S	H	F	N	0	0	0	0	0	0	0	0	1	1	2	0	1	1	2	1	0	0	0	0	0	0	9		1053.57	Q00898	Q00898	377	385	Serpina1e	Alpha-1-antitrypsin 1-5	yes	yes	2	0.014504	102.98	1	248050	248050
LSYPLPFF	SIRAVVNLFLVAKALLSYPLPFFAAVEVLE	FLVAKALLSYPLPFFAAVEVLEKSLFQEGS	L	L	S	F	F	A	0	0	0	0	0	0	0	0	0	0	2	0	0	2	2	1	0	0	1	0	0	0	8		982.516	O35633	O35633	392	399	Slc32a1	Vesicular inhibitory amino acid transporter	yes	yes	2	0.0016499	149.11	1	58588	58588
LTASKSAPSIPKENF	SVKVIVVGNPANTNCLTASKSAPSIPKENF	LTASKSAPSIPKENFSCLTRLDHNRAKSQI	C	L	T	N	F	S	2	0	1	0	0	0	1	0	0	1	1	2	0	1	2	3	1	0	0	0	0	0	15		1588.85	P14152	P14152	138	152	Mdh1	Malate dehydrogenase, cytoplasmic	yes	yes	2;3	1.7373e-06	157.2	2	7322200	7322200
LTDPAPATTF	GSITSVQAIYVPADDLTDPAPATTFAHLDA	VPADDLTDPAPATTFAHLDATTVLSRAIAE	D	L	T	T	F	A	2	0	0	1	0	0	0	0	0	0	1	0	0	1	2	0	3	0	0	0	0	0	10		1032.51	P56480	P56480	367	376	Atp5b	ATP synthase subunit beta, mitochondrial	yes	yes	2	0.029377	82.279	1	972870	972870
LTEAPLNPKANREKMTQIM	FYNELRVAPEEHPVLLTEAPLNPKANREKM	PLNPKANREKMTQIMFETFNTPAMYVAIQA	L	L	T	I	M	F	2	1	2	0	0	1	2	0	0	1	2	2	2	0	2	0	2	0	0	0	0	0	19		2184.14	P63260;P60710;P63268;P68134;P68033;P62737	P63260	105	123	Actg1;Actb;Actg2;Acta1;Actc1;Acta2	Actin, cytoplasmic 2;Actin, cytoplasmic 2, N-terminally processed;Actin, cytoplasmic 1;Actin, cytoplasmic 1, N-terminally processed;Actin, gamma-enteric smooth muscle;Actin, alpha skeletal muscle;Actin, alpha cardiac muscle 1;Actin, aortic smooth muscle	yes	no	4	0.019608	88.319	1	4465200	4465200
LTIHFPTDYPFKPPKVAF	IMGPNDSPYQGGVFFLTIHFPTDYPFKPPK	HFPTDYPFKPPKVAFTTRIYHPNINSNGSI	F	L	T	A	F	T	1	0	0	1	0	0	0	0	1	1	1	2	0	3	4	0	2	0	1	1	0	0	18		2117.14	P62838;P61079	P62838	52	69	Ube2d2;Ube2d3	Ubiquitin-conjugating enzyme E2 D2;Ubiquitin-conjugating enzyme E2 D3	yes	no	3;4	2.5054e-07	181.51	2	2674400	2674400
LTWQKIAPLSIL	PEVTQGIPLHMGLILLTWQKIAPLSILIQI	LILLTWQKIAPLSILIQIYPLLNSTIILML	L	L	T	I	L	I	1	0	0	0	0	1	0	0	0	2	3	1	0	0	1	1	1	1	0	0	0	0	12		1381.83	P03893	P03893	131	142	Mtnd2	NADH-ubiquinone oxidoreductase chain 2	yes	yes	2	0.0015313	125.74	1	603640	603640
LVEPKTAWRL	DQLFEMADQYQYQVVLVEPKTAWRLDCAQL	QYQVVLVEPKTAWRLDCAQLKEKNQWQLSA	V	L	V	R	L	D	1	1	0	0	0	0	1	0	0	0	2	1	0	0	1	0	1	1	0	1	0	0	10		1211.7	P16330	P16330	146	155	Cnp	2,3-cyclic-nucleotide 3-phosphodiesterase	yes	yes	3	0.030597	80.763	1	728570	728570
LVFHSFGGGTGSGF	RIRKLADQCTGLQGFLVFHSFGGGTGSGFT	FLVFHSFGGGTGSGFTSLLMERLSVDYGKK	F	L	V	G	F	T	0	0	0	0	0	0	0	5	1	0	1	0	0	3	0	2	1	0	0	1	0	0	14		1368.65	P68373;P68369;P05213	P68373	136	149	Tuba1c;Tuba1a;Tuba1b	Tubulin alpha-1C chain;Tubulin alpha-1A chain;Tubulin alpha-1B chain	no	no	2	7.022e-43	389.53	1	22024000	22024000
LVGGASLKPEF	ATCKELASQPDVDGFLVGGASLKPEFVDII	VDGFLVGGASLKPEFVDIINAKQ_______	F	L	V	E	F	V	1	0	0	0	0	0	1	2	0	0	2	1	0	1	1	1	0	0	0	1	0	0	11		1116.62	P17751	P17751	231	241	Tpi1	Triosephosphate isomerase	yes	yes	2	0.032074	78.932	1	1952000	1952000
LVPFWTF	PNPLFDLAGITCGHFLVPFWTFFGATLIGK	AGITCGHFLVPFWTFFGATLIGKAIIKMHI	F	L	V	T	F	F	0	0	0	0	0	0	0	0	0	0	1	0	0	2	1	0	1	1	0	1	0	0	7		908.48	Q99KU0	Q99KU0	282	288	Vmp1	Vacuole membrane protein 1	yes	yes	2	0.013746	89.775	1	0	0
LVPYPRIHFPLAT	FDGALNVDLTEFQTNLVPYPRIHFPLATYA	TNLVPYPRIHFPLATYAPVISAEKAYHEQL	N	L	V	A	T	Y	1	1	0	0	0	0	0	0	1	1	2	0	0	1	3	0	1	0	1	1	0	0	13		1522.87	P68373;P68369;P05213;P05214	P68373	259	271	Tuba1c;Tuba1a;Tuba1b;Tuba3a	Tubulin alpha-1C chain;Tubulin alpha-1A chain;Tubulin alpha-1B chain;Tubulin alpha-3 chain	no	no	2	0.023688	82.261	1	670320	670320
LVRGQKVLDSGAPIKIPVGPETL	GESTVRTIAMDGTEGLVRGQKVLDSGAPIK	DSGAPIKIPVGPETLGRIMNVIGEPIDERG	G	L	V	T	L	G	1	1	0	1	0	1	1	3	0	2	3	2	0	0	3	1	1	0	0	3	0	0	23		2386.39	P56480	P56480	119	141	Atp5b	ATP synthase subunit beta, mitochondrial	yes	yes	3;4	2.5683e-12	214.49	2	11356000	11356000
LVVGSPGPVPHLEL	VASTELDEVESRAQLLVVGSPGPVPHLELS	LLVVGSPGPVPHLELSDRHLLKQSQVHLSW	L	L	V	E	L	S	0	0	0	0	0	0	1	2	1	0	3	0	0	0	3	1	0	0	0	3	0	0	14		1412.8	P11627	P11627	606	619	L1cam	Neural cell adhesion molecule L1	yes	yes	2	9.6486e-07	177.7	1	554210	554210
LWKNFLPLTL	RASYPRFRYDQLMHLLWKNFLPLTLALCMW	QLMHLLWKNFLPLTLALCMWHISLPIFTAG	L	L	W	T	L	A	0	0	1	0	0	0	0	0	0	0	4	1	0	1	1	0	1	1	0	0	0	0	10		1243.73	P03888	P03888	289	298	Mtnd1	NADH-ubiquinone oxidoreductase chain 1	yes	yes	2	0.010626	105.57	1	182460	182460
LYYAPFDGIL	TNQIFGLSETEPGSFLYYAPFDGILGLAYP	EPGSFLYYAPFDGILGLAYPSISASGATPV	F	L	Y	I	L	G	1	0	0	1	0	0	0	1	0	1	2	0	0	1	1	0	0	0	2	0	0	0	10		1170.6	P00791	P00791	171	180			yes	yes	2	8.0028e-05	162.07	1	1142900	1142900
LYYAPFDGILG	TNQIFGLSETEPGSFLYYAPFDGILGLAYP	PGSFLYYAPFDGILGLAYPSISASGATPVF	F	L	Y	L	G	L	1	0	0	1	0	0	0	2	0	1	2	0	0	1	1	0	0	0	2	0	0	0	11		1227.62	P00791	P00791	171	181			yes	yes	2	1.2895e-08	211.1	1	1965900	1965900
LYYAPFDGILGL	TNQIFGLSETEPGSFLYYAPFDGILGLAYP	GSFLYYAPFDGILGLAYPSISASGATPVFD	F	L	Y	G	L	A	1	0	0	1	0	0	0	2	0	1	3	0	0	1	1	0	0	0	2	0	0	0	12		1340.7	P00791	P00791	171	182			yes	yes	2	0.0079343	107.66	1	80384	80384
LYYAPFDGILGLAY	TNQIFGLSETEPGSFLYYAPFDGILGLAYP	FLYYAPFDGILGLAYPSISASGATPVFDNL	F	L	Y	A	Y	P	2	0	0	1	0	0	0	2	0	1	3	0	0	1	1	0	0	0	3	0	0	0	14		1574.8	P00791	P00791	171	184			yes	yes	2	0.025831	110.87	1	219860	219860
MARDWPDARGIWHNDNKTFL	FLFDKPVSPLLLASGMARDWPDARGIWHND	PDARGIWHNDNKTFLVWINEEDHLRVISMQ	G	M	A	F	L	V	2	2	2	3	0	0	0	1	1	1	1	1	1	1	1	0	1	2	0	0	0	0	20		2442.17	Q04447	Q04447	207	226	Ckb	Creatine kinase B-type	yes	yes	4	0.0064019	105.67	1	3114900	3114900
MARKMKDTDSEE	ADGNGTIDFPEFLTMMARKMKDTDSEEEIR	LTMMARKMKDTDSEEEIREAFRVFDKDGNG	M	M	A	E	E	E	1	1	0	2	0	0	2	0	0	0	0	2	2	0	0	1	1	0	0	0	0	0	12		1439.64	P0DP28;P0DP27;P0DP26	P0DP28	73	84			yes	no	2	0.019046	94.692	1	356230	356230
MDMSPLRPQNYL	______________________________	SMDMDMSPLRPQNYLFGCELKADKDYHFKV	D	M	D	Y	L	F	0	1	1	1	0	1	0	0	0	0	2	0	2	0	2	1	0	0	1	0	0	0	12		1463.69	Q61937	Q61937	7	18	Npm1	Nucleophosmin	yes	yes	2	2.9254e-05	148.32	1	610120	610120
MDVPTSSGELWILGDVFIRQYYTVFDRANNKVGLAPVA	YILQDDDSCTSGFEGMDVPTSSGELWILGD	VFDRANNKVGLAPVA_______________	G	M	D	V	A	-	3	2	2	3	0	1	1	3	0	2	3	1	1	2	2	2	2	1	2	5	0	0	38		4241.16	P00791	P00791	348	385			yes	yes	4	0.009629	95.099	1	743940	743940
MGRGAPLRLGF	PDLLEESSSLLEPNEMGRGAPLRLGFVAGV	EPNEMGRGAPLRLGFVAGVINRERIPTFER	E	M	G	G	F	V	1	2	0	0	0	0	0	3	0	0	2	0	1	1	1	0	0	0	0	0	0	0	11		1173.64	Q9Z1G4	Q9Z1G4	167	177	Atp6v0a1	V-type proton ATPase 116 kDa subunit a isoform 1	yes	yes	3	0.032303	78.655	1	966100	966100
MGTDGHPFGWPSNGFPGPQGPY	SNQHPWFGMEQEYTLMGTDGHPFGWPSNGF	FGWPSNGFPGPQGPYYCGVGADKAYGRDIV	L	M	G	P	Y	Y	0	0	1	1	0	1	0	6	1	0	0	0	1	2	5	1	1	1	1	0	0	0	22		2301.99	P15105	P15105	140	161	Glul	Glutamine synthetase	yes	yes	2	4.0804e-26	280.87	1	381860	381860
MGTDGHPFGWPSNGFPGPQGPYY	SNQHPWFGMEQEYTLMGTDGHPFGWPSNGF	GWPSNGFPGPQGPYYCGVGADKAYGRDIVE	L	M	G	Y	Y	C	0	0	1	1	0	1	0	6	1	0	0	0	1	2	5	1	1	1	2	0	0	0	23		2465.05	P15105	P15105	140	162	Glul	Glutamine synthetase	yes	yes	2;3	2.9478e-13	296.14	2	1717600	1717600
MGTDGHPFGWPSNGFPGPQGPYYCG	SNQHPWFGMEQEYTLMGTDGHPFGWPSNGF	PSNGFPGPQGPYYCGVGADKAYGRDIVEAH	L	M	G	C	G	V	0	0	1	1	1	1	0	7	1	0	0	0	1	2	5	1	1	1	2	0	0	0	25		2625.08	P15105	P15105	140	164	Glul	Glutamine synthetase	yes	yes	2;3	2.5574e-13	289.18	2	2735800	2735800
MIKGLYGINE	ESIMKNLRRVHPISTMIKGLYGINEDVFLS	HPISTMIKGLYGINEDVFLSVPCILGQNGI	T	M	I	N	E	D	0	0	1	0	0	0	1	2	0	2	1	1	1	0	0	0	0	0	1	0	0	0	10		1136.59	P06151	P06151	276	285	Ldha	L-lactate dehydrogenase A chain	yes	yes	2	0.029606	82.645	1	463840	463840
MILPVGA	NGGSHAGNKLAMQEFMILPVGASSFREAMR	NKLAMQEFMILPVGASSFREAMRIGAEVYH	F	M	I	G	A	S	1	0	0	0	0	0	0	1	0	1	1	0	1	0	1	0	0	0	0	1	0	0	7		699.399	P17182;P21550;P17183	P17182	169	175	Eno1;Eno3;Eno2	Alpha-enolase;Beta-enolase;Gamma-enolase	no	no	1	0.042676	81.364	1	1525900	1525900
MLEPSANMPWF	DTVAFVPISGWNGDNMLEPSANMPWFKGWK	NGDNMLEPSANMPWFKGWKVTRKDGSASGT	N	M	L	W	F	K	1	0	1	0	0	0	1	0	0	0	1	0	2	1	2	1	0	1	0	0	0	0	11		1321.58	P10126	P10126	201	211	Eef1a1	Elongation factor 1-alpha 1	yes	yes	2	0.028785	81.594	1	293690	293690
MLEPSANMPWFKG	DTVAFVPISGWNGDNMLEPSANMPWFKGWK	DNMLEPSANMPWFKGWKVTRKDGSASGTTL	N	M	L	K	G	W	1	0	1	0	0	0	1	1	0	0	1	1	2	1	2	1	0	1	0	0	0	0	13		1506.7	P10126	P10126	201	213	Eef1a1	Elongation factor 1-alpha 1	yes	yes	2	4.475e-06	173.28	1	1858200	1858200
MLEPSPNMPWFKG	ATVPFVPISGWHGDNMLEPSPNMPWFKGWK	DNMLEPSPNMPWFKGWKVERKEGNASGVSL	N	M	L	K	G	W	0	0	1	0	0	0	1	1	0	0	1	1	2	1	3	1	0	1	0	0	0	0	13		1532.72	P62631	P62631	201	213	Eef1a2	Elongation factor 1-alpha 2	yes	yes	2	5.6212e-09	197.21	1	2503000	2503000
MREEGASPLDFD	LQMDPEYRVRKFLALMREEGASPLDFD___	LALMREEGASPLDFD_______________	L	M	R	F	D	-	1	1	0	2	0	0	2	1	0	0	1	0	1	1	1	1	0	0	0	0	0	0	12		1365.59	P46460	P46460	733	744	Nsf	Vesicle-fusing ATPase	yes	yes	2	0.0090179	106.4	1	804600	804600
MSHLGRPDGVPMPDKY	SIKFCLDNGAKSVVLMSHLGRPDGVPMPDK	SHLGRPDGVPMPDKYSLEPVAAELKSLLGK	L	M	S	K	Y	S	0	1	0	2	0	0	0	2	1	0	1	1	2	0	3	1	0	0	1	1	0	0	16		1798.85	P09411	P09411	61	76	Pgk1	Phosphoglycerate kinase 1	yes	yes	3	0.040532	69.605	1	1481300	1481300
MSLPQGEKVQAM	TSASSHLNKGIKQMYMSLPQGEKVQAMYIW	QMYMSLPQGEKVQAMYIWVDGTGEGLRCKT	Y	M	S	A	M	Y	1	0	0	0	0	2	1	1	0	0	1	1	2	0	1	1	0	0	0	1	0	0	12		1317.64	P15105	P15105	18	29	Glul	Glutamine synthetase	yes	yes	2	0.00034761	148.28	1	5363300	5363300
MVSNQHPWFG	PAETNLRHICKRIMDMVSNQHPWFGMEQEY	KRIMDMVSNQHPWFGMEQEYTLMGTDGHPF	D	M	V	F	G	M	0	0	1	0	0	1	0	1	1	0	0	0	1	1	1	1	0	1	0	1	0	0	10		1201.53	P15105	P15105	123	132	Glul	Glutamine synthetase	yes	yes	2	0.0031931	117.81	1	3241500	3241500
MVVGESGLGKSTL	QVHRKSVKKGFEFTLMVVGESGLGKSTLIN	TLMVVGESGLGKSTLINSLFLTDLYPERII	L	M	V	T	L	I	0	0	0	0	0	0	1	3	0	0	2	1	1	0	0	2	1	0	0	2	0	0	13		1276.67	P42208;O55131	P42208	41	53	Sept2;Sept7	Septin-2;Septin-7	yes	no	2	0.0012948	122.7	1	760330	760330
MWNPHLGY	LTQIETLFKSKNYEFMWNPHLGYILTCPSN	KSKNYEFMWNPHLGYILTCPSNLGTGLRAG	F	M	W	G	Y	I	0	0	1	0	0	0	0	1	1	0	1	0	1	0	1	0	0	1	1	0	0	0	8		1016.45	Q04447	Q04447	272	279	Ckb	Creatine kinase B-type	yes	yes	2	0.0016499	149.11	1	7935800	7935800
MWNPHLGYIL	LTQIETLFKSKNYEFMWNPHLGYILTCPSN	KNYEFMWNPHLGYILTCPSNLGTGLRAGVH	F	M	W	I	L	T	0	0	1	0	0	0	0	1	1	1	2	0	1	0	1	0	0	1	1	0	0	0	10		1242.62	Q04447	Q04447	272	281	Ckb	Creatine kinase B-type	yes	yes	2	0.012919	102.72	1	1581900	1581900
NAINKCPLL	FLSGGQSEEEASINLNAINKCPLLKPWALT	EASINLNAINKCPLLKPWALTFSYGRALQA	L	N	A	L	L	K	1	0	2	0	1	0	0	0	0	1	2	1	0	0	1	0	0	0	0	0	0	0	9		984.543	P05064	P05064	285	293	Aldoa	Fructose-bisphosphate aldolase A	yes	yes	2	0.00045063	154.35	1	4652600	4652600
NAINRCPLPRPWALT	FLSGGQSEEEASLNLNAINRCPLPRPWALT	NAINRCPLPRPWALTFSYGRALQASALNAW	L	N	A	L	T	F	2	2	2	0	1	0	0	0	0	1	2	0	0	0	3	0	1	1	0	0	0	0	15		1720.92	P05063	P05063	285	299	Aldoc	Fructose-bisphosphate aldolase C	yes	yes	2;3	1.5184e-06	161.93	2	8556000	8556000
NCSPHPYWLPNF	AVLKYENNVMNIRQFNCSPHPYWLPNFMDV	RQFNCSPHPYWLPNFMDVFTWSLPFVGEKV	F	N	C	N	F	M	0	0	2	0	1	0	0	0	1	0	1	0	0	1	3	1	0	1	1	0	0	0	12		1473.65	P63328;P48455;P48453	P48453	344	355	Ppp3ca;Ppp3cc;Ppp3cb	Serine/threonine-protein phosphatase 2B catalytic subunit alpha isoform;Serine/threonine-protein phosphatase 2B catalytic subunit gamma isoform;Serine/threonine-protein phosphatase 2B catalytic subunit beta isoform	no	no	2	0.0018576	119.53	1	487750	487750
NELKPHINGPFTPDL	PDPGCQYDQVIEINLNELKPHINGPFTPDL	NELKPHINGPFTPDLAHPVADVGTVAEKEG	L	N	E	D	L	A	0	0	2	1	0	0	1	1	1	1	2	1	0	1	3	0	1	0	0	0	0	0	15		1690.87	Q99KI0	Q99KI0	343	357	Aco2	Aconitate hydratase, mitochondrial	yes	yes	2	0.022495	107.18	1	1227600	1227600
NELKPHINGPFTPDLAHPVAD	PDPGCQYDQVIEINLNELKPHINGPFTPDL	INGPFTPDLAHPVADVGTVAEKEGWPLDIR	L	N	E	A	D	V	2	0	2	2	0	0	1	1	2	1	2	1	0	1	4	0	1	0	0	1	0	0	21		2281.15	Q99KI0	Q99KI0	343	363	Aco2	Aconitate hydratase, mitochondrial	yes	yes	3;4	2.7385e-12	223.51	2	3921900	3921900
NIIPASTGAAKAVG	GPSGKLWRDGRGAAQNIIPASTGAAKAVGK	QNIIPASTGAAKAVGKVIPELNGKLTGMAF	Q	N	I	V	G	K	4	0	1	0	0	0	0	2	0	2	0	1	0	0	1	1	1	0	0	1	0	0	14		1268.71	P16858	P16858	203	216	Gapdh	Glyceraldehyde-3-phosphate dehydrogenase	yes	yes	2	0.029012	83.455	1	12302000	12302000
NIIPASTGAAKAVGKVIPEL	GPSGKLWRDGRGAAQNIIPASTGAAKAVGK	STGAAKAVGKVIPELNGKLTGMAFRVPTPN	Q	N	I	E	L	N	4	0	1	0	0	0	1	2	0	3	1	2	0	0	2	1	1	0	0	2	0	0	20		1948.14	P16858	P16858	203	222	Gapdh	Glyceraldehyde-3-phosphate dehydrogenase	yes	yes	2	0.017794	112.34	1	563620	563620
NIIPYITNV	VNRKGQVLSVCVEEENIIPYITNVLQNPDL	VCVEEENIIPYITNVLQNPDLALRMAVRNN	E	N	I	N	V	L	0	0	2	0	0	0	0	0	0	3	0	0	0	0	1	0	1	0	1	1	0	0	9		1045.58	Q68FD5	Q68FD5	333	341	Cltc	Clathrin heavy chain 1	yes	yes	2	0.0031829	131.41	1	433990	433990
NKAETAAKHGEAQVKIWRRSYDVPPPPMEPDHPF	TWRLNERHYGGLTGLNKAETAAKHGEAQVK	SYDVPPPPMEPDHPFYSNISKDRRYADLTE	L	N	K	P	F	Y	4	2	1	2	0	1	3	1	2	1	0	3	1	1	6	1	1	1	1	2	0	0	34		3897.94	Q9DBJ1	Q9DBJ1	99	132	Pgam1	Phosphoglycerate mutase 1	yes	yes	5	2.8158e-06	152.49	1	1867800	1867800
NKEEAPPMNPLNPLNPLSPLNPLNAHPSL	SQLRRHMQMSSQEALNKEEAPPMNPLNPLN	NPLSPLNPLNAHPSLYRRPRPIEGLALGLG	L	N	K	S	L	Y	2	0	6	0	0	0	2	0	1	0	6	1	1	0	8	2	0	0	0	0	0	0	29		3127.61	Q61290	Q61290	799	827	Cacna1e	Voltage-dependent R-type calcium channel subunit alpha-1E	yes	yes	3	0.0056153	102.57	1	93609	93609
NLTLDGWPLD				N	L	L	D		0	0	1	2	0	0	0	1	0	0	3	0	0	0	1	0	1	1	0	0	0	0	10		1142.56		REV__Q3MI48					yes	yes	2	0.026609	85.716	1	3573600	3573600	+
NLVPYPRIHFPLAT	RFDGALNVDLTEFQTNLVPYPRIHFPLATY	TNLVPYPRIHFPLATYAPVISAEKAYHEQL	T	N	L	A	T	Y	1	1	1	0	0	0	0	0	1	1	2	0	0	1	3	0	1	0	1	1	0	0	14		1636.91	P68373;P68369;P05213;P05214	P68373	258	271	Tuba1c;Tuba1a;Tuba1b;Tuba3a	Tubulin alpha-1C chain;Tubulin alpha-1A chain;Tubulin alpha-1B chain;Tubulin alpha-3 chain	no	no	2;3	0.023625	106.4	2	1992800	1992800
NMVPFPRLHF	RFPGQLNADLRKLAVNMVPFPRLHFFMPGF	RKLAVNMVPFPRLHFFMPGFAPLTSRGSQQ	V	N	M	H	F	F	0	1	1	0	0	0	0	0	1	0	1	0	1	2	2	0	0	0	0	1	0	0	10		1256.65	P68372;P99024;Q7TMM9;Q9CWF2;Q922F4;A2AQ07;Q9D6F9;Q9ERD7	P68372	256	265	Tubb4b;Tubb5;Tubb2a;Tubb2b;Tubb6;Tubb1;Tubb4a;Tubb3	Tubulin beta-4B chain;Tubulin beta-5 chain;Tubulin beta-2A chain;Tubulin beta-2B chain;Tubulin beta-6 chain;Tubulin beta-1 chain;Tubulin beta-4A chain;Tubulin beta-3 chain	no	no	3	0.016692	98.033	1	4324200	4324200
NTWLGDPSKNLL	FHKEEFRPSAPYRIFNTWLGDPSKNLLLAE	RIFNTWLGDPSKNLLLAEVINIIKREDLLN	F	N	T	L	L	L	0	0	2	1	0	0	0	1	0	0	3	1	0	0	1	1	1	1	0	0	0	0	12		1356.7	P61922	P61922	380	391	Abat	4-aminobutyrate aminotransferase, mitochondrial	yes	yes	2	0.02633	86.189	1	1578300	1578300
NVKAKIQDKEGIPPDQQRLIF	GKTITLEVEPSDTIENVKAKIQDKEGIPPD	QDKEGIPPDQQRLIFAGKQLEDGRTLSDYN	E	N	V	I	F	A	1	1	1	2	0	3	1	1	0	3	1	3	0	1	2	0	0	0	0	1	0	0	21		2436.35	P62984;P62983;P0CG49;P0CG50	P62984	25	45	Uba52;Rps27a;Ubb;Ubc	Ubiquitin-60S ribosomal protein L40;Ubiquitin;60S ribosomal protein L40;Ubiquitin-40S ribosomal protein S27a;Ubiquitin;40S ribosomal protein S27a;Polyubiquitin-B;Ubiquitin;Polyubiquitin-C;Ubiquitin;Ubiquitin-related 1;Ubiquitin-related 2	yes	no	4	0.04265	70.917	1	1264100	1264100
NVKFYPPDPAQL	EIKKQVRGVPWNFTFNVKFYPPDPAQLTED	FTFNVKFYPPDPAQLTEDITRYYLCLQLRQ	F	N	V	Q	L	T	1	0	1	1	0	1	0	0	0	0	1	1	0	1	3	0	0	0	1	1	0	0	12		1387.71	P48193;Q9WV92	P48193	286	297	Epb41;Epb41l3	Protein 4.1;Band 4.1-like protein 3;Band 4.1-like protein 3, N-terminally processed	yes	no	2	0.022479	90.685	1	1138400	1138400
NVKGYLGPEQLPDCL	TPGVAADLSHIETRANVKGYLGPEQLPDCL	NVKGYLGPEQLPDCLKGCDVVVIPAGVPRK	A	N	V	C	L	K	0	0	1	1	1	1	1	2	0	0	3	1	0	0	2	0	0	0	1	1	0	0	15		1644.82	P08249	P08249	76	90	Mdh2	Malate dehydrogenase, mitochondrial	yes	yes	2	1.015e-11	230.59	1	2611700	2611700
NVLPIPFPTF	ILAGVTILLNLGDCTNVLPIPFPTFLSGLA	LGDCTNVLPIPFPTFLSGLALLSVLFYATA	T	N	V	T	F	L	0	0	1	0	0	0	0	0	0	1	1	0	0	2	3	0	1	0	0	1	0	0	10		1143.63	O35682	O35682	224	233	Myadm	Myeloid-associated differentiation marker	yes	yes	2	0.0024479	126.67	1	29854	29854
NVQNKNSSY	FRGRMSMKEVDEQMLNVQNKNSSYFVEWIP	VDEQMLNVQNKNSSYFVEWIPNNVKTAVCD	L	N	V	S	Y	F	0	0	3	0	0	1	0	0	0	0	0	1	0	0	0	2	0	0	1	1	0	0	9		1052.49	P68372;P99024;Q7TMM9;Q9CWF2	P68372	332	340	Tubb4b;Tubb5;Tubb2a;Tubb2b	Tubulin beta-4B chain;Tubulin beta-5 chain;Tubulin beta-2A chain;Tubulin beta-2B chain	no	no	2	0.027601	86.833	1	193510	193510
NWVPVSVEGY	VLLGGIDSSYYTGSLNWVPVSVEGYWQITL	YTGSLNWVPVSVEGYWQITLDSITMDGETI	L	N	W	G	Y	W	0	0	1	0	0	0	1	1	0	0	0	0	0	0	1	1	0	1	1	3	0	0	10		1148.55	P00791	P00791	239	248			yes	yes	2	6.9218e-05	166.52	1	4698300	4698300
PAEYPFKPPKITF	NPPYDKGAFRIEINFPAEYPFKPPKITFKT	NFPAEYPFKPPKITFKTKIYHPNIDEKGQV	F	P	A	T	F	K	1	0	0	0	0	0	1	0	0	1	0	2	0	2	4	0	1	0	1	0	0	0	13		1533.82	P68037	P68037	58	70	Ube2l3	Ubiquitin-conjugating enzyme E2 L3	yes	yes	3	0.001282	123.02	1	1556200	1556200
PALDMGGTSDPYVKV	QNNQLLVGIIQAAELPALDMGGTSDPYVKV	PALDMGGTSDPYVKVFLLPDKKKKFETKVH	L	P	A	K	V	F	1	0	0	2	0	0	0	2	0	0	1	1	1	0	2	1	1	0	1	2	0	0	15		1548.75	P46096;P46097	P46096	169	183	Syt1;Syt2	Synaptotagmin-1;Synaptotagmin-2	yes	no	2	3.8488e-11	218.62	1	1293800	1293800
PARVNVPVIGGHAGKTIIPLIS	IVRANTFVAELKGLDPARVNVPVIGGHAGK	VIGGHAGKTIIPLISQCTPKVDFPQDQLAT	D	P	A	I	S	Q	2	1	1	0	0	0	0	3	1	4	1	1	0	0	3	1	1	0	0	3	0	0	22		2208.31	P08249	P08249	189	210	Mdh2	Malate dehydrogenase, mitochondrial	yes	yes	3;4	0.010244	97.488	2	2092300	2092300
PARVNVPVIGGHAGKTIIPLISQ	IVRANTFVAELKGLDPARVNVPVIGGHAGK	IGGHAGKTIIPLISQCTPKVDFPQDQLATL	D	P	A	S	Q	C	2	1	1	0	0	1	0	3	1	4	1	1	0	0	3	1	1	0	0	3	0	0	23		2336.37	P08249	P08249	189	211	Mdh2	Malate dehydrogenase, mitochondrial	yes	yes	4	0.02605	81.922	1	1567400	1567400
PCPPVGCGKTSGGGGGGGGGGGGGYYSGGGSGCGGGSSGGGSSCGGGGGGSYGGGSSCGGGGGSGGGV	______________________________	GGSSCGGGGGSGGGVKYSGGGGGSSCGGGY	T	P	C	G	V	K	0	0	0	0	5	0	0	42	0	0	0	1	0	0	3	11	1	0	3	2	0	0	68		5092.94	P18165	P18165	10	77	Lor	Loricrin	yes	yes	3	0.024257	1.1008e-10	1	0	0
PDLSSHNNHMAKVLTPEL	SHNTQKLRFPAEDEFPDLSSHNNHMAKVLT	SSHNNHMAKVLTPELYAELRAKCTPSGFTL	F	P	D	E	L	Y	1	0	2	1	0	0	1	0	2	0	3	1	1	0	2	2	1	0	0	1	0	0	18		2001.99	Q04447	Q04447	21	38	Ckb	Creatine kinase B-type	yes	yes	3	0.00059887	115.42	1	2519300	2519300
PEILPDGDHDLKRCQY	YASICQQNGIVPIVEPEILPDGDHDLKRCQ	EILPDGDHDLKRCQYVTEKVLAAVYKALSD	E	P	E	Q	Y	V	0	1	0	3	1	1	1	1	1	1	2	1	0	0	2	0	0	0	1	0	0	0	16		1897.9	P05064;P05063	P05064	189	204	Aldoa;Aldoc	Fructose-bisphosphate aldolase A;Fructose-bisphosphate aldolase C	no	no	2;3;4	5.14e-07	228.61	3	32458000	32458000
PEVNRVLDKMKSF	NRSNTPIKVDGKDVMPEVNRVLDKMKSFCQ	VMPEVNRVLDKMKSFCQRVRSGDWKGYTGK	M	P	E	S	F	C	0	1	1	1	0	0	1	0	0	0	1	2	1	1	1	1	0	0	0	2	0	0	13		1561.83	P06745	P06745	120	132	Gpi	Glucose-6-phosphate isomerase	yes	yes	4	0.0073246	107.99	1	552450	552450
PEYGGTKVVL	EIEPVSVKVGDKVLLPEYGGTKVVLDDKDY	DKVLLPEYGGTKVVLDDKDYFLFRDSDILG	L	P	E	V	L	D	0	0	0	0	0	0	1	2	0	0	1	1	0	0	1	0	1	0	1	2	0	0	10		1061.58	Q64433	Q64433	74	83	Hspe1	10 kDa heat shock protein, mitochondrial	yes	yes	2	0.0404	72.643	1	3161600	3161600
PFIPLQVPDAPEKL	GQAVDSGIPLLSVSDPFIPLQVPDAPEKLI	DPFIPLQVPDAPEKLIEGLKSPDTSLLLPD	D	P	F	K	L	I	1	0	0	1	0	1	1	0	0	1	2	1	0	1	4	0	0	0	0	1	0	0	14		1562.87	Q3UHJ0	Q3UHJ0	776	789	Aak1	AP2-associated protein kinase 1	yes	yes	2	0.016045	97.911	1	226970	226970
PFPRLHF	GQLNADLRKLAVNMVPFPRLHFFMPGFAPL	RKLAVNMVPFPRLHFFMPGFAPLTSRGSQQ	V	P	F	H	F	F	0	1	0	0	0	0	0	0	1	0	1	0	0	2	2	0	0	0	0	0	0	0	7		912.497	P68372;P99024;Q7TMM9;Q9CWF2;Q922F4;A2AQ07;Q9D6F9;Q9ERD7	P68372	259	265	Tubb4b;Tubb5;Tubb2a;Tubb2b;Tubb6;Tubb1;Tubb4a;Tubb3	Tubulin beta-4B chain;Tubulin beta-5 chain;Tubulin beta-2A chain;Tubulin beta-2B chain;Tubulin beta-6 chain;Tubulin beta-1 chain;Tubulin beta-4A chain;Tubulin beta-3 chain	no	no	2	0.026853	97.64	1	26062000	26062000
PFRLGLGGPIGSGRQFF	VVLGRGGGAISHMLLPFRLGLGGPIGSGRQ	RLGLGGPIGSGRQFFPWIHIGDLAGILNYA	L	P	F	F	F	P	0	2	0	0	0	1	0	5	0	1	2	0	0	3	2	1	0	0	0	0	0	0	17		1804.97	Q5M8N4	Q5M8N4	174	190	Sdr39u1	Epimerase family protein SDR39U1	yes	yes	3	0.026049	82.663	1	254300	254300
PGLPFHPNGKIVPNF	AEETGRVCPLPTTEDPGLPFHPNGKIVPNF	PGLPFHPNGKIVPNFIKRIQTKIKDLLQQM	D	P	G	N	F	I	0	0	2	0	0	0	0	2	1	1	1	1	0	2	4	0	0	0	0	1	0	0	15		1632.88	Q9JJK2	Q9JJK2	59	73	Lancl2	LanC-like protein 2	yes	yes	3	0.00098046	117.07	1	1221900	1221900
PHPYPALTPEQKKELSD	______________________________	PYPALTPEQKKELSDIAHRIVAPGKGILAA	M	P	H	S	D	I	1	0	0	1	0	1	2	0	1	0	2	2	0	0	4	1	1	0	1	0	0	0	17		1948.99	P05064	P05064	2	18	Aldoa	Fructose-bisphosphate aldolase A	yes	yes	4	0.029019	78.932	1	6148000	6148000
PIIPVPLKGQDPLVPAPTKDQGPTAPDPLKTQGPKGTQL	KNQSPVVLGPIKNQDPIIPVPLKGQDPLVP	APDPLKTQGPKGTQLPTVSPSPPVMIPTVP	D	P	I	Q	L	P	2	0	0	3	0	4	0	4	0	2	4	4	0	0	10	0	4	0	0	2	0	0	39		4009.23	Q7TSJ2	Q7TSJ2	844	882	Map6	Microtubule-associated protein 6	yes	yes	5	2.6989e-05	124.29	1	1497200	1497200
PIKIPVGPETL	TEGLVRGQKVLDSGAPIKIPVGPETLGRIM	DSGAPIKIPVGPETLGRIMNVIGEPIDERG	A	P	I	T	L	G	0	0	0	0	0	0	1	1	0	2	1	1	0	0	3	0	1	0	0	1	0	0	11		1162.7	P56480	P56480	131	141	Atp5b	ATP synthase subunit beta, mitochondrial	yes	yes	2	0.0011104	138.08	1	9411500	9411500
PIKVGDAIPSVE	CGGARSFSSSAVTMAPIKVGDAIPSVEVFE	TMAPIKVGDAIPSVEVFEGEPGKKVNLAEL	A	P	I	V	E	V	1	0	0	1	0	0	1	1	0	2	0	1	0	0	2	1	0	0	0	2	0	0	12		1223.68	P99029	P99029	51	62	Prdx5	Peroxiredoxin-5, mitochondrial	yes	yes	2	0.013317	101.38	1	3076700	3076700
PISPGPLTPMRE	EMPTESKKDEWGLAAPISPGPLTPMREKDV	LAAPISPGPLTPMREKDVLEDIPRWEGKQF	A	P	I	R	E	K	0	1	0	0	0	0	1	1	0	1	1	0	1	0	4	1	1	0	0	0	0	0	12		1293.68	P20357	P20357	281	292	Map2	Microtubule-associated protein 2	yes	yes	2	0.026198	81.865	1	1058100	1058100
PKVPNLPVNIPLGIPQM	LTSNLPNVNLPNVNLPKVPNLPVNIPLGIP	VPNLPVNIPLGIPQMPTFSAPSWMAAIYDA	L	P	K	Q	M	P	0	0	2	0	0	1	0	1	0	2	2	1	1	0	5	0	0	0	0	2	0	0	17		1826.05	Q80TJ1	Q80TJ1	1028	1044	Cadps	Calcium-dependent secretion activator 1	yes	yes	2	7.4659e-07	167.6	1	312480	312480
PLAKVIHDNF	LKIVSNASCTTNCLAPLAKVIHDNFGIVEG	TNCLAPLAKVIHDNFGIVEGLMTTVHAITA	A	P	L	N	F	G	1	0	1	1	0	0	0	0	1	1	1	1	0	1	1	0	0	0	0	1	0	0	10		1152.63	P16858	P16858	157	166	Gapdh	Glyceraldehyde-3-phosphate dehydrogenase	yes	yes	2	0.031914	79.128	1	3269400	3269400
PLAPAYAVPKVL	RIAAFADAAVDPIDFPLAPAYAVPKVLKYA	IDFPLAPAYAVPKVLKYAGLKKEDIAMWEV	F	P	L	V	L	K	3	0	0	0	0	0	0	0	0	0	2	1	0	0	3	0	0	0	1	2	0	0	12		1237.74	Q8QZT1	Q8QZT1	323	334	Acat1	Acetyl-CoA acetyltransferase, mitochondrial	yes	yes	2	0.0017006	122.52	1	2612400	2612400
PLIDQTFYPNHKEML	AQMVRLHKKLGTEEFPLIDQTFYPNHKEML	PLIDQTFYPNHKEMLSSTTYPVVVKMGHAH	F	P	L	M	L	S	0	0	1	1	0	1	1	0	1	1	2	1	1	1	2	0	1	0	1	0	0	0	15		1844.91	O88935	O88935	245	259	Syn1	Synapsin-1	yes	yes	3	0.024351	81.526	1	1975800	1975800
PQLPTPPKIKFPNF	YQFSQYVCQQTGLEMPQLPTPPKIKFPNFR	MPQLPTPPKIKFPNFRDSWNSGIISVMSAL	M	P	Q	N	F	R	0	0	1	0	0	1	0	0	0	1	1	2	0	2	5	0	1	0	0	0	0	0	14		1622.92	Q8R404	Q8R404	68	81	Qil1	Protein QIL1	yes	yes	3	0.00055426	136.3	1	3016200	3016200
PSFTPPAVPPRAPISL	TIPPRQEPEPGPNVEPSFTPPAVPPRAPIS	SFTPPAVPPRAPISLSQDPSPPLNGSTTSC	E	P	S	S	L	S	2	1	0	0	0	0	0	0	0	1	1	0	0	1	6	2	1	0	0	1	0	0	16		1645.92	Q9QYR6	Q9QYR6	2028	2043	Map1a	Microtubule-associated protein 1A;MAP1A heavy chain;MAP1 light chain LC2	yes	yes	2	0.00013447	148.62	1	793340	793340
PSISASGATPVF	FLYYAPFDGILGLAYPSISASGATPVFDNL	LAYPSISASGATPVFDNLWDQGLVSQDLFS	Y	P	S	V	F	D	2	0	0	0	0	0	0	1	0	1	0	0	0	1	2	3	1	0	0	1	0	0	12		1132.58	P00791	P00791	185	196			yes	yes	2	3.6808e-13	255.54	1	5943300	5943300
PSISASGATPVFDNL	FLYYAPFDGILGLAYPSISASGATPVFDNL	PSISASGATPVFDNLWDQGLVSQDLFSVYL	Y	P	S	N	L	W	2	0	1	1	0	0	0	1	0	1	1	0	0	1	2	3	1	0	0	1	0	0	15		1474.73	P00791	P00791	185	199			yes	yes	2	1.6093e-23	283.24	1	2303600	2303600
PTTKTYFPHF	AEYGAEALERMFASFPTTKTYFPHFDVSHG	MFASFPTTKTYFPHFDVSHGSAQVKGHGKK	F	P	T	H	F	D	0	0	0	0	0	0	0	0	1	0	0	1	0	2	2	0	3	0	1	0	0	0	10		1237.61	P01942	P01942	38	47	Hba	Hemoglobin subunit alpha	yes	yes	2;3	3.8277e-07	207.29	2	38514000	38514000
PTYGDLNHLVS	EALYDICFRTLKLTTPTYGDLNHLVSATMS	KLTTPTYGDLNHLVSATMSGVTTCLRFPGQ	T	P	T	V	S	A	0	0	1	1	0	0	0	1	1	0	2	0	0	0	1	1	1	0	1	1	0	0	11		1214.59	P68372;P99024;Q7TMM9;Q9CWF2;Q922F4;A2AQ07;Q9D6F9;Q9ERD7	P68372	220	230	Tubb4b;Tubb5;Tubb2a;Tubb2b;Tubb6;Tubb1;Tubb4a;Tubb3	Tubulin beta-4B chain;Tubulin beta-5 chain;Tubulin beta-2A chain;Tubulin beta-2B chain;Tubulin beta-6 chain;Tubulin beta-1 chain;Tubulin beta-4A chain;Tubulin beta-3 chain	no	no	2	0.029124	82.494	1	2552600	2552600
PVIGGHAGKTIIPLIS	FVAELKGLDPARVNVPVIGGHAGKTIIPLI	VIGGHAGKTIIPLISQCTPKVDFPQDQLAT	V	P	V	I	S	Q	1	0	0	0	0	0	0	3	1	4	1	1	0	0	2	1	1	0	0	1	0	0	16		1571.94	P08249	P08249	195	210	Mdh2	Malate dehydrogenase, mitochondrial	yes	yes	3	0.00071277	122.63	1	9057900	9057900
PVIGGHAGKTIIPLISQ	FVAELKGLDPARVNVPVIGGHAGKTIIPLI	IGGHAGKTIIPLISQCTPKVDFPQDQLATL	V	P	V	S	Q	C	1	0	0	0	0	1	0	3	1	4	1	1	0	0	2	1	1	0	0	1	0	0	17		1700	P08249	P08249	195	211	Mdh2	Malate dehydrogenase, mitochondrial	yes	yes	3	0.0047515	109.42	1	7920800	7920800
PVIGGHAGKTIIPLISQC	FVAELKGLDPARVNVPVIGGHAGKTIIPLI	GGHAGKTIIPLISQCTPKVDFPQDQLATLT	V	P	V	Q	C	T	1	0	0	0	1	1	0	3	1	4	1	1	0	0	2	1	1	0	0	1	0	0	18		1803.01	P08249	P08249	195	212	Mdh2	Malate dehydrogenase, mitochondrial	yes	yes	3	0.035464	75.674	1	2600500	2600500
PVLPPRRMWPLERF	LRRRWLKDQELSPREPVLPPRRMWPLERFW	EPVLPPRRMWPLERFWDNFLRDGAVWKNMV	E	P	V	R	F	W	0	3	0	0	0	0	1	0	0	0	2	0	1	1	4	0	0	1	0	1	0	0	14		1792.99	Q3UIU2	Q3UIU2	33	46	Ndufb6	NADH dehydrogenase [ubiquinone] 1 beta subcomplex subunit 6	yes	yes	4	0.00087674	125.61	1	1769900	1769900
PWVQKPIIF	GVQDIVVGEGTHFLIPWVQKPIIFDCRSRP	GTHFLIPWVQKPIIFDCRSRPRNVPVITGS	I	P	W	I	F	D	0	0	0	0	0	1	0	0	0	2	0	1	0	1	2	0	0	1	0	1	0	0	9		1126.65	P67778	P67778	59	67	Phb	Prohibitin	yes	yes	2	0.016319	100.74	1	75228	75228
PYPRIHFPLAT	GALNVDLTEFQTNLVPYPRIHFPLATYAPV	TNLVPYPRIHFPLATYAPVISAEKAYHEQL	V	P	Y	A	T	Y	1	1	0	0	0	0	0	0	1	1	1	0	0	1	3	0	1	0	1	0	0	0	11		1310.71	P68373;P68369;P05213;P05214	P68373	261	271	Tuba1c;Tuba1a;Tuba1b;Tuba3a	Tubulin alpha-1C chain;Tubulin alpha-1A chain;Tubulin alpha-1B chain;Tubulin alpha-3 chain	no	no	2	0.0039937	112.84	1	830580	830580
PYYGKLLQPKYLQPLL	YFGMGGYYGFPLQYYPYYGKLLQPKYLQPL	YYGKLLQPKYLQPLLAVQFTNLTVDTEIRV	Y	P	Y	L	L	A	0	0	0	0	0	2	0	1	0	0	5	2	0	0	3	0	0	0	3	0	0	0	16		1933.11	P14094	P14094	245	260	Atp1b1	Sodium/potassium-transporting ATPase subunit beta-1	yes	yes	3	0.0049062	109.6	1	796100	796100
QFLYPKTGVTGPYVL	YGGKVRLGLIPEEFFQFLYPKTGVTGPYVL	QFLYPKTGVTGPYVLGTGLSLYFLSKEIYV	F	Q	F	V	L	G	0	0	0	0	0	1	0	2	0	0	2	1	0	1	2	0	2	0	2	2	0	0	15		1681.91	Q9CQQ7	Q9CQQ7	65	79	Atp5f1	ATP synthase F(0) complex subunit B1, mitochondrial	yes	yes	2	0.026165	80.014	1	132530	132530
QINLNPLKEPLGF	VRQRFSRLSQRMSAFQINLNPLKEPLGFIK	AFQINLNPLKEPLGFIKILEWFASIFAFAT	F	Q	I	G	F	I	0	0	2	0	0	1	1	1	0	1	3	1	0	1	2	0	0	0	0	0	0	0	13		1481.82	O09117	O09117	23	35	Sypl1	Synaptophysin-like protein 1	yes	yes	2	0.011773	102.95	1	428700	428700
QLTHSLGGGTGSGMGTL	VVRKEAESCDCLQGFQLTHSLGGGTGSGMG	THSLGGGTGSGMGTLLISKIREEYPDRIMN	F	Q	L	T	L	L	0	0	0	0	0	1	0	6	1	0	3	0	1	0	0	2	3	0	0	0	0	0	17		1572.76	P68372;P99024;Q7TMM9;Q9CWF2;Q922F4;Q9D6F9;Q9ERD7	P68372	134	150	Tubb4b;Tubb5;Tubb2a;Tubb2b;Tubb6;Tubb4a;Tubb3	Tubulin beta-4B chain;Tubulin beta-5 chain;Tubulin beta-2A chain;Tubulin beta-2B chain;Tubulin beta-6 chain;Tubulin beta-4A chain;Tubulin beta-3 chain	no	no	2	3.207e-06	172.51	1	1264800	1264800
QLWDTAGQERF	FLSKTMYLEDRTVRLQLWDTAGQERFRSLI	TVRLQLWDTAGQERFRSLIPSYIRDSTVAV	L	Q	L	R	F	R	1	1	0	1	0	2	1	1	0	0	1	0	0	1	0	0	1	1	0	0	0	0	11		1349.64	P61294;P35279;Q8BHD0;Q99P58;Q9ERI2;O35963;Q64008;Q5RI75	P61294	65	75	Rab6b;Rab6a;Rab39a;Rab27b;Rab27a;Rab33b;Rab34;Rasef	Ras-related protein Rab-6B;Ras-related protein Rab-6A;Ras-related protein Rab-39A;Ras-related protein Rab-27B;Ras-related protein Rab-27A;Ras-related protein Rab-33B;Ras-related protein Rab-34;Ras and EF-hand domain-containing protein homolog	yes	no	2	0.00070977	144.17	1	1421400	1421400
QNFLPTVVHPGDL	GRMYLFYGNKTSVQFQNFLPTVVHPGDLQT	QFQNFLPTVVHPGDLQTQLAVQTKRVAAQV	F	Q	N	D	L	Q	0	0	1	1	0	1	0	1	1	0	2	0	0	1	2	0	1	0	0	2	0	0	13		1435.75	P17426	P17426	789	801	Ap2a1	AP-2 complex subunit alpha-1	yes	yes	2	0.0018944	123.86	1	411600	411600
QTNLVPYPRIHF	SLRFDGALNVDLTEFQTNLVPYPRIHFPLA	TEFQTNLVPYPRIHFPLATYAPVISAEKAY	F	Q	T	H	F	P	0	1	1	0	0	1	0	0	1	1	1	0	0	1	2	0	1	0	1	1	0	0	12		1483.79	P68373;P68369;P05213;P05214;Q9JJZ2;Q3UX10	P68373	256	267	Tuba1c;Tuba1a;Tuba1b;Tuba3a;Tuba8;Tubal3	Tubulin alpha-1C chain;Tubulin alpha-1A chain;Tubulin alpha-1B chain;Tubulin alpha-3 chain;Tubulin alpha-8 chain;Tubulin alpha chain-like 3	no	no	3	0.00053837	144.65	1	3209800	3209800
QTNLVPYPRIHFPLAT	SLRFDGALNVDLTEFQTNLVPYPRIHFPLA	TNLVPYPRIHFPLATYAPVISAEKAYHEQL	F	Q	T	A	T	Y	1	1	1	0	0	1	0	0	1	1	2	0	0	1	3	0	2	0	1	1	0	0	16		1866.02	P68373;P68369;P05213;P05214	P68373	256	271	Tuba1c;Tuba1a;Tuba1b;Tuba3a	Tubulin alpha-1C chain;Tubulin alpha-1A chain;Tubulin alpha-1B chain;Tubulin alpha-3 chain	no	no	2;3	4.1876e-11	252.37	2	17651000	17651000
QVKIWRRSYDVPPPPMEPDHPF	TGLNKAETAAKHGEAQVKIWRRSYDVPPPP	SYDVPPPPMEPDHPFYSNISKDRRYADLTE	A	Q	V	P	F	Y	0	2	0	2	0	1	1	0	1	1	0	1	1	1	6	1	0	1	1	2	0	0	22		2690.34	Q9DBJ1	Q9DBJ1	111	132	Pgam1	Phosphoglycerate mutase 1	yes	yes	4	0.001142	120.31	1	1502300	1502300
RAGVHIKLPHLGKHEKFSEVL	LGYILTCPSNLGTGLRAGVHIKLPHLGKHE	KLPHLGKHEKFSEVLKRLRLQKRGTGGVDT	L	R	A	V	L	K	1	1	0	0	0	0	2	2	3	1	3	3	0	1	1	1	0	0	0	2	0	0	21		2394.36	Q04447	Q04447	292	312	Ckb	Creatine kinase B-type	yes	yes	4	0.022968	78.708	1	1440100	1440100
RALPFWNE	EDQLPSCESLKDTIARALPFWNEEIVPQIK	SLKDTIARALPFWNEEIVPQIKEGKRVLIA	A	R	A	N	E	E	1	1	1	0	0	0	1	0	0	0	1	0	0	1	1	0	0	1	0	0	0	0	8		1031.52	Q9DBJ1;O70250	Q9DBJ1	162	169	Pgam1;Pgam2	Phosphoglycerate mutase 1;Phosphoglycerate mutase 2	yes	no	2	0.0050584	127.56	1	2548700	2548700
RASTAAPVASPAAPSPGSSGGGGF	ASPGATPGSATASAERASTAAPVASPAAPS	SPAAPSPGSSGGGGFFSSLSNAVKQTTAAA	E	R	A	G	F	F	6	1	0	0	0	0	0	5	0	0	0	0	0	1	4	5	1	0	0	1	0	0	24		2056	O88935	O88935	53	76	Syn1	Synapsin-1	yes	yes	2	0.017158	80.534	1	1117900	1117900
RELIPNIPFQML	MRFLYECPWRRLQELRELIPNIPFQMLLRG	QELRELIPNIPFQMLLRGANAVGYTNYPDN	L	R	E	M	L	L	0	1	1	0	0	1	1	0	0	2	2	0	1	1	2	0	0	0	0	0	0	0	12		1469.81	Q05920	Q05920	631	642	Pc	Pyruvate carboxylase, mitochondrial	yes	yes	2	0.029593	82.379	1	161960	161960
RGIWHNDNKTFL	PLLLASGMARDWPDARGIWHNDNKTFLVWI	PDARGIWHNDNKTFLVWINEEDHLRVISMQ	A	R	G	F	L	V	0	1	2	1	0	0	0	1	1	1	1	1	0	1	0	0	1	1	0	0	0	0	12		1499.76	Q04447	Q04447	215	226	Ckb	Creatine kinase B-type	yes	yes	3	0.042562	68.676	1	3826900	3826900
RGPIKTKQFAPIHAEAPEF	TLGRIMNVIGEPIDERGPIKTKQFAPIHAE	KTKQFAPIHAEAPEFIEMSVEQEILVTGIK	E	R	G	E	F	I	3	1	0	0	0	1	2	1	1	2	0	2	0	2	3	0	1	0	0	0	0	0	19		2136.15	P56480	P56480	155	173	Atp5b	ATP synthase subunit beta, mitochondrial	yes	yes	3	0.00039921	122.49	1	1949300	1949300
RKLAVNMVPFPRLHF	VTTCLRFPGQLNADLRKLAVNMVPFPRLHF	RKLAVNMVPFPRLHFFMPGFAPLTSRGSQQ	L	R	K	H	F	F	1	2	1	0	0	0	0	0	1	0	2	1	1	2	2	0	0	0	0	2	0	0	15		1824.03	P68372;P99024;Q7TMM9;Q9CWF2;Q922F4;A2AQ07;Q9D6F9;Q9ERD7	P68372	251	265	Tubb4b;Tubb5;Tubb2a;Tubb2b;Tubb6;Tubb1;Tubb4a;Tubb3	Tubulin beta-4B chain;Tubulin beta-5 chain;Tubulin beta-2A chain;Tubulin beta-2B chain;Tubulin beta-6 chain;Tubulin beta-1 chain;Tubulin beta-4A chain;Tubulin beta-3 chain	no	no	4	0.0019967	113.35	1	6102400	6102400
RLEKPAKYDDIKKVVKQASEGPLKGILG	FRVPTPNVSVVDLTCRLEKPAKYDDIKKVV	VVKQASEGPLKGILGYTEDQVVSCDFNSNS	C	R	L	L	G	Y	2	1	0	2	0	1	2	3	0	2	3	6	0	0	2	1	0	0	1	2	0	0	28		3079.78	P16858	P16858	246	273	Gapdh	Glyceraldehyde-3-phosphate dehydrogenase	yes	yes	4;5	8.4927e-09	175.15	2	7072100	7072100
RTLKLATPTYGDL	ETYCIDNEALYDICFRTLKLATPTYGDLNH	CFRTLKLATPTYGDLNHLVSATMSGVTTSL	F	R	T	D	L	N	1	1	0	1	0	0	0	1	0	0	3	1	0	0	1	0	3	0	1	0	0	0	13		1447.8	Q9ERD7	Q9ERD7	213	225	Tubb3	Tubulin beta-3 chain	yes	yes	2	0.014446	120.57	1	1104000	1104000
RTLKLTTPTYGDL	ETYCIDNEALYDICFRTLKLTTPTYGDLNH	CFRTLKLTTPTYGDLNHLVSATMSGVTTCL	F	R	T	D	L	N	0	1	0	1	0	0	0	1	0	0	3	1	0	0	1	0	4	0	1	0	0	0	13		1477.81	P68372;P99024;Q7TMM9;Q9CWF2;Q922F4;Q9D6F9	P68372	213	225	Tubb4b;Tubb5;Tubb2a;Tubb2b;Tubb6;Tubb4a	Tubulin beta-4B chain;Tubulin beta-5 chain;Tubulin beta-2A chain;Tubulin beta-2B chain;Tubulin beta-6 chain;Tubulin beta-4A chain	no	no	3	0.0011281	126.83	1	13513000	13513000
RTLKLTTPTYGDLNHLVS	ETYCIDNEALYDICFRTLKLTTPTYGDLNH	KLTTPTYGDLNHLVSATMSGVTTCLRFPGQ	F	R	T	V	S	A	0	1	1	1	0	0	0	1	1	0	4	1	0	0	1	1	4	0	1	1	0	0	18		2028.1	P68372;P99024;Q7TMM9;Q9CWF2;Q922F4;Q9D6F9	P68372	213	230	Tubb4b;Tubb5;Tubb2a;Tubb2b;Tubb6;Tubb4a	Tubulin beta-4B chain;Tubulin beta-5 chain;Tubulin beta-2A chain;Tubulin beta-2B chain;Tubulin beta-6 chain;Tubulin beta-4A chain	no	no	3	0.0005664	117.55	1	3773700	3773700
RVDFNVPMKNNQITNNQ	LTLDKLDVKGKRVVMRVDFNVPMKNNQITN	DFNVPMKNNQITNNQRIKAAVPSIKFCLDN	M	R	V	N	Q	R	0	1	5	1	0	2	0	0	0	1	0	1	1	1	1	0	1	0	0	2	0	0	17		2031	P09411;P09041	P09411	22	38	Pgk1;Pgk2	Phosphoglycerate kinase 1;Phosphoglycerate kinase 2	yes	no	3	0.034102	73.918	1	829910	829910
RVLDPFTIKPLDRKLIL	ALAAAESLKKDKISIRVLDPFTIKPLDRKL	LDPFTIKPLDRKLILDSARATKGRILTVED	I	R	V	I	L	D	0	2	0	2	0	0	0	0	0	2	4	2	0	1	2	0	1	0	0	1	0	0	17		2036.25	P40142	P40142	530	546	Tkt	Transketolase	yes	yes	4	0.00041063	132.64	1	3010600	3010600
SDYPPLGRF	IVDMVPGKPMCVESFSDYPPLGRFAVRDMR	MCVESFSDYPPLGRFAVRDMRQTVAVGVIK	F	S	D	R	F	A	0	1	0	1	0	0	0	1	0	0	1	0	0	1	2	1	0	0	1	0	0	0	9		1050.51	P10126	P10126	416	424	Eef1a1	Elongation factor 1-alpha 1	yes	yes	2	0.027503	86.953	1	1404500	1404500
SFKNMVPQQAL	CFSYYQEAKSSKIMESFKNMVPQQALVIRE	KIMESFKNMVPQQALVIREGEKMQVNAEEV	E	S	F	A	L	V	1	0	1	0	0	2	0	0	0	0	1	1	1	1	1	1	0	0	0	1	0	0	11		1261.65	Q6PIC6;Q9WV27;Q6PIE5;Q8VDN2	Q6PIC6	150	160	Atp1a3;Atp1a4;Atp1a2;Atp1a1	Sodium/potassium-transporting ATPase subunit alpha-3;Sodium/potassium-transporting ATPase subunit alpha-4;Sodium/potassium-transporting ATPase subunit alpha-2;Sodium/potassium-transporting ATPase subunit alpha-1	no	no	2	0.0016145	130.41	1	2723700	2723700
SFTLPYPVKM	AVIQSIPVFNESGRFSFTLPYPVKMKVRFS	ESGRFSFTLPYPVKMKVRFSFFLQVYLVML	F	S	F	K	M	K	0	0	0	0	0	0	0	0	0	0	1	1	1	1	2	1	1	0	1	1	0	0	10		1181.62	Q8K2C9	Q8K2C9	311	320	Hacd3	Very-long-chain (3R)-3-hydroxyacyl-CoA dehydratase 3	yes	yes	2	8.0396e-05	161.92	1	702650	702650
SGVTTCLRFPGQL	TPTYGDLNHLVSATMSGVTTCLRFPGQLNA	TMSGVTTCLRFPGQLNADLRKLAVNMVPFP	M	S	G	Q	L	N	0	1	0	0	1	1	0	2	0	0	2	0	0	1	1	1	2	0	0	1	0	0	13		1377.71	P68372;P99024;Q7TMM9;Q9CWF2;Q9D6F9	P68372	234	246	Tubb4b;Tubb5;Tubb2a;Tubb2b;Tubb4a	Tubulin beta-4B chain;Tubulin beta-5 chain;Tubulin beta-2A chain;Tubulin beta-2B chain;Tubulin beta-4A chain	no	no	2	0.028807	72.006	1	0	0
SHYEEGPGKNLPFSVE	LGQSIRRFTTSVVRRSHYEEGPGKNLPFSV	HYEEGPGKNLPFSVENKWRLLAMMTVYFGS	R	S	H	V	E	N	0	0	1	0	0	0	3	2	1	0	1	1	0	1	2	2	0	0	1	1	0	0	16		1788.83	P17665	P17665	17	32	Cox7c	Cytochrome c oxidase subunit 7C, mitochondrial	yes	yes	2	6.4333e-07	177.16	1	574580	574580
SIYPAPQVST	ERLSVDYGKKSKLEFSIYPAPQVSTAVVEP	SKLEFSIYPAPQVSTAVVEPYNSILTTHTT	F	S	I	S	T	A	1	0	0	0	0	1	0	0	0	1	0	0	0	0	2	2	1	0	1	1	0	0	10		1061.54	P68373;P68369;P05213	P68373	170	179	Tuba1c;Tuba1a;Tuba1b	Tubulin alpha-1C chain;Tubulin alpha-1A chain;Tubulin alpha-1B chain	no	no	2	0.034296	76.17	1	2423500	2423500
SIYPAPQVSTA	ERLSVDYGKKSKLEFSIYPAPQVSTAVVEP	KLEFSIYPAPQVSTAVVEPYNSILTTHTTL	F	S	I	T	A	V	2	0	0	0	0	1	0	0	0	1	0	0	0	0	2	2	1	0	1	1	0	0	11		1132.58	P68373;P68369;P05213	P68373	170	180	Tuba1c;Tuba1a;Tuba1b	Tubulin alpha-1C chain;Tubulin alpha-1A chain;Tubulin alpha-1B chain	no	no	2	1.78e-08	202.05	1	12073000	12073000
SLPLNPKPFL	______________________________	______________________________	M	S	L	F	L	N	0	0	1	0	0	0	0	0	0	0	3	1	0	1	3	1	0	0	0	0	0	0	10		1124.66	P62307	P62307	2	11	Snrpf	Small nuclear ribonucleoprotein F	yes	yes	2	0.0031491	118.33	1	0	0
SLSGAQIDDNIPRRTTQRIVAPPGGRA	KQQAPPVRNLHQSGFSLSGAQIDDNIPRRT	RRTTQRIVAPPGGRANITSLG_________	F	S	L	R	A	N	3	4	1	2	0	2	0	3	0	3	1	0	0	0	3	2	2	0	0	1	0	0	27		2845.53	O08553	O08553	540	566	Dpysl2	Dihydropyrimidinase-related protein 2	yes	yes	4	0.0031024	107.83	1	1443300	1443300
SLSRMTPPLPARVDF	RGLGPSRQLGTMPRFSLSRMTPPLPARVDF	SLSRMTPPLPARVDFSLAGALNAGFKETRA	F	S	L	D	F	S	1	2	0	1	0	0	0	0	0	0	2	0	1	1	3	2	1	0	0	1	0	0	15		1685.89	P03995	P03995	35	49	Gfap	Glial fibrillary acidic protein	yes	yes	3	0.025781	77.746	1	0	0
SQITNNIDPVGRIQM	NQIRDARKACADATLSQITNNIDPVGRIQM	SQITNNIDPVGRIQMRTRRTLRGHLAKIYA	L	S	Q	Q	M	R	0	1	2	1	0	2	0	1	0	3	0	0	1	0	1	1	1	0	0	1	0	0	15		1684.86	P62874	P62874	31	45	Gnb1	Guanine nucleotide-binding protein G(I)/G(S)/G(T) subunit beta-1	yes	yes	2	0.00011873	150.11	1	1377900	1377900
SRMESPIPILPLPTPDAET	RAHCIQQMTSKLTQDSRMESPIPILPLPTP	SPIPILPLPTPDAETEKLIRMKDEELRRMQ	D	S	R	E	T	E	1	1	0	1	0	0	2	0	0	2	2	0	1	0	5	2	2	0	0	0	0	0	19		2063.06	Q9Z2Q6	Q9Z2Q6	323	341	2023-09-05	Septin-5	yes	yes	2	0.00042841	120.14	1	184530	184530
SSSGAKEKPELQF	RKSHTFLPKLFFRKMSSSGAKEKPELQFPF	KMSSSGAKEKPELQFPFLQDEDTVATLHEC	M	S	S	Q	F	P	1	0	0	0	0	1	2	1	0	0	1	2	0	1	1	3	0	0	0	0	0	0	13		1406.7	P16330	P16330	22	34	Cnp	2,3-cyclic-nucleotide 3-phosphodiesterase	yes	yes	2	9.1813e-07	190.36	1	0	0
STMDHARHGFLPRHRDTGIL	SQKRPSQRSKYLATASTMDHARHGFLPRHR	ARHGFLPRHRDTGILDSIGRFFSGDRGAPK	A	S	T	I	L	D	1	3	0	2	0	0	0	2	3	1	2	0	1	1	1	1	2	0	0	0	0	0	20		2316.17	P04370	P04370	151	170	Mbp	Myelin basic protein	yes	yes	4	0.01981	85.974	1	14097000	14097000
SVRSGPFGQLFRPDNF	VPRAALVDLEPGTMDSVRSGPFGQLFRPDN	VRSGPFGQLFRPDNFIFGQTGAGNNWAKGH	D	S	V	N	F	I	0	2	1	1	0	1	0	2	0	0	1	0	0	3	2	2	0	0	0	1	0	0	16		1822.91	Q922F4	Q922F4	75	90	Tubb6	Tubulin beta-6 chain	yes	yes	3	0.0029252	91.475	1	3010700	3010700
SWLGHEGLGEPTVL	SCMVPDNCPELRPELSWLGHEGLGEPTVLG	LSWLGHEGLGEPTVLGRLREDEGTWVQVSL	L	S	W	V	L	G	0	0	0	0	0	0	2	3	1	0	3	0	0	0	1	1	1	1	0	1	0	0	14		1493.75	P20917	P20917	173	186	Mag	Myelin-associated glycoprotein	yes	yes	2	1.0927e-10	198.25	1	3011600	3011600
SYTDANKNKGITWGEDTL	LHGLFGRKTGQAAGFSYTDANKNKGITWGE	DANKNKGITWGEDTLMEYLENPKKYIPGTK	F	S	Y	T	L	M	1	0	2	2	0	0	1	2	0	1	1	2	0	0	0	1	3	1	1	0	0	0	18		2011.95	P62897	P62897	48	65	Cycs	Cytochrome c, somatic	yes	yes	3	0.028157	78.501	1	607640	607640
TCRLEKPAKYDDIKKVVKQASEGPLKGIL	MAFRVPTPNVSVVDLTCRLEKPAKYDDIKK	KVVKQASEGPLKGILGYTEDQVVSCDFNSN	L	T	C	I	L	G	2	1	0	2	1	1	2	2	0	2	3	6	0	0	2	1	1	0	1	2	0	0	29		3226.81	P16858	P16858	244	272	Gapdh	Glyceraldehyde-3-phosphate dehydrogenase	yes	yes	5	3.88e-14	213.84	1	5065200	5065200
TCRLEKPAKYDDIKKVVKQASEGPLKGILG	MAFRVPTPNVSVVDLTCRLEKPAKYDDIKK	VVKQASEGPLKGILGYTEDQVVSCDFNSNS	L	T	C	L	G	Y	2	1	0	2	1	1	2	3	0	2	3	6	0	0	2	1	1	0	1	2	0	0	30		3283.83	P16858	P16858	244	273	Gapdh	Glyceraldehyde-3-phosphate dehydrogenase	yes	yes	4;5	2.6275e-29	294.49	2	13610000	13610000
TDAAVSFAKDFLAGGVAAAISKTAVAPIERVKLLL	______________________________	SKTAVAPIERVKLLLQVQHASKQITADKQY	M	T	D	L	L	Q	9	1	0	2	0	0	1	2	0	2	4	3	0	2	1	2	2	0	0	4	0	0	35		3513	P51881	P51881	2	36	Slc25a5	ADP/ATP translocase 2;ADP/ATP translocase 2, N-terminally processed	yes	yes	4	4.4329e-15	211.77	1	0	0
TEFQTNLVPYPRIHFPLAT	ITASLRFDGALNVDLTEFQTNLVPYPRIHF	TNLVPYPRIHFPLATYAPVISAEKAYHEQL	L	T	E	A	T	Y	1	1	1	0	0	1	1	0	1	1	2	0	0	2	3	0	3	0	1	1	0	0	19		2243.17	P68373;P68369;P05213;P05214	P68373	253	271	Tuba1c;Tuba1a;Tuba1b;Tuba3a	Tubulin alpha-1C chain;Tubulin alpha-1A chain;Tubulin alpha-1B chain;Tubulin alpha-3 chain	no	no	3	1.429e-11	195.96	1	528130	528130
TEIPGPLGSGLMPPLPF	KPEEEAVSSSQSPTATEIPGPLGSGLMPPL	IPGPLGSGLMPPLPFFNKQKAIDLLYWRDI	A	T	E	P	F	F	0	0	0	0	0	0	1	3	0	1	3	0	1	1	5	1	1	0	0	0	0	0	17		1721.91	Q8K0T0	Q8K0T0	571	587	Rtn1	Reticulon-1	yes	yes	2	0.02485	84.17	1	69925	69925
TELPPTHPIRLGL	ENSLVAYKAASDIAMTELPPTHPIRLGLAL	AMTELPPTHPIRLGLALNFSVFYYEILNSP	M	T	E	G	L	A	0	1	0	0	0	0	1	1	1	1	3	0	0	0	3	0	2	0	0	0	0	0	13		1442.82	P62259	P62259	161	173	Ywhae	14-3-3 protein epsilon	yes	yes	2;3	0.0027121	117.52	2	5727100	5727100
TFDPKPIPGNW	RFILHRVCEDFGVIATFDPKPIPGNWNGAG	GVIATFDPKPIPGNWNGAGCHTNFSTKAMR	A	T	F	N	W	N	0	0	1	1	0	0	0	1	0	1	0	1	0	1	3	0	1	1	0	0	0	0	11		1270.63	P15105	P15105	237	247	Glul	Glutamine synthetase	yes	yes	2	0.0041022	112.71	1	4142700	4142700
TINGVQYPLSPSAY	VISCSSIDSLPDIVFTINGVQYPLSPSAYI	FTINGVQYPLSPSAYILQDDDSCTSGFEGM	F	T	I	A	Y	I	1	0	1	0	0	1	0	1	0	1	1	0	0	0	2	2	1	0	2	1	0	0	14		1508.75	P00791	P00791	320	333			yes	yes	2	0.0061863	108.9	1	2506600	2506600
TKLTPFIL	HKVFEGNRPTNSIVFTKLTPFILGALIAMY	PTNSIVFTKLTPFILGALIAMYEHKIFVQG	F	T	K	I	L	G	0	0	0	0	0	0	0	0	0	1	2	1	0	1	1	0	2	0	0	0	0	0	8		931.574	P06745	P06745	480	487	Gpi	Glucose-6-phosphate isomerase	yes	yes	2	0.0035377	137.18	1	2671200	2671200
TKVPVGDQPPDIEF	SPHVLNLTLVDLPGMTKVPVGDQPPDIEFQ	MTKVPVGDQPPDIEFQIRDMLMQFVTKENC	M	T	K	E	F	Q	0	0	0	2	0	1	1	1	0	1	0	1	0	1	3	0	1	0	0	2	0	0	14		1540.78	P39053	P39053	141	154	Dnm1	Dynamin-1	yes	yes	2	0.00032924	143.76	1	2942500	2942500
TLIPEGTNGTEERM	CTFNTAQKAVGKDNFTLIPEGTNGTEERMS	FTLIPEGTNGTEERMSVIWDKAVVTGKMDE	F	T	L	R	M	S	0	1	1	0	0	0	3	2	0	1	1	0	1	0	1	0	3	0	0	0	0	0	14		1546.73	O08553	O08553	349	362	Dpysl2	Dihydropyrimidinase-related protein 2	yes	yes	2	0.00086208	126.1	1	5690700	5690700
TLKGLTPTGML	ARVFSVLREESESVLTLKGLTPTGMLPSGV	ESVLTLKGLTPTGMLPSGVLAGGRQTLQSA	L	T	L	M	L	P	0	0	0	0	0	0	0	2	0	0	3	1	1	0	1	0	3	0	0	0	0	0	11		1130.64	P63328;P48453	P48453	432	442	Ppp3ca;Ppp3cb	Serine/threonine-protein phosphatase 2B catalytic subunit alpha isoform;Serine/threonine-protein phosphatase 2B catalytic subunit beta isoform	no	no	2	0.0008529	142	1	2877900	2877900
TLKGLTPTGMLPSGVL	ARVFSVLREESESVLTLKGLTPTGMLPSGV	LKGLTPTGMLPSGVLAGGRQTLQSATVEAI	L	T	L	V	L	A	0	0	0	0	0	0	0	3	0	0	4	1	1	0	2	1	3	0	0	1	0	0	16		1583.9	P63328;P48453	P48453	432	447	Ppp3ca;Ppp3cb	Serine/threonine-protein phosphatase 2B catalytic subunit alpha isoform;Serine/threonine-protein phosphatase 2B catalytic subunit beta isoform	no	no	2	4.6695e-07	181.98	1	744740	744740
TNLVPYPRIHFPLAT	LRFDGALNVDLTEFQTNLVPYPRIHFPLAT	TNLVPYPRIHFPLATYAPVISAEKAYHEQL	Q	T	N	A	T	Y	1	1	1	0	0	0	0	0	1	1	2	0	0	1	3	0	2	0	1	1	0	0	15		1737.96	P68373;P68369;P05213;P05214	P68373	257	271	Tuba1c;Tuba1a;Tuba1b;Tuba3a	Tubulin alpha-1C chain;Tubulin alpha-1A chain;Tubulin alpha-1B chain;Tubulin alpha-3 chain	no	no	2	0.027856	83.314	1	461440	461440
TPKVDFPQDQL	GGHAGKTIIPLISQCTPKVDFPQDQLATLT	ISQCTPKVDFPQDQLATLTGRIQEAGTEVV	C	T	P	Q	L	A	0	0	0	2	0	2	0	0	0	0	1	1	0	1	2	0	1	0	0	1	0	0	11		1286.65	P08249	P08249	213	223	Mdh2	Malate dehydrogenase, mitochondrial	yes	yes	2	0.00096805	140.24	1	3372200	3372200
TQHIPVLVPGIIF	FNMLTELVNVLPGALTQHIPVLVPGIIFSL	ALTQHIPVLVPGIIFSLNDKSSSSNLKIDA	L	T	Q	I	F	S	0	0	0	0	0	1	0	1	1	3	1	0	0	1	2	0	1	0	0	2	0	0	13		1432.84	Q6ZQ38	Q6ZQ38	470	482	Cand1	Cullin-associated NEDD8-dissociated protein 1	yes	yes	2	0.01829	95.573	1	179530	179530
TQIPQIQKTEISF	ELKPTYQDRVAPPGLTQIPQIQKTEISFRP	GLTQIPQIQKTEISFRPNDPKSYEAYVLNI	L	T	Q	S	F	R	0	0	0	0	0	3	1	0	0	3	0	1	0	1	1	1	2	0	0	0	0	0	13		1531.82	P14094	P14094	78	90	Atp1b1	Sodium/potassium-transporting ATPase subunit beta-1	yes	yes	2	0.00060798	172.74	1	6782500	6782500
TSNIPEITPFL	RLIFDNLKKSIAYTLTSNIPEITPFLLFIM	AYTLTSNIPEITPFLLFIMANIPLPLGTIT	L	T	S	F	L	L	0	0	1	0	0	0	1	0	0	2	1	0	0	1	2	1	2	0	0	0	0	0	11		1230.65	Q6PIC6;Q9WV27;Q6PIE5;Q8VDN2	Q6PIC6	771	781	Atp1a3;Atp1a4;Atp1a2;Atp1a1	Sodium/potassium-transporting ATPase subunit alpha-3;Sodium/potassium-transporting ATPase subunit alpha-4;Sodium/potassium-transporting ATPase subunit alpha-2;Sodium/potassium-transporting ATPase subunit alpha-1	no	no	2	1.8585e-08	200.6	1	3896500	3896500
TTKTYFPHF	EYGAEALERMFASFPTTKTYFPHFDVSHGS	MFASFPTTKTYFPHFDVSHGSAQVKGHGKK	P	T	T	H	F	D	0	0	0	0	0	0	0	0	1	0	0	1	0	2	1	0	3	0	1	0	0	0	9		1140.56	P01942	P01942	39	47	Hba	Hemoglobin subunit alpha	yes	yes	2	0.034828	77.923	1	2140600	2140600
TTMEKAGAHLKGGAKRVIISAPSADAPMF	GEAGAEYVVESTGVFTTMEKAGAHLKGGAK	KRVIISAPSADAPMFVMGVNHEKYDNSLKI	F	T	T	M	F	V	6	1	0	1	0	0	1	3	1	2	1	3	2	1	2	2	2	0	0	1	0	0	29		2954.55	P16858	P16858	101	129	Gapdh	Glyceraldehyde-3-phosphate dehydrogenase	yes	yes	3;5	2.6509e-15	233.44	2	22601000	22601000
TVLKYLPGPLQDM	GCGDEEEEEEESILDTVLKYLPGPLQDMFK	LDTVLKYLPGPLQDMFKK____________	D	T	V	D	M	F	0	0	0	1	0	1	0	1	0	0	3	1	1	0	2	0	1	0	1	1	0	0	13		1473.79	P84086	P84086	119	131	Cplx2	Complexin-2	yes	yes	2	0.012514	91.858	1	353550	353550
TVVEPYNATL	IMNTFSVVPSPKVSDTVVEPYNATLSVHQL	PKVSDTVVEPYNATLSVHQLVENTDETYCI	D	T	V	T	L	S	1	0	1	0	0	0	1	0	0	0	1	0	0	0	1	0	2	0	1	2	0	0	10		1105.57	P68372;P99024;Q7TMM9;Q9CWF2;Q922F4;Q9D6F9;Q9ERD7	P68372	178	187	Tubb4b;Tubb5;Tubb2a;Tubb2b;Tubb6;Tubb4a;Tubb3	Tubulin beta-4B chain;Tubulin beta-5 chain;Tubulin beta-2A chain;Tubulin beta-2B chain;Tubulin beta-6 chain;Tubulin beta-4A chain;Tubulin beta-3 chain	no	no	2	0.0014891	138.06	1	6945100	6945100
TVWDVGGQDKIRPLWRHYFQNTQG	IGFNVETVEYKNICFTVWDVGGQDKIRPLW	KIRPLWRHYFQNTQGLIFVVDSNDRERVQE	F	T	V	Q	G	L	0	2	1	2	0	3	0	3	1	1	1	1	0	1	1	0	2	2	1	2	0	0	24		2900.45	P84084;P61750;Q8BSL7;P84078;P61205	P84084	64	87	Arf5;Arf4;Arf2;Arf1;Arf3	ADP-ribosylation factor 5;ADP-ribosylation factor 4;ADP-ribosylation factor 2;ADP-ribosylation factor 1;ADP-ribosylation factor 3	yes	no	4	3.3893e-05	146.76	1	6027900	6027900
TYKTVSGVNGPLVIL	QALAVSRNYLSQPRLTYKTVSGVNGPLVIL	TYKTVSGVNGPLVILDHVKFPRYAEIVHLT	L	T	Y	I	L	D	0	0	1	0	0	0	0	2	0	1	2	1	0	0	1	1	2	0	1	3	0	0	15		1559.89	P62814	P62814	46	60	Atp6v1b2	V-type proton ATPase subunit B, brain isoform	yes	yes	2	9.139e-11	196.27	1	1171400	1171400
VALSHIAGL	EDQSGTSFDKSSHTWVALSHIAGLCNRAVF	KSSHTWVALSHIAGLCNRAVFKGGQDNIPV	W	V	A	G	L	C	2	0	0	0	0	0	0	1	1	1	2	0	0	0	0	1	0	0	0	1	0	0	9		879.518	Q6PIC6	Q6PIC6	409	417	Atp1a3	Sodium/potassium-transporting ATPase subunit alpha-3	yes	yes	2	0.0041728	123.1	1	1557100	1557100
VATLPIPVVF	YFPNWAMALLITLIAVATLPIPVVFILRHF	ITLIAVATLPIPVVFILRHFHLLSDGSNTL	A	V	A	V	F	I	1	0	0	0	0	0	0	0	0	1	1	0	0	1	2	0	1	0	0	3	0	0	10		1054.64	Q8BJI1	Q8BJI1	627	636	Slc6a17	Sodium-dependent neutral amino acid transporter SLC6A17	yes	yes	2	0.0067647	110.36	1	89708	89708
VDEKPASTPWGSKMPFGQL	SCDFKCRVFSAYIKEVDEKPASTPWGSKMP	PASTPWGSKMPFGQLMSEFGGSGTGGWVHG	E	V	D	Q	L	M	1	0	0	1	0	1	1	2	0	0	1	2	1	1	3	2	1	1	0	1	0	0	19		2074.02	Q9R0Q6	Q9R0Q6	176	194	Arpc1a	Actin-related protein 2/3 complex subunit 1A	yes	yes	3	2.7524e-07	172.55	1	1904900	1904900
VDLPAVSEKDIQD	GSLGSKKGVNLPGAAVDLPAVSEKDIQDLK	AAVDLPAVSEKDIQDLKFGVEQDVDMVFAS	A	V	D	Q	D	L	1	0	0	3	0	1	1	0	0	1	1	1	0	0	1	1	0	0	0	2	0	0	13		1427.71	P52480	P52480	216	228	Pkm	Pyruvate kinase PKM	yes	yes	2	0.00091277	132.17	1	1636200	1636200
VEIKGGDRVPADL	EKMQVNAEEVVVGDLVEIKGGDRVPADLRI	DLVEIKGGDRVPADLRIISAHGCKVDNSSL	L	V	E	D	L	R	1	1	0	2	0	0	1	2	0	1	1	1	0	0	1	0	0	0	0	2	0	0	13		1367.74	Q6PIC6	Q6PIC6	181	193	Atp1a3	Sodium/potassium-transporting ATPase subunit alpha-3	yes	yes	2	0.02606	86.772	1	5561000	5561000
VEIPFNSTNKYQL	CCGSVMEMREKYSKIVEIPFNSTNKYQLSI	KIVEIPFNSTNKYQLSIHKNPNASEPKHLL	I	V	E	Q	L	S	0	0	2	0	0	1	1	0	0	1	1	1	0	1	1	1	1	0	1	1	0	0	13		1551.79	Q8VDN2	Q8VDN2	478	490	Atp1a1	Sodium/potassium-transporting ATPase subunit alpha-1	yes	yes	2	0.011345	103.44	1	890080	890080
VELPLRHPAL	DIGGCRKQLAQIKEMVELPLRHPALFKAIG	QIKEMVELPLRHPALFKAIGVKPPRGILLY	M	V	E	A	L	F	1	1	0	0	0	0	1	0	1	0	3	0	0	0	2	0	0	0	0	1	0	0	10		1143.68	Q01853	Q01853	220	229	Vcp	Transitional endoplasmic reticulum ATPase	yes	yes	3	0.021116	92.538	1	734050	734050
VEVMPQNQKAIGNAL	AGRKLALKTIDWVSFVEVMPQNQKAIGNAL	VEVMPQNQKAIGNALKSWNETFHARLASLS	F	V	E	A	L	K	2	0	2	0	0	2	1	1	0	1	1	1	1	0	1	0	0	0	0	2	0	0	15		1610.85	Q9DCX2	Q9DCX2	17	31	Atp5h	ATP synthase subunit d, mitochondrial	yes	yes	2	0.032543	74.698	1	841110	841110
VEWIPNNVKT	DEQMLNVQNKNSSYFVEWIPNNVKTAVCDI	NSSYFVEWIPNNVKTAVCDIPPRGLKMSAT	F	V	E	K	T	A	0	0	2	0	0	0	1	0	0	1	0	1	0	0	1	0	1	1	0	2	0	0	10		1198.63	P68372;P99024;Q7TMM9;Q9CWF2;Q9D6F9	P68372	342	351	Tubb4b;Tubb5;Tubb2a;Tubb2b;Tubb4a	Tubulin beta-4B chain;Tubulin beta-5 chain;Tubulin beta-2A chain;Tubulin beta-2B chain;Tubulin beta-4A chain	no	no	2	6.305e-07	196.27	1	12284000	12284000
VFDMDGIPRVDVL	KAVPFPPTHRLTSEEVFDMDGIPRVDVLKN	EEVFDMDGIPRVDVLKNHLVKEGRVDEEIA	E	V	F	V	L	K	0	1	0	3	0	0	0	1	0	1	1	0	1	1	1	0	0	0	0	3	0	0	13		1474.75	P48453	P48453	43	55	Ppp3cb	Serine/threonine-protein phosphatase 2B catalytic subunit beta isoform	yes	yes	2	0.0014132	119.76	1	245390	245390
VFDNDGKPRVDIL	KAVPFPPSHRLTAKEVFDNDGKPRVDILKA	KEVFDNDGKPRVDILKAHLMKEGRLEESVA	E	V	F	I	L	K	0	1	1	3	0	0	0	1	0	1	1	1	0	1	1	0	0	0	0	2	0	0	13		1486.78	P63328	P63328	34	46	Ppp3ca	Serine/threonine-protein phosphatase 2B catalytic subunit alpha isoform	yes	yes	3	0.028711	83.769	1	2180700	2180700
VFHSFGGGTGSGF	IRKLADQCTGLQGFLVFHSFGGGTGSGFTS	FLVFHSFGGGTGSGFTSLLMERLSVDYGKK	L	V	F	G	F	T	0	0	0	0	0	0	0	5	1	0	0	0	0	3	0	2	1	0	0	1	0	0	13		1255.56	P68373;P68369;P05213	P68373	137	149	Tuba1c;Tuba1a;Tuba1b	Tubulin alpha-1C chain;Tubulin alpha-1A chain;Tubulin alpha-1B chain	no	no	2	9.2997e-28	348.32	1	9196700	9196700
VFLPKPSWGNHTPIF	VGASFLQRFFKFSRDVFLPKPSWGNHTPIF	VFLPKPSWGNHTPIFRDAGMQLQGYRYYDP	D	V	F	I	F	R	0	0	1	0	0	0	0	1	1	1	1	1	0	2	3	1	1	1	0	1	0	0	15		1738.92	P05202	P05202	155	169	Got2	Aspartate aminotransferase, mitochondrial	yes	yes	2;3	3.22e-07	187.78	2	17069000	17069000
VFTGHMGKLVPLKE	RKIQRFLSQPFQVAEVFTGHMGKLVPLKET	EVFTGHMGKLVPLKETIKGFQQILAGEYDH	E	V	F	K	E	T	0	0	0	0	0	0	1	2	1	0	2	2	1	1	1	0	1	0	0	2	0	0	14		1554.86	P56480	P56480	473	486	Atp5b	ATP synthase subunit beta, mitochondrial	yes	yes	2;3;4	0.023525	84.842	3	12789000	12789000
VGDVGQTVDDPYTTF	EDKKNIILEEGKEILVGDVGQTVDDPYTTF	VGDVGQTVDDPYTTFVKMLPDKDCRYALYD	L	V	G	T	F	V	0	0	0	3	0	1	0	2	0	0	0	0	0	1	1	0	3	0	1	3	0	0	15		1612.73	P18760	P18760	57	71	Cfl1	Cofilin-1	yes	yes	2	0.0005194	134.75	1	3403400	3403400
VGGISDTNQIFGL	GTGSMTGILGYDTVQVGGISDTNQIFGLSE	VQVGGISDTNQIFGLSETEPGSFLYYAPFD	Q	V	G	G	L	S	0	0	1	1	0	1	0	3	0	2	1	0	0	1	0	1	1	0	0	1	0	0	13		1319.67	P00791	P00791	150	162			yes	yes	2	6.9331e-10	230.24	1	1129200	1129200
VGGISDTNQIFGLS	GTGSMTGILGYDTVQVGGISDTNQIFGLSE	QVGGISDTNQIFGLSETEPGSFLYYAPFDG	Q	V	G	L	S	E	0	0	1	1	0	1	0	3	0	2	1	0	0	1	0	2	1	0	0	1	0	0	14		1406.7	P00791	P00791	150	163			yes	yes	2	1.7682e-16	237.84	1	1944700	1944700
VGGISDTNQIFGLSETEPGSF	GTGSMTGILGYDTVQVGGISDTNQIFGLSE	TNQIFGLSETEPGSFLYYAPFDGILGLAYP	Q	V	G	S	F	L	0	0	1	1	0	1	2	4	0	2	1	0	0	2	1	3	2	0	0	1	0	0	21		2154.01	P00791	P00791	150	170			yes	yes	2	1.3335e-07	178.67	1	351880	351880
VGGISDTNQIFGLSETEPGSFL	GTGSMTGILGYDTVQVGGISDTNQIFGLSE	NQIFGLSETEPGSFLYYAPFDGILGLAYPS	Q	V	G	F	L	Y	0	0	1	1	0	1	2	4	0	2	2	0	0	2	1	3	2	0	0	1	0	0	22		2267.1	P00791	P00791	150	171			yes	yes	2;3	1.8117e-07	166.38	2	350950	350950
VGGRWLPAPATF	GPGGLHADLLRGDSFVGGRWLPAPATFPVY	DSFVGGRWLPAPATFPVYDPASGAKLGTVA	F	V	G	T	F	P	2	1	0	0	0	0	0	2	0	0	1	0	0	1	2	0	1	1	0	1	0	0	12		1270.68	Q8BWF0	Q8BWF0	53	64	Aldh5a1	Succinate-semialdehyde dehydrogenase, mitochondrial	yes	yes	2	0.004035	111.46	1	1241700	1241700
VGGSTRIPKIQKLLQD	RDAKLDKSQIHDIVLVGGSTRIPKIQKLLQ	GGSTRIPKIQKLLQDFFNGKELNKSINPDE	L	V	G	Q	D	F	0	1	0	1	0	2	0	2	0	2	2	2	0	0	1	1	1	0	0	1	0	0	16		1752.03	P63017;P17156	P63017	337	352	Hspa8;Hspa2	Heat shock cognate 71 kDa protein;Heat shock-related 70 kDa protein 2	yes	no	3	0.020776	90.422	1	1486400	1486400
VGIKVDKGVVPLAGTDGETTTQGL	NGVPFVRTIQDKGILVGIKVDKGVVPLAGT	VPLAGTDGETTTQGLDGLLERCAQYKKDGA	L	V	G	G	L	D	1	0	0	2	0	1	1	5	0	1	2	2	0	0	1	0	4	0	0	4	0	0	24		2354.27	P05063	P05063	105	128	Aldoc	Fructose-bisphosphate aldolase C	yes	yes	3	0.007104	94.542	1	1368300	1368300
VGIKVDKGVVPLAGTDGETTTQGLDGL	NGVPFVRTIQDKGILVGIKVDKGVVPLAGT	AGTDGETTTQGLDGLLERCAQYKKDGADFA	L	V	G	G	L	L	1	0	0	3	0	1	1	6	0	1	3	2	0	0	1	0	4	0	0	4	0	0	27		2639.4	P05063	P05063	105	131	Aldoc	Fructose-bisphosphate aldolase C	yes	yes	3	4.7468e-21	264.37	1	2976800	2976800
VGIKVDKGVVPLAGTDGETTTQGLDGLL	NGVPFVRTIQDKGILVGIKVDKGVVPLAGT	GTDGETTTQGLDGLLERCAQYKKDGADFAK	L	V	G	L	L	E	1	0	0	3	0	1	1	6	0	1	4	2	0	0	1	0	4	0	0	4	0	0	28		2752.49	P05063	P05063	105	132	Aldoc	Fructose-bisphosphate aldolase C	yes	yes	3	8.1997e-09	175.83	1	1947900	1947900
VGITKAAPIL	CKLAAVLGISIFTSFVGITKAAPILFASAA	IFTSFVGITKAAPILFASAALALGSSLALK	F	V	G	I	L	F	2	0	0	0	0	0	0	1	0	2	1	1	0	0	1	0	1	0	0	1	0	0	10		981.622	Q9JIS5	Q9JIS5	708	717	Sv2a	Synaptic vesicle glycoprotein 2A	yes	yes	2	0.013582	101.9	1	1238400	1238400
VGITKVVPIL	CKFGAILGNTIFASFVGITKVVPILLAAAS	IFASFVGITKVVPILLAAASLVGGGLIALR	F	V	G	I	L	L	0	0	0	0	0	0	0	1	0	2	1	1	0	0	1	0	1	0	0	3	0	0	10		1037.68	Q8BG39	Q8BG39	649	658	Sv2b	Synaptic vesicle glycoprotein 2B	yes	yes	2	0.0041115	113.66	1	1546200	1546200
VGLDAAGKTTIL	LFSRIFGKKQMRILMVGLDAAGKTTILYKL	ILMVGLDAAGKTTILYKLKLGEIVTTIPTI	M	V	G	I	L	Y	2	0	0	1	0	0	0	2	0	1	2	1	0	0	0	0	2	0	0	1	0	0	12		1157.67	P84084;P61750;Q8BSL7;P84078;P61205	P84084	23	34	Arf5;Arf4;Arf2;Arf1;Arf3	ADP-ribosylation factor 5;ADP-ribosylation factor 4;ADP-ribosylation factor 2;ADP-ribosylation factor 1;ADP-ribosylation factor 3	yes	no	2	0.0064316	109.42	1	1826200	1826200
VGLGVSHSVL	HYFVQNHFTSARMALVGLGVSHSVLKQVAE	ARMALVGLGVSHSVLKQVAEQFLNMRGGLG	L	V	G	V	L	K	0	0	0	0	0	0	0	2	1	0	2	0	0	0	0	2	0	0	0	3	0	0	10		966.55	Q9DB77	Q9DB77	221	230	Uqcrc2	Cytochrome b-c1 complex subunit 2, mitochondrial	yes	yes	2	0.0051489	112.37	1	1789900	1789900
VGVNLPQKAGGF	VNDAFGTAHRAHSSMVGVNLPQKAGGFLMK	SSMVGVNLPQKAGGFLMKKELNYFAKALES	M	V	G	G	F	L	1	0	1	0	0	1	0	3	0	0	1	1	0	1	1	0	0	0	0	2	0	0	12		1185.65	P09411	P09411	177	188	Pgk1	Phosphoglycerate kinase 1	yes	yes	2	0.027069	81.163	1	1235400	1235400
VGYPPFWDE	PVDLWACGVILYILLVGYPPFWDEDQHRLY	ILYILLVGYPPFWDEDQHRLYQQIKAGAYD	L	V	G	D	E	D	0	0	0	1	0	0	1	1	0	0	0	0	0	1	2	0	0	1	1	1	0	0	9		1108.49	P11798;Q6PHZ2;Q923T9;P28652	P11798	208	216	Camk2a;Camk2d;Camk2g;Camk2b	Calcium/calmodulin-dependent protein kinase type II subunit alpha;Calcium/calmodulin-dependent protein kinase type II subunit delta;Calcium/calmodulin-dependent protein kinase type II subunit gamma;Calcium/calmodulin-dependent protein kinase type II subunit beta	yes	no	2	0.011046	97.071	1	328420	328420
VGYPPFWDEDQ	PVDLWACGVILYILLVGYPPFWDEDQHRLY	YILLVGYPPFWDEDQHRLYQQIKAGAYDFP	L	V	G	D	Q	H	0	0	0	2	0	1	1	1	0	0	0	0	0	1	2	0	0	1	1	1	0	0	11		1351.57	P11798;Q6PHZ2;Q923T9;P28652	P11798	208	218	Camk2a;Camk2d;Camk2g;Camk2b	Calcium/calmodulin-dependent protein kinase type II subunit alpha;Calcium/calmodulin-dependent protein kinase type II subunit delta;Calcium/calmodulin-dependent protein kinase type II subunit gamma;Calcium/calmodulin-dependent protein kinase type II subunit beta	yes	no	2	0.0021588	122.13	1	867730	867730
VHTRFQMPDQGMTSADD	TIEAHSRMVIPGGIDVHTRFQMPDQGMTSA	TRFQMPDQGMTSADDFFQGTKAALAGGTTM	D	V	H	D	D	F	1	1	0	3	0	2	0	1	1	0	0	0	2	1	1	1	2	0	0	1	0	0	17		1934.83	O08553	O08553	72	88	Dpysl2	Dihydropyrimidinase-related protein 2	yes	yes	3	0.0097572	103.13	1	3339200	3339200
VHTRFQMPDQGMTSADDF	TIEAHSRMVIPGGIDVHTRFQMPDQGMTSA	RFQMPDQGMTSADDFFQGTKAALAGGTTMI	D	V	H	D	F	F	1	1	0	3	0	2	0	1	1	0	0	0	2	2	1	1	2	0	0	1	0	0	18		2081.89	O08553	O08553	72	89	Dpysl2	Dihydropyrimidinase-related protein 2	yes	yes	3	0.00027932	136.35	1	2984000	2984000
VHWFPLF	YVLSMGAVFAIMAGFVHWFPLFSGFTLDDT	VFAIMAGFVHWFPLFSGFTLDDTWAKAHFA	F	V	H	L	F	S	0	0	0	0	0	0	0	0	1	0	1	0	0	2	1	0	0	1	0	1	0	0	7		944.491	P00397	P00397	394	400	Mtco1	Cytochrome c oxidase subunit 1	yes	yes	2	0.0064197	134.33	1	854340	854340
VIDSGIVPHLVPLL	ALSYLTDAGNEQIQMVIDSGIVPHLVPLLS	MVIDSGIVPHLVPLLSHQEVKVQTAALRAV	M	V	I	L	L	S	0	0	0	1	0	0	0	1	1	2	3	0	0	0	2	1	0	0	0	3	0	0	14		1470.88	O35343	O35343	280	293	Kpna4	Importin subunit alpha-3	yes	yes	2	0.027367	105.78	1	60806	60806
VIILNHPGQISAG	SKADPPQEAAQFTSQVIILNHPGQISAGYS	SQVIILNHPGQISAGYSPVIDCHTAHIACK	Q	V	I	A	G	Y	1	0	1	0	0	1	0	2	1	3	1	0	0	0	1	1	0	0	0	1	0	0	13		1317.74	P10126;P62631	P62631	344	356	Eef1a1;Eef1a2	Elongation factor 1-alpha 1;Elongation factor 1-alpha 2	no	no	2	4.597e-06	172.69	1	4389200	4389200
VIIWGNHSSTQYPDVNHAKVKLQGKEVGV	QIALKLGVTADDVKNVIIWGNHSSTQYPDV	VNHAKVKLQGKEVGVYEALKDDSWLKGEFI	N	V	I	G	V	Y	1	0	2	1	0	2	1	3	2	2	1	3	0	0	1	2	1	1	1	5	0	0	29		3202.69	P14152	P14152	181	209	Mdh1	Malate dehydrogenase, cytoplasmic	yes	yes	5	0.014328	83.879	1	4410600	4410600
VINGKPITIF	HGKFNGTVKAENGKLVINGKPITIFQERDP	ENGKLVINGKPITIFQERDPTNIKWGEAGA	L	V	I	I	F	Q	0	0	1	0	0	0	0	1	0	3	0	1	0	1	1	0	1	0	0	1	0	0	10		1100.66	P16858	P16858	66	75	Gapdh	Glyceraldehyde-3-phosphate dehydrogenase	yes	yes	2	0.00036332	151.44	1	30238000	30238000
VIWDPDSVKTIS	YPRKGRISVGSDADLVIWDPDSVKTISAKT	ADLVIWDPDSVKTISAKTHNSALEYNIFEG	L	V	I	I	S	A	0	0	0	2	0	0	0	0	0	2	0	1	0	0	1	2	1	1	0	2	0	0	12		1358.71	O08553	O08553	410	421	Dpysl2	Dihydropyrimidinase-related protein 2	yes	yes	2	1.3009e-05	162.36	1	4886800	4886800
VIWDPDSVKTISA	YPRKGRISVGSDADLVIWDPDSVKTISAKT	DLVIWDPDSVKTISAKTHNSALEYNIFEGM	L	V	I	S	A	K	1	0	0	2	0	0	0	0	0	2	0	1	0	0	1	2	1	1	0	2	0	0	13		1429.75	O08553	O08553	410	422	Dpysl2	Dihydropyrimidinase-related protein 2	yes	yes	2	8.0803e-06	155.97	1	6131300	6131300
VKMLPTF	EMEKGLGKDTNPTASVKMLPTFVRAIPDGS	KDTNPTASVKMLPTFVRAIPDGSENGEFLS	S	V	K	T	F	V	0	0	0	0	0	0	0	0	0	0	1	1	1	1	1	0	1	0	0	1	0	0	7		834.467	Q91W97;O08528;P17710	Q91W97	61	67	Hkdc1;Hk2;Hk1	Putative hexokinase HKDC1;Hexokinase-2;Hexokinase-1	yes	no	2	0.014038	98.503	1	431540	431540
VKTLTGKTITL	______________________________	MQIFVKTLTGKTITLEVEPSDTIENVKAKI	F	V	K	T	L	E	0	0	0	0	0	0	0	1	0	1	2	2	0	0	0	0	4	0	0	1	0	0	11		1173.73	P62984;P62983;P0CG49;P0CG50	P62984	5	15	Uba52;Rps27a;Ubb;Ubc	Ubiquitin-60S ribosomal protein L40;Ubiquitin;60S ribosomal protein L40;Ubiquitin-40S ribosomal protein S27a;Ubiquitin;40S ribosomal protein S27a;Polyubiquitin-B;Ubiquitin;Polyubiquitin-C;Ubiquitin;Ubiquitin-related 1;Ubiquitin-related 2	yes	no	2	0.035074	76.843	1	6287300	6287300
VKVGVNGF	______________________________	______________________________	M	V	K	G	F	G	0	0	1	0	0	0	0	2	0	0	0	1	0	1	0	0	0	0	0	3	0	0	8		818.465	P16858	P16858	2	9	Gapdh	Glyceraldehyde-3-phosphate dehydrogenase	yes	yes	2	0.0069731	115.46	1	9110500	9110500
VKVGVNGFGRIGRL	______________________________	MVKVGVNGFGRIGRLVTRAAICSGKVEIVA	M	V	K	R	L	V	0	2	1	0	0	0	0	4	0	1	1	1	0	1	0	0	0	0	0	3	0	0	14		1470.88	P16858	P16858	2	15	Gapdh	Glyceraldehyde-3-phosphate dehydrogenase	yes	yes	4	0.0002594	146.07	1	4055300	4055300
VKVGVNGFGRIGRLVT	______________________________	KVGVNGFGRIGRLVTRAAICSGKVEIVAIN	M	V	K	V	T	R	0	2	1	0	0	0	0	4	0	1	1	1	0	1	0	0	1	0	0	4	0	0	16		1670.99	P16858	P16858	2	17	Gapdh	Glyceraldehyde-3-phosphate dehydrogenase	yes	yes	4	0.0010086	114.31	1	1767500	1767500
VKVLQWVF	VAGGQFRVVKEPLGFVKVLQWVFAIFAFAT	VKEPLGFVKVLQWVFAIFAFATCGSYTGEL	F	V	K	V	F	A	0	0	0	0	0	1	0	0	0	0	1	1	0	1	0	0	0	1	0	3	0	0	8		1017.6	Q62277	Q62277	29	36	Syp	Synaptophysin	yes	yes	2	0.0015068	150.02	1	533990	533990
VKYGDLLPADGIL	IQIPVADITVGDIAQVKYGDLLPADGILIQ	AQVKYGDLLPADGILIQGNDLKIDESSLTG	Q	V	K	I	L	I	1	0	0	2	0	0	0	2	0	1	3	1	0	0	1	0	0	0	1	1	0	0	13		1372.76	G5E829	G5E829	218	230	Atp2b1	Plasma membrane calcium-transporting ATPase 1	yes	yes	2	0.023942	89.171	1	372450	372450
VLRDFPEL	IIYVGCGERGNEMSEVLRDFPELTMEVDGK	RGNEMSEVLRDFPELTMEVDGKVESIMKRT	E	V	L	E	L	T	0	1	0	1	0	0	1	0	0	0	2	0	0	1	1	0	0	0	0	1	0	0	8		987.539	P50516	P50516	287	294	Atp6v1a	V-type proton ATPase catalytic subunit A	yes	yes	2	0.022292	95.909	1	1043300	1043300
VLSGEDKSNIKAAWGKIGGHGAE	______________________________	NIKAAWGKIGGHGAEYGAEALERMFASFPT	M	V	L	A	E	Y	3	0	1	1	0	0	2	5	1	2	1	3	0	0	0	2	0	1	0	1	0	0	23		2323.19	P01942	P01942	2	24	Hba	Hemoglobin subunit alpha	yes	yes	3;4	7.2806e-08	178.79	2	18004000	18004000
VLSGEDKSNIKAAWGKIGGHGAEY	______________________________	IKAAWGKIGGHGAEYGAEALERMFASFPTT	M	V	L	E	Y	G	3	0	1	1	0	0	2	5	1	2	1	3	0	0	0	2	0	1	1	1	0	0	24		2486.26	P01942	P01942	2	25	Hba	Hemoglobin subunit alpha	yes	yes	3;4	0.00016351	116.7	2	4556600	4556600
VMGVNHEKYDNSL	KRVIISAPSADAPMFVMGVNHEKYDNSLKI	MFVMGVNHEKYDNSLKIVSNASCTTNCLAP	F	V	M	S	L	K	0	0	2	1	0	0	1	1	1	0	1	1	1	0	0	1	0	0	1	2	0	0	13		1504.7	P16858	P16858	130	142	Gapdh	Glyceraldehyde-3-phosphate dehydrogenase	yes	yes	2	5.3496e-09	199.03	1	8204100	8204100
VMNRPSSISWDGLDPGKL	GVTVDELGKVLTPTQVMNRPSSISWDGLDP	RPSSISWDGLDPGKLYTLVLTDPDAPSRKD	Q	V	M	K	L	Y	0	1	1	2	0	0	0	2	0	1	2	1	1	0	2	3	0	1	0	1	0	0	18		1970.99	P70296	P70296	46	63	Pebp1	Phosphatidylethanolamine-binding protein 1;Hippocampal cholinergic neurostimulating peptide	yes	yes	3	0.00044906	125.23	1	1076200	1076200
VMVDGKPVNLGL	PGEYIPTVFDNYSANVMVDGKPVNLGLWDT	SANVMVDGKPVNLGLWDTAGQEDYDRLRPL	N	V	M	G	L	W	0	0	1	1	0	0	0	2	0	0	2	1	1	0	1	0	0	0	0	3	0	0	12		1240.68	P63001;P60764	P63001	44	55	Rac1;Rac3	Ras-related C3 botulinum toxin substrate 1;Ras-related C3 botulinum toxin substrate 3	yes	no	2	0.028159	84.054	1	1592400	1592400
VNVPIPVPLPMF	TARKYAHMVDVGQVGVNVPIPVPLPMFSFT	QVGVNVPIPVPLPMFSFTGSRSSFRGDTNF	G	V	N	M	F	S	0	0	1	0	0	0	0	0	0	1	1	0	1	1	4	0	0	0	0	3	0	0	12		1321.75	Q9EQ20	Q9EQ20	471	482	Aldh6a1	Methylmalonate-semialdehyde dehydrogenase [acylating], mitochondrial	yes	yes	2	0.015877	98.392	1	120770	120770
VPFPRLHF	PGQLNADLRKLAVNMVPFPRLHFFMPGFAP	RKLAVNMVPFPRLHFFMPGFAPLTSRGSQQ	M	V	P	H	F	F	0	1	0	0	0	0	0	0	1	0	1	0	0	2	2	0	0	0	0	1	0	0	8		1011.57	P68372;P99024;Q7TMM9;Q9CWF2;Q922F4;A2AQ07;Q9D6F9;Q9ERD7	P68372	258	265	Tubb4b;Tubb5;Tubb2a;Tubb2b;Tubb6;Tubb1;Tubb4a;Tubb3	Tubulin beta-4B chain;Tubulin beta-5 chain;Tubulin beta-2A chain;Tubulin beta-2B chain;Tubulin beta-6 chain;Tubulin beta-1 chain;Tubulin beta-4A chain;Tubulin beta-3 chain	no	no	2	0.0066189	117.7	1	22216000	22216000
VPIPVPLPMF	RKYAHMVDVGQVGVNVPIPVPLPMFSFTGS	QVGVNVPIPVPLPMFSFTGSRSSFRGDTNF	N	V	P	M	F	S	0	0	0	0	0	0	0	0	0	1	1	0	1	1	4	0	0	0	0	2	0	0	10		1108.64	Q9EQ20	Q9EQ20	473	482	Aldh6a1	Methylmalonate-semialdehyde dehydrogenase [acylating], mitochondrial	yes	yes	2	0.0096035	106.84	1	736400	736400
VPPVQVSPLIKF	______________________________	______________________________	M	V	P	K	F	G	0	0	0	0	0	1	0	0	0	1	1	1	0	1	3	1	0	0	0	3	0	0	12		1322.8	Q06185	Q06185	2	13	Atp5i	ATP synthase subunit e, mitochondrial	yes	yes	2	1.4024e-05	159.83	1	1875900	1875900
VPTSSGELWILGDVFIRQYYTVFDRANNKVGLAPVA	LQDDDSCTSGFEGMDVPTSSGELWILGDVF	VFDRANNKVGLAPVA_______________	D	V	P	V	A	-	3	2	2	2	0	1	1	3	0	2	3	1	0	2	2	2	2	1	2	5	0	0	36		3995.09	P00791	P00791	350	385			yes	yes	4	0.0044661	105.48	1	337780	337780
VPYPRIHF	DGALNVDLTEFQTNLVPYPRIHFPLATYAP	TEFQTNLVPYPRIHFPLATYAPVISAEKAY	L	V	P	H	F	P	0	1	0	0	0	0	0	0	1	1	0	0	0	1	2	0	0	0	1	1	0	0	8		1027.56	P68373;P68369;P05213;P05214;Q9JJZ2;Q3UX10	P68373	260	267	Tuba1c;Tuba1a;Tuba1b;Tuba3a;Tuba8;Tubal3	Tubulin alpha-1C chain;Tubulin alpha-1A chain;Tubulin alpha-1B chain;Tubulin alpha-3 chain;Tubulin alpha-8 chain;Tubulin alpha chain-like 3	no	no	2	0.033451	82.263	1	2273400	2273400
VPYPRIHFPITAL	EGPLNVDLIEFQTNLVPYPRIHFPITALAP	NLVPYPRIHFPITALAPIISAEKAYQEQLS	L	V	P	A	L	A	1	1	0	0	0	0	0	0	1	2	1	0	0	1	3	0	1	0	1	1	0	0	13		1522.87	Q3UX10	Q3UX10	267	279	Tubal3	Tubulin alpha chain-like 3	yes	yes	3	0.039955	73.435	1	495710	495710
VPYPRIHFPLAT	DGALNVDLTEFQTNLVPYPRIHFPLATYAP	TNLVPYPRIHFPLATYAPVISAEKAYHEQL	L	V	P	A	T	Y	1	1	0	0	0	0	0	0	1	1	1	0	0	1	3	0	1	0	1	1	0	0	12		1409.78	P68373;P68369;P05213;P05214	P68373	260	271	Tuba1c;Tuba1a;Tuba1b;Tuba3a	Tubulin alpha-1C chain;Tubulin alpha-1A chain;Tubulin alpha-1B chain;Tubulin alpha-3 chain	no	no	2;3	1.4794e-05	154.85	2	88974000	88974000
VRGQKVLDSGAPIKIPVGPETL	ESTVRTIAMDGTEGLVRGQKVLDSGAPIKI	DSGAPIKIPVGPETLGRIMNVIGEPIDERG	L	V	R	T	L	G	1	1	0	1	0	1	1	3	0	2	2	2	0	0	3	1	1	0	0	3	0	0	22		2273.31	P56480	P56480	120	141	Atp5b	ATP synthase subunit beta, mitochondrial	yes	yes	3;4	0.00019488	128.05	2	3816300	3816300
VRQIFGDY	YGALLLAEGFYTTGAVRQIFGDYKTTICGK	GFYTTGAVRQIFGDYKTTICGKGLSATVTG	A	V	R	D	Y	K	0	1	0	1	0	1	0	1	0	1	0	0	0	1	0	0	0	0	1	1	0	0	8		996.503	P60202	P60202	97	104	Plp1	Myelin proteolipid protein	yes	yes	2	0.0089943	112.17	1	16663000	16663000
VSSPTWENHNAVF	GRWYNGTDNKNTPIYVSSPTWENHNAVFSA	IYVSSPTWENHNAVFSAAGFKDIRPYCYWD	Y	V	S	V	F	S	1	0	2	0	0	0	1	0	1	0	0	0	0	1	1	2	1	1	0	2	0	0	13		1486.68	P05201	P05201	136	148	Got1	Aspartate aminotransferase, cytoplasmic	yes	yes	2	0.023858	89.266	1	1916600	1916600
VTHETKHFIYF	NPTWHCIVGRNFGSYVTHETKHFIYFYLGQ	FGSYVTHETKHFIYFYLGQVAILLFKSG__	Y	V	T	Y	F	Y	0	0	0	0	0	0	1	0	2	1	0	1	0	2	0	0	2	0	1	1	0	0	11		1420.71	Q9D0M5;P63168	Q9D0M5	66	76	Dynll2;Dynll1	Dynein light chain 2, cytoplasmic;Dynein light chain 1, cytoplasmic	yes	no	2	0.027376	101.97	1	2326600	2326600
VTRNPQTARQAHL	AHQVARYRPRAPIIAVTRNPQTARQAHLYR	IAVTRNPQTARQAHLYRGIFPVLCKDAVLN	A	V	T	H	L	Y	2	2	1	0	0	2	0	0	1	0	1	0	0	0	1	0	2	0	0	1	0	0	13		1490.81	P52480	P52480	453	465	Pkm	Pyruvate kinase PKM	yes	yes	2	0.032339	79.659	1	1027400	1027400
VTSPPLSPDPTTPDF	GSHYWSKNWAKAAAFVTSPPLSPDPTTPDF	VTSPPLSPDPTTPDFLNSLLSCGDLQVTGS	F	V	T	D	F	L	0	0	0	2	0	0	0	0	0	0	1	0	0	1	5	2	3	0	0	1	0	0	15		1569.76	O08553	O08553	302	316	Dpysl2	Dihydropyrimidinase-related protein 2	yes	yes	2	0.00022892	145.89	1	4880700	4880700
VTSPPLSPDPTTPDFL	GSHYWSKNWAKAAAFVTSPPLSPDPTTPDF	TSPPLSPDPTTPDFLNSLLSCGDLQVTGSA	F	V	T	F	L	N	0	0	0	2	0	0	0	0	0	0	2	0	0	1	5	2	3	0	0	1	0	0	16		1682.84	O08553	O08553	302	317	Dpysl2	Dihydropyrimidinase-related protein 2	yes	yes	2	1.357e-06	157.66	1	1227400	1227400
VTSPPLSPDPTTPDYL	GTHYWSKNWAKAAAFVTSPPLSPDPTTPDY	TSPPLSPDPTTPDYLTSLLACGDLQVTGSG	F	V	T	Y	L	T	0	0	0	2	0	0	0	0	0	0	2	0	0	0	5	2	3	0	1	1	0	0	16		1698.84	P97427	P97427	302	317	Crmp1	Dihydropyrimidinase-related protein 1	yes	yes	2	8.6903e-07	170.99	1	1057200	1057200
VTTCLRFPGQL	TYGDLNHLVSATMSGVTTCLRFPGQLNADL	TMSGVTTCLRFPGQLNADLRKLAVNMVPFP	G	V	T	Q	L	N	0	1	0	0	1	1	0	1	0	0	2	0	0	1	1	0	2	0	0	1	0	0	11		1233.65	P68372;P99024;Q7TMM9;Q9CWF2;Q9D6F9	P68372	236	246	Tubb4b;Tubb5;Tubb2a;Tubb2b;Tubb4a	Tubulin beta-4B chain;Tubulin beta-5 chain;Tubulin beta-2A chain;Tubulin beta-2B chain;Tubulin beta-4A chain	no	no	2	0.0056918	105.2	1	169340	169340
VTTSLRFPGQL	TYGDLNHLVSATMSGVTTSLRFPGQLNADL	TMSGVTTSLRFPGQLNADLRKLAVNMVPFP	G	V	T	Q	L	N	0	1	0	0	0	1	0	1	0	0	2	0	0	1	1	1	2	0	0	1	0	0	11		1217.68	Q922F4;Q9ERD7	Q922F4	236	246	Tubb6;Tubb3	Tubulin beta-6 chain;Tubulin beta-3 chain	no	no	2	0.016071	98.257	1	1194200	1194200
VVEPYNATL	MNTFSVVPSPKVSDTVVEPYNATLSVHQLV	PKVSDTVVEPYNATLSVHQLVENTDETYCI	T	V	V	T	L	S	1	0	1	0	0	0	1	0	0	0	1	0	0	0	1	0	1	0	1	2	0	0	9		1004.52	P68372;P99024;Q7TMM9;Q9CWF2;Q922F4;Q9D6F9;Q9ERD7	P68372	179	187	Tubb4b;Tubb5;Tubb2a;Tubb2b;Tubb6;Tubb4a;Tubb3	Tubulin beta-4B chain;Tubulin beta-5 chain;Tubulin beta-2A chain;Tubulin beta-2B chain;Tubulin beta-6 chain;Tubulin beta-4A chain;Tubulin beta-3 chain	no	no	2	0.0023044	138.78	1	3684500	3684500
VVEPYNSIL	KLEFSIYPAPQVSTAVVEPYNSILTTHTTL	PQVSTAVVEPYNSILTTHTTLEHSDCAFMV	A	V	V	I	L	T	0	0	1	0	0	0	1	0	0	1	1	0	0	0	1	1	0	0	1	2	0	0	9		1032.55	P68373;P68369;P05213;P05214;Q9JJZ2	P68373	181	189	Tuba1c;Tuba1a;Tuba1b;Tuba3a;Tuba8	Tubulin alpha-1C chain;Tubulin alpha-1A chain;Tubulin alpha-1B chain;Tubulin alpha-3 chain;Tubulin alpha-8 chain	no	no	2	0.0046913	118.74	1	11309000	11309000
VVNDAGRPKVQVEYKGETKSFYPEE	DDAVVQSDMKHWPFMVVNDAGRPKVQVEYK	QVEYKGETKSFYPEEVSSMVLTKMKEIAEA	M	V	V	E	E	V	1	1	1	1	0	1	4	2	0	0	0	3	0	1	2	1	1	0	2	4	0	0	25		2868.43	P63017	P63017	94	118	Hspa8	Heat shock cognate 71 kDa protein	yes	yes	4	0.00010867	117.08	1	2042700	2042700
VVQSDMKHWPFM	VFDAKRLIGRRFDDAVVQSDMKHWPFMVVN	DDAVVQSDMKHWPFMVVNDAGRPKVQVEYK	A	V	V	F	M	V	0	0	0	1	0	1	0	0	1	0	0	1	2	1	1	1	0	1	0	2	0	0	12		1503.7	P63017	P63017	82	93	Hspa8	Heat shock cognate 71 kDa protein	yes	yes	2;3	0.0015075	126.19	2	6886000	6886000
VVVATGDRTVM	ITFFSTNCVEGTARGVVVATGDRTVMGRIA	TARGVVVATGDRTVMGRIATLASGLEVGKT	G	V	V	V	M	G	1	1	0	1	0	0	0	1	0	0	0	0	1	0	0	0	2	0	0	4	0	0	11		1146.61	Q6PIC6	Q6PIC6	247	257	Atp1a3	Sodium/potassium-transporting ATPase subunit alpha-3	yes	yes	2	0.0068117	109.44	1	5840400	5840400
VVVFGNDKL	GLKGMSLNLEPDNVGVVVFGNDKLIKEGDV	EPDNVGVVVFGNDKLIKEGDVVKRTGAIVD	G	V	V	K	L	I	0	0	1	1	0	0	0	1	0	0	1	1	0	1	0	0	0	0	0	3	0	0	9		989.555	Q03265	Q03265	116	124	Atp5a1	ATP synthase subunit alpha, mitochondrial	yes	yes	2	0.030455	83.313	1	3591300	3591300
VVVGDGAVGKTCL	______________________________	KCVVVGDGAVGKTCLLISYTTNKFPSEYVP	C	V	V	C	L	L	1	0	0	1	1	0	0	3	0	0	1	1	0	0	0	0	1	0	0	4	0	0	13		1216.65	P63001;P60764;P84096;Q05144;Q8R527;Q9ER71;P60766	P60766	7	19	Rac1;Rac3;Rhog;Rac2;Rhoq;Rhoj;Cdc42	Ras-related C3 botulinum toxin substrate 1;Ras-related C3 botulinum toxin substrate 3;Rho-related GTP-binding protein RhoG;Ras-related C3 botulinum toxin substrate 2;Rho-related GTP-binding protein RhoQ;Rho-related GTP-binding protein RhoJ;Cell division control protein 42 homolog	no	no	2	0.00019526	149.96	1	3793100	3793100
VVYPWTQRY	VNSDEVGGEALGRLLVVYPWTQRYFDSFGD	ALGRLLVVYPWTQRYFDSFGDLSSASAIMG	L	V	V	R	Y	F	0	1	0	0	0	1	0	0	0	0	0	0	0	0	1	0	1	1	2	2	0	0	9		1210.61	P02088;P02089	P02088	34	42	Hbb-b1;Hbb-b2	Hemoglobin subunit beta-1;Hemoglobin subunit beta-2	yes	no	2	0.00065985	152.59	1	18278000	18278000
VYGQMNEPPGARARVAL	SGVINLKDATSKVALVYGQMNEPPGARARV	GQMNEPPGARARVALTGLTVAEYFRDQEGQ	L	V	Y	A	L	T	3	2	1	0	0	1	1	2	0	0	1	0	1	0	2	0	0	0	1	2	0	0	17		1827.94	P56480	P56480	268	284	Atp5b	ATP synthase subunit beta, mitochondrial	yes	yes	3	0.0095534	103.39	1	4962400	4962400
VYHNLKNVIKEKYGKDATNVGDEGGFAPNIL	VGASSFREAMRIGAEVYHNLKNVIKEKYGK	ATNVGDEGGFAPNILENKEALELLKTAIAK	E	V	Y	I	L	E	2	0	4	2	0	0	2	4	1	2	2	4	0	1	1	0	1	0	2	3	0	0	31		3402.76	P17182	P17182	188	218	Eno1	Alpha-enolase	yes	yes	4;5	0.0086354	96.44	2	5691500	5691500
VYLSSNDDSGSVVL	DNLWDQGLVSQDLFSVYLSSNDDSGSVVLL	SVYLSSNDDSGSVVLLGGIDSSYYTGSLNW	S	V	Y	V	L	L	0	0	1	2	0	0	0	1	0	0	2	0	0	0	0	4	0	0	1	3	0	0	14		1453.69	P00791	P00791	212	225			yes	yes	2	0.031335	69.216	1	0	0
WARLDHKFDLM	RAVCMLSNTTAIAEAWARLDHKFDLMYAKR	IAEAWARLDHKFDLMYAKRAFVHWYVGEGM	A	W	A	L	M	Y	1	1	0	2	0	0	0	0	1	0	2	1	1	1	0	0	0	1	0	0	0	0	11		1430.71	P68373;P68369;P05213;P05214;Q9JJZ2;Q3UX10	P68373	388	398	Tuba1c;Tuba1a;Tuba1b;Tuba3a;Tuba8;Tubal3	Tubulin alpha-1C chain;Tubulin alpha-1A chain;Tubulin alpha-1B chain;Tubulin alpha-3 chain;Tubulin alpha-8 chain;Tubulin alpha chain-like 3	no	no	2;3;4	0.01501	99.539	3	13827000	13827000
WDIQKDLKDL	KDDEVAQLRKSADTLWDIQKDLKDL_____	SADTLWDIQKDLKDL_______________	L	W	D	D	L	-	0	0	0	3	0	1	0	0	0	1	2	2	0	0	0	0	0	1	0	0	0	0	10		1272.67	P16125	P16125	325	334	Ldhb	L-lactate dehydrogenase B chain	yes	yes	2;3	5.5227e-05	172.27	2	4245900	4245900
WEVISDEHGID	HLQAGQCGNQIGAKFWEVISDEHGIDPTGT	GAKFWEVISDEHGIDPTGTYHGDSDLQLER	F	W	E	I	D	P	0	0	0	2	0	0	2	1	1	2	0	0	0	0	0	1	0	1	0	1	0	0	11		1298.58	P68372;P99024;Q7TMM9;Q9CWF2;Q922F4;Q9D6F9;Q9ERD7	P68372	21	31	Tubb4b;Tubb5;Tubb2a;Tubb2b;Tubb6;Tubb4a;Tubb3	Tubulin beta-4B chain;Tubulin beta-5 chain;Tubulin beta-2A chain;Tubulin beta-2B chain;Tubulin beta-6 chain;Tubulin beta-4A chain;Tubulin beta-3 chain	no	no	2	0.0024432	117.81	1	2084500	2084500
WEVISDEHGIDPTGSY	HIQAGQCGNQIGAKFWEVISDEHGIDPTGS	EVISDEHGIDPTGSYHGDSDLQLERINVYY	F	W	E	S	Y	H	0	0	0	2	0	0	2	2	1	2	0	0	0	0	1	2	1	1	1	1	0	0	16		1803.8	Q7TMM9;Q9CWF2	Q7TMM9	21	36	Tubb2a;Tubb2b	Tubulin beta-2A chain;Tubulin beta-2B chain	yes	no	2	2.3407e-32	340.8	1	2081500	2081500
WEVISDEHGIDPTGSYHGDSDLQL	HIQAGQCGNQIGAKFWEVISDEHGIDPTGS	IDPTGSYHGDSDLQLERINVYYNEAAGNKY	F	W	E	Q	L	E	0	0	0	4	0	1	2	3	2	2	2	0	0	0	1	3	1	1	1	1	0	0	24		2669.19	Q7TMM9;Q9CWF2	Q7TMM9	21	44	Tubb2a;Tubb2b	Tubulin beta-2A chain;Tubulin beta-2B chain	yes	no	3	0.0070891	100.64	1	844710	844710
WEVISDEHGIDPTGTYHGDSD	HLQAGQCGNQIGAKFWEVISDEHGIDPTGT	EHGIDPTGTYHGDSDLQLERINVYYNEATG	F	W	E	S	D	L	0	0	0	4	0	0	2	3	2	2	0	0	0	0	1	2	2	1	1	1	0	0	21		2328.98	P68372;P99024;Q9D6F9	P68372	21	41	Tubb4b;Tubb5;Tubb4a	Tubulin beta-4B chain;Tubulin beta-5 chain;Tubulin beta-4A chain	no	no	3	1.4771e-07	176.94	1	4127700	4127700
WEVISDEHGIDPTGTYHGDSDL	HLQAGQCGNQIGAKFWEVISDEHGIDPTGT	HGIDPTGTYHGDSDLQLERINVYYNEATGG	F	W	E	D	L	Q	0	0	0	4	0	0	2	3	2	2	1	0	0	0	1	2	2	1	1	1	0	0	22		2442.06	P68372;P99024;Q9D6F9	P68372	21	42	Tubb4b;Tubb5;Tubb4a	Tubulin beta-4B chain;Tubulin beta-5 chain;Tubulin beta-4A chain	no	no	3	4.318e-12	211.16	1	3197000	3197000
WEVISDEHGIDPTGTYHGDSDLQL	HLQAGQCGNQIGAKFWEVISDEHGIDPTGT	IDPTGTYHGDSDLQLERINVYYNEATGGKY	F	W	E	Q	L	E	0	0	0	4	0	1	2	3	2	2	2	0	0	0	1	2	2	1	1	1	0	0	24		2683.2	P68372;P99024;Q9D6F9	P68372	21	44	Tubb4b;Tubb5;Tubb4a	Tubulin beta-4B chain;Tubulin beta-5 chain;Tubulin beta-4A chain	no	no	3	1.0998e-07	155.71	1	1094800	1094800
WFDNQIHE	KTGTLTQNRMTVAHMWFDNQIHEADTTEDQ	RMTVAHMWFDNQIHEADTTEDQSGTSFDKS	M	W	F	H	E	A	0	0	1	1	0	1	1	0	1	1	0	0	0	1	0	0	0	1	0	0	0	0	8		1087.47	Q6PIC6;Q6PIE5;Q8VDN2	Q6PIC6	382	389	Atp1a3;Atp1a2;Atp1a1	Sodium/potassium-transporting ATPase subunit alpha-3;Sodium/potassium-transporting ATPase subunit alpha-2;Sodium/potassium-transporting ATPase subunit alpha-1	no	no	2	4.6544e-05	154.71	1	5391700	5391700
WFDNQIHEADTTE	KTGTLTQNRMTVAHMWFDNQIHEADTTEDQ	HMWFDNQIHEADTTEDQSGTSFDKSSHTWV	M	W	F	T	E	D	1	0	1	2	0	1	2	0	1	1	0	0	0	1	0	0	2	1	0	0	0	0	13		1604.67	Q6PIC6;Q6PIE5;Q8VDN2	Q6PIC6	382	394	Atp1a3;Atp1a2;Atp1a1	Sodium/potassium-transporting ATPase subunit alpha-3;Sodium/potassium-transporting ATPase subunit alpha-2;Sodium/potassium-transporting ATPase subunit alpha-1	no	no	2	5.6899e-10	231.07	1	1946300	1946300
WILGDVF	SGFEGMDVPTSSGELWILGDVFIRQYYTVF	VPTSSGELWILGDVFIRQYYTVFDRANNKV	L	W	I	V	F	I	0	0	0	1	0	0	0	1	0	1	1	0	0	1	0	0	0	1	0	1	0	0	7		848.443	P00791;P70269;Q9D7R7;P18242;O09043	P00791	358	364	Ctse;Pgc;Ctsd;Napsa	Cathepsin E;Gastricsin;Cathepsin D;Napsin-A	yes	no	2	0.0084766	124.34	1	353260	353260
WILGDVFIRQYYTVF	SGFEGMDVPTSSGELWILGDVFIRQYYTVF	WILGDVFIRQYYTVFDRANNKVGLAPVA__	L	W	I	V	F	D	0	1	0	1	0	1	0	1	0	2	1	0	0	2	0	0	1	1	2	2	0	0	15		1919	P00791	P00791	358	372			yes	yes	2	0.025955	85.522	1	74773	74773
WILGDVFIRQYYTVFDRANNKVGLAPVA	SGFEGMDVPTSSGELWILGDVFIRQYYTVF	VFDRANNKVGLAPVA_______________	L	W	I	V	A	-	3	2	2	2	0	1	0	2	0	2	2	1	0	2	1	0	1	1	2	4	0	0	28		3224.71	P00791	P00791	358	385			yes	yes	4	0.0028548	108.44	1	428120	428120
WISKQEYDESGPSIVHRKCF	IGGSILASLSTFQQMWISKQEYDESGPSIV	EYDESGPSIVHRKCF_______________	M	W	I	C	F	-	0	1	0	1	1	1	2	1	1	2	0	2	0	1	1	3	0	1	1	1	0	0	20		2408.16	P63260;P60710	P63260	356	375	Actg1;Actb	Actin, cytoplasmic 2;Actin, cytoplasmic 2, N-terminally processed;Actin, cytoplasmic 1;Actin, cytoplasmic 1, N-terminally processed	yes	no	3;4;5	1.1202e-20	274.95	3	7873000	7873000
WKLPCIF	ANQGQIFEAYNMAALWKLPCIFICENNRYG	EAYNMAALWKLPCIFICENNRYGMGTSVER	L	W	K	I	F	I	0	0	0	0	1	0	0	0	0	1	1	1	0	1	1	0	0	1	0	0	0	0	7		905.483	P35486	P35486	214	220	Pdha1	Pyruvate dehydrogenase E1 component subunit alpha, somatic form, mitochondrial	yes	yes	2	0.0015821	166.66	1	1535800	1535800
WLHTGDIGKWLPEGTL	LKDEDRTKEALDSDGWLHTGDIGKWLPEGT	LHTGDIGKWLPEGTLKIIDRKKHIFKLAQG	G	W	L	T	L	K	0	0	0	1	0	0	1	3	1	1	3	1	0	0	1	0	2	2	0	0	0	0	16		1821.94	Q91WC3	Q91WC3	535	550	Acsl6	Long-chain-fatty-acid--CoA ligase 6	yes	yes	3	0.02236	88.507	1	402150	402150
WNEPVPRPGPNIYE	MLLSRKNQLLLEFSFWNEPVPRPGPNIYEL	FWNEPVPRPGPNIYELRSYQLRPGTMIEWG	F	W	N	Y	E	L	0	1	2	0	0	0	2	1	0	1	0	0	0	0	4	0	0	1	1	1	0	0	14		1666.81	O55126	O55126	170	183	Gbas	Protein NipSnap homolog 2	yes	yes	2	0.0016384	124.1	1	1135700	1135700
WPIAPFPRLKYPLEE	THSKAIHKIDIPSFDWPIAPFPRLKYPLEE	WPIAPFPRLKYPLEEFTTDNQQEEARCLEE	D	W	P	E	E	F	1	1	0	0	0	0	2	0	0	1	2	1	0	1	4	0	0	1	1	0	0	0	15		1855	P61922	P61922	243	257	Abat	4-aminobutyrate aminotransferase, mitochondrial	yes	yes	3	0.00083527	122.64	1	1692600	1692600
WQKIAPLSIL	VTQGIPLHMGLILLTWQKIAPLSILIQIYP	LILLTWQKIAPLSILIQIYPLLNSTIILML	T	W	Q	I	L	I	1	0	0	0	0	1	0	0	0	2	2	1	0	0	1	1	0	1	0	0	0	0	10		1167.7	P03893	P03893	133	142	Mtnd2	NADH-ubiquinone oxidoreductase chain 2	yes	yes	2	0.038229	76.478	1	189460	189460
WRDGRGAAQNIIPASTGAAKAVG	ITATQKTVDGPSGKLWRDGRGAAQNIIPAS	QNIIPASTGAAKAVGKVIPELNGKLTGMAF	L	W	R	V	G	K	6	2	1	1	0	1	0	4	0	2	0	1	0	0	1	1	1	1	0	1	0	0	23		2266.19	P16858	P16858	194	216	Gapdh	Glyceraldehyde-3-phosphate dehydrogenase	yes	yes	3	0.025335	73.459	1	1470900	1470900
WRYFAGNL	YKQIFLGGVDRHKQFWRYFAGNLASGGAAG	VDRHKQFWRYFAGNLASGGAAGATSLCFVY	F	W	R	N	L	A	1	1	1	0	0	0	0	1	0	0	1	0	0	1	0	0	0	1	1	0	0	0	8		1025.51	P48962;P51881	P48962	110	117	Slc25a4;Slc25a5	ADP/ATP translocase 1;ADP/ATP translocase 2;ADP/ATP translocase 2, N-terminally processed	no	no	2	0.017564	101.69	1	4043100	4043100
WSPWQAKVPQIE	PNVPIIDYEVSISGEWSPWQAKVPQIEVET	SGEWSPWQAKVPQIEVETHKVAAPDVVVPT	E	W	S	I	E	V	1	0	0	0	0	2	1	0	0	1	0	1	0	0	2	1	0	2	0	1	0	0	12		1467.75	Q9JHU4	Q9JHU4	2543	2554	Dync1h1	Cytoplasmic dynein 1 heavy chain 1	yes	yes	2	0.0006838	141.88	1	887840	887840
WSRVNIPKVL	SKFKPQKMREHLELFWSRVNIPKVLRAAEQ	HLELFWSRVNIPKVLRAAEQAHLWAELVFL	F	W	S	V	L	R	0	1	1	0	0	0	0	0	0	1	1	1	0	0	1	1	0	1	0	2	0	0	10		1210.72	Q68FD5	Q68FD5	1340	1349	Cltc	Clathrin heavy chain 1	yes	yes	3	0.028172	83.775	1	1380600	1380600
WTHVEMGPPDPIL	HPGLAAAASARASSWWTHVEMGPPDPILGV	SWWTHVEMGPPDPILGVTEAFKRDTNSKKM	W	W	T	I	L	G	0	0	0	1	0	0	1	1	1	1	1	0	1	0	3	0	1	1	0	1	0	0	13		1490.72	P05202	P05202	33	45	Got2	Aspartate aminotransferase, mitochondrial	yes	yes	2	2.5987e-09	217.47	1	10232000	10232000
WTYPGSLTTPPLL	ANFDPCSLLPGNLDYWTYPGSLTTPPLLEC	DYWTYPGSLTTPPLLECVTWIVLREPITVS	Y	W	T	L	L	E	0	0	0	0	0	0	0	1	0	0	3	0	0	0	3	1	3	1	1	0	0	0	13		1444.76	P00920	P00920	191	203	Ca2	Carbonic anhydrase 2	yes	yes	2	0.0011451	126.41	1	149720	149720
WVGHVFPSYQPVGPKQYPYNNL	CKHLFGFVAFMVFMFWVGHVFPSYQPVGPK	SYQPVGPKQYPYNNLYLERGGDPTKEPEPV	F	W	V	N	L	Y	0	0	2	0	0	2	0	2	1	0	1	1	0	1	4	1	0	1	3	3	0	0	22		2589.28	Q9D6J5	Q9D6J5	145	166	Ndufb8	NADH dehydrogenase [ubiquinone] 1 beta subcomplex subunit 8, mitochondrial	yes	yes	3	0.00024503	121.21	1	1021600	1021600
WVLGEHGDSSVPVWSGVN	LMGERLGVHALSCHGWVLGEHGDSSVPVWS	GEHGDSSVPVWSGVNVAGVSLKSLNPELGT	G	W	V	V	N	V	0	0	1	1	0	0	1	3	1	0	1	0	0	0	1	3	0	2	0	4	0	0	18		1923.91	P06151	P06151	188	205	Ldha	L-lactate dehydrogenase A chain	yes	yes	2	4.2411e-10	206.32	1	1350700	1350700
WVPLPMPHPLIN	FIIAPTLSLTLALSLWVPLPMPHPLINLNL	LSLWVPLPMPHPLINLNLGILFILATSSLS	L	W	V	I	N	L	0	0	1	0	0	0	0	0	1	1	2	0	1	0	4	0	0	1	0	1	0	0	12		1412.76	P03888	P03888	86	97	Mtnd1	NADH-ubiquinone oxidoreductase chain 1	yes	yes	2	0.0014826	126.67	1	999270	999270
WWNGDKYLGPAVL	ECILCACCSTSCPSYWWNGDKYLGPAVLMQ	SYWWNGDKYLGPAVLMQAYRWMIDSRDDFT	Y	W	W	V	L	M	1	0	1	1	0	0	0	2	0	0	2	1	0	0	1	0	0	2	1	1	0	0	13		1517.77	Q9CQA3	Q9CQA3	202	214	Sdhb	Succinate dehydrogenase [ubiquinone] iron-sulfur subunit, mitochondrial	yes	yes	2	8.2817e-06	155	1	1108800	1108800
WYVPLSL	NILTGTKKLTNKATLWYVPLSLKNVDKVLE	KLTNKATLWYVPLSLKNVDKVLEVPPIVYL	L	W	Y	S	L	K	0	0	0	0	0	0	0	0	0	0	2	0	0	0	1	1	0	1	1	1	0	0	7		876.475	Q91V12	Q91V12	162	168	Acot7	Cytosolic acyl coenzyme A thioester hydrolase	yes	yes	2	0.022884	101.72	1	208150	208150
YALPHAIL	DSGDGVTHTVPIYEGYALPHAILRLDLAGR	TVPIYEGYALPHAILRLDLAGRDLTDYLMK	G	Y	A	I	L	R	2	0	0	0	0	0	0	0	1	1	2	0	0	0	1	0	0	0	1	0	0	0	8		896.512	P63260;P60710;Q8BFZ3	P63260	169	176	Actg1;Actb;Actbl2	Actin, cytoplasmic 2;Actin, cytoplasmic 2, N-terminally processed;Actin, cytoplasmic 1;Actin, cytoplasmic 1, N-terminally processed;Beta-actin-like protein 2	yes	no	2	0.0032548	138.97	1	18194000	18194000
YAYGATGHPGIIPPHATL	QMSVGQRAKLIISSDYAYGATGHPGIIPPH	GATGHPGIIPPHATLVFDVELLKLE_____	D	Y	A	T	L	V	3	0	0	0	0	0	0	3	2	2	1	0	0	0	3	0	2	0	2	0	0	0	18		1834.94	P26883	P26883	81	98	Fkbp1a	Peptidyl-prolyl cis-trans isomerase FKBP1A	yes	yes	2;3	6.27e-07	129.93	2	6016900	6016900
YCLEHGIQPDGQMPSD	VGQAGVQIGNACWELYCLEHGIQPDGQMPS	CLEHGIQPDGQMPSDKTIGGGDDSFNTFFS	L	Y	C	S	D	K	0	0	0	2	1	2	1	2	1	1	1	0	1	0	2	1	0	0	1	0	0	0	16		1788.74	P68373;P68369;P05213;P05214	P68373	24	39	Tuba1c;Tuba1a;Tuba1b;Tuba3a	Tubulin alpha-1C chain;Tubulin alpha-1A chain;Tubulin alpha-1B chain;Tubulin alpha-3 chain	no	no	2	5.5051e-11	204.13	1	1989100	1989100
YCLEHGIQPDGQMPSDKTIGGGDDSF	VGQAGVQIGNACWELYCLEHGIQPDGQMPS	QMPSDKTIGGGDDSFNTFFSETGAGKHVPR	L	Y	C	S	F	N	0	0	0	4	1	2	1	5	1	2	1	1	1	1	2	2	1	0	1	0	0	0	26		2766.19	P68373;P68369;P05213;P05214	P68373	24	49	Tuba1c;Tuba1a;Tuba1b;Tuba3a	Tubulin alpha-1C chain;Tubulin alpha-1A chain;Tubulin alpha-1B chain;Tubulin alpha-3 chain	no	no	3	6.4303e-14	212.76	1	6842200	6842200
YDEEGAKIVKDLMSKAEKNGVKITL	TFLKVLNNMEIGTSLYDEEGAKIVKDLMSK	DLMSKAEKNGVKITLPVDFVTADKFDENAK	L	Y	D	T	L	P	2	0	1	2	0	0	3	2	0	2	2	5	1	0	0	1	1	0	1	2	0	0	25		2778.48	P09411	P09411	258	282	Pgk1	Phosphoglycerate kinase 1	yes	yes	4;5	6.5648e-05	131.94	2	844070	844070
YEKQLEKMRNIIPFDQM	SCAEFVSGSQLRIQEYEKQLEKMRNIIPFD	KQLEKMRNIIPFDQMTIDDLNEIFPETKLD	E	Y	E	Q	M	T	0	1	1	1	0	2	2	0	0	2	1	2	2	1	1	0	0	0	1	0	0	0	17		2182.09	Q9DCX2	Q9DCX2	115	131	Atp5h	ATP synthase subunit d, mitochondrial	yes	yes	3	0.0045153	109.72	1	2266700	2266700
YELDGRMPFPVNHGASSE	VNFHFILFNNVDGHLYELDGRMPFPVNHGA	DGRMPFPVNHGASSEDSLLQDAAKVCREFT	L	Y	E	S	E	D	1	1	1	1	0	0	2	2	1	0	1	0	1	1	2	2	0	0	1	1	0	0	18		2004.9	Q9R0P9	Q9R0P9	173	190	Uchl1	Ubiquitin carboxyl-terminal hydrolase isozyme L1	yes	yes	3	0.025639	81.788	1	4549900	4549900
YELEPEKFQNKTNGITPRRWLL	RIHSEIVKQSVFKDFYELEPEKFQNKTNGI	FQNKTNGITPRRWLLLCNPGLAEIIVERIG	F	Y	E	L	L	L	0	2	2	0	0	1	3	1	0	1	3	2	0	1	2	0	2	1	1	0	0	0	22		2731.44	Q8CI94	Q8CI94	473	494	Pygb	Glycogen phosphorylase, brain form	yes	yes	4;5	0.00019889	127.5	2	3918600	3918600
YFNSPYPKNYPPVVF	DFPDELRPAVVHGVWYFNSPYPKNYPPVVF	YFNSPYPKNYPPVVFKSRTQVVHESFQGRS	W	Y	F	V	F	K	0	0	2	0	0	0	0	0	0	0	0	1	0	2	4	1	0	0	3	2	0	0	15		1830.9	P20917	P20917	60	74	Mag	Myelin-associated glycoprotein	yes	yes	2	1.0559e-06	171.92	1	656730	656730
YGAGKAGGAFDPYTL	______________________________	YGAGKAGGAFDPYTLVRQPHTILRVVSWVF	A	Y	G	T	L	V	3	0	0	1	0	0	0	4	0	0	1	1	0	1	1	0	1	0	2	0	0	0	15		1486.71	O55100	O55100	6	20	Syngr1	Synaptogyrin-1	yes	yes	2	0.024266	79.283	1	0	0
YGFPLQYYPYY	KDKVGNIEYFGMGGYYGFPLQYYPYYGKLL	MGGYYGFPLQYYPYYGKLLQPKYLQPLLAV	Y	Y	G	Y	Y	G	0	0	0	0	0	1	0	1	0	0	1	0	0	1	2	0	0	0	5	0	0	0	11		1472.67	P14094	P14094	237	247	Atp1b1	Sodium/potassium-transporting ATPase subunit beta-1	yes	yes	2	0.00086689	141.78	1	190830	190830
YGFPLQYYPYYGKL	KDKVGNIEYFGMGGYYGFPLQYYPYYGKLL	YYGFPLQYYPYYGKLLQPKYLQPLLAVQFT	Y	Y	G	K	L	L	0	0	0	0	0	1	0	2	0	0	2	1	0	1	2	0	0	0	5	0	0	0	14		1770.87	P14094	P14094	237	250	Atp1b1	Sodium/potassium-transporting ATPase subunit beta-1	yes	yes	2	2.6561e-07	190.05	1	250450	250450
YGKGKPVPIHGSRKGGAM	SLTKKMEVKAIFTGYYGKGKPVPIHGSRKG	GKPVPIHGSRKGGAMQICTII_________	Y	Y	G	A	M	Q	1	1	0	0	0	0	0	5	1	1	0	3	1	0	2	1	0	0	1	1	0	0	18		1838.99	P16330	P16330	397	414	Cnp	2,3-cyclic-nucleotide 3-phosphodiesterase	yes	yes	3	0.026827	80.238	1	1050700	1050700
YGVLPWNA	KTSASIGSLCADARMYGVLPWNAFPGKVCG	LCADARMYGVLPWNAFPGKVCGSNLLSICK	M	Y	G	N	A	F	1	0	1	0	0	0	0	1	0	0	1	0	0	0	1	0	0	1	1	1	0	0	8		918.46	P60202	P60202	207	214	Plp1	Myelin proteolipid protein	yes	yes	2	0.0053	126.04	1	5079200	5079200
YGVLPWNAF	KTSASIGSLCADARMYGVLPWNAFPGKVCG	CADARMYGVLPWNAFPGKVCGSNLLSICKT	M	Y	G	A	F	P	1	0	1	0	0	0	0	1	0	0	1	0	0	1	1	0	0	1	1	1	0	0	9		1065.53	P60202	P60202	207	215	Plp1	Myelin proteolipid protein	yes	yes	2	0.00032998	163.41	1	10446000	10446000
YHSSLVPTHDLGGCWPPTGISPLNPLE	IVSEVFFFAGFFWAFYHSSLVPTHDLGGCW	GCWPPTGISPLNPLEVPLLNTSVLLASGVS	F	Y	H	L	E	V	0	0	1	1	1	0	1	3	2	1	4	0	0	0	5	3	2	1	1	1	0	0	27		2886.4	P00416	P00416	102	128	mt-Co3	Cytochrome c oxidase subunit 3	yes	yes	3	0.00013008	114.35	1	341740	341740
YHSSLVPTHDLGGCWPPTGISPLNPLEV	IVSEVFFFAGFFWAFYHSSLVPTHDLGGCW	CWPPTGISPLNPLEVPLLNTSVLLASGVSI	F	Y	H	E	V	P	0	0	1	1	1	0	1	3	2	1	4	0	0	0	5	3	2	1	1	2	0	0	28		2985.47	P00416	P00416	102	129	mt-Co3	Cytochrome c oxidase subunit 3	yes	yes	3	8.0233e-05	115.43	1	73547	73547
YIKKIGYNPATVPFVPISGW	YSEKRYDEIVKEVSAYIKKIGYNPATVPFV	GYNPATVPFVPISGWHGDNMLEPSPNMPWF	A	Y	I	G	W	H	1	0	1	0	0	0	0	2	0	3	0	2	0	1	3	1	1	1	2	2	0	0	20		2249.22	P62631	P62631	177	196	Eef1a2	Elongation factor 1-alpha 2	yes	yes	3	0.00015548	140.02	1	1086300	1086300
YIKKIGYNPATVPFVPISGWHGDN	YSEKRYDEIVKEVSAYIKKIGYNPATVPFV	ATVPFVPISGWHGDNMLEPSPNMPWFKGWK	A	Y	I	D	N	M	1	0	2	1	0	0	0	3	1	3	0	2	0	1	3	1	1	1	2	2	0	0	24		2672.38	P62631	P62631	177	200	Eef1a2	Elongation factor 1-alpha 2	yes	yes	4	0.0083497	98.121	1	1814600	1814600
YIVNEPPPKLPSGVF	GMDSRPPMAIFELLDYIVNEPPPKLPSGVF	YIVNEPPPKLPSGVFSLEFQDFVNKCLIKN	D	Y	I	V	F	S	0	0	1	0	0	0	1	1	0	1	1	1	0	1	4	1	0	0	1	2	0	0	15		1655.89	P31938;Q63932	P31938	316	330	Map2k1;Map2k2	Dual specificity mitogen-activated protein kinase kinase 1;Dual specificity mitogen-activated protein kinase kinase 2	yes	no	2	0.0005103	135.1	1	916580	916580
YKIIPGSRADF	LEKYHDGTKMVSADAYKIIPGSRADFSEAY	SADAYKIIPGSRADFSEAYKRLDEDLAGYC	A	Y	K	D	F	S	1	1	0	1	0	0	0	1	0	2	0	1	0	1	1	1	0	0	1	0	0	0	11		1265.68	P16330	P16330	86	96	Cnp	2,3-cyclic-nucleotide 3-phosphodiesterase	yes	yes	3	0.007646	100.04	1	7171500	7171500
YKIVPNIL	KHLPKDPMFKLVAQLYKIVPNILLEQGKAK	FKLVAQLYKIVPNILLEQGKAKNPWPNVDA	L	Y	K	I	L	L	0	0	1	0	0	0	0	0	0	2	1	1	0	0	1	0	0	0	1	1	0	0	8		958.585	Q9CZU6	Q9CZU6	381	388	Cs	Citrate synthase, mitochondrial	yes	yes	2	0.025107	92.467	1	3612600	3612600
YLDKLEPSKITKF	AIEEQVAVIYAGVRGYLDKLEPSKITKFEN	RGYLDKLEPSKITKFENAFLSHVISQHQSL	G	Y	L	K	F	E	0	0	0	1	0	0	1	0	0	1	2	3	0	1	1	1	1	0	1	0	0	0	13		1580.88	Q03265	Q03265	495	507	Atp5a1	ATP synthase subunit alpha, mitochondrial	yes	yes	3	0.0010525	128.71	1	2699300	2699300
YLENPKKYIPGTKMIF	NKNKGITWGEDTLMEYLENPKKYIPGTKMI	LENPKKYIPGTKMIFAGIKKKGERADLIAY	E	Y	L	I	F	A	0	0	1	0	0	0	1	1	0	2	1	3	1	1	2	0	1	0	2	0	0	0	16		1941.04	P62897;P00015	P62897	68	83	Cycs;Cyct	Cytochrome c, somatic;Cytochrome c, testis-specific	yes	no	4	0.017052	94.922	1	1952300	1952300
YLHLPPEIVPATL	FYWYLTNEGIQYLRDYLHLPPEIVPATLRR	RDYLHLPPEIVPATLRRSRPETGRPRPKGP	D	Y	L	T	L	R	1	0	0	0	0	0	1	0	1	1	3	0	0	0	3	0	1	0	1	1	0	0	13		1461.82	P63325	P63325	82	94	Rps10	40S ribosomal protein S10	yes	yes	2	6.5495e-06	163.32	1	437200	437200
YMVPWPLVL	IVFFIIYLFQLHMKLYMVPWPLVLLIFFVA	QLHMKLYMVPWPLVLLIFFVAATVLYITAF	L	Y	M	V	L	L	0	0	0	0	0	0	0	0	0	0	2	0	1	0	2	0	0	1	1	2	0	0	9		1116.6	Q9DCU2	Q9DCU2	96	104	Pllp	Plasmolipin	yes	yes	2	0.019106	97.306	1	238410	238410
YNGETPTEKLPFPIID	DSVEDHLAWSKDINAYNGETPTEKLPFPII	NGETPTEKLPFPIIDDKGRDLAILLGMLDP	A	Y	N	I	D	D	0	0	1	1	0	0	2	1	0	2	1	1	0	1	3	0	2	0	1	0	0	0	16		1832.92	O08709	O08709	89	104	Prdx6	Peroxiredoxin-6	yes	yes	2	1.1643e-06	162.93	1	1059700	1059700
YPLKPSWW	AFLSYCPGMDVALRMYPLKPSWWFCAFPYS	MDVALRMYPLKPSWWFCAFPYSFLIFVYDE	M	Y	P	W	W	F	0	0	0	0	0	0	0	0	0	0	1	1	0	0	2	1	0	2	1	0	0	0	8		1075.55	Q6PIC6	Q6PIC6	971	978	Atp1a3	Sodium/potassium-transporting ATPase subunit alpha-3	yes	yes	2	0.011649	108.92	1	6983900	6983900
YPLKPSWWF	AFLSYCPGMDVALRMYPLKPSWWFCAFPYS	DVALRMYPLKPSWWFCAFPYSFLIFVYDEI	M	Y	P	W	F	C	0	0	0	0	0	0	0	0	0	0	1	1	0	1	2	1	0	2	1	0	0	0	9		1222.62	Q6PIC6	Q6PIC6	971	979	Atp1a3	Sodium/potassium-transporting ATPase subunit alpha-3	yes	yes	2	0.030495	83.265	1	268000	268000
YPLKVTWW	AFLSYCPGMGVALRMYPLKVTWWFCAFPYS	MGVALRMYPLKVTWWFCAFPYSLLIFIYDE	M	Y	P	W	W	F	0	0	0	0	0	0	0	0	0	0	1	1	0	0	1	0	1	2	1	1	0	0	8		1091.58	Q6PIE5	Q6PIE5	978	985	Atp1a2	Sodium/potassium-transporting ATPase subunit alpha-2	yes	yes	2	0.0005597	166.17	1	2899700	2899700
YPYYGKLLQPKYLQPLL	EYFGMGGYYGFPLQYYPYYGKLLQPKYLQP	YYGKLLQPKYLQPLLAVQFTNLTVDTEIRV	Y	Y	P	L	L	A	0	0	0	0	0	2	0	1	0	0	5	2	0	0	3	0	0	0	4	0	0	0	17		2096.17	P14094	P14094	244	260	Atp1b1	Sodium/potassium-transporting ATPase subunit beta-1	yes	yes	3	0.002796	111.88	1	836550	836550
YQSAGGMPGGMPGGFPGGGAPPSGGASSGPTIE	QKELEKVCNPIITKLYQSAGGMPGGMPGGF	GAPPSGGASSGPTIEEVD____________	L	Y	Q	I	E	E	3	0	0	0	0	1	1	12	0	1	0	0	2	1	6	4	1	0	1	0	0	0	33		2889.27	P63017	P63017	611	643	Hspa8	Heat shock cognate 71 kDa protein	yes	yes	3	0.00095157	112.6	1	1094900	1094900
YRALTVPEL	FMPGFAPLTSRGSQQYRALTVPELTQQMFD	SRGSQQYRALTVPELTQQMFDAKNMMAACD	Q	Y	R	E	L	T	1	1	0	0	0	0	1	0	0	0	2	0	0	0	1	0	1	0	1	1	0	0	9		1060.59	P68372;P99024;Q7TMM9;Q9CWF2;Q922F4;Q9D6F9;Q9ERD7	P68372	281	289	Tubb4b;Tubb5;Tubb2a;Tubb2b;Tubb6;Tubb4a;Tubb3	Tubulin beta-4B chain;Tubulin beta-5 chain;Tubulin beta-2A chain;Tubulin beta-2B chain;Tubulin beta-6 chain;Tubulin beta-4A chain;Tubulin beta-3 chain	no	no	2	0.0061693	113.26	1	14929000	14929000
YRALTVPELTQQMF	FMPGFAPLTSRGSQQYRALTVPELTQQMFD	QYRALTVPELTQQMFDAKNMMAACDPRHGR	Q	Y	R	M	F	D	1	1	0	0	0	2	1	0	0	0	2	0	1	1	1	0	2	0	1	1	0	0	14		1695.87	P68372;Q7TMM9;Q9CWF2;Q922F4;Q9D6F9;Q9ERD7	P68372	281	294	Tubb4b;Tubb2a;Tubb2b;Tubb6;Tubb4a;Tubb3	Tubulin beta-4B chain;Tubulin beta-2A chain;Tubulin beta-2B chain;Tubulin beta-6 chain;Tubulin beta-4A chain;Tubulin beta-3 chain	no	no	2	0.0010288	120.57	1	257660	257660
YRQLFHPEQL	VDLEPTVIDEVRTGTYRQLFHPEQLITGKE	VRTGTYRQLFHPEQLITGKEDAANNYARGH	T	Y	R	Q	L	I	0	1	0	0	0	2	1	0	1	0	2	0	0	1	1	0	0	0	1	0	0	0	10		1329.68	P68373;P68369;P05213;P05214;Q9JJZ2	P68373	83	92	Tuba1c;Tuba1a;Tuba1b;Tuba3a;Tuba8	Tubulin alpha-1C chain;Tubulin alpha-1A chain;Tubulin alpha-1B chain;Tubulin alpha-3 chain;Tubulin alpha-8 chain	no	no	2	1.2836e-05	189.72	1	8225000	8225000
YRTDESQPWVL	RDDPDPRKVNLGVGAYRTDESQPWVLPVVR	GVGAYRTDESQPWVLPVVRKVEQKIANDNS	A	Y	R	V	L	P	0	1	0	1	0	1	1	0	0	0	1	0	0	0	1	1	1	1	1	1	0	0	11		1392.67	P05201	P05201	41	51	Got1	Aspartate aminotransferase, cytoplasmic	yes	yes	2	0.035455	74.849	1	1992400	1992400
YVEPLPLIF	VGSICLSMSLHFLILYVEPLPLIFQITPLN	LHFLILYVEPLPLIFQITPLNLTQWLMVLK	L	Y	V	I	F	Q	0	0	0	0	0	0	1	0	0	1	2	0	0	1	2	0	0	0	1	1	0	0	9		1089.61	O55143	O55143	948	956	Atp2a2	Sarcoplasmic/endoplasmic reticulum calcium ATPase 2	yes	yes	2	0.030308	72.234	1	0	0
YVFPKWGQGVGWL	FLFSAVQMTPLTMGSYVFPKWGQGVGWLMA	GSYVFPKWGQGVGWLMALSSMVLIPGYMAY	S	Y	V	W	L	M	0	0	0	0	0	1	0	3	0	0	1	1	0	1	1	0	0	2	1	2	0	0	13		1535.79	P31648	P31648	527	539	Slc6a1	Sodium- and chloride-dependent GABA transporter 1	yes	yes	2	0.0014772	118.18	1	146230	146230
YVYGPIPHTF	FFIGFTALVLIWEKSYVYGPIPHTFDRDWV	IWEKSYVYGPIPHTFDRDWVAMQTKRMLDM	S	Y	V	T	F	D	0	0	0	0	0	0	0	1	1	1	0	0	0	1	2	0	1	0	2	1	0	0	10		1192.59	P19783	P19783	124	133	Cox4i1	Cytochrome c oxidase subunit 4 isoform 1, mitochondrial	yes	yes	2	0.019406	94.662	1	3784500	3784500
YYAPFDGIL	NQIFGLSETEPGSFLYYAPFDGILGLAYPS	EPGSFLYYAPFDGILGLAYPSISASGATPV	L	Y	Y	I	L	G	1	0	0	1	0	0	0	1	0	1	1	0	0	1	1	0	0	0	2	0	0	0	9		1057.51	P00791	P00791	172	180			yes	yes	2	4.6413e-05	190.64	1	3250900	3250900
YYAPFDGILG	NQIFGLSETEPGSFLYYAPFDGILGLAYPS	PGSFLYYAPFDGILGLAYPSISASGATPVF	L	Y	Y	L	G	L	1	0	0	1	0	0	0	2	0	1	1	0	0	1	1	0	0	0	2	0	0	0	10		1114.53	P00791	P00791	172	181			yes	yes	2	0.001474	138.24	1	2436400	2436400
YYAPFDGILGL	NQIFGLSETEPGSFLYYAPFDGILGLAYPS	GSFLYYAPFDGILGLAYPSISASGATPVFD	L	Y	Y	G	L	A	1	0	0	1	0	0	0	2	0	1	2	0	0	1	1	0	0	0	2	0	0	0	11		1227.62	P00791	P00791	172	182			yes	yes	2	0.023489	89.298	1	67232	67232
YYAPFDGILGLAY	NQIFGLSETEPGSFLYYAPFDGILGLAYPS	FLYYAPFDGILGLAYPSISASGATPVFDNL	L	Y	Y	A	Y	P	2	0	0	1	0	0	0	2	0	1	2	0	0	1	1	0	0	0	3	0	0	0	13		1461.72	P00791	P00791	172	184			yes	yes	2	0.029385	83.005	1	66635	66635
YYNEAAGNKYVPRAIL	SYHGDSDLQLERINVYYNEAAGNKYVPRAI	YNEAAGNKYVPRAILVDLEPGTMDSVRSGP	V	Y	Y	I	L	V	3	1	2	0	0	0	1	1	0	1	1	1	0	0	1	0	0	0	3	1	0	0	16		1840.95	Q7TMM9	Q7TMM9	50	65	Tubb2a	Tubulin beta-2A chain	yes	yes	2;3	2.6062e-14	234.87	2	9937900	9937900
YYNEASSHKYVPRAIL	NYVGDSDLQLERISVYYNEASSHKYVPRAI	YNEASSHKYVPRAILVDLEPGTMDSVRSGA	V	Y	Y	I	L	V	2	1	1	0	0	0	1	0	1	1	1	1	0	0	1	2	0	0	3	1	0	0	16		1909.97	Q9ERD7	Q9ERD7	50	65	Tubb3	Tubulin beta-3 chain	yes	yes	2;3;4	1.1685e-06	201.04	3	9514700	9514700
YYNEATGGKYVPRAIL	TYHGDSDLQLDRISVYYNEATGGKYVPRAI	YNEATGGKYVPRAILVDLEPGTMDSVRSGP	V	Y	Y	I	L	V	2	1	1	0	0	0	1	2	0	1	1	1	0	0	1	0	1	0	3	1	0	0	16		1813.94	P99024	P99024	50	65	Tubb5	Tubulin beta-5 chain	yes	yes	2;3	9.1937e-12	229.75	2	11869000	11869000
YYNEATGGKYVPRAVL	TYHGDSDLQLERINVYYNEATGGKYVPRAV	YNEATGGKYVPRAVLVDLEPGTMDSVRSGP	V	Y	Y	V	L	V	2	1	1	0	0	0	1	2	0	0	1	1	0	0	1	0	1	0	3	2	0	0	16		1799.92	P68372	P68372	50	65	Tubb4b	Tubulin beta-4B chain	yes	yes	2;3	8.2363e-17	299.16	2	8361200	8361200
[truncated: 9 more columns]

## Sheet: Evidence
Sequence	Length	Modifications	Modified sequence	Oxidation (M) Probabilities	Oxidation (M) Score Diffs	Acetyl (N-term)	Oxidation (M)	Missed cleavages	Proteins	Leading proteins	Leading razor protein	Gene names	Protein names	Type	Raw file	Experiment	MS/MS m/z	Charge	m/z	Mass	Uncalibrated - Calibrated m/z [ppm]	Uncalibrated - Calibrated m/z [Da]	Mass error [ppm]	Mass error [Da]	Uncalibrated mass error [ppm]	Uncalibrated mass error [Da]	Max intensity m/z 0	Retention time	Retention length	Calibrated retention time	Calibrated retention time start	Calibrated retention time finish	Retention time calibration	Match time difference	Match m/z difference	Match q-value	Match score	Number of data points	Number of scans	Number of isotopic peaks	PIF	Fraction of total spectrum	Base peak fraction	PEP	MS/MS count	MS/MS scan number	Score	Delta score	Combinatorics
AAAPGHSAVPPPPQPQLPPLPPLPRPLSE	29	Unmodified	_AAAPGHSAVPPPPQPQLPPLPPLPRPLSE_			0	0		Q80TL0	Q80TL0	Q80TL0	Ppm1e	Protein phosphatase 1E	MULTI-MSMS	20230107_Microdroplet_Brain_BU_LongerGradient_250um	Brain_BU_LongerGradient_250um	977.211	3	976.875	2927.6	2.0217	0.0019749	-0.33951	-0.00033166	1.6821	0.0016432	977.209	23.702	1.0492	23.702	23.379	24.428	0					27	8	5	0	0	0	0.015797	1	2515	80.729	62.934	1
AADESTGSIAKRLQSIGTE	19	Unmodified	_AADESTGSIAKRLQSIGTE_			0	0		P05064	P05064	P05064	Aldoa	Fructose-bisphosphate aldolase A	MULTI-MSMS	20230107_Microdroplet_Brain_BU_LongerGradient_250um	Brain_BU_LongerGradient_250um	646.337	3	645.332	1932.98	2.6115	0.0016853	0.63032	0.00040677	3.2418	0.0020921	645.333	12.288	1.6269	12.288	11.396	13.023	0					46	14	4	0	0	0	0.00048713	2	1286	115.41	81.313	1
AAEKTKQGVTE	11	Unmodified	_AAEKTKQGVTE_			0	0		Q91ZZ3	Q91ZZ3	Q91ZZ3	Sncb	Beta-synuclein	MULTI-MSMS	20230107_Microdroplet_Brain_BU_LongerGradient_250um	Brain_BU_LongerGradient_250um	581.31	2	581.309	1160.6	1.901	0.0011051	-1.3835	-0.00080424	0.51747	0.00030081	581.81	4.6927	1.7346	4.6927	2.9859	4.7205	0					31	18	2	0	0	0	0.014803	1	380	99.788	57.501	1
AAGNKYVPRAIL	12	Unmodified	_AAGNKYVPRAIL_			0	0		Q7TMM9	Q7TMM9	Q7TMM9	Tubb2a	Tubulin beta-2A chain	MULTI-MSMS	20230107_Microdroplet_Brain_BU_LongerGradient_250um	Brain_BU_LongerGradient_250um	636.877	2	636.875	1271.74	2.5286	0.0016104	-0.32258	-0.00020545	2.206	0.001405	636.875	6.2892	1.2896	6.2892	5.6617	6.9513	0					35	14	3	0	0	0	0.0041133	1	696	133.57	89.225	1
AAKAPAPAAPAAAEPQAEAPAA	22	Unmodified	_AAKAPAPAAPAAAEPQAEAPAA_			0	0		Q91XV3	Q91XV3	Q91XV3	Basp1	Brain acid soluble protein 1	MULTI-MSMS	20230107_Microdroplet_Brain_BU_LongerGradient_250um	Brain_BU_LongerGradient_250um	971.508	2	971.505	1941	2.4312	0.0023619	3.0813	0.0029935	5.5125	0.0053554	971.508	6.2145	0.92655	6.2145	5.7429	6.6695	0					19	10	2	0	0	0	4.2197e-12	1	659	211.7	18.739	1
AAMAPPGPRVAPAPAGVF	18	Unmodified	_AAMAPPGPRVAPAPAGVF_			0	0		Q8BMF4	Q8BMF4	Q8BMF4	Dlat	Dihydrolipoyllysine-residue acetyltransferase component of pyruvate dehydrogenase complex, mitochondrial	MULTI-MSMS	20230107_Microdroplet_Brain_BU_LongerGradient_250um	Brain_BU_LongerGradient_250um	839.455	2	838.951	1675.89	1.7461	0.0014649	-0.19512	-0.00016369	1.551	0.0013012	838.95	17.031	0.94534	17.031	16.505	17.451	0					25	8	4	0	0	0	3.929e-05	1	1787	152.07	116.65	1
AAPFMRAPPGAPEKQPAPGDA	21	Unmodified	_AAPFMRAPPGAPEKQPAPGDA_			0	0		Q62277	Q62277	Q62277	Syp	Synaptophysin	MULTI-MSMS	20230107_Microdroplet_Brain_BU_LongerGradient_250um	Brain_BU_LongerGradient_250um	692.685	3	692.683	2075.03	2.0928	0.0014497	-0.52532	-0.00036388	1.5675	0.0010858	693.017	7.5992	1.8353	7.5992	6.8603	8.6956	0					53	17	4	0	0	0	0.012032	2	863	95.996	71.955	1
AAPLVPLSQQIPGGNPLY	18	Acetyl (N-term)	_(Acetyl (N-term))AAPLVPLSQQIPGGNPLY_			1	0		Q60902	Q60902	Q60902	Eps15l1	Epidermal growth factor receptor substrate 15-like 1	MULTI-MSMS	20230107_Microdroplet_Brain_BU_LongerGradient_250um	Brain_BU_LongerGradient_250um	939.514	2	939.012	1876.01	1.6958	0.0015924	-0.31918	-0.00029971	1.3766	0.0012927	939.513	26.195	0.59486	26.195	25.848	26.443	0					11	4	3	0	0	0	0.031024	1	2709	74.76	51.155	1
AARPAPAPVPSPAPPQPVQPGPPGGSRATPGPGRF	35	Unmodified	_AARPAPAPVPSPAPPQPVQPGPPGGSRATPGPGRF_			0	0		P47708	P47708	P47708	Rph3a	Rabphilin-3A	MULTI-MSMS	20230107_Microdroplet_Brain_BU_LongerGradient_250um	Brain_BU_LongerGradient_250um	835.202	4	834.948	3335.76	2.1459	0.0017917	0.57882	0.00048328	2.7247	0.002275	835.199	14.991	1.0999	14.991	14.371	15.471	0					14	10	2	0	0	0	0.0054298	1	1593	103.5	83.045	1
ADIKNNPEYSSF	12	Acetyl (N-term)	_(Acetyl (N-term))ADIKNNPEYSSF_			1	0		P63082	P63082	P63082	Atp6v0c	V-type proton ATPase 16 kDa proteolipid subunit	MULTI-MSMS	20230107_Microdroplet_Brain_BU_LongerGradient_250um	Brain_BU_LongerGradient_250um	713.83	2	713.828	1425.64	2.6952	0.0019239	-0.053729	-3.8353e-05	2.6415	0.0018856	714.329	12.449	1.1992	12.449	11.713	12.913	0					24	10	3	0	0	0	0.00056337	1	1300	144.17	85.019	1
AEFQPLVEEPKN	12	Unmodified	_AEFQPLVEEPKN_			0	0		P07724	P07724	P07724	Alb	Serum albumin	MSMS	20230107_Microdroplet_Brain_BU_LongerGradient_250um	Brain_BU_LongerGradient_250um	700.857	2	700.856	1399.7	NaN	NaN	NaN	NaN	NaN	NaN	NaN	8.1981	1	8.1981	7.6981	8.6981	0								0	0	0	1.0173e-06	1	889	143.97	88.993	1
AEIPPWVPKDRPLPPAPLSPAPAPPTPAPDPHAPAPFSWG	40	Unmodified	_AEIPPWVPKDRPLPPAPLSPAPAPPTPAPDPHAPAPFSWG_			0	0		Q9QYR6	Q9QYR6	Q9QYR6	Map1a	Microtubule-associated protein 1A;MAP1A heavy chain;MAP1 light chain LC2	MULTI-MSMS	20230107_Microdroplet_Brain_BU_LongerGradient_250um	Brain_BU_LongerGradient_250um	1036.3	4	1035.54	4138.15	2.1084	0.0021833	-0.010826	-1.1211e-05	2.0976	0.0021721	1036.05	24.756	1.5382	24.756	24.071	25.609	0					69	12	8	0	0	0	2.504e-06	2	2599	151.5	130.93	1
AEKVNNFPPLPKF	13	Acetyl (N-term)	_(Acetyl (N-term))AEKVNNFPPLPKF_			1	0		Q9JKD3	Q9JKD3	Q9JKD3	Scamp5	Secretory carrier-associated membrane protein 5	MULTI-MSMS	20230107_Microdroplet_Brain_BU_LongerGradient_250um	Brain_BU_LongerGradient_250um	771.921	2	771.919	1541.82	2.4166	0.0018654	-0.27132	-0.00020944	2.1452	0.001656	771.919	20.774	2.3946	20.774	19.693	22.087	0					61	20	4	0	0	0	1.0355e-09	1	2179	227.94	167.43	1
AELRHVMTNL	10	Unmodified	_AELRHVMTNL_			0	0		P0DP28;P0DP27;P0DP26	P0DP28	P0DP28			MULTI-MSMS	20230107_Microdroplet_Brain_BU_LongerGradient_250um	Brain_BU_LongerGradient_250um	592.318	2	592.316	1182.62	2.2467	0.0013308	1.193	0.00070664	3.4397	0.0020374	592.317	5.1397	0.78464	5.1397	4.9583	5.7429	0					17	10	2	0	0	0	0.033588	1	500	77.049	32.601	1
AENGFLPFHL	10	Unmodified	_AENGFLPFHL_			0	0		Q8VDN2	Q8VDN2	Q8VDN2	Atp1a1	Sodium/potassium-transporting ATPase subunit alpha-1	MULTI-MSMS	20230107_Microdroplet_Brain_BU_LongerGradient_250um	Brain_BU_LongerGradient_250um	572.793	2	572.793	1143.57	1.5411	0.00088275	-0.089147	-5.1063e-05	1.452	0.00083169	572.793	21.654	1.158	21.654	21.047	22.205	0					23	9	3	0	0	0	0.0015671	1	2249	137.14	91.134	1
AENGFLPFHLLG	12	Unmodified	_AENGFLPFHLLG_			0	0		Q8VDN2	Q8VDN2	Q8VDN2	Atp1a1	Sodium/potassium-transporting ATPase subunit alpha-1	MULTI-MSMS	20230107_Microdroplet_Brain_BU_LongerGradient_250um	Brain_BU_LongerGradient_250um	657.847	2	657.846	1313.68	2.5169	0.0016557	0.18227	0.00011991	2.6991	0.0017756	657.846	24.363	1.4084	24.363	23.609	25.017	0					47	11	5	0	0	0	4.3974e-06	2	2488	183.81	127.6	1
AENGFLPSRL	10	Unmodified	_AENGFLPSRL_			0	0		Q6PIE5	Q6PIE5	Q6PIE5	Atp1a2	Sodium/potassium-transporting ATPase subunit alpha-2	MULTI-MSMS	20230107_Microdroplet_Brain_BU_LongerGradient_250um	Brain_BU_LongerGradient_250um	552.298	2	552.296	1102.58	2.2845	0.0012617	-0.1332	-7.3565e-05	2.1513	0.0011881	552.296	11.453	1.4369	11.453	10.73	12.167	0					23	12	2	0	0	0	0.029391	1	1192	82.261	23.016	1
AERKFMNPFNLPNL	14	Unmodified	_AERKFMNPFNLPNL_			0	0		Q60864	Q60864	Q60864	Stip1	Stress-induced-phosphoprotein 1	MULTI-MSMS	20230107_Microdroplet_Brain_BU_LongerGradient_250um	Brain_BU_LongerGradient_250um	564.631	3	564.296	1689.87	2.2326	0.0012599	-0.16859	-9.5133e-05	2.064	0.0011647	564.63	20.919	1.3704	20.919	20.256	21.626	0					26	11	3	0	0	0	0.012797	1	2213	101.53	0.98045	1
AETDRVTGTNKGISPVPINL	20	Unmodified	_AETDRVTGTNKGISPVPINL_			0	0		P39053;P39054	P39053;P39054	P39054	Dnm1;Dnm2	Dynamin-1;Dynamin-2	MULTI-MSMS	20230107_Microdroplet_Brain_BU_LongerGradient_250um	Brain_BU_LongerGradient_250um	695.047	3	694.711	2081.11	2.214	0.0015381	0.18302	0.00012715	2.397	0.0016652	694.711	16.026	1.2577	16.026	15.359	16.616	0					33	11	4	0	0	0	1.5841e-05	1	1685	153.14	81.45	1
AFRGPFPPVWNPITY	15	Unmodified	_AFRGPFPPVWNPITY_			0	0		Q8BW75	Q8BW75	Q8BW75	Maob	Amine oxidase [flavin-containing] B	MULTI-MSMS	20230107_Microdroplet_Brain_BU_LongerGradient_250um	Brain_BU_LongerGradient_250um	881.962	2	881.459	1760.9	1.9326	0.0017035	0.39744	0.00035033	2.33	0.0020538	881.961	24.812	1.1814	24.812	24.19	25.372	0					18	9	3	0	0	0	0.00045633	1	2569	137.17	101.75	1
AGDDAPRAVF	10	Unmodified	_AGDDAPRAVF_			0	0		P63260;P60710;P63268;P68134;P68033;P62737	P63260	P63260	Actg1;Actb;Actg2;Acta1;Actc1;Acta2	Actin, cytoplasmic 2;Actin, cytoplasmic 2, N-terminally processed;Actin, cytoplasmic 1;Actin, cytoplasmic 1, N-terminally processed;Actin, gamma-enteric smooth muscle;Actin, alpha skeletal muscle;Actin, alpha cardiac muscle 1;Actin, aortic smooth muscle	MULTI-MSMS	20230107_Microdroplet_Brain_BU_LongerGradient_250um	Brain_BU_LongerGradient_250um	509.752	2	509.751	1017.49	2.1925	0.0011176	1.4273	0.00072757	3.6198	0.0018452	509.751	5.3151	1.8907	5.3151	4.7788	6.6695	0					57	24	4	0	0	0	0.034296	1	575	76.17	26.811	1
AGIENKFGLYLPKFKSPSVA	20	Unmodified	_AGIENKFGLYLPKFKSPSVA_			0	0		Q8BH59	Q8BH59	Q8BH59	Slc25a12	Calcium-binding mitochondrial carrier protein Aralar1	MULTI-MSMS	20230107_Microdroplet_Brain_BU_LongerGradient_250um	Brain_BU_LongerGradient_250um	542.806	4	542.304	2165.19	2.0787	0.0011273	-0.47264	-0.00025631	1.606	0.00087096	542.805	20.103	1.018	20.103	19.46	20.478	0					21	8	4	0	0	0	0.025456	1	2139	77.681	44.056	1
AGNPEVILPVPAF	13	Unmodified	_AGNPEVILPVPAF_			0	0		P17182	P17182	P17182	Eno1	Alpha-enolase	MULTI-MSMS	20230107_Microdroplet_Brain_BU_LongerGradient_250um	Brain_BU_LongerGradient_250um	662.371	2	662.369	1322.72	2.5574	0.0016939	-0.10134	-6.7122e-05	2.4561	0.0016268	662.369	24.291	2.8207	24.291	22.669	25.49	0					71	23	5	0	0	0	9.4352e-07	2	2487	190.24	138.38	1
AHFLPQGTPISL	12	Unmodified	_AHFLPQGTPISL_			0	0		P00848	P00848	P00848	Mtatp6	ATP synthase subunit a	MULTI-MSMS	20230107_Microdroplet_Brain_BU_LongerGradient_250um	Brain_BU_LongerGradient_250um	640.855	2	640.854	1279.69	2.4321	0.0015586	-0.081075	-5.1957e-05	2.351	0.0015067	640.853	18.075	1.2703	18.075	17.636	18.906	0					36	11	5	0	0	0	5.5407e-09	1	1949	218.47	136.49	1
AHLGVPIVT	9	Unmodified	_AHLGVPIVT_			0	0		O08599	O08599	O08599	Stxbp1	Syntaxin-binding protein 1	MULTI-MSMS	20230107_Microdroplet_Brain_BU_LongerGradient_250um	Brain_BU_LongerGradient_250um	453.774	2	453.774	905.533	2.0186	0.00091598	0.039219	1.7797e-05	2.0578	0.00093378	453.774	9.5596	1.9253	9.5596	8.5868	10.512	0					36	17	3	0	0	0	0.021245	1	993	94.669	31.955	1
AIITPWNF	8	Unmodified	_AIITPWNF_			0	0		Q8BWF0	Q8BWF0	Q8BWF0	Aldh5a1	Succinate-semialdehyde dehydrogenase, mitochondrial	MULTI-MSMS	20230107_Microdroplet_Brain_BU_LongerGradient_250um	Brain_BU_LongerGradient_250um	481.261	2	481.261	960.507	2.4799	0.0011935	-1.3531	-0.00065118	1.1269	0.00054231	481.26	22.322	1.175	22.322	22.087	23.262	0					19	9	4	0	0	0	0.0062727	1	2349	119.89	55.022	1
AIQTGVDNPGHPYIM	15	Unmodified	_AIQTGVDNPGHPYIM_			0	0		Q04447	Q04447	Q04447	Ckb	Creatine kinase B-type	MULTI-MSMS	20230107_Microdroplet_Brain_BU_LongerGradient_250um	Brain_BU_LongerGradient_250um	806.896	2	806.893	1611.77	2.3772	0.0019181	-0.28909	-0.00023327	2.0881	0.0016849	806.893	12.888	1.3684	12.888	12.39	13.759	0					42	12	4	0	0	0	8.8951e-11	2	1411	197.3	157.25	1
AIQTGVDNPGHPYIMT	16	Unmodified	_AIQTGVDNPGHPYIMT_			0	0		Q04447	Q04447	Q04447	Ckb	Creatine kinase B-type	MULTI-MSMS	20230107_Microdroplet_Brain_BU_LongerGradient_250um	Brain_BU_LongerGradient_250um	857.419	2	857.417	1712.82	2.3016	0.0019734	-0.38892	-0.00033347	1.9127	0.00164	857.417	12.822	1.4848	12.822	12.167	13.652	0					40	13	4	0	0	0	5.4842e-17	2	1337	254.4	194.3	1
AKTEWLDGKHVVF	13	Unmodified	_AKTEWLDGKHVVF_			0	0		P17742	P17742	P17742	Ppia	Peptidyl-prolyl cis-trans isomerase A;Peptidyl-prolyl cis-trans isomerase A, N-terminally processed	MULTI-MSMS	20230107_Microdroplet_Brain_BU_LongerGradient_250um	Brain_BU_LongerGradient_250um	383.459	4	383.208	1528.8	2.1098	0.00080847	-0.44841	-0.00017183	1.6613	0.00063664	383.208	8.1487	1.7635	8.1487	7.3353	9.0988	0					57	16	4	0	0	0	0.00018487	2	904	150.22	108.57	1
AKTEWLDGKHVVF	13	Unmodified	_AKTEWLDGKHVVF_			0	0		P17742	P17742	P17742	Ppia	Peptidyl-prolyl cis-trans isomerase A;Peptidyl-prolyl cis-trans isomerase A, N-terminally processed	MULTI-MSMS	20230107_Microdroplet_Brain_BU_LongerGradient_250um	Brain_BU_LongerGradient_250um	510.61	3	510.609	1528.8	2.0933	0.0010688	-0.3112	-0.0001589	1.7821	0.00090995	510.608	8.1921	2.29	8.1921	7.2358	9.5258	0					75	21	5	0	0	0	0.00053791	2	870	141.46	90.253	1
AKTEWLDGKHVVF	13	Unmodified	_AKTEWLDGKHVVF_			0	0		P17742	P17742	P17742	Ppia	Peptidyl-prolyl cis-trans isomerase A;Peptidyl-prolyl cis-trans isomerase A, N-terminally processed	MULTI-MSMS	20230107_Microdroplet_Brain_BU_LongerGradient_250um	Brain_BU_LongerGradient_250um	765.411	2	765.409	1528.8	2.2632	0.0017323	-0.3288	-0.00025167	1.9344	0.0014806	765.409	8.3184	1.7543	8.3184	7.4489	9.2031	0					40	16	4	0	0	0	0.00018293	1	895	181.31	144.79	1
AKVAVLGASGGIGQPLSLLLKNSPLVSRLTL	31	Unmodified	_AKVAVLGASGGIGQPLSLLLKNSPLVSRLTL_			0	0		P08249	P08249	P08249	Mdh2	Malate dehydrogenase, mitochondrial	MULTI-MSMS	20230107_Microdroplet_Brain_BU_LongerGradient_250um	Brain_BU_LongerGradient_250um	769.219	4	768.968	3071.84	1.8679	0.0014364	-0.34926	-0.00026857	1.5186	0.0011678	769.218	28.898	1.1028	28.898	28.7	29.803	0					25	10	4	0	0	0	0.0067474	1	2944	100.41	83.332	1
ALHVPKAPGF	10	Acetyl (N-term)	_(Acetyl (N-term))ALHVPKAPGF_			1	0		P42932	P42932	P42932	Cct8	T-complex protein 1 subunit theta	MULTI-MSMS	20230107_Microdroplet_Brain_BU_LongerGradient_250um	Brain_BU_LongerGradient_250um	539.808	2	539.806	1077.6	2.2138	0.001195	0.13979	7.546e-05	2.3536	0.0012705	539.806	15.53	1.3147	15.53	15.092	16.407	0					26	12	3	0	0	0	0.0053088	1	1660	112.17	65.104	1
ALIGDEPLENYL	12	Unmodified	_ALIGDEPLENYL_			0	0		P00791	P00791	P00791			MSMS	20230107_Microdroplet_Brain_BU_LongerGradient_250um	Brain_BU_LongerGradient_250um	673.846	2	673.846	1345.68	NaN	NaN	NaN	NaN	NaN	NaN	NaN	22.037	1	22.037	21.537	22.537	0								0	0	0	3.1487e-07	1	2311	171.33	127.02	1
ALIGDEPLENYLDTEY	16	Unmodified	_ALIGDEPLENYLDTEY_			0	0		P00791	P00791	P00791			MULTI-MSMS	20230107_Microdroplet_Brain_BU_LongerGradient_250um	Brain_BU_LongerGradient_250um	928.438	2	927.936	1853.86	1.9708	0.0018288	-0.46854	-0.00043478	1.5023	0.001394	928.436	23.644	0.57576	23.644	23.262	23.838	0					10	4	3	0	0	0	5.9477e-07	1	2468	178.49	132.08	1
ALLVPDGGKVEGGTPLF	17	Unmodified	_ALLVPDGGKVEGGTPLF_			0	0		Q9D2G2	Q9D2G2	Q9D2G2	Dlst	Dihydrolipoyllysine-residue succinyltransferase component of 2-oxoglutarate dehydrogenase complex, mitochondrial	MULTI-SECPEP	20230107_Microdroplet_Brain_BU_LongerGradient_250um	Brain_BU_LongerGradient_250um	835.878	2	835.462	1668.91	2.3031	0.0019242	0.067026	5.5998e-05	2.3701	0.0019802	835.462	20.671	0.68352	20.671	20.139	20.823	0					17	5	4	0	0	0	0.037647	1	2148	73.082	37.668	1
APIKVGDAIPSVE	13	Unmodified	_APIKVGDAIPSVE_			0	0		P99029	P99029	P99029	Prdx5	Peroxiredoxin-5, mitochondrial	MULTI-MSMS	20230107_Microdroplet_Brain_BU_LongerGradient_250um	Brain_BU_LongerGradient_250um	648.366	2	648.364	1294.71	2.2499	0.0014587	-1.4331	-0.00092916	0.81679	0.00052958	648.363	13.262	1.6549	13.262	12.606	14.261	0					41	15	4	0	0	0	0.001224	1	1380	124.46	70.699	1
APLAKVIHDNF	11	Unmodified	_APLAKVIHDNF_			0	0		P16858	P16858	P16858	Gapdh	Glyceraldehyde-3-phosphate dehydrogenase	MULTI-MSMS	20230107_Microdroplet_Brain_BU_LongerGradient_250um	Brain_BU_LongerGradient_250um	612.842	2	612.84	1223.67	2.4911	0.0015267	-0.31636	-0.00019388	2.1748	0.0013328	612.84	6.7473	1.3765	6.7473	6.0724	7.4489	0					33	14	3	0	0	0	0.0053065	1	708	136.36	96.293	1
APLAKVIHDNFG	12	Unmodified	_APLAKVIHDNFG_			0	0		P16858	P16858	P16858	Gapdh	Glyceraldehyde-3-phosphate dehydrogenase	MULTI-MSMS	20230107_Microdroplet_Brain_BU_LongerGradient_250um	Brain_BU_LongerGradient_250um	641.353	2	641.351	1280.69	2.3638	0.001516	-0.41563	-0.00026657	1.9481	0.0012494	641.351	6.8141	0.8988	6.8141	6.2385	7.1373	0					14	9	2	0	0	0	0.015993	1	746	98.257	63.433	1
ARDGPNALTPPPTTPEW	17	Unmodified	_ARDGPNALTPPPTTPEW_			0	0		Q6PIC6;Q6PIE5;Q8VDN2	Q6PIC6;Q6PIE5;Q8VDN2	Q6PIC6	Atp1a3;Atp1a2;Atp1a1	Sodium/potassium-transporting ATPase subunit alpha-3;Sodium/potassium-transporting ATPase subunit alpha-2;Sodium/potassium-transporting ATPase subunit alpha-1	MULTI-MSMS	20230107_Microdroplet_Brain_BU_LongerGradient_250um	Brain_BU_LongerGradient_250um	910.454	2	910.452	1818.89	2.1174	0.0019278	0.028402	2.5859e-05	2.1458	0.0019536	910.452	15.186	1.7274	15.186	14.473	16.2	0					59	16	5	0	0	0	5.0332e-17	2	1629	245.55	183.25	1
ARDWPDARGIWHNDNKTF	18	Unmodified	_ARDWPDARGIWHNDNKTF_			0	0		Q04447	Q04447	Q04447	Ckb	Creatine kinase B-type	MULTI-MSMS	20230107_Microdroplet_Brain_BU_LongerGradient_250um	Brain_BU_LongerGradient_250um	550.77	4	550.517	2198.04	2.43	0.0013378	-0.42687	-0.000235	2.0031	0.0011028	550.517	11.915	2.303	11.915	10.404	12.707	0					69	20	4	0	0	0	0.010624	1	1256	101.38	42.534	1
ARDWPDARGIWHNDNKTFL	19	Unmodified	_ARDWPDARGIWHNDNKTFL_			0	0		Q04447	Q04447	Q04447	Ckb	Creatine kinase B-type	MULTI-MSMS	20230107_Microdroplet_Brain_BU_LongerGradient_250um	Brain_BU_LongerGradient_250um	579.04	4	578.788	2311.12	1.826	0.0010569	0.25128	0.00014544	2.0773	0.0012023	579.039	15.812	2.1947	15.812	15.256	17.451	0					71	20	5	0	0	0	0.00037946	1	1717	124.08	40.228	1
ARDWPDARGIWHNNEKSFL	19	Unmodified	_ARDWPDARGIWHNNEKSFL_			0	0		P30275	P30275	P30275	Ckmt1	Creatine kinase U-type, mitochondrial	MULTI-MSMS	20230107_Microdroplet_Brain_BU_LongerGradient_250um	Brain_BU_LongerGradient_250um	463.233	5	463.232	2311.12	2.3684	0.0010971	-0.31987	-0.00014817	2.0485	0.00094894	463.232	15.868	1.5355	15.868	15.176	16.712	0					49	13	5	0	0	0	0.023313	1	1677	83.253	1.5298	1
ARNLIPMDPNGLSDPYVKL	19	Unmodified	_ARNLIPMDPNGLSDPYVKL_			0	0		P63318	P63318	P63318	Prkcg	Protein kinase C gamma type	MULTI-SECPEP	20230107_Microdroplet_Brain_BU_LongerGradient_250um	Brain_BU_LongerGradient_250um	705.344	3	705.042	2112.1	2.1807	0.0015375	-2.4135	-0.0017016	-0.23285	-0.00016417	705.374	21.367	0.92266	21.367	21.047	21.97	0					16	7	3	0	0	0	0.0036079	1	2240	100.21	8.5718	1
ASGATPVF	8	Unmodified	_ASGATPVF_			0	0		P00791	P00791	P00791			MULTI-MSMS	20230107_Microdroplet_Brain_BU_LongerGradient_250um	Brain_BU_LongerGradient_250um	749.383	1	749.383	748.376	2.3929	0.0017932	0.89257	0.00066888	3.2854	0.0024621	749.382	5.6222	1.9067	5.6222	5.2306	7.1373	0					42	22	3	0	0	0	0.039621	1	581	74.717	5.3337	1
ASHHPADFTPAVHASL	16	Unmodified	_ASHHPADFTPAVHASL_			0	0		P01942	P01942	P01942	Hba	Hemoglobin subunit alpha	MULTI-MSMS	20230107_Microdroplet_Brain_BU_LongerGradient_250um	Brain_BU_LongerGradient_250um	829.911	2	829.408	1656.8	2.2875	0.0018973	-0.19606	-0.00016261	2.0915	0.0017347	829.407	5.5671	0.9423	5.5671	5.3765	6.3188	0					17	11	2	0	0	0	1.2103e-06	1	614	161.67	86.16	1
ASHHPADFTPAVHASL	16	Unmodified	_ASHHPADFTPAVHASL_			0	0		P01942	P01942	P01942	Hba	Hemoglobin subunit alpha	MULTI-SECPEP	20230107_Microdroplet_Brain_BU_LongerGradient_250um	Brain_BU_LongerGradient_250um	553.796	3	553.274	1656.8	2.4178	0.0013377	0.37425	0.00020706	2.792	0.0015448	553.608	5.7975	1.2698	5.7975	5.3052	6.575	0					39	15	3	0	0	0	0.03619	1	584	73.022	45.687	1
ASLKDLEGKWRL	12	Acetyl (N-term)	_(Acetyl (N-term))ASLKDLEGKWRL_			1	0		Q05816	Q05816	Q05816	Fabp5	Fatty acid-binding protein, epidermal	MULTI-MSMS	20230107_Microdroplet_Brain_BU_LongerGradient_250um	Brain_BU_LongerGradient_250um	486.609	3	486.609	1456.8	1.3435	0.00065374	0.54504	0.00026522	1.8885	0.00091896	486.609	19.421	1.4631	19.421	18.906	20.37	0					30	12	4	0	0	0	0.00027341	1	2044	149.69	101.03	1
ASQKRPSQRSKY	12	Acetyl (N-term)	_(Acetyl (N-term))ASQKRPSQRSKY_			1	0		P04370	P04370	P04370	Mbp	Myelin basic protein	MULTI-MSMS	20230107_Microdroplet_Brain_BU_LongerGradient_250um	Brain_BU_LongerGradient_250um	493.268	3	493.267	1476.78	1.5712	0.00077502	0.94376	0.00046552	2.515	0.0012405	493.267	3.3734	1.5665	3.3734	2.3957	3.9622	0					88	26	5	0	0	0	0.025019	1	290	87.719	46.667	1
ASQKRPSQRSKY	12	Acetyl (N-term)	_(Acetyl (N-term))ASQKRPSQRSKY_			1	0		P04370	P04370	P04370	Mbp	Myelin basic protein	MULTI-MSMS	20230107_Microdroplet_Brain_BU_LongerGradient_250um	Brain_BU_LongerGradient_250um	739.4	2	739.397	1476.78	2.2511	0.0016645	0.48428	0.00035808	2.7354	0.0020225	739.397	3.4957	1.163	3.4957	2.7641	3.9271	0					35	12	4	0	0	0	0.0018915	1	330	138.36	89.938	1
ASQKRPSQRSKY	12	Acetyl (N-term)	_(Acetyl (N-term))ASQKRPSQRSKY_			1	0		P04370	P04370	P04370	Mbp	Myelin basic protein	MULTI-MSMS	20230107_Microdroplet_Brain_BU_LongerGradient_250um	Brain_BU_LongerGradient_250um	740.901	2	739.397	1476.78	2.3386	0.0017291	-0.13967	-0.00010327	2.1989	0.0016259	739.397	4.4544	0.8517	4.4544	3.9271	4.7788	0					36	9	6	0	0	0	0.00081063	2	384	162.38	97.155	1
ASQKRPSQRSKY	12	Acetyl (N-term)	_(Acetyl (N-term))ASQKRPSQRSKY_			1	0		P04370	P04370	P04370	Mbp	Myelin basic protein	MULTI-MSMS	20230107_Microdroplet_Brain_BU_LongerGradient_250um	Brain_BU_LongerGradient_250um	493.268	3	493.267	1476.78	1.677	0.00082719	-0.82305	-0.00040598	0.85391	0.00042121	493.266	4.7672	1.1028	4.7672	3.9271	5.0299	0					29	13	3	0	0	0	0.033649	1	408	77.644	32.211	1
ASQKRPSQRSKYLAT	15	Acetyl (N-term)	_(Acetyl (N-term))ASQKRPSQRSKYLAT_			1	0		P04370	P04370	P04370	Mbp	Myelin basic protein	MULTI-MSMS	20230107_Microdroplet_Brain_BU_LongerGradient_250um	Brain_BU_LongerGradient_250um	881.983	2	881.982	1761.95	1.8881	0.0016653	0.029769	2.6256e-05	1.9179	0.0016915	881.982	4.7062	0.81653	4.7062	3.9622	4.7788	0					25	8	4	0	0	0	0.034357	1	382	97.734	56.334	1
ASTMDHARHGFLPRHRDTGIL	21	Unmodified	_ASTMDHARHGFLPRHRDTGIL_			0	0		P04370	P04370	P04370	Mbp	Myelin basic protein	MULTI-MSMS	20230107_Microdroplet_Brain_BU_LongerGradient_250um	Brain_BU_LongerGradient_250um	598.06	4	597.808	2387.2	2.2472	0.0013434	-0.34821	-0.00020816	1.899	0.0011352	598.058	4.8135	1.72	4.8135	4.5185	6.2385	0					53	22	5	0	0	0	0.036341	1	434	71.535	53.239	1
ASTMDHARHGFLPRHRDTGIL	21	Unmodified	_ASTMDHARHGFLPRHRDTGIL_			0	0		P04370	P04370	P04370	Mbp	Myelin basic protein	MULTI-MSMS	20230107_Microdroplet_Brain_BU_LongerGradient_250um	Brain_BU_LongerGradient_250um	797.077	3	796.742	2387.2	2.2677	0.0018068	-0.60489	-0.00048194	1.6628	0.0013248	797.409	4.8141	0.51135	4.8141	4.5185	5.0299	0					26	6	5	0	0	0	0.020628	1	439	82.406	49.481	1
ASVEPDPEKIPSFPPDLGF	19	Unmodified	_ASVEPDPEKIPSFPPDLGF_			0	0		Q9CR61	Q9CR61	Q9CR61	Ndufb7	NADH dehydrogenase [ubiquinone] 1 beta subcomplex subunit 7	MULTI-MSMS	20230107_Microdroplet_Brain_BU_LongerGradient_250um	Brain_BU_LongerGradient_250um	1021.51	2	1021.51	2041	1.998	0.002041	-0.35764	-0.00036533	1.6404	0.0016757	1022.01	23.712	1.6343	23.712	23.145	24.779	0					30	13	3	0	0	0	0.0002557	1	2480	134.04	99.037	1
ATAQHDPALQPLL	13	Unmodified	_ATAQHDPALQPLL_			0	0		P00920	P00920	P00920	Ca2	Carbonic anhydrase 2	MULTI-MSMS	20230107_Microdroplet_Brain_BU_LongerGradient_250um	Brain_BU_LongerGradient_250um	687.872	2	687.872	1373.73	2.3086	0.001588	-0.61016	-0.00041971	1.6984	0.0011683	687.87	11.472	1.1066	11.472	11.169	12.276	0					19	9	3	0	0	0	0.035443	1	1228	76.143	8.5799	1
ATNVGDEGGFAPNIL	15	Unmodified	_ATNVGDEGGFAPNIL_			0	0		P17182;P21550;P17183	P17182;P17183	P17182	Eno1;Eno3;Eno2	Alpha-enolase;Beta-enolase;Gamma-enolase	MULTI-MSMS	20230107_Microdroplet_Brain_BU_LongerGradient_250um	Brain_BU_LongerGradient_250um	737.864	2	737.862	1473.71	2.5106	0.0018525	-0.073545	-5.4266e-05	2.4371	0.0017982	737.862	17.833	1.1535	17.833	17.124	18.278	0					22	10	3	0	0	0	0.026058	1	1879	85.402	57.781	1
ATQKTVDGPSGKL	13	Unmodified	_ATQKTVDGPSGKL_			0	0		P16858	P16858	P16858	Gapdh	Glyceraldehyde-3-phosphate dehydrogenase	MSMS	20230107_Microdroplet_Brain_BU_LongerGradient_250um	Brain_BU_LongerGradient_250um	651.359	2	651.357	1300.7	NaN	NaN	NaN	NaN	NaN	NaN	NaN	4.7653	1	4.7653	4.2653	5.2653	0								0	0	0	4.1568e-05	1	443	141.13	82.428	1
ATSAASPGPERRPPPAQAPAPQPAPQPAPTPSVG	34	Unmodified	_ATSAASPGPERRPPPAQAPAPQPAPQPAPTPSVG_			0	0		Q64332	Q64332	Q64332	Syn2	Synapsin-2	MULTI-MSMS	20230107_Microdroplet_Brain_BU_LongerGradient_250um	Brain_BU_LongerGradient_250um	1085.57	3	1085.23	3252.66	2.0058	0.0021767	1.2499	0.0013565	3.2557	0.0035332	1085.56	10.405	1.7577	10.405	9.5258	11.283	0					44	15	4	0	0	0	6.0254e-15	1	1098	214.44	174.65	1
ATSAASPGPERRPPPAQAPAPQPAPQPAPTPSVG	34	Unmodified	_ATSAASPGPERRPPPAQAPAPQPAPQPAPTPSVG_			0	0		Q64332	Q64332	Q64332	Syn2	Synapsin-2	MULTI-MSMS	20230107_Microdroplet_Brain_BU_LongerGradient_250um	Brain_BU_LongerGradient_250um	814.425	4	814.173	3252.66	2.2041	0.0017946	0.082398	6.7086e-05	2.2865	0.0018616	814.424	10.358	1.9761	10.358	9.5258	11.502	0					41	17	4	0	0	0	0.013584	1	1099	86.785	59.642	1
ATTHSKAIHKIDIPSFDWPIAPF	23	Unmodified	_ATTHSKAIHKIDIPSFDWPIAPF_			0	0		P61922	P61922	P61922	Abat	4-aminobutyrate aminotransferase, mitochondrial	MULTI-MSMS	20230107_Microdroplet_Brain_BU_LongerGradient_250um	Brain_BU_LongerGradient_250um	649.098	4	648.846	2591.35	2.2098	0.0014338	0.04396	2.8524e-05	2.2538	0.0014624	649.347	23.416	1.2833	23.416	22.907	24.19	0					29	10	5	0	0	0	0.018523	1	2437	80.752	52.805	1
ATTHSKAIHKIDIPSFDWPIAPFPRLKYPLEE	32	Unmodified	_ATTHSKAIHKIDIPSFDWPIAPFPRLKYPLEE_			0	0		P61922	P61922	P61922	Abat	4-aminobutyrate aminotransferase, mitochondrial	MULTI-MSMS	20230107_Microdroplet_Brain_BU_LongerGradient_250um	Brain_BU_LongerGradient_250um	620.671	6	620.503	3716.97	2.4801	0.0015389	0.13868	8.6054e-05	2.6187	0.0016249	620.67	24.405	1.298	24.405	23.719	25.017	0					33	10	5	0	0	0	0.043121	1	2532	69.201	53.278	1
ATVPPAAPAGEGGPPAPPPNL	21	Unmodified	_ATVPPAAPAGEGGPPAPPPNL_			0	0		P63044	P63044	P63044	Vamp2	Vesicle-associated membrane protein 2	MULTI-MSMS	20230107_Microdroplet_Brain_BU_LongerGradient_250um	Brain_BU_LongerGradient_250um	939.492	2	939.491	1876.97	2.2552	0.0021187	-0.37199	-0.00034948	1.8832	0.0017692	939.491	15.551	1.7165	15.551	14.995	16.712	0					37	16	3	0	0	0	0.00025634	1	1649	125.97	82.431	1
ATVPPAAPAGEGGPPAPPPNL	21	Unmodified	_ATVPPAAPAGEGGPPAPPPNL_			0	0		P63044	P63044	P63044	Vamp2	Vesicle-associated membrane protein 2	MULTI-MSMS	20230107_Microdroplet_Brain_BU_LongerGradient_250um	Brain_BU_LongerGradient_250um	626.999	3	626.663	1876.97	2.3327	0.0014618	0.0024488	1.5345e-06	2.3351	0.0014633	626.663	15.53	2.0295	15.53	14.78	16.809	0					48	19	4	0	0	0	0.00011431	1	1700	120.71	91.437	1
AVAAQGKVKK	10	Unmodified	_AVAAQGKVKK_			0	0		Q9DBJ1	Q9DBJ1	Q9DBJ1	Pgam1	Phosphoglycerate mutase 1	MULTI-MSMS	20230107_Microdroplet_Brain_BU_LongerGradient_250um	Brain_BU_LongerGradient_250um	500.32	2	500.319	998.624	1.8025	0.00090182	0.61762	0.000309	2.4201	0.0012108	500.319	4.3853	1.5693	4.3853	3.0657	4.635	0					30	16	2	0	0	0	0.0022124	2	321	129.47	50.35	1
AVRQIFGDY	9	Unmodified	_AVRQIFGDY_			0	0		P60202	P60202	P60202	Plp1	Myelin proteolipid protein	MULTI-MSMS	20230107_Microdroplet_Brain_BU_LongerGradient_250um	Brain_BU_LongerGradient_250um	534.778	2	534.777	1067.54	1.8833	0.0010072	0.12661	6.7709e-05	2.0099	0.0010749	534.777	7.2284	1.7871	7.2284	6.4841	8.2712	0					44	17	3	0	0	0	0.0014888	1	761	145.63	86.428	1
AVVEPYNSIL	10	Unmodified	_AVVEPYNSIL_			0	0		P68373;P68369;P05213;P05214;Q9JJZ2	P68373	P68373	Tuba1c;Tuba1a;Tuba1b;Tuba3a;Tuba8	Tubulin alpha-1C chain;Tubulin alpha-1A chain;Tubulin alpha-1B chain;Tubulin alpha-3 chain;Tubulin alpha-8 chain	MULTI-MSMS	20230107_Microdroplet_Brain_BU_LongerGradient_250um	Brain_BU_LongerGradient_250um	552.802	2	552.8	1103.59	1.9538	0.0010801	0.17871	9.8792e-05	2.1326	0.0011789	552.8	16.676	1.6766	16.676	15.774	17.451	0					35	15	4	0	0	0	0.025368	2	1748	87.258	22.07	1
AWINTPKKQGGLGPMNIPLISD	22	Unmodified	_AWINTPKKQGGLGPMNIPLISD_			0	0		P35700	P35700	P35700	Prdx1	Peroxiredoxin-1	MULTI-MSMS	20230107_Microdroplet_Brain_BU_LongerGradient_250um	Brain_BU_LongerGradient_250um	784.427	3	784.091	2349.25	2.297	0.0018011	-0.13951	-0.00010939	2.1575	0.0016917	784.425	22.059	0.81264	22.059	21.626	22.439	0					23	6	4	0	0	0	0.00028746	1	2315	115.42	36.757	1
AWINTPRKEGGLGPLNIPLL	20	Unmodified	_AWINTPRKEGGLGPLNIPLL_			0	0		Q61171	Q61171	Q61171	Prdx2	Peroxiredoxin-2	MULTI-MSMS	20230107_Microdroplet_Brain_BU_LongerGradient_250um	Brain_BU_LongerGradient_250um	720.751	3	720.416	2158.23	2.0827	0.0015004	-0.33478	-0.00024118	1.7479	0.0012592	720.75	25.431	1.6639	25.431	24.779	26.443	0					55	13	6	0	0	0	5.2112e-05	1	2589	149.73	95.904	1
CDKPWVF	7	Unmodified	_CDKPWVF_			0	0		O88935;Q64332	O88935;Q64332	O88935	Syn1;Syn2	Synapsin-1;Synapsin-2	MULTI-MSMS	20230107_Microdroplet_Brain_BU_LongerGradient_250um	Brain_BU_LongerGradient_250um	447.714	2	447.713	893.411	2.0097	0.00089978	0.17215	7.7075e-05	2.1819	0.00097686	447.713	10.348	1.8703	10.348	9.5258	11.396	0					40	16	3	0	0	0	0.027407	1	1102	97.071	58.869	1
CRIGFGPSPFSL	12	Unmodified	_CRIGFGPSPFSL_			0	0		P19246	P19246	P19246	Nefh	Neurofilament heavy polypeptide	MULTI-SECPEP	20230107_Microdroplet_Brain_BU_LongerGradient_250um	Brain_BU_LongerGradient_250um	641.85	2	640.826	1279.64	2.3883	0.0015305	-0.67485	-0.00043246	1.7134	0.001098	640.827	20.972	0.92104	20.972	20.591	21.512	0					9	7	2	0	0	0	0.0043019	1	2210	109.66	50.683	1
CRQLFGGF	8	Unmodified	_CRQLFGGF_			0	0		Q6PIC6;Q9WV27;Q6PIE5;Q8VDN2	Q6PIC6;Q6PIE5;Q8VDN2	Q6PIC6	Atp1a3;Atp1a4;Atp1a2;Atp1a1	Sodium/potassium-transporting ATPase subunit alpha-3;Sodium/potassium-transporting ATPase subunit alpha-4;Sodium/potassium-transporting ATPase subunit alpha-2;Sodium/potassium-transporting ATPase subunit alpha-1	MULTI-MSMS	20230107_Microdroplet_Brain_BU_LongerGradient_250um	Brain_BU_LongerGradient_250um	464.23	2	464.229	926.443	2.4887	0.0011553	-0.040156	-1.8642e-05	2.4486	0.0011367	464.229	10.134	1.8585	10.134	9.311	11.169	0					46	16	4	0	0	0	0.012614	2	1101	107.74	45.029	1
DAIQTGVDNPGHPYIM	16	Unmodified	_DAIQTGVDNPGHPYIM_			0	0		Q04447	Q04447	Q04447	Ckb	Creatine kinase B-type	MULTI-MSMS	20230107_Microdroplet_Brain_BU_LongerGradient_250um	Brain_BU_LongerGradient_250um	864.407	2	864.407	1726.8	1.865	0.0016121	0.35437	0.00030632	2.2194	0.0019184	864.406	14.7	0.9367	14.7	14.155	15.092	0					20	8	3	0	0	0	8.7788e-24	1	1561	290.66	231.31	1
DDEPLGRVSF	10	Unmodified	_DDEPLGRVSF_			0	0		P17742	P17742	P17742	Ppia	Peptidyl-prolyl cis-trans isomerase A;Peptidyl-prolyl cis-trans isomerase A, N-terminally processed	MULTI-MSMS	20230107_Microdroplet_Brain_BU_LongerGradient_250um	Brain_BU_LongerGradient_250um	567.776	2	567.775	1133.54	2.0511	0.0011646	-0.22796	-0.00012943	1.8231	0.0010351	567.775	11.462	1.983	11.462	10.623	12.606	0					42	17	3	0	0	0	6.4844e-07	1	1211	195.17	138.13	1
DDIKKVVKQASEGPLKGIL	19	Unmodified	_DDIKKVVKQASEGPLKGIL_			0	0		P16858	P16858	P16858	Gapdh	Glyceraldehyde-3-phosphate dehydrogenase	MULTI-MSMS	20230107_Microdroplet_Brain_BU_LongerGradient_250um	Brain_BU_LongerGradient_250um	510.555	4	510.303	2037.18	1.7797	0.00090816	-0.022014	-1.1234e-05	1.7576	0.00089693	510.554	17	1.3514	17	16.505	17.857	0					35	12	4	0	0	0	0.017216	1	1810	91.589	52.446	1
DGTEGLVRGQKVLDSGAPIKIPVGPETL	28	Unmodified	_DGTEGLVRGQKVLDSGAPIKIPVGPETL_			0	0		P56480	P56480	P56480	Atp5b	ATP synthase subunit beta, mitochondrial	MULTI-MSMS	20230107_Microdroplet_Brain_BU_LongerGradient_250um	Brain_BU_LongerGradient_250um	949.861	3	949.526	2845.55	2.0594	0.0019554	-0.32614	-0.00030968	1.7332	0.0016457	949.86	21.401	0.8082	21.401	21.047	21.855	0					23	6	5	0	0	0	1.2153e-20	1	2243	242.94	213.67	1
DGTEGLVRGQKVLDSGAPIKIPVGPETL	28	Unmodified	_DGTEGLVRGQKVLDSGAPIKIPVGPETL_			0	0		P56480	P56480	P56480	Atp5b	ATP synthase subunit beta, mitochondrial	MULTI-MSMS	20230107_Microdroplet_Brain_BU_LongerGradient_250um	Brain_BU_LongerGradient_250um	712.648	4	712.396	2845.55	2.1654	0.0015426	-0.10569	-7.529e-05	2.0597	0.0014673	712.647	21.525	0.92266	21.525	21.047	21.97	0					33	7	5	0	0	0	2.2653e-05	1	2269	143.54	114.07	1
DHKFDLM	7	Unmodified	_DHKFDLM_			0	0		P68373;P68369;P05213;P05214;Q9JJZ2;Q3UX10	P68373;Q3UX10	P68373	Tuba1c;Tuba1a;Tuba1b;Tuba3a;Tuba8;Tubal3	Tubulin alpha-1C chain;Tubulin alpha-1A chain;Tubulin alpha-1B chain;Tubulin alpha-3 chain;Tubulin alpha-8 chain;Tubulin alpha chain-like 3	MULTI-MSMS	20230107_Microdroplet_Brain_BU_LongerGradient_250um	Brain_BU_LongerGradient_250um	453.213	2	453.213	904.411	2.207	0.0010002	-0.26044	-0.00011804	1.9466	0.0008822	453.213	5.6024	1.436	5.6024	4.9583	6.3943	0					40	18	3	0	0	0	0.020761	1	595	103.91	43.259	1
DLGPPVNVPQVSSM	14	Unmodified	_DLGPPVNVPQVSSM_			0	0		Q9DBG3	Q9DBG3	Q9DBG3	Ap2b1	AP-2 complex subunit beta	MULTI-MSMS	20230107_Microdroplet_Brain_BU_LongerGradient_250um	Brain_BU_LongerGradient_250um	720.365	2	720.364	1438.71	1.7683	0.0012738	0.43683	0.00031467	2.2051	0.0015885	720.364	19.517	0.89715	19.517	18.906	19.804	0					14	7	2	0	0	0	0.035406	1	2060	76.326	41.571	1
DLLRPDVVL	9	Unmodified	_DLLRPDVVL_			0	0		Q68FD5	Q68FD5	Q68FD5	Cltc	Clathrin heavy chain 1	MSMS	20230107_Microdroplet_Brain_BU_LongerGradient_250um	Brain_BU_LongerGradient_250um	520.312	2	520.311	1038.61	NaN	NaN	NaN	NaN	NaN	NaN	NaN	17.615	1	17.615	17.115	18.115	0								0	0	0	0.041803	1	1874	60.019	10.429	1
DRANNKVGLAPVA	13	Unmodified	_DRANNKVGLAPVA_			0	0		P00791	P00791	P00791			MULTI-MSMS	20230107_Microdroplet_Brain_BU_LongerGradient_250um	Brain_BU_LongerGradient_250um	662.872	2	662.87	1323.73	2.5127	0.0016656	-0.43241	-0.00028663	2.0803	0.001379	662.87	4.9959	0.73414	4.9959	4.7205	5.4547	0					27	10	3	0	0	0	0.016383	2	532	97.734	47.176	1
DRGFDPSSPVL	11	Unmodified	_DRGFDPSSPVL_			0	0		O08599	O08599	O08599	Stxbp1	Syntaxin-binding protein 1	MULTI-MSMS	20230107_Microdroplet_Brain_BU_LongerGradient_250um	Brain_BU_LongerGradient_250um	595.297	2	595.296	1188.58	2.1962	0.0013074	-0.69089	-0.00041128	1.5053	0.00089611	595.296	10.783	1.4252	10.783	9.9709	11.396	0					31	12	3	0	0	0	0.026489	1	1179	85.676	48.117	1
DRIRKLADQCTGL	13	Unmodified	_DRIRKLADQCTGL_			0	0		P68373;P68369;P05213	P68373	P68373	Tuba1c;Tuba1a;Tuba1b	Tubulin alpha-1C chain;Tubulin alpha-1A chain;Tubulin alpha-1B chain	MULTI-MSMS	20230107_Microdroplet_Brain_BU_LongerGradient_250um	Brain_BU_LongerGradient_250um	744.903	2	744.901	1487.79	2.4511	0.0018258	0.49329	0.00036745	2.9444	0.0021933	744.901	5.7099	1.1637	5.7099	5.2306	6.3943	0					28	14	3	0	0	0	0.023645	1	586	110.08	51.401	1
DSGAPIKIPVGPETL	15	Unmodified	_DSGAPIKIPVGPETL_			0	0		P56480	P56480	P56480	Atp5b	ATP synthase subunit beta, mitochondrial	MULTI-MSMS	20230107_Microdroplet_Brain_BU_LongerGradient_250um	Brain_BU_LongerGradient_250um	747.917	2	747.414	1492.81	1.7299	0.0012929	0.78396	0.00058594	2.5138	0.0018789	747.415	19.697	1.1302	19.697	19.126	20.256	0					15	9	2	0	0	0	6.709e-07	1	2088	180.24	144.83	1
DSGDGVTHTVPIYE	14	Unmodified	_DSGDGVTHTVPIYE_			0	0		P63260;P60710;Q8BFZ3	P63260	P63260	Actg1;Actb;Actbl2	Actin, cytoplasmic 2;Actin, cytoplasmic 2, N-terminally processed;Actin, cytoplasmic 1;Actin, cytoplasmic 1, N-terminally processed;Beta-actin-like protein 2	MULTI-MSMS	20230107_Microdroplet_Brain_BU_LongerGradient_250um	Brain_BU_LongerGradient_250um	745.347	2	745.344	1488.67	2.2283	0.0016609	0.33444	0.00024928	2.5628	0.0019101	745.344	8.9022	1.5673	8.9022	8.0697	9.637	0					22	14	2	0	0	0	0.002771	1	955	112.71	65.82	1
DSGDGVTHTVPIYEG	15	Unmodified	_DSGDGVTHTVPIYEG_			0	0		P63260;P60710;Q8BFZ3	P63260	P63260	Actg1;Actb;Actbl2	Actin, cytoplasmic 2;Actin, cytoplasmic 2, N-terminally processed;Actin, cytoplasmic 1;Actin, cytoplasmic 1, N-terminally processed;Beta-actin-like protein 2	MULTI-MSMS	20230107_Microdroplet_Brain_BU_LongerGradient_250um	Brain_BU_LongerGradient_250um	773.856	2	773.855	1545.69	2.3406	0.0018113	-0.68579	-0.0005307	1.6548	0.0012806	773.854	8.8985	2.4169	8.8985	7.554	9.9709	0					67	22	5	0	0	0	1.8464e-06	2	915	154.84	103.08	1
DSVRSGPFGQL	11	Unmodified	_DSVRSGPFGQL_			0	0		Q922F4	Q922F4	Q922F4	Tubb6	Tubulin beta-6 chain	MULTI-MSMS	20230107_Microdroplet_Brain_BU_LongerGradient_250um	Brain_BU_LongerGradient_250um	581.797	2	581.796	1161.58	1.8485	0.0010754	-1.3276	-0.00077242	0.52085	0.00030303	581.795	7.8604	2.2318	7.8604	6.7665	8.9983	0					47	21	3	0	0	0	0.019023	1	841	94.692	0	1
DSVRSGPFGQLF	12	Unmodified	_DSVRSGPFGQLF_			0	0		Q922F4	Q922F4	Q922F4	Tubb6	Tubulin beta-6 chain	MULTI-MSMS	20230107_Microdroplet_Brain_BU_LongerGradient_250um	Brain_BU_LongerGradient_250um	655.332	2	655.33	1308.65	2.0487	0.0013425	0.048171	3.1568e-05	2.0968	0.0013741	655.33	16.702	1.9811	16.702	16.089	18.07	0					54	18	4	0	0	0	0.00047184	1	1772	145.91	0	1
DSVRSGPFGQLFRPDN	16	Unmodified	_DSVRSGPFGQLFRPDN_			0	0		Q922F4	Q922F4	Q922F4	Tubb6	Tubulin beta-6 chain	MULTI-MSMS	20230107_Microdroplet_Brain_BU_LongerGradient_250um	Brain_BU_LongerGradient_250um	598.3	3	597.964	1790.87	1.8323	0.0010956	0.31917	0.00019085	2.1515	0.0012865	598.299	14.165	1.9179	14.165	13.338	15.256	0					52	18	4	0	0	0	4.4849e-11	2	1519	163.51	0	1
DSVRSGPFGQLFRPDN	16	Unmodified	_DSVRSGPFGQLFRPDN_			0	0		Q922F4	Q922F4	Q922F4	Tubb6	Tubulin beta-6 chain	MULTI-MSMS	20230107_Microdroplet_Brain_BU_LongerGradient_250um	Brain_BU_LongerGradient_250um	896.444	2	896.442	1790.87	1.5263	0.0013683	-0.1891	-0.00016951	1.3372	0.0011987	896.943	14.137	1.3458	14.137	13.548	14.893	0					37	12	4	0	0	0	1.0033e-16	1	1478	237.3	0	1
DSVRSGPFGQLFRPDNF	17	Unmodified	_DSVRSGPFGQLFRPDNF_			0	0		Q922F4	Q922F4	Q922F4	Tubb6	Tubulin beta-6 chain	MULTI-MSMS	20230107_Microdroplet_Brain_BU_LongerGradient_250um	Brain_BU_LongerGradient_250um	970.478	2	969.976	1937.94	1.6453	0.0015959	-0.027494	-2.6669e-05	1.6178	0.0015693	970.478	19.714	1.3496	19.714	18.906	20.256	0					52	11	5	0	0	0	6.817e-17	2	2105	235.11	0	1
DTAKGMLPDPKNTHIF	16	Unmodified	_DTAKGMLPDPKNTHIF_			0	0		P51881	P51881	P51881	Slc25a5	ADP/ATP translocase 2;ADP/ATP translocase 2, N-terminally processed	MULTI-MSMS	20230107_Microdroplet_Brain_BU_LongerGradient_250um	Brain_BU_LongerGradient_250um	595.639	3	595.638	1783.89	2.2974	0.0013684	-0.54668	-0.00032563	1.7507	0.0010428	595.972	13.262	1.4499	13.262	12.499	13.949	0					48	13	4	0	0	0	0.019754	1	1369	91.657	44.911	1
DTAKGMLPDPKNVHIIV	17	Unmodified	_DTAKGMLPDPKNVHIIV_			0	0		P48962	P48962	P48962	Slc25a4	ADP/ATP translocase 1	MULTI-MSMS	20230107_Microdroplet_Brain_BU_LongerGradient_250um	Brain_BU_LongerGradient_250um	462.757	4	462.757	1847	2.2312	0.0010325	-0.32882	-0.00015217	1.9024	0.00088036	463.007	17.326	1.3528	17.326	16.616	17.969	0					50	12	5	0	0	0	0.02373	1	1884	85.576	56.764	1
DTILPPTRPTDKPLRLPLQD	20	Unmodified	_DTILPPTRPTDKPLRLPLQD_			0	0		P62631	P62631	P62631	Eef1a2	Elongation factor 1-alpha 2	MULTI-MSMS	20230107_Microdroplet_Brain_BU_LongerGradient_250um	Brain_BU_LongerGradient_250um	763.102	3	762.765	2285.27	2.3421	0.0017864	-0.22401	-0.00017086	2.1181	0.0016156	763.099	17.752	1.1514	17.752	17.347	18.498	0					27	10	4	0	0	0	0.015955	1	1880	91.637	38.359	1
DTILPPTRPTDKPLRLPLQDV	21	Unmodified	_DTILPPTRPTDKPLRLPLQDV_			0	0		P62631	P62631	P62631	Eef1a2	Elongation factor 1-alpha 2	MULTI-MSMS	20230107_Microdroplet_Brain_BU_LongerGradient_250um	Brain_BU_LongerGradient_250um	597.345	4	597.093	2384.34	1.8236	0.0010888	0.25942	0.0001549	2.083	0.0012437	597.344	19.749	1.6843	19.749	18.906	20.591	0					23	14	2	0	0	0	0.038106	1	2117	71.073	32.802	1
DTVLKYLPGPLQD	13	Unmodified	_DTVLKYLPGPLQD_			0	0		P84086	P84086	P84086	Cplx2	Complexin-2	MULTI-MSMS	20230107_Microdroplet_Brain_BU_LongerGradient_250um	Brain_BU_LongerGradient_250um	729.898	2	729.896	1457.78	2.3804	0.0017375	0.73723	0.0005381	3.1177	0.0022756	729.896	18.473	1.1669	18.473	17.857	19.024	0					26	10	3	0	0	0	3.0375e-06	1	1968	180.18	0	1
DTVLKYLPGPLQDM	14	Unmodified	_DTVLKYLPGPLQDM_			0	0		P84086	P84086	P84086	Cplx2	Complexin-2	MULTI-MSMS	20230107_Microdroplet_Brain_BU_LongerGradient_250um	Brain_BU_LongerGradient_250um	795.419	2	795.416	1588.82	2.8042	0.0022305	-0.71896	-0.00057187	2.0852	0.0016586	795.416	22.881	0.94029	22.881	22.322	23.262	0					32	7	5	0	0	0	8.4091e-11	1	2356	206.69	0	1
DVARGVQKILQD	12	Unmodified	_DVARGVQKILQD_			0	0		P56480	P56480	P56480	Atp5b	ATP synthase subunit beta, mitochondrial	MULTI-MSMS	20230107_Microdroplet_Brain_BU_LongerGradient_250um	Brain_BU_LongerGradient_250um	671.379	2	671.378	1340.74	2.6156	0.0017561	2.5016	0.0016795	5.1172	0.0034356	671.379	6.2563	1.1986	6.2563	5.6617	6.8603	0					23	13	3	0	0	0	0.031422	1	667	80.245	27.666	1
DVLDKHLIPAANTGE	15	Unmodified	_DVLDKHLIPAANTGE_			0	0		P62259	P62259	P62259	Ywhae	14-3-3 protein epsilon	MULTI-MSMS	20230107_Microdroplet_Brain_BU_LongerGradient_250um	Brain_BU_LongerGradient_250um	797.421	2	796.918	1591.82	2.2471	0.0017907	-0.17037	-0.00013577	2.0767	0.0016549	797.419	11.409	1.3156	11.409	10.623	11.938	0					26	11	3	0	0	0	0.00028667	1	1205	167.22	103.94	1
DVLDKHLIPAANTGE	15	Unmodified	_DVLDKHLIPAANTGE_			0	0		P62259	P62259	P62259	Ywhae	14-3-3 protein epsilon	MULTI-MSMS	20230107_Microdroplet_Brain_BU_LongerGradient_250um	Brain_BU_LongerGradient_250um	531.615	3	531.614	1591.82	1.9954	0.0010608	-0.17043	-9.0603e-05	1.8249	0.00097016	531.614	11.294	1.8781	11.294	10.512	12.39	0					34	16	3	0	0	0	0.0289	1	1236	82.102	46.898	1
DVLDKHLIPAANTGESKVFY	20	Unmodified	_DVLDKHLIPAANTGESKVFY_			0	0		P62259	P62259	P62259	Ywhae	14-3-3 protein epsilon	MULTI-MSMS	20230107_Microdroplet_Brain_BU_LongerGradient_250um	Brain_BU_LongerGradient_250um	740.059	3	739.723	2216.15	2.2072	0.0016327	0.017758	1.3136e-05	2.2249	0.0016458	740.058	17.307	0.93925	17.307	16.918	17.857	0					25	8	4	0	0	0	0.00042557	1	1846	114.63	90.351	1
DWSHNFTNM	9	Unmodified	_DWSHNFTNM_			0	0		Q9CZU6	Q9CZU6	Q9CZU6	Cs	Citrate synthase, mitochondrial	MULTI-MSMS	20230107_Microdroplet_Brain_BU_LongerGradient_250um	Brain_BU_LongerGradient_250um	576.235	2	576.232	1150.45	1.8613	0.0010725	0.42441	0.00024456	2.2857	0.0013171	576.233	10.139	1.6436	10.139	9.5258	11.169	0					32	14	3	0	0	0	0.0047311	1	1113	118.41	82.537	1
DWVPYINGKF	10	Unmodified	_DWVPYINGKF_			0	0		Q9CPX8	Q9CPX8	Q9CPX8	Uqcr11	Cytochrome b-c1 complex subunit 10	MULTI-MSMS	20230107_Microdroplet_Brain_BU_LongerGradient_250um	Brain_BU_LongerGradient_250um	619.815	2	619.814	1237.61	1.7643	0.0010935	0.99095	0.0006142	2.7552	0.0017077	619.814	19.749	1.3496	19.749	18.906	20.256	0					24	11	3	0	0	0	0.01224	1	2087	103.56	63.562	1
EAKNLKKMDVGGLSDPYVKIHL	22	Unmodified	_EAKNLKKMDVGGLSDPYVKIHL_			0	0		P46096;P46097	P46096	P46096	Syt1;Syt2	Synaptotagmin-1;Synaptotagmin-2	MULTI-MSMS	20230107_Microdroplet_Brain_BU_LongerGradient_250um	Brain_BU_LongerGradient_250um	492.075	5	491.873	2454.33	1.676	0.00082437	0.095809	4.7126e-05	1.7718	0.0008715	492.074	15.632	1.5103	15.632	14.995	16.505	0					51	14	5	0	0	0	0.016206	1	1651	87.326	61.321	1
EAKNLKKMDVGGLSDPYVKIHL	22	Unmodified	_EAKNLKKMDVGGLSDPYVKIHL_			0	0		P46096;P46097	P46096	P46096	Syt1;Syt2	Synaptotagmin-1;Synaptotagmin-2	MULTI-MSMS	20230107_Microdroplet_Brain_BU_LongerGradient_250um	Brain_BU_LongerGradient_250um	614.842	4	614.59	2454.33	2.3867	0.0014669	0.34309	0.00021086	2.7298	0.0016777	614.841	15.646	1.3136	15.646	14.995	16.309	0					37	12	4	0	0	0	0.00020616	1	1668	126.51	97.064	1
EDLEPFKMTPFSA	13	Unmodified	_EDLEPFKMTPFSA_			0	0		P35564	P35564	P35564	Canx	Calnexin	MULTI-MSMS	20230107_Microdroplet_Brain_BU_LongerGradient_250um	Brain_BU_LongerGradient_250um	756.862	2	756.358	1510.7	2.3509	0.0017781	0.13943	0.00010546	2.4903	0.0018835	756.861	20.423	0.90833	20.423	19.914	20.823	0					16	7	3	0	0	0	3.243e-06	1	2163	179.19	125.44	1
EELGNHKAFKKELRHFISGDEPKEKLEL	28	Unmodified	_EELGNHKAFKKELRHFISGDEPKEKLEL_			0	0		P16330	P16330	P16330	Cnp	2,3-cyclic-nucleotide 3-phosphodiesterase	MULTI-MSMS	20230107_Microdroplet_Brain_BU_LongerGradient_250um	Brain_BU_LongerGradient_250um	665.359	5	665.158	3320.75	2.5816	0.0017172	-0.5697	-0.00037894	2.0119	0.0013383	665.358	11.469	2.2018	11.469	10.404	12.606	0					91	19	6	0	0	0	1.4877e-08	1	1233	160.43	119.01	1
EEQQRILDL	9	Unmodified	_EEQQRILDL_			0	0		O08553	O08553	O08553	Dpysl2	Dihydropyrimidinase-related protein 2	MULTI-MSMS	20230107_Microdroplet_Brain_BU_LongerGradient_250um	Brain_BU_LongerGradient_250um	572.305	2	572.304	1142.59	1.6316	0.00093377	2.2714	0.0012999	3.903	0.0022337	572.305	7.5992	1.6091	7.5992	6.7665	8.3756	0					26	15	2	0	0	0	0.022467	1	826	93.162	12.933	1
EIKTDPSIMGGM	12	Unmodified	_EIKTDPSIMGGM_			0	0		Q9DB20	Q9DB20	Q9DB20	Atp5o	ATP synthase subunit O, mitochondrial	MULTI-SECPEP	20230107_Microdroplet_Brain_BU_LongerGradient_250um	Brain_BU_LongerGradient_250um	640.337	2	639.807	1277.6	2.3479	0.0015022	0.34062	0.00021793	2.6885	0.0017201	639.807	10.267	1.1945	10.267	9.7464	10.941	0					17	10	2	0	0	0	0.02523	1	1136	82.645	33.849	1
EKAGAHLKGGAKRVIISAPSADAPMF	26	Unmodified	_EKAGAHLKGGAKRVIISAPSADAPMF_			0	0		P16858	P16858	P16858	Gapdh	Glyceraldehyde-3-phosphate dehydrogenase	MULTI-MSMS	20230107_Microdroplet_Brain_BU_LongerGradient_250um	Brain_BU_LongerGradient_250um	656.612	4	656.36	2621.41	2.3332	0.0015314	0.16395	0.00010761	2.4971	0.001639	656.611	9.4246	2.3544	9.4246	8.3756	10.73	0					53	21	4	0	0	0	0.017226	1	1030	76.417	51.823	1
EKFLIPNASQPESKVFY	17	Unmodified	_EKFLIPNASQPESKVFY_			0	0		P63101	P63101	P63101	Ywhaz	14-3-3 protein zeta/delta	MULTI-MSMS	20230107_Microdroplet_Brain_BU_LongerGradient_250um	Brain_BU_LongerGradient_250um	666.686	3	666.351	1996.03	2.4438	0.0016284	-0.23739	-0.00015819	2.2064	0.0014702	666.685	17.511	1.1598	17.511	16.809	17.969	0					31	10	4	0	0	0	0.00052997	1	1842	126.25	92.941	1
EKSYELPDGQVIT	13	Unmodified	_EKSYELPDGQVIT_			0	0		P63260;P60710;P63268;P68134;P68033;P62737	P63260	P63260	Actg1;Actb;Actg2;Acta1;Actc1;Acta2	Actin, cytoplasmic 2;Actin, cytoplasmic 2, N-terminally processed;Actin, cytoplasmic 1;Actin, cytoplasmic 1, N-terminally processed;Actin, gamma-enteric smooth muscle;Actin, alpha skeletal muscle;Actin, alpha cardiac muscle 1;Actin, aortic smooth muscle	MULTI-SECPEP	20230107_Microdroplet_Brain_BU_LongerGradient_250um	Brain_BU_LongerGradient_250um	740.147	2	739.872	1477.73	2.4437	0.001808	-4.8195	-0.0035658	-2.3758	-0.0017578	740.369	13.201	1.149	13.201	12.707	13.856	0					20	10	3	0	0	0	0.041848	1	1412	66.663	30.078	1
ELNLPTGIPIVY	12	Unmodified	_ELNLPTGIPIVY_			0	0		Q9DBJ1;O70250	Q9DBJ1	Q9DBJ1	Pgam1;Pgam2	Phosphoglycerate mutase 1;Phosphoglycerate mutase 2	MSMS	20230107_Microdroplet_Brain_BU_LongerGradient_250um	Brain_BU_LongerGradient_250um	664.877	2	664.877	1327.74	NaN	NaN	NaN	NaN	NaN	NaN	NaN	25.439	1	25.439	24.939	25.939	0								0	0	0	0.0080428	1	2630	95.502	45.461	1
ELNLPTGIPIVYE	13	Unmodified	_ELNLPTGIPIVYE_			0	0		Q9DBJ1;O70250	Q9DBJ1	Q9DBJ1	Pgam1;Pgam2	Phosphoglycerate mutase 1;Phosphoglycerate mutase 2	MULTI-MSMS	20230107_Microdroplet_Brain_BU_LongerGradient_250um	Brain_BU_LongerGradient_250um	730.404	2	729.398	1456.78	2.4244	0.0017683	1.5941	0.0011628	4.0185	0.0029311	729.899	24.667	1.6519	24.667	23.838	25.49	0					24	13	4	0	0	0	0.01829	1	2572	95.573	51.264	1
ENVKEKWVPEITHHCPKTPFL	21	Unmodified	_ENVKEKWVPEITHHCPKTPFL_			0	0		P60766	P60766	P60766	Cdc42	Cell division control protein 42 homolog	MULTI-MSMS	20230107_Microdroplet_Brain_BU_LongerGradient_250um	Brain_BU_LongerGradient_250um	633.834	4	633.832	2531.3	2.261	0.0014331	0.32622	0.00020677	2.5872	0.0016398	633.833	15.65	2.1293	15.65	14.995	17.124	0					57	20	4	0	0	0	0.00013753	1	1663	139.26	104.35	1
EQLSPFPFDL	10	Unmodified	_EQLSPFPFDL_			0	0		Q60597	Q60597	Q60597	Ogdh	2-oxoglutarate dehydrogenase, mitochondrial	MULTI-SECPEP	20230107_Microdroplet_Brain_BU_LongerGradient_250um	Brain_BU_LongerGradient_250um	597.38	2	596.798	1191.58	2.0981	0.0012521	-0.67071	-0.00040028	1.4274	0.00085185	596.798	24.958	1.0624	24.958	24.547	25.609	0					11	8	2	0	0	0	0.0060957	1	2582	107.57	58.78	1
ERIDKIWPKL	10	Unmodified	_ERIDKIWPKL_			0	0		G5E829;Q9R0K7	G5E829	G5E829	Atp2b1;Atp2b2	Plasma membrane calcium-transporting ATPase 1;Plasma membrane calcium-transporting ATPase 2	MULTI-MSMS	20230107_Microdroplet_Brain_BU_LongerGradient_250um	Brain_BU_LongerGradient_250um	433.259	3	433.259	1296.76	1.997	0.00086524	0.11531	4.9961e-05	2.1124	0.0009152	433.259	10.178	1.7407	10.178	9.311	11.052	0					31	15	3	0	0	0	0.014556	1	1072	100.69	66.481	1
ESPIPILPLPTPDAE	15	Unmodified	_ESPIPILPLPTPDAE_			0	0		Q9Z2Q6	Q9Z2Q6	Q9Z2Q6	2023-09-05	Septin-5	MULTI-MSMS	20230107_Microdroplet_Brain_BU_LongerGradient_250um	Brain_BU_LongerGradient_250um	794.93	2	794.927	1587.84	2.386	0.0018967	1.3505	0.0010735	3.7365	0.0029702	794.928	24.554	0.8273	24.554	24.071	24.898	0					24	6	4	0	0	0	0.01681	1	2526	96.143	70.706	1
ESPIPILPLPTPDAET	16	Unmodified	_ESPIPILPLPTPDAET_			0	0		Q9Z2Q6	Q9Z2Q6	Q9Z2Q6	2023-09-05	Septin-5	MULTI-MSMS	20230107_Microdroplet_Brain_BU_LongerGradient_250um	Brain_BU_LongerGradient_250um	845.452	2	845.451	1688.89	2.2029	0.0018624	-1.1437	-0.00096694	1.0592	0.0008955	845.451	24.379	1.1805	24.379	23.955	25.135	0					27	9	4	0	0	0	0.00064934	1	2523	125.48	55.38	1
EVLRNGVKVVRSLKPDF	17	Unmodified	_EVLRNGVKVVRSLKPDF_			0	0		O88935	O88935	O88935	Syn1	Synapsin-1	MULTI-MSMS	20230107_Microdroplet_Brain_BU_LongerGradient_250um	Brain_BU_LongerGradient_250um	653.054	3	652.718	1955.13	2.3701	0.001547	0.36568	0.00023869	2.7358	0.0017857	653.053	10.128	1.7407	10.128	9.311	11.052	0					47	15	4	0	0	0	0.030959	1	1061	76.494	54.961	1
FADKVPKTAENF	12	Unmodified	_FADKVPKTAENF_			0	0		P17742	P17742	P17742	Ppia	Peptidyl-prolyl cis-trans isomerase A;Peptidyl-prolyl cis-trans isomerase A, N-terminally processed	MULTI-MSMS	20230107_Microdroplet_Brain_BU_LongerGradient_250um	Brain_BU_LongerGradient_250um	684.357	2	683.854	1365.69	2.2796	0.0015589	0.028287	1.9344e-05	2.3079	0.0015783	684.355	5.4604	0.82964	5.4604	5.0905	5.9202	0					13	10	2	0	0	0	0.021565	1	546	91.752	40.307	1
FAFKDKYKQIF	11	Unmodified	_FAFKDKYKQIF_			0	0		P48962;P51881	P48962;P51881	P48962	Slc25a4;Slc25a5	ADP/ATP translocase 1;ADP/ATP translocase 2;ADP/ATP translocase 2, N-terminally processed	MULTI-MSMS	20230107_Microdroplet_Brain_BU_LongerGradient_250um	Brain_BU_LongerGradient_250um	479.266	3	478.931	1433.77	2.2894	0.0010964	0.0535	2.5623e-05	2.3429	0.0011221	478.931	10.526	2.8527	10.526	9.2031	12.056	0					64	25	4	0	0	0	0.00047422	2	1159	125.97	79.908	1
FAFKDKYKQIF	11	Unmodified	_FAFKDKYKQIF_			0	0		P48962;P51881	P48962;P51881	P48962	Slc25a4;Slc25a5	ADP/ATP translocase 1;ADP/ATP translocase 2;ADP/ATP translocase 2, N-terminally processed	MULTI-MSMS	20230107_Microdroplet_Brain_BU_LongerGradient_250um	Brain_BU_LongerGradient_250um	717.893	2	717.893	1433.77	2.4045	0.0017262	-0.22662	-0.00016269	2.1779	0.0015635	717.893	10.499	1.3102	10.499	9.8592	11.169	0					25	11	3	0	0	0	0.0020527	1	1139	123.75	77.287	1
FAKALESPERPFL	13	Unmodified	_FAKALESPERPFL_			0	0		P09411	P09411	P09411	Pgk1	Phosphoglycerate kinase 1	MULTI-MSMS	20230107_Microdroplet_Brain_BU_LongerGradient_250um	Brain_BU_LongerGradient_250um	502.278	3	502.277	1503.81	2.0773	0.0010434	0.3189	0.00016017	2.3962	0.0012036	502.277	13.147	1.4658	13.147	12.39	13.856	0					41	13	4	0	0	0	0.0010925	1	1349	127.71	80.156	1
FAPIHAEAPEF	11	Unmodified	_FAPIHAEAPEF_			0	0		P56480	P56480	P56480	Atp5b	ATP synthase subunit beta, mitochondrial	MULTI-MSMS	20230107_Microdroplet_Brain_BU_LongerGradient_250um	Brain_BU_LongerGradient_250um	614.805	2	614.803	1227.59	2.2993	0.0014136	-0.14708	-9.0428e-05	2.1522	0.0013232	614.803	14.797	1.3159	14.797	14.155	15.471	0					38	12	4	0	0	0	0.0024094	1	1597	118.32	71.127	1
FDISKKEMQPTHPIRLGL	18	Unmodified	_FDISKKEMQPTHPIRLGL_			0	0		P68254	P68254	P68254	Ywhaq	14-3-3 protein theta	MULTI-MSMS	20230107_Microdroplet_Brain_BU_LongerGradient_250um	Brain_BU_LongerGradient_250um	528.545	4	528.292	2109.14	1.648	0.00087064	0.26803	0.0001416	1.9161	0.0010122	528.543	14.321	1.6044	14.321	13.652	15.256	0					48	15	5	0	0	0	0.012606	2	1564	98.796	56.459	1
FDITADDEPLGRVSFEL	17	Unmodified	_FDITADDEPLGRVSFEL_			0	0		P17742	P17742	P17742	Ppia	Peptidyl-prolyl cis-trans isomerase A;Peptidyl-prolyl cis-trans isomerase A, N-terminally processed	MULTI-SECPEP	20230107_Microdroplet_Brain_BU_LongerGradient_250um	Brain_BU_LongerGradient_250um	963.811	2	962.47	1922.93	2.2605	0.0021756	-1.5058	-0.0014492	0.7547	0.00072638	962.469	24.67	0.70737	24.67	24.428	25.135	0					7	5	2	0	0	0	2.9098e-06	1	2567	173.06	115.22	1
FDKPVSPLL	9	Unmodified	_FDKPVSPLL_			0	0		Q04447;P07310;Q6P8J7;P30275	Q04447;P30275	Q04447	Ckb;Ckm;Ckmt2;Ckmt1	Creatine kinase B-type;Creatine kinase M-type;Creatine kinase S-type, mitochondrial;Creatine kinase U-type, mitochondrial	MULTI-MSMS	20230107_Microdroplet_Brain_BU_LongerGradient_250um	Brain_BU_LongerGradient_250um	508.296	2	508.295	1014.57	2.3571	0.0011981	-0.063181	-3.2115e-05	2.2939	0.001166	508.295	12.098	2.0642	12.098	11.169	13.234	0					51	18	4	0	0	0	0.0016727	2	1288	144.09	49.682	1
FDLYPHVVGF	10	Unmodified	_FDLYPHVVGF_			0	0		Q5FWK3	Q5FWK3	Q5FWK3	Arhgap1	Rho GTPase-activating protein 1	MULTI-MSMS	20230107_Microdroplet_Brain_BU_LongerGradient_250um	Brain_BU_LongerGradient_250um	597.305	2	597.303	1192.59	2.1059	0.0012579	1.6237	0.00096984	3.7296	0.0022277	597.304	22.078	0.81264	22.078	21.626	22.439	0					10	6	2	0	0	0	0.0099433	1	2316	106.42	70.797	1
FEDLEPFKMTPFSA	14	Unmodified	_FEDLEPFKMTPFSA_			0	0		P35564	P35564	P35564	Canx	Calnexin	MULTI-MSMS	20230107_Microdroplet_Brain_BU_LongerGradient_250um	Brain_BU_LongerGradient_250um	829.894	2	829.892	1657.77	2.4105	0.0020004	-0.78752	-0.00065356	1.623	0.0013469	829.891	23.093	1.5274	23.093	21.97	23.497	0					30	12	5	0	0	0	0.00010291	1	2383	151.26	101.15	1
FEGPPFKFKF	10	Unmodified	_FEGPPFKFKF_			0	0		O88342	O88342	O88342	Wdr1	WD repeat-containing protein 1	MSMS	20230107_Microdroplet_Brain_BU_LongerGradient_250um	Brain_BU_LongerGradient_250um	415.223	3	415.222	1242.64	NaN	NaN	NaN	NaN	NaN	NaN	NaN	18.877	1	18.877	18.377	19.377	0								0	0	0	0.012812	1	2005	91.095	31.831	1
FEISKKEMQPTHPIRL	16	Unmodified	_FEISKKEMQPTHPIRL_			0	0		P63101;Q9CQV8	P63101	P63101	Ywhaz;Ywhab	14-3-3 protein zeta/delta;14-3-3 protein beta/alpha;14-3-3 protein beta/alpha, N-terminally processed	MULTI-MSMS	20230107_Microdroplet_Brain_BU_LongerGradient_250um	Brain_BU_LongerGradient_250um	489.521	4	489.27	1953.05	1.5984	0.00078203	-1.0735	-0.00052525	0.52481	0.00025677	489.519	7.5489	2.1371	7.5489	6.2385	8.3756	0					46	21	3	0	0	0	0.028029	1	777	81.656	34.124	1
FEISKKEMQPTHPIRL	16	Unmodified	_FEISKKEMQPTHPIRL_			0	0		P63101;Q9CQV8	P63101	P63101	Ywhaz;Ywhab	14-3-3 protein zeta/delta;14-3-3 protein beta/alpha;14-3-3 protein beta/alpha, N-terminally processed	MULTI-MSMS	20230107_Microdroplet_Brain_BU_LongerGradient_250um	Brain_BU_LongerGradient_250um	652.36	3	652.024	1953.05	2.1523	0.0014034	-0.68539	-0.00044689	1.467	0.00095649	652.359	7.1191	1.3032	7.1191	6.7665	8.0697	0					26	12	3	0	0	0	0.021236	1	798	89.866	50.181	1
FEISKKEMQPTHPIRLGL	18	Unmodified	_FEISKKEMQPTHPIRLGL_			0	0		P63101;Q9CQV8	P63101	P63101	Ywhaz;Ywhab	14-3-3 protein zeta/delta;14-3-3 protein beta/alpha;14-3-3 protein beta/alpha, N-terminally processed	MULTI-MSMS	20230107_Microdroplet_Brain_BU_LongerGradient_250um	Brain_BU_LongerGradient_250um	532.048	4	531.796	2123.16	1.5747	0.00083741	-0.042263	-2.2475e-05	1.5324	0.00081494	532.047	13.815	2.087	13.815	12.806	14.893	0					70	19	6	0	0	0	0.00043443	2	1476	126.19	81.895	1
FEISKKEMQPTHPIRLGL	18	Unmodified	_FEISKKEMQPTHPIRLGL_			0	0		P63101;Q9CQV8	P63101	P63101	Ywhaz;Ywhab	14-3-3 protein zeta/delta;14-3-3 protein beta/alpha;14-3-3 protein beta/alpha, N-terminally processed	MULTI-MSMS	20230107_Microdroplet_Brain_BU_LongerGradient_250um	Brain_BU_LongerGradient_250um	709.062	3	708.726	2123.16	1.9839	0.001406	0.021152	1.4991e-05	2.005	0.001421	709.06	13.782	2.6174	13.782	12.276	14.893	0					59	24	4	0	0	0	3.923e-07	2	1487	174.02	130.01	1
FEISKKEMQPTHPIRLGL	18	Unmodified	_FEISKKEMQPTHPIRLGL_			0	0		P63101;Q9CQV8	P63101	P63101	Ywhaz;Ywhab	14-3-3 protein zeta/delta;14-3-3 protein beta/alpha;14-3-3 protein beta/alpha, N-terminally processed	MULTI-MSMS	20230107_Microdroplet_Brain_BU_LongerGradient_250um	Brain_BU_LongerGradient_250um	425.84	5	425.639	2123.16	1.5376	0.00065448	0.096947	4.1264e-05	1.6346	0.00069574	425.839	13.866	1.8704	13.866	13.023	14.893	0					63	17	6	0	0	0	0.00047706	1	1500	123.4	81.059	1
FEITDEPPYIHF	12	Unmodified	_FEITDEPPYIHF_			0	0		Q9WUM3	Q9WUM3	Q9WUM3	Coro1b	Coronin-1B	MULTI-MSMS	20230107_Microdroplet_Brain_BU_LongerGradient_250um	Brain_BU_LongerGradient_250um	754.361	2	754.359	1506.7	1.6606	0.0012527	0.64902	0.0004896	2.3096	0.0017423	754.359	27.416	2.3565	27.416	25.848	28.205	0					33	19	2	0	0	0	0.0022667	1	2793	114.28	42.83	1
FEWLKNLNHVSY	12	Unmodified	_FEWLKNLNHVSY_			0	0		P26443	P26443	P26443	Glud1	Glutamate dehydrogenase 1, mitochondrial	MULTI-MSMS	20230107_Microdroplet_Brain_BU_LongerGradient_250um	Brain_BU_LongerGradient_250um	517.266	3	517.265	1548.77	2.1935	0.0011346	-0.11276	-5.8324e-05	2.0807	0.0010763	517.265	17.915	1.2579	17.915	17.347	18.605	0					29	11	3	0	0	0	0.00055843	1	1898	144.27	103.54	1
FEYPFRLHQ	9	Unmodified	_FEYPFRLHQ_			0	0		Q62277	Q62277	Q62277	Syp	Synaptophysin	MULTI-MSMS	20230107_Microdroplet_Brain_BU_LongerGradient_250um	Brain_BU_LongerGradient_250um	618.813	2	618.812	1235.61	2.0529	0.0012704	0.039623	2.4519e-05	2.0925	0.0012949	618.811	13.657	1.4586	13.657	12.913	14.371	0					34	13	4	0	0	0	0.023053	1	1433	92.439	30.239	1
FEYPFRLHQ	9	Unmodified	_FEYPFRLHQ_			0	0		Q62277	Q62277	Q62277	Syp	Synaptophysin	MULTI-MSMS	20230107_Microdroplet_Brain_BU_LongerGradient_250um	Brain_BU_LongerGradient_250um	412.877	3	412.877	1235.61	1.7187	0.00070962	0.067521	2.7878e-05	1.7863	0.0007375	412.877	13.632	1.5648	13.632	12.806	14.371	0					45	14	4	0	0	0	0.011004	1	1454	92.051	36.484	1
FEYPFRLHQVY	11	Unmodified	_FEYPFRLHQVY_			0	0		Q62277	Q62277	Q62277	Syp	Synaptophysin	MULTI-MSMS	20230107_Microdroplet_Brain_BU_LongerGradient_250um	Brain_BU_LongerGradient_250um	500.255	3	500.254	1497.74	1.9955	0.00099824	0.45875	0.00022949	2.4542	0.0012277	500.254	17.878	1.2666	17.878	17.124	18.391	0					38	11	4	0	0	0	0.0021744	1	1863	121.9	72.398	1
FEYPFRLHQVY	11	Unmodified	_FEYPFRLHQVY_			0	0		Q62277	Q62277	Q62277	Syp	Synaptophysin	MULTI-MSMS	20230107_Microdroplet_Brain_BU_LongerGradient_250um	Brain_BU_LongerGradient_250um	749.88	2	749.878	1497.74	2.3564	0.001767	1.7993	0.0013492	4.1557	0.0031162	749.879	17.676	0.62223	17.676	17.347	17.969	0					14	5	3	0	0	0	0.0018919	1	1876	134.25	69.022	1
FFNGKELNKSINPDEA	16	Unmodified	_FFNGKELNKSINPDEA_			0	0		P63017;P17156	P63017	P63017	Hspa8;Hspa2	Heat shock cognate 71 kDa protein;Heat shock-related 70 kDa protein 2	MULTI-SECPEP	20230107_Microdroplet_Brain_BU_LongerGradient_250um	Brain_BU_LongerGradient_250um	609.306	3	608.304	1821.89	2.0875	0.0012698	-0.053573	-3.2589e-05	2.0339	0.0012372	608.304	7.5992	1.3081	7.5992	6.8603	8.1684	0					29	12	3	0	0	0	0.028989	1	790	78.69	32.372	1
FGGAGVGKTVL	11	Unmodified	_FGGAGVGKTVL_			0	0		P56480	P56480	P56480	Atp5b	ATP synthase subunit beta, mitochondrial	MSMS	20230107_Microdroplet_Brain_BU_LongerGradient_250um	Brain_BU_LongerGradient_250um	503.29	2	503.29	1004.57	NaN	NaN	NaN	NaN	NaN	NaN	NaN	6.5451	1	6.5451	6.0451	7.0451	0								0	0	0	0.016331	1	707	86.882	46.309	1
FGLSPFEPWTTKD	13	Unmodified	_FGLSPFEPWTTKD_			0	0		Q9DC69	Q9DC69	Q9DC69	Ndufa9	NADH dehydrogenase [ubiquinone] 1 alpha subcomplex subunit 9, mitochondrial	MULTI-MSMS	20230107_Microdroplet_Brain_BU_LongerGradient_250um	Brain_BU_LongerGradient_250um	762.874	2	762.872	1523.73	2.3171	0.0017677	-0.44162	-0.0003369	1.8755	0.0014308	762.872	20.879	1.1489	20.879	20.478	21.626	0					27	9	4	0	0	0	5.7846e-09	1	2204	196.11	147.32	1
FGPVPDTARY	10	Unmodified	_FGPVPDTARY_			0	0		Q99KI0	Q99KI0	Q99KI0	Aco2	Aconitate hydratase, mitochondrial	MULTI-MSMS	20230107_Microdroplet_Brain_BU_LongerGradient_250um	Brain_BU_LongerGradient_250um	561.783	2	561.783	1121.55	2.0897	0.001174	-0.077469	-4.3521e-05	2.0123	0.0011304	561.782	8.0227	1.861	8.0227	7.1373	8.9983	0					30	17	2	0	0	0	0.034933	1	905	75.378	16.397	1
FGTGFPHMLF	10	Unmodified	_FGTGFPHMLF_			0	0		P67871	P67871	P67871	Csnk2b	Casein kinase II subunit beta	MULTI-MSMS	20230107_Microdroplet_Brain_BU_LongerGradient_250um	Brain_BU_LongerGradient_250um	577.28	2	577.279	1152.54	1.8301	0.0010565	0.03688	2.129e-05	1.867	0.0010778	577.279	22.056	0.92761	22.056	21.626	22.554	0					14	7	3	0	0	0	5.8136e-05	1	2317	171.08	126	1
FGTIGIGTPAQD	12	Unmodified	_FGTIGIGTPAQD_			0	0		P00791	P00791	P00791			MULTI-MSMS	20230107_Microdroplet_Brain_BU_LongerGradient_250um	Brain_BU_LongerGradient_250um	588.799	2	588.798	1175.58	2.4956	0.0014694	0.35951	0.00021168	2.8551	0.0016811	588.798	12.405	1.8473	12.405	11.283	13.131	0					34	16	3	0	0	0	0.0010118	1	1278	135.63	76.653	1
FGTIGIGTPAQDF	13	Unmodified	_FGTIGIGTPAQDF_			0	0		P00791	P00791	P00791			MULTI-MSMS	20230107_Microdroplet_Brain_BU_LongerGradient_250um	Brain_BU_LongerGradient_250um	662.335	2	662.333	1322.65	1.8939	0.0012544	0.31621	0.00020944	2.2101	0.0014638	662.333	19.493	1.3496	19.493	18.906	20.256	0					31	11	4	0	0	0	4.728e-07	1	2033	192.5	125.99	1
FHVVIAGPQDSPFEGGTF	18	Unmodified	_FHVVIAGPQDSPFEGGTF_			0	0		P61089	P61089	P61089	Ube2n	Ubiquitin-conjugating enzyme E2 N	MULTI-MSMS	20230107_Microdroplet_Brain_BU_LongerGradient_250um	Brain_BU_LongerGradient_250um	952.963	2	952.963	1903.91	1.8892	0.0018003	-1.2277	-0.00117	0.66149	0.00063037	952.962	21.688	0.92608	21.688	21.279	22.205	0					19	7	4	0	0	0	2.1478e-11	1	2283	205.8	144.46	1
FIIANIPLPLGT	12	Unmodified	_FIIANIPLPLGT_			0	0		Q6PIE5;Q8VDN2	Q6PIE5;Q8VDN2	Q8VDN2	Atp1a2;Atp1a1	Sodium/potassium-transporting ATPase subunit alpha-2;Sodium/potassium-transporting ATPase subunit alpha-1	MULTI-MSMS	20230107_Microdroplet_Brain_BU_LongerGradient_250um	Brain_BU_LongerGradient_250um	634.884	2	634.884	1267.75	1.7971	0.0011409	-0.81914	-0.00052006	0.97793	0.00062087	634.884	27.931	1.1675	27.931	27.037	28.205	0					16	9	3	0	0	0	0.011448	1	2858	103.56	48.014	1
FIIPNIVKYSPHCKL	15	Unmodified	_FIIPNIVKYSPHCKL_			0	0		P06151	P06151	P06151	Ldha	L-lactate dehydrogenase A chain	MULTI-MSMS	20230107_Microdroplet_Brain_BU_LongerGradient_250um	Brain_BU_LongerGradient_250um	444.005	4	443.754	1770.99	1.9392	0.00086053	0.079124	3.5112e-05	2.0183	0.00089564	443.754	20.375	1.8019	20.375	18.906	20.708	0					33	15	4	0	0	0	0.020323	1	2143	92.063	38.811	1
FKEAFSL	7	Unmodified	_FKEAFSL_			0	0		P0DP28;P0DP27;P0DP26;Q9D6P8;P09541	P0DP28	P0DP28	Calml3;Myl4	Calmodulin-like protein 3;Myosin light chain 4	MULTI-MSMS	20230107_Microdroplet_Brain_BU_LongerGradient_250um	Brain_BU_LongerGradient_250um	422.23	2	421.226	840.438	1.878	0.00079105	-0.11216	-4.7243e-05	1.7658	0.0007438	421.226	9.5345	2.5652	9.5345	8.3756	10.941	0					60	23	4	0	0	0	0.0033001	2	1007	149.48	11.004	1
FKFIIPQIV	9	Unmodified	_FKFIIPQIV_			0	0		P16125	P16125	P16125	Ldhb	L-lactate dehydrogenase B chain	MULTI-MSMS	20230107_Microdroplet_Brain_BU_LongerGradient_250um	Brain_BU_LongerGradient_250um	552.845	2	552.844	1103.67	2.2137	0.0012239	-0.13062	-7.221e-05	2.0831	0.0011516	552.844	24.958	1.4191	24.958	24.19	25.609	0					26	11	3	0	0	0	0.0096111	1	2590	109.01	59.654	1
FKFIIPQIVKY	11	Unmodified	_FKFIIPQIVKY_			0	0		P16125	P16125	P16125	Ldhb	L-lactate dehydrogenase B chain	MULTI-MSMS	20230107_Microdroplet_Brain_BU_LongerGradient_250um	Brain_BU_LongerGradient_250um	465.952	3	465.951	1394.83	2.9768	0.001387	-1.1615	-0.00054119	1.8153	0.00084585	465.951	22.924	1.1752	22.924	22.322	23.497	0					22	9	3	0	0	0	0.0015798	1	2382	130.94	91.674	1
FKFIIPQIVKYSPDCT	16	Unmodified	_FKFIIPQIVKYSPDCT_			0	0		P16125	P16125	P16125	Ldhb	L-lactate dehydrogenase B chain	MULTI-MSMS	20230107_Microdroplet_Brain_BU_LongerGradient_250um	Brain_BU_LongerGradient_250um	634.01	3	633.674	1898	2.194	0.0013903	1.8983	0.0012029	4.0922	0.0025931	634.01	23.381	1.2833	23.381	22.907	24.19	0					16	10	2	0	0	0	0.011674	1	2446	101.42	77.011	1
FKFIIPQIVKYSPDCTI	17	Unmodified	_FKFIIPQIVKYSPDCTI_			0	0		P16125	P16125	P16125	Ldhb	L-lactate dehydrogenase B chain	MULTI-MSMS	20230107_Microdroplet_Brain_BU_LongerGradient_250um	Brain_BU_LongerGradient_250um	671.704	3	671.369	2011.09	1.9569	0.0013138	0.8402	0.00056408	2.7971	0.0018779	671.704	25.908	0.71373	25.908	25.254	25.967	0					10	5	2	0	0	0	0.015268	1	2665	96.208	68.125	1
FKFLPFSF	8	Unmodified	_FKFLPFSF_			0	0		Q9Z1G4	Q9Z1G4	Q9Z1G4	Atp6v0a1	V-type proton ATPase 116 kDa subunit a isoform 1	MULTI-MSMS	20230107_Microdroplet_Brain_BU_LongerGradient_250um	Brain_BU_LongerGradient_250um	516.783	2	516.781	1031.55	1.5373	0.00079444	0.40319	0.00020836	1.9405	0.0010028	516.781	25.941	1.5476	25.941	25.372	26.919	0					22	12	3	0	0	0	0.0037492	1	2661	135.84	97.604	1
FKFPFTF	7	Unmodified	_FKFPFTF_			0	0		Q99104	Q99104	Q99104	Myo5a	Unconventional myosin-Va	MSMS	20230107_Microdroplet_Brain_BU_LongerGradient_250um	Brain_BU_LongerGradient_250um	467.248	2	467.247	932.48	NaN	NaN	NaN	NaN	NaN	NaN	NaN	24.109	1	24.109	23.609	24.609	0								0	0	0	0.0008911	1	2506	121.29	41.839	1
FKLSISAL	8	Unmodified	_FKLSISAL_			0	0		P16330	P16330	P16330	Cnp	2,3-cyclic-nucleotide 3-phosphodiesterase	MULTI-MSMS	20230107_Microdroplet_Brain_BU_LongerGradient_250um	Brain_BU_LongerGradient_250um	439.772	2	439.771	877.527	2.1153	0.00093024	0.06604	2.9043e-05	2.1813	0.00095928	439.771	17.898	1.3563	17.898	17.347	18.703	0					31	12	3	0	0	0	0.00069761	1	1904	159.04	64.777	1
FKQLQVVPLF	10	Unmodified	_FKQLQVVPLF_			0	0		Q7TMB8;Q5SQX6	Q7TMB8	Q7TMB8	Cyfip1;Cyfip2	Cytoplasmic FMR1-interacting protein 1;Cytoplasmic FMR1-interacting protein 2	MULTI-MSMS	20230107_Microdroplet_Brain_BU_LongerGradient_250um	Brain_BU_LongerGradient_250um	609.867	2	609.866	1217.72	2.047	0.0012484	-0.53605	-0.00032692	1.5109	0.00092146	609.866	21.694	0.92266	21.694	21.047	21.97	0					19	7	3	0	0	0	0.016478	1	2272	98.299	39.094	1
FKSPDDPSRYITPDQL	16	Unmodified	_FKSPDDPSRYITPDQL_			0	0		P17182	P17182	P17182	Eno1	Alpha-enolase	MULTI-MSMS	20230107_Microdroplet_Brain_BU_LongerGradient_250um	Brain_BU_LongerGradient_250um	627.314	3	626.979	1877.92	2.3098	0.0014482	-0.29496	-0.00018493	2.0148	0.0012633	627.313	14.969	1.4229	14.969	14.155	15.578	0					54	13	5	0	0	0	0.00055031	2	1552	129.93	72.126	1
FKSPDDPSRYITPDQL	16	Unmodified	_FKSPDDPSRYITPDQL_			0	0		P17182	P17182	P17182	Eno1	Alpha-enolase	MULTI-MSMS	20230107_Microdroplet_Brain_BU_LongerGradient_250um	Brain_BU_LongerGradient_250um	940.468	2	939.965	1877.92	2.2314	0.0020975	-0.11091	-0.00010425	2.1205	0.0019932	939.965	15.006	1.0979	15.006	14.261	15.359	0					21	10	3	0	0	0	0.00027276	1	1568	182.72	125.94	1
FKVPMNTVD	9	Unmodified	_FKVPMNTVD_			0	0		P46096	P46096	P46096	Syt1	Synaptotagmin-1	MULTI-SECPEP	20230107_Microdroplet_Brain_BU_LongerGradient_250um	Brain_BU_LongerGradient_250um	526.776	2	525.768	1049.52	1.9554	0.0010281	-0.81039	-0.00042608	1.145	0.00060202	525.768	8.2088	2.3052	8.2088	7.554	9.8592	0					31	21	2	0	0	0	0.037397	1	936	78.334	48.958	1
FKVPYSEL	8	Unmodified	_FKVPYSEL_			0	0		P46096	P46096	P46096	Syt1	Synaptotagmin-1	MULTI-MSMS	20230107_Microdroplet_Brain_BU_LongerGradient_250um	Brain_BU_LongerGradient_250um	491.767	2	491.766	981.517	1.4761	0.00072588	0.56728	0.00027897	2.0434	0.0010049	491.766	14.607	1.6479	14.607	13.444	15.092	0					32	15	3	0	0	0	0.0067478	1	1521	116.88	40.849	1
FLIPIGKAKIERQGTHITV	19	Unmodified	_FLIPIGKAKIERQGTHITV_			0	0		Q9D051	Q9D051	Q9D051	Pdhb	Pyruvate dehydrogenase E1 component subunit beta, mitochondrial	MULTI-MSMS	20230107_Microdroplet_Brain_BU_LongerGradient_250um	Brain_BU_LongerGradient_250um	425.258	5	425.057	2120.25	2.0374	0.00086599	0.15131	6.4316e-05	2.1887	0.00093031	425.057	15.565	1.4207	15.565	14.78	16.2	0					29	13	3	0	0	0	0.022943	1	1666	83.758	57.284	1
FLIPVQTQHPIRKGLHHKILL	21	Unmodified	_FLIPVQTQHPIRKGLHHKILL_			0	0		P06745	P06745	P06745	Gpi	Glucose-6-phosphate isomerase	MULTI-MSMS	20230107_Microdroplet_Brain_BU_LongerGradient_250um	Brain_BU_LongerGradient_250um	498.708	5	498.506	2487.5	2.172	0.0010827	0.42254	0.00021064	2.5945	0.0012934	498.707	12.279	1.4182	12.279	11.605	13.023	0					39	12	5	0	0	0	0.022997	1	1292	78.661	51.051	1
FLYPKTGVTGPYVL	14	Unmodified	_FLYPKTGVTGPYVL_			0	0		Q9CQQ7	Q9CQQ7	Q9CQQ7	Atp5f1	ATP synthase F(0) complex subunit B1, mitochondrial	MULTI-MSMS	20230107_Microdroplet_Brain_BU_LongerGradient_250um	Brain_BU_LongerGradient_250um	777.934	2	777.932	1553.85	2.5533	0.0019863	0.55348	0.00043057	3.1067	0.0024168	777.932	20.484	1.1301	20.484	19.693	20.823	0					24	9	4	0	0	0	0.00095532	1	2151	123.01	67.44	1
FMPGFAPLTA	10	Unmodified	_FMPGFAPLTA_			0	0		Q922F4;A2AQ07;Q9ERD7	Q922F4;Q9ERD7	Q922F4	Tubb6;Tubb1;Tubb3	Tubulin beta-6 chain;Tubulin beta-1 chain;Tubulin beta-3 chain	MULTI-MSMS	20230107_Microdroplet_Brain_BU_LongerGradient_250um	Brain_BU_LongerGradient_250um	526.268	2	526.268	1050.52	1.8096	0.00095233	-1.3243	-0.00069695	0.48525	0.00025537	526.267	20.062	1.3632	20.062	19.46	20.823	0					33	11	4	0	0	0	0.001856	1	2102	133.7	87.276	1
FMPGFAPLTS	10	Unmodified	_FMPGFAPLTS_			0	0		P68372;P99024;Q7TMM9;Q9CWF2;Q9D6F9	P68372;P99024;Q7TMM9;Q9D6F9	P68372	Tubb4b;Tubb5;Tubb2a;Tubb2b;Tubb4a	Tubulin beta-4B chain;Tubulin beta-5 chain;Tubulin beta-2A chain;Tubulin beta-2B chain;Tubulin beta-4A chain	MULTI-SECPEP	20230107_Microdroplet_Brain_BU_LongerGradient_250um	Brain_BU_LongerGradient_250um	534.325	2	534.265	1066.52	1.965	0.0010499	0.05909	3.157e-05	2.0241	0.0010814	534.265	18.777	1.0548	18.777	17.969	19.024	0					20	9	3	0	0	0	0.0065799	1	1971	105.12	69.236	1
FMPGFAPLTSRGSQQ	15	Unmodified	_FMPGFAPLTSRGSQQ_			0	0		P68372;P99024;Q7TMM9;Q9CWF2;Q9D6F9	P68372;P99024;Q7TMM9;Q9D6F9	P68372	Tubb4b;Tubb5;Tubb2a;Tubb2b;Tubb4a	Tubulin beta-4B chain;Tubulin beta-5 chain;Tubulin beta-2A chain;Tubulin beta-2B chain;Tubulin beta-4A chain	MULTI-MSMS	20230107_Microdroplet_Brain_BU_LongerGradient_250um	Brain_BU_LongerGradient_250um	812.403	2	812.401	1622.79	2.2262	0.0018086	-0.23586	-0.00019161	1.9904	0.001617	812.401	15.015	2.2576	15.015	14.051	16.309	0					91	21	6	0	0	0	5.663e-11	3	1607	210.95	167.54	1
FMPGFAPLTSRGSQQ	15	Unmodified	_FMPGFAPLTSRGSQQ_			0	0		P68372;P99024;Q7TMM9;Q9CWF2;Q9D6F9	P68372;P99024;Q7TMM9;Q9D6F9	P68372	Tubb4b;Tubb5;Tubb2a;Tubb2b;Tubb4a	Tubulin beta-4B chain;Tubulin beta-5 chain;Tubulin beta-2A chain;Tubulin beta-2B chain;Tubulin beta-4A chain	MULTI-MSMS	20230107_Microdroplet_Brain_BU_LongerGradient_250um	Brain_BU_LongerGradient_250um	541.938	3	541.936	1622.79	2.273	0.0012318	0.54202	0.00029374	2.815	0.0015256	541.937	14.988	2.657	14.988	13.652	16.309	0					87	25	5	0	0	0	0.00017043	1	1619	113.67	85.529	1
FNCSPHPYWLPNF	13	Unmodified	_FNCSPHPYWLPNF_			0	0		P63328;P48455;P48453	P63328;P48453	P48453	Ppp3ca;Ppp3cc;Ppp3cb	Serine/threonine-protein phosphatase 2B catalytic subunit alpha isoform;Serine/threonine-protein phosphatase 2B catalytic subunit gamma isoform;Serine/threonine-protein phosphatase 2B catalytic subunit beta isoform	MULTI-MSMS	20230107_Microdroplet_Brain_BU_LongerGradient_250um	Brain_BU_LongerGradient_250um	811.368	2	811.366	1620.72	2.1744	0.0017642	-0.059978	-4.8664e-05	2.1144	0.0017156	811.367	23.352	0.93115	23.352	22.907	23.838	0					21	7	4	0	0	0	0.0010878	1	2424	127.83	80.228	1
FNLPEPAPPRPSL	13	Unmodified	_FNLPEPAPPRPSL_			0	0		O88935	O88935	O88935	Syn1	Synapsin-1	MULTI-MSMS	20230107_Microdroplet_Brain_BU_LongerGradient_250um	Brain_BU_LongerGradient_250um	718.394	2	717.891	1433.77	2.3525	0.0016889	0.031284	2.2459e-05	2.3838	0.0017113	717.89	18.447	1.1669	18.447	17.857	19.024	0					38	10	4	0	0	0	0.00014938	2	1995	151.1	103.9	1
FNSPYPKNYPPVVF	14	Unmodified	_FNSPYPKNYPPVVF_			0	0		P20917	P20917	P20917	Mag	Myelin-associated glycoprotein	MULTI-MSMS	20230107_Microdroplet_Brain_BU_LongerGradient_250um	Brain_BU_LongerGradient_250um	835.428	2	834.925	1667.83	1.6919	0.0014126	0.28193	0.00023539	1.9738	0.001648	835.427	19.637	1.3458	19.637	19.024	20.37	0					30	11	4	0	0	0	2.9253e-07	1	2085	189.57	156.82	1
FNVPYPLPKIDL	12	Unmodified	_FNVPYPLPKIDL_			0	0		Q11011	Q11011	Q11011	Npepps	Puromycin-sensitive aminopeptidase	MULTI-MSMS	20230107_Microdroplet_Brain_BU_LongerGradient_250um	Brain_BU_LongerGradient_250um	708.401	2	708.4	1414.79	2.1763	0.0015417	-0.24774	-0.0001755	1.9285	0.0013662	708.4	25.238	1.069	25.238	24.779	25.848	0					26	8	4	0	0	0	2.7205e-06	1	2592	187.99	140.81	1
FPYGDASKF	9	Unmodified	_FPYGDASKF_			0	0		Q8BGZ1;P62761;Q91X97;P84075;P62748	Q8BGZ1	Q8BGZ1	Hpcal4;Vsnl1;Ncald;Hpca;Hpcal1	Hippocalcin-like protein 4;Visinin-like protein 1;Neurocalcin-delta;Neuron-specific calcium-binding protein hippocalcin;Hippocalcin-like protein 1	MULTI-MSMS	20230107_Microdroplet_Brain_BU_LongerGradient_250um	Brain_BU_LongerGradient_250um	516.246	2	516.245	1030.48	1.9013	0.00098155	0.42704	0.00022045	2.3284	0.001202	516.245	7.8208	1.6652	7.8208	7.1373	8.8025	0					38	15	3	0	0	0	0.027216	2	820	87.308	19.132	1
FQLTHSLGGGTGSGM	15	Unmodified	_FQLTHSLGGGTGSGM_			0	0		P68372;P99024;Q7TMM9;Q9CWF2;Q922F4;Q9D6F9;Q9ERD7	P68372;P99024;Q7TMM9;Q922F4;Q9D6F9;Q9ERD7	P68372	Tubb4b;Tubb5;Tubb2a;Tubb2b;Tubb6;Tubb4a;Tubb3	Tubulin beta-4B chain;Tubulin beta-5 chain;Tubulin beta-2A chain;Tubulin beta-2B chain;Tubulin beta-6 chain;Tubulin beta-4A chain;Tubulin beta-3 chain	MULTI-MSMS	20230107_Microdroplet_Brain_BU_LongerGradient_250um	Brain_BU_LongerGradient_250um	725.344	2	725.343	1448.67	2.4022	0.0017424	-0.56477	-0.00040965	1.8375	0.0013328	725.343	10.663	1.9761	10.663	9.5258	11.502	0					68	17	5	0	0	0	1.8577e-24	3	1123	311.49	249.21	1
FQLTHSLGGGTGSGMG	16	Unmodified	_FQLTHSLGGGTGSGMG_			0	0		P68372;P99024;Q7TMM9;Q9CWF2;Q922F4;Q9D6F9;Q9ERD7	P68372;P99024;Q7TMM9;Q922F4;Q9D6F9;Q9ERD7	P68372	Tubb4b;Tubb5;Tubb2a;Tubb2b;Tubb6;Tubb4a;Tubb3	Tubulin beta-4B chain;Tubulin beta-5 chain;Tubulin beta-2A chain;Tubulin beta-2B chain;Tubulin beta-6 chain;Tubulin beta-4A chain;Tubulin beta-3 chain	MULTI-MSMS	20230107_Microdroplet_Brain_BU_LongerGradient_250um	Brain_BU_LongerGradient_250um	753.854	2	753.854	1505.69	2.0797	0.0015678	-0.71278	-0.00053733	1.3669	0.0010304	753.854	9.5509	1.8171	9.5509	8.5868	10.404	0					50	16	4	0	0	0	4.1193e-32	2	984	329.77	241.29	1
FQLTHSLGGGTGSGMGTL	18	Unmodified	_FQLTHSLGGGTGSGMGTL_			0	0		P68372;P99024;Q7TMM9;Q9CWF2;Q922F4;Q9D6F9;Q9ERD7	P68372;P99024;Q7TMM9;Q922F4;Q9D6F9;Q9ERD7	P68372	Tubb4b;Tubb5;Tubb2a;Tubb2b;Tubb6;Tubb4a;Tubb3	Tubulin beta-4B chain;Tubulin beta-5 chain;Tubulin beta-2A chain;Tubulin beta-2B chain;Tubulin beta-6 chain;Tubulin beta-4A chain;Tubulin beta-3 chain	MULTI-MSMS	20230107_Microdroplet_Brain_BU_LongerGradient_250um	Brain_BU_LongerGradient_250um	862.425	2	860.92	1719.83	1.7665	0.0015208	-0.28853	-0.0002484	1.478	0.0012724	860.92	16.564	1.6568	16.564	15.578	17.235	0					67	15	5	0	0	0	1.0277e-68	4	1741	461.32	357.1	1
FQLTHSLGGGTGSGMGTL	18	Oxidation (M)	_FQLTHSLGGGTGSGM(Oxidation (M))GTL_	FQLTHSLGGGTGSGM(1)GTL	FQLTHSLGGGTGSGM(160)GTL	0	1		P68372;P99024;Q7TMM9;Q9CWF2;Q922F4;Q9D6F9;Q9ERD7	P68372;P99024;Q7TMM9;Q922F4;Q9D6F9;Q9ERD7	P68372	Tubb4b;Tubb5;Tubb2a;Tubb2b;Tubb6;Tubb4a;Tubb3	Tubulin beta-4B chain;Tubulin beta-5 chain;Tubulin beta-2A chain;Tubulin beta-2B chain;Tubulin beta-6 chain;Tubulin beta-4A chain;Tubulin beta-3 chain	MULTI-MSMS	20230107_Microdroplet_Brain_BU_LongerGradient_250um	Brain_BU_LongerGradient_250um	869.417	2	868.917	1735.82	1.7382	0.0015104	-2.9729	-0.0025832	-1.2347	-0.0010728	869.415	16.547	0.71989	16.547	16.089	16.809	0					15	6	4	0	0	0	7.0921e-07	1	1766	157.28	120.43	1
FQLTHSLGGGTGSGMGTLL	19	Unmodified	_FQLTHSLGGGTGSGMGTLL_			0	0		P68372;P99024;Q7TMM9;Q9CWF2;Q922F4;Q9D6F9;Q9ERD7	P68372;P99024;Q7TMM9;Q922F4;Q9D6F9;Q9ERD7	P68372	Tubb4b;Tubb5;Tubb2a;Tubb2b;Tubb6;Tubb4a;Tubb3	Tubulin beta-4B chain;Tubulin beta-5 chain;Tubulin beta-2A chain;Tubulin beta-2B chain;Tubulin beta-6 chain;Tubulin beta-4A chain;Tubulin beta-3 chain	MULTI-MSMS	20230107_Microdroplet_Brain_BU_LongerGradient_250um	Brain_BU_LongerGradient_250um	918.967	2	917.462	1832.91	1.9567	0.0017952	-0.24125	-0.00022134	1.7154	0.0015738	917.462	20.032	2.2567	20.032	18.906	21.163	0					67	19	5	0	0	0	1.5103e-35	2	2124	409.75	353.52	1
FQLTHSLGGGTGSGMGTLL	19	Oxidation (M)	_FQLTHSLGGGTGSGM(Oxidation (M))GTLL_	FQLTHSLGGGTGSGM(1)GTLL	FQLTHSLGGGTGSGM(220)GTLL	0	1		P68372;P99024;Q7TMM9;Q9CWF2;Q922F4;Q9D6F9;Q9ERD7	P68372;P99024;Q7TMM9;Q922F4;Q9D6F9;Q9ERD7	P68372	Tubb4b;Tubb5;Tubb2a;Tubb2b;Tubb6;Tubb4a;Tubb3	Tubulin beta-4B chain;Tubulin beta-5 chain;Tubulin beta-2A chain;Tubulin beta-2B chain;Tubulin beta-6 chain;Tubulin beta-4A chain;Tubulin beta-3 chain	MULTI-SECPEP	20230107_Microdroplet_Brain_BU_LongerGradient_250um	Brain_BU_LongerGradient_250um	926.463	2	925.459	1848.9	2.0286	0.0018774	-1.3593	-0.0012579	0.66932	0.00061943	925.961	20.024	0.89804	20.024	19.693	20.591	0					10	7	2	0	0	0	4.5398e-16	1	2127	223.06	161.63	1
FQMTFHL	7	Unmodified	_FQMTFHL_			0	0		P60202	P60202	P60202	Plp1	Myelin proteolipid protein	MULTI-MSMS	20230107_Microdroplet_Brain_BU_LongerGradient_250um	Brain_BU_LongerGradient_250um	462.227	2	462.226	922.437	2.5656	0.0011859	-0.28564	-0.00013203	2.28	0.0010539	462.226	17.918	1.677	17.918	17.347	19.024	0					42	15	4	0	0	0	0.001142	1	1948	174.64	102.69	1
FQMTFHL	7	Oxidation (M)	_FQM(Oxidation (M))TFHL_	FQM(1)TFHL	FQM(96)TFHL	0	1		P60202	P60202	P60202	Plp1	Myelin proteolipid protein	MULTI-SECPEP	20230107_Microdroplet_Brain_BU_LongerGradient_250um	Brain_BU_LongerGradient_250um	470.935	2	470.223	938.432	2.8464	0.0013384	-0.34912	-0.00016416	2.4973	0.0011743	470.223	17.957	1.1539	17.957	17.451	18.605	0					13	10	2	0	0	0	0.017834	1	1929	95.62	41.05	1
FQTNLVPYPRIHF	13	Unmodified	_FQTNLVPYPRIHF_			0	0		P68373;P68369;P05213;P05214;Q9JJZ2;Q3UX10	P68373;Q3UX10	P68373	Tuba1c;Tuba1a;Tuba1b;Tuba3a;Tuba8;Tubal3	Tubulin alpha-1C chain;Tubulin alpha-1A chain;Tubulin alpha-1B chain;Tubulin alpha-3 chain;Tubulin alpha-8 chain;Tubulin alpha chain-like 3	MULTI-MSMS	20230107_Microdroplet_Brain_BU_LongerGradient_250um	Brain_BU_LongerGradient_250um	544.629	3	544.628	1630.86	2.4546	0.0013369	-0.14063	-7.6591e-05	2.314	0.0012603	544.628	20.724	1.4872	20.724	20.139	21.626	0					60	12	6	0	0	0	3.8026e-06	2	2223	176.51	133.72	1
FQTNLVPYPRIHF	13	Unmodified	_FQTNLVPYPRIHF_			0	0		P68373;P68369;P05213;P05214;Q9JJZ2;Q3UX10	P68373;Q3UX10	P68373	Tuba1c;Tuba1a;Tuba1b;Tuba3a;Tuba8;Tubal3	Tubulin alpha-1C chain;Tubulin alpha-1A chain;Tubulin alpha-1B chain;Tubulin alpha-3 chain;Tubulin alpha-8 chain;Tubulin alpha chain-like 3	MULTI-MSMS	20230107_Microdroplet_Brain_BU_LongerGradient_250um	Brain_BU_LongerGradient_250um	816.941	2	816.438	1630.86	2.3302	0.0019025	0.29264	0.00023893	2.6229	0.0021414	816.438	20.702	1.3725	20.702	20.139	21.512	0					34	11	4	0	0	0	3.5305e-06	1	2180	212.82	148	1
FQTNLVPYPRIHFPITAL	18	Unmodified	_FQTNLVPYPRIHFPITAL_			0	0		Q3UX10	Q3UX10	Q3UX10	Tubal3	Tubulin alpha chain-like 3	MULTI-MSMS	20230107_Microdroplet_Brain_BU_LongerGradient_250um	Brain_BU_LongerGradient_250um	710.065	3	709.73	2126.17	1.8103	0.0012848	-0.23859	-0.00016934	1.5717	0.0011155	710.064	26.528	1.0708	26.528	25.848	26.919	0					19	8	3	0	0	0	0.0015022	1	2732	113.29	71.875	1
FQTNLVPYPRIHFPLA	16	Unmodified	_FQTNLVPYPRIHFPLA_			0	0		P68373;P68369;P05213;P05214	P68373	P68373	Tuba1c;Tuba1a;Tuba1b;Tuba3a	Tubulin alpha-1C chain;Tubulin alpha-1A chain;Tubulin alpha-1B chain;Tubulin alpha-3 chain	MULTI-MSMS	20230107_Microdroplet_Brain_BU_LongerGradient_250um	Brain_BU_LongerGradient_250um	638.688	3	638.353	1912.04	2.2827	0.0014572	-0.3206	-0.00020466	1.9621	0.0012525	638.687	24.102	1.6361	24.102	23.262	24.898	0					38	13	4	0	0	0	2.2368e-07	1	2489	188.63	159.61	1
FQTNLVPYPRIHFPLAT	17	Unmodified	_FQTNLVPYPRIHFPLAT_			0	0		P68373;P68369;P05213;P05214	P68373	P68373	Tuba1c;Tuba1a;Tuba1b;Tuba3a	Tubulin alpha-1C chain;Tubulin alpha-1A chain;Tubulin alpha-1B chain;Tubulin alpha-3 chain	MULTI-MSMS	20230107_Microdroplet_Brain_BU_LongerGradient_250um	Brain_BU_LongerGradient_250um	673.039	3	672.035	2013.08	2.2066	0.0014829	0.27357	0.00018385	2.4802	0.0016668	672.37	23.562	2.9413	23.562	23.145	26.086	0					105	24	7	0	0	0	4.7967e-24	3	2454	229.92	20.111	1
FQTNLVPYPRIHFPLAT	17	Unmodified	_FQTNLVPYPRIHFPLAT_			0	0		P68373;P68369;P05213;P05214	P68373	P68373	Tuba1c;Tuba1a;Tuba1b;Tuba3a	Tubulin alpha-1C chain;Tubulin alpha-1A chain;Tubulin alpha-1B chain;Tubulin alpha-3 chain	MULTI-MSMS	20230107_Microdroplet_Brain_BU_LongerGradient_250um	Brain_BU_LongerGradient_250um	1008.05	2	1007.55	2013.08	1.9584	0.0019732	0.07562	7.6191e-05	2.034	0.0020494	1008.05	23.603	1.168	23.603	23.379	24.547	0					34	9	5	0	0	0	5.5666e-17	1	2457	242.43	14.954	1
FQYDSTHGKFNGTVKAENGKL	21	Unmodified	_FQYDSTHGKFNGTVKAENGKL_			0	0		P16858	P16858	P16858	Gapdh	Glyceraldehyde-3-phosphate dehydrogenase	MULTI-MSMS	20230107_Microdroplet_Brain_BU_LongerGradient_250um	Brain_BU_LongerGradient_250um	586.297	4	586.045	2340.15	2.1392	0.0012536	-0.81749	-0.00047908	1.3217	0.00077456	586.294	5.0596	0.96413	5.0596	4.7788	5.7429	0					42	13	4	0	0	0	0.021097	1	485	81.665	46.026	1
FRDPFRKDPNKLVL	14	Unmodified	_FRDPFRKDPNKLVL_			0	0		P15105	P15105	P15105	Glul	Glutamine synthetase	MULTI-MSMS	20230107_Microdroplet_Brain_BU_LongerGradient_250um	Brain_BU_LongerGradient_250um	437.003	4	437.002	1743.98	1.9358	0.00084594	-0.32281	-0.00014107	1.613	0.00070487	437.002	8.9027	2.7501	8.9027	7.762	10.512	0					87	25	5	0	0	0	0.023584	1	947	89.507	44.391	1
FRIPWFQY	8	Unmodified	_FRIPWFQY_			0	0		O35129	O35129	O35129	Phb2	Prohibitin-2	MULTI-MSMS	20230107_Microdroplet_Brain_BU_LongerGradient_250um	Brain_BU_LongerGradient_250um	578.802	2	578.801	1155.59	1.8632	0.0010784	0.4094	0.00023696	2.2726	0.0013154	578.801	23.958	1.054	23.958	23.609	24.663	0					14	8	3	0	0	0	0.001605	1	2503	149.4	101.55	1
FRKFLPLF	8	Unmodified	_FRKFLPLF_			0	0		Q64433	Q64433	Q64433	Hspe1	10 kDa heat shock protein, mitochondrial	MULTI-MSMS	20230107_Microdroplet_Brain_BU_LongerGradient_250um	Brain_BU_LongerGradient_250um	534.325	2	534.324	1066.63	2.0086	0.0010732	-0.036391	-1.9445e-05	1.9722	0.0010538	534.324	18.472	1.3718	18.472	17.857	19.229	0					29	12	3	0	0	0	0.032233	1	1971	95.793	28.052	1
FRLLGNM	7	Unmodified	_FRLLGNM_			0	0		P02088	P02088	P02088	Hbb-b1	Hemoglobin subunit beta-1	MULTI-MSMS	20230107_Microdroplet_Brain_BU_LongerGradient_250um	Brain_BU_LongerGradient_250um	425.735	2	425.734	849.453	2.2599	0.00096213	-0.36785	-0.00015661	1.8921	0.00080552	425.734	12.114	2.1819	12.114	11.052	13.234	0					51	19	4	0	0	0	0.0098448	1	1299	117.7	55.702	1
FRLPRPPPPEM	11	Unmodified	_FRLPRPPPPEM_			0	0		Q8VEM8	Q8VEM8	Q8VEM8	Slc25a3	Phosphate carrier protein, mitochondrial	MSMS	20230107_Microdroplet_Brain_BU_LongerGradient_250um	Brain_BU_LongerGradient_250um	668.864	2	668.863	1335.71	NaN	NaN	NaN	NaN	NaN	NaN	NaN	13.89	1	13.89	13.39	14.39	0								0	0	0	0.042083	1	1473	76.17	43.85	1
FRLPRPPPPEMPESLKKKLGLTE	23	Unmodified	_FRLPRPPPPEMPESLKKKLGLTE_			0	0		Q8VEM8	Q8VEM8	Q8VEM8	Slc25a3	Phosphate carrier protein, mitochondrial	MULTI-MSMS	20230107_Microdroplet_Brain_BU_LongerGradient_250um	Brain_BU_LongerGradient_250um	533.106	5	532.905	2659.49	1.4605	0.00077833	0.38573	0.00020556	1.8463	0.00098388	533.106	19.338	0.89715	19.338	18.906	19.804	0					21	7	3	0	0	0	0.021871	1	2064	74.584	46.172	1
FRPWDVTKL	9	Unmodified	_FRPWDVTKL_			0	0		Q02053	Q02053	Q02053	Uba1	Ubiquitin-like modifier-activating enzyme 1	MSMS	20230107_Microdroplet_Brain_BU_LongerGradient_250um	Brain_BU_LongerGradient_250um	387.886	3	387.885	1160.63	NaN	NaN	NaN	NaN	NaN	NaN	NaN	15.465	1	15.465	14.965	15.965	0								0	0	0	0.0009542	1	1644	119.22	41.075	1
FRSTSGPGMPMNWPQF	16	Unmodified	_FRSTSGPGMPMNWPQF_			0	0		Q61644	Q61644	Q61644	Pacsin1	Protein kinase C and casein kinase substrate in neurons protein 1	MULTI-MSMS	20230107_Microdroplet_Brain_BU_LongerGradient_250um	Brain_BU_LongerGradient_250um	920.923	2	920.419	1838.82	2.2257	0.0020485	-0.7498	-0.00069013	1.4759	0.0013584	920.921	20.905	0.9181	20.905	20.708	21.626	0					27	7	5	0	0	0	4.3822e-11	1	2205	210.41	145.59	1
FRVPTPNVS	9	Unmodified	_FRVPTPNVS_			0	0		P16858;Q64467	P16858	P16858	Gapdh;Gapdhs	Glyceraldehyde-3-phosphate dehydrogenase;Glyceraldehyde-3-phosphate dehydrogenase, testis-specific	MULTI-MSMS	20230107_Microdroplet_Brain_BU_LongerGradient_250um	Brain_BU_LongerGradient_250um	510.283	2	508.78	1015.55	2.0317	0.0010337	-0.80449	-0.00040931	1.2273	0.0006244	508.78	9.5229	3.7388	9.5229	7.6573	11.396	0					112	34	4	0	0	0	0.0085053	3	1043	110.38	60.726	1
FRVPTPNVSV	10	Unmodified	_FRVPTPNVSV_			0	0		P16858;Q64467	P16858	P16858	Gapdh;Gapdhs	Glyceraldehyde-3-phosphate dehydrogenase;Glyceraldehyde-3-phosphate dehydrogenase, testis-specific	MULTI-MSMS	20230107_Microdroplet_Brain_BU_LongerGradient_250um	Brain_BU_LongerGradient_250um	558.315	2	558.314	1114.61	2.1668	0.0012098	0.1451	8.1014e-05	2.3119	0.0012908	558.314	16.252	2.3517	16.252	14.995	17.347	0					72	22	4	0	0	0	0.0020464	2	1739	131.44	57.664	1
FSDYPPLGRF	10	Unmodified	_FSDYPPLGRF_			0	0		P10126	P10126	P10126	Eef1a1	Elongation factor 1-alpha 1	MULTI-MSMS	20230107_Microdroplet_Brain_BU_LongerGradient_250um	Brain_BU_LongerGradient_250um	599.799	2	599.798	1197.58	2.05	0.0012296	-0.50849	-0.00030499	1.5415	0.00092459	599.798	16.409	1.3502	16.409	15.774	17.124	0					31	12	4	0	0	0	0.01969	1	1720	94.309	51.227	1
FSETGAGKHVPRAVF	15	Unmodified	_FSETGAGKHVPRAVF_			0	0		P68373;P68369;P05213;P05214	P68373	P68373	Tuba1c;Tuba1a;Tuba1b;Tuba3a	Tubulin alpha-1C chain;Tubulin alpha-1A chain;Tubulin alpha-1B chain;Tubulin alpha-3 chain	MULTI-MSMS	20230107_Microdroplet_Brain_BU_LongerGradient_250um	Brain_BU_LongerGradient_250um	535.621	3	534.951	1601.83	2.1389	0.0011442	0.69343	0.00037095	2.8323	0.0015152	534.951	5.1786	1.4374	5.1786	4.635	6.0724	0					56	19	5	0	0	0	0.016382	1	487	79.022	31.833	1
FSETGAGKHVPRAVF	15	Unmodified	_FSETGAGKHVPRAVF_			0	0		P68373;P68369;P05213;P05214	P68373	P68373	Tuba1c;Tuba1a;Tuba1b;Tuba3a	Tubulin alpha-1C chain;Tubulin alpha-1A chain;Tubulin alpha-1B chain;Tubulin alpha-3 chain	MULTI-MSMS	20230107_Microdroplet_Brain_BU_LongerGradient_250um	Brain_BU_LongerGradient_250um	401.466	4	401.465	1601.83	2.1006	0.00084332	0.37698	0.00015135	2.4776	0.00099467	401.465	5.2589	1.2262	5.2589	4.7788	6.005	0					49	16	5	0	0	0	0.00030432	1	496	116.96	82.575	1
FSGDRGAPKRGSGKDSHTRTTHYGSLPQKSQHGRTQDEN	39	Unmodified	_FSGDRGAPKRGSGKDSHTRTTHYGSLPQKSQHGRTQDEN_			0	0		P04370	P04370	P04370	Mbp	Myelin basic protein	MULTI-MSMS	20230107_Microdroplet_Brain_BU_LongerGradient_250um	Brain_BU_LongerGradient_250um	714.687	6	714.35	4280.06	2.2095	0.0015783	0.23916	0.00017085	2.4486	0.0017492	714.851	3.0517	1.5243	3.0517	2.2641	3.7884	0					118	33	5	0	0	0	0.007054	1	266	100.33	79.754	1
FSGDRGAPKRGSGKDSHTRTTHYGSLPQKSQHGRTQDENPVVHF	44	Unmodified	_FSGDRGAPKRGSGKDSHTRTTHYGSLPQKSQHGRTQDENPVVHF_			0	0		P04370	P04370	P04370	Mbp	Myelin basic protein	MULTI-MSMS	20230107_Microdroplet_Brain_BU_LongerGradient_250um	Brain_BU_LongerGradient_250um	811.403	6	810.903	4859.37	2.178	0.0017661	-0.67468	-0.0005471	1.5033	0.001219	811.07	4.7509	0.96651	4.7509	3.9917	4.9583	0					33	10	7	0	0	0	0.014459	1	461	85.751	69.141	1
FSKVKQLPLVKPYL	14	Unmodified	_FSKVKQLPLVKPYL_			0	0		Q68FD5	Q68FD5	Q68FD5	Cltc	Clathrin heavy chain 1	MULTI-MSMS	20230107_Microdroplet_Brain_BU_LongerGradient_250um	Brain_BU_LongerGradient_250um	554.346	3	554.011	1659.01	2.1585	0.0011958	0.16909	9.3679e-05	2.3276	0.0012895	554.011	14.778	1.7338	14.778	13.949	15.683	0					60	16	5	0	0	0	1.5524e-06	1	1534	167.32	143.84	1
FSKVKQLPLVKPYL	14	Unmodified	_FSKVKQLPLVKPYL_			0	0		Q68FD5	Q68FD5	Q68FD5	Cltc	Clathrin heavy chain 1	MULTI-MSMS	20230107_Microdroplet_Brain_BU_LongerGradient_250um	Brain_BU_LongerGradient_250um	415.761	4	415.76	1659.01	1.8944	0.00078763	0.30427	0.0001265	2.1987	0.00091414	416.011	14.702	1.42	14.702	14.051	15.471	0					33	13	3	0	0	0	0.018073	2	1600	95.651	57.281	1
FSTTIHVPNIATGEQL	16	Unmodified	_FSTTIHVPNIATGEQL_			0	0		P46460	P46460	P46460	Nsf	Vesicle-fusing ATPase	MULTI-SECPEP	20230107_Microdroplet_Brain_BU_LongerGradient_250um	Brain_BU_LongerGradient_250um	864.435	2	864.452	1726.89	1.9917	0.0017218	0.61881	0.00053493	2.6105	0.0022567	864.953	20.258	1.3632	20.258	19.46	20.823	0					31	11	4	0	0	0	0.010365	1	2115	93.348	41.507	1
FSVMPSPKVSD	11	Unmodified	_FSVMPSPKVSD_			0	0		Q7TMM9;Q9CWF2;Q922F4;A2AQ07	Q7TMM9;Q922F4	Q7TMM9	Tubb2a;Tubb2b;Tubb6;Tubb1	Tubulin beta-2A chain;Tubulin beta-2B chain;Tubulin beta-6 chain;Tubulin beta-1 chain	MULTI-MSMS	20230107_Microdroplet_Brain_BU_LongerGradient_250um	Brain_BU_LongerGradient_250um	597.299	2	597.297	1192.58	2.1369	0.0012764	-0.13581	-8.112e-05	2.0011	0.0011953	597.297	8.9186	2.1122	8.9186	8.0697	10.182	0					31	19	2	0	0	0	0.0021789	1	959	121.83	78.747	1
FSVMPSPKVSDT	12	Unmodified	_FSVMPSPKVSDT_			0	0		Q7TMM9;Q9CWF2;Q922F4;A2AQ07	Q7TMM9;Q922F4	Q7TMM9	Tubb2a;Tubb2b;Tubb6;Tubb1	Tubulin beta-2A chain;Tubulin beta-2B chain;Tubulin beta-6 chain;Tubulin beta-1 chain	MULTI-MSMS	20230107_Microdroplet_Brain_BU_LongerGradient_250um	Brain_BU_LongerGradient_250um	647.823	2	647.821	1293.63	2.2713	0.0014714	1.3804	0.00089428	3.6517	0.0023657	647.821	9.7871	1.8281	9.7871	8.9019	10.73	0					36	16	3	0	0	0	0.0017613	1	1037	121.36	50.018	1
FSVVPSPKVSD	11	Unmodified	_FSVVPSPKVSD_			0	0		P68372;P99024;Q9D6F9;Q9ERD7	P68372;P99024;Q9D6F9;Q9ERD7	P68372	Tubb4b;Tubb5;Tubb4a;Tubb3	Tubulin beta-4B chain;Tubulin beta-5 chain;Tubulin beta-4A chain;Tubulin beta-3 chain	MULTI-MSMS	20230107_Microdroplet_Brain_BU_LongerGradient_250um	Brain_BU_LongerGradient_250um	581.312	2	581.311	1160.61	1.9726	0.0011467	-0.11716	-6.8106e-05	1.8554	0.0010786	581.311	8.3222	2.6356	8.3222	7.3353	9.9709	0					58	24	4	0	0	0	0.016244	2	970	98.048	55.939	1
FSVVPSPKVSDT	12	Unmodified	_FSVVPSPKVSDT_			0	0		P68372;P99024;Q9D6F9;Q9ERD7	P68372;P99024;Q9D6F9;Q9ERD7	P68372	Tubb4b;Tubb5;Tubb4a;Tubb3	Tubulin beta-4B chain;Tubulin beta-5 chain;Tubulin beta-4A chain;Tubulin beta-3 chain	MULTI-MSMS	20230107_Microdroplet_Brain_BU_LongerGradient_250um	Brain_BU_LongerGradient_250um	631.835	2	631.835	1261.66	2.2027	0.0013918	1.063	0.00067165	3.2657	0.0020634	631.835	9.1076	3.2763	9.1076	7.2358	10.512	0					106	30	5	0	0	0	0.0002333	2	1003	150.46	81.722	1
FSYGRALQA	9	Unmodified	_FSYGRALQA_			0	0		P05064;Q91Y97;P05063	P05064;P05063	P05064	Aldoa;Aldob;Aldoc	Fructose-bisphosphate aldolase A;Fructose-bisphosphate aldolase B;Fructose-bisphosphate aldolase C	MULTI-MSMS	20230107_Microdroplet_Brain_BU_LongerGradient_250um	Brain_BU_LongerGradient_250um	506.763	2	506.764	1011.51	2.225	0.0011275	-0.93548	-0.00047407	1.2895	0.00065348	506.764	5.8664	1.4613	5.8664	5.3052	6.7665	0					30	17	2	0	0	0	0.03323	1	599	79.893	19.534	1
FSYTDANKNKGITWGED	17	Unmodified	_FSYTDANKNKGITWGED_			0	0		P62897	P62897	P62897	Cycs	Cytochrome c, somatic	MULTI-MSMS	20230107_Microdroplet_Brain_BU_LongerGradient_250um	Brain_BU_LongerGradient_250um	649.302	3	649.302	1944.89	2.1735	0.0014113	-0.58856	-0.00038215	1.585	0.0010291	649.302	8.975	1.3708	8.975	8.3756	9.7464	0					27	12	3	0	0	0	0.032319	1	972	74.786	45.295	1
FTFKVPYSEL	10	Unmodified	_FTFKVPYSEL_			0	0		P46096	P46096	P46096	Syt1	Synaptotagmin-1	MULTI-MSMS	20230107_Microdroplet_Brain_BU_LongerGradient_250um	Brain_BU_LongerGradient_250um	615.825	2	615.824	1229.63	2.5197	0.0015517	0.055787	3.4355e-05	2.5755	0.0015861	615.824	20.692	2.1669	20.692	19.345	21.512	0					37	18	4	0	0	0	5.2979e-07	1	2176	202.44	148.28	1
FTLPGTPVF	9	Unmodified	_FTLPGTPVF_			0	0		P10852	P10852	P10852	Slc3a2	4F2 cell-surface antigen heavy chain	MSMS	20230107_Microdroplet_Brain_BU_LongerGradient_250um	Brain_BU_LongerGradient_250um	489.769	2	489.768	977.522	NaN	NaN	NaN	NaN	NaN	NaN	NaN	22.069	1	22.069	21.569	22.569	0								0	0	0	0.0015079	1	2314	105.12	30.781	1
FTVIFDTGSSNL	12	Unmodified	_FTVIFDTGSSNL_			0	0		P00791;P70269	P00791	P00791	Ctse	Cathepsin E	MULTI-MSMS	20230107_Microdroplet_Brain_BU_LongerGradient_250um	Brain_BU_LongerGradient_250um	650.825	2	650.825	1299.63	2.4931	0.0016225	0.32592	0.00021211	2.819	0.0018347	650.824	20.507	0.68352	20.507	20.139	20.823	0					13	5	3	0	0	0	2.5225e-06	1	2169	188.49	119.86	1
FVHWFPLF	8	Unmodified	_FVHWFPLF_			0	0		P00397	P00397	P00397	Mtco1	Cytochrome c oxidase subunit 1	MULTI-MSMS	20230107_Microdroplet_Brain_BU_LongerGradient_250um	Brain_BU_LongerGradient_250um	547.791	2	546.787	1091.56	1.7585	0.00096155	-0.17675	-9.6642e-05	1.5818	0.00086491	546.787	26.507	2.3683	26.507	25.729	28.097	0					36	19	4	0	0	0	0.003575	1	2734	136.94	98.705	1
FVPAPWL	7	Unmodified	_FVPAPWL_			0	0		P17426;P17427	P17426;P17427	P17426	Ap2a1;Ap2a2	AP-2 complex subunit alpha-1;AP-2 complex subunit alpha-2	MULTI-MSMS	20230107_Microdroplet_Brain_BU_LongerGradient_250um	Brain_BU_LongerGradient_250um	415.235	2	415.234	828.453	2.1358	0.00088684	-0.09511	-3.9493e-05	2.0407	0.00084735	415.234	20.734	1.4872	20.734	20.139	21.626	0					23	12	3	0	0	0	0.0089756	1	2182	121.92	64.209	1
FWSRVNIPKVL	11	Unmodified	_FWSRVNIPKVL_			0	0		Q68FD5	Q68FD5	Q68FD5	Cltc	Clathrin heavy chain 1	MULTI-MSMS	20230107_Microdroplet_Brain_BU_LongerGradient_250um	Brain_BU_LongerGradient_250um	453.604	3	453.603	1357.79	1.9633	0.00089056	-0.043187	-1.959e-05	1.9201	0.00087097	453.603	18.75	1.5064	18.75	18.07	19.577	0					35	13	4	0	0	0	0.0023161	1	1986	119.74	80.869	1
FWSRVNIPKVLRA	13	Unmodified	_FWSRVNIPKVLRA_			0	0		Q68FD5	Q68FD5	Q68FD5	Cltc	Clathrin heavy chain 1	MULTI-MSMS	20230107_Microdroplet_Brain_BU_LongerGradient_250um	Brain_BU_LongerGradient_250um	397.49	4	397.239	1584.93	2.0182	0.0008017	0.24804	9.8532e-05	2.2662	0.00090024	397.489	15.762	1.0481	15.762	15.359	16.407	0					22	9	3	0	0	0	0.02254	1	1704	90.759	55.555	1
FYKGIRPAIN	10	Unmodified	_FYKGIRPAIN_			0	0		Q03265	Q03265	Q03265	Atp5a1	ATP synthase subunit alpha, mitochondrial	MULTI-MSMS	20230107_Microdroplet_Brain_BU_LongerGradient_250um	Brain_BU_LongerGradient_250um	589.838	2	589.838	1177.66	2.2247	0.0013122	-0.22247	-0.00013122	2.0022	0.001181	589.837	5.1926	0.4964	5.1926	4.9583	5.4547	0					11	6	2	0	0	0	0.026304	1	522	86.095	40.377	1
FYKGVAPLW	9	Unmodified	_FYKGVAPLW_			0	0		Q8VEM8	Q8VEM8	Q8VEM8	Slc25a3	Phosphate carrier protein, mitochondrial	MULTI-MSMS	20230107_Microdroplet_Brain_BU_LongerGradient_250um	Brain_BU_LongerGradient_250um	540.799	2	540.797	1079.58	1.9523	0.0010558	0.54099	0.00029257	2.4933	0.0013483	540.798	16.543	1.6568	16.543	15.578	17.235	0					38	15	4	0	0	0	0.0042093	1	1745	122.79	86.234	1
GASGGIGQPLSL	12	Unmodified	_GASGGIGQPLSL_			0	0		P08249	P08249	P08249	Mdh2	Malate dehydrogenase, mitochondrial	MULTI-MSMS	20230107_Microdroplet_Brain_BU_LongerGradient_250um	Brain_BU_LongerGradient_250um	528.789	2	528.788	1055.56	2.236	0.0011824	0.20397	0.00010785	2.4399	0.0012902	528.788	12.661	1.3806	12.661	12.167	13.548	0					33	12	3	0	0	0	0.012338	1	1356	102.52	38.039	1
GDQALSFLKDFLAGGIAAAVSKTAVAPIERVKLLL	35	Acetyl (N-term)	_(Acetyl (N-term))GDQALSFLKDFLAGGIAAAVSKTAVAPIERVKLLL_			1	0		P48962	P48962	P48962	Slc25a4	ADP/ATP translocase 1	MULTI-MSMS	20230107_Microdroplet_Brain_BU_LongerGradient_250um	Brain_BU_LongerGradient_250um	907.275	4	907.024	3624.07	1.6079	0.0014584	-0.12919	-0.00011718	1.4787	0.0013412	907.525	33.768	1.5042	33.768	33.466	34.97	0					55	13	6	0	0	0	1.5237e-22	2	3453	249.14	233.86	1
GFIPEIIF	8	Unmodified	_GFIPEIIF_			0	0		Q9Z1G4	Q9Z1G4	Q9Z1G4	Atp6v0a1	V-type proton ATPase 116 kDa subunit a isoform 1	MULTI-MSMS	20230107_Microdroplet_Brain_BU_LongerGradient_250um	Brain_BU_LongerGradient_250um	468.267	2	468.265	934.516	2.0482	0.00095908	-0.5159	-0.00024158	1.5323	0.00071751	468.265	26.85	0.83185	26.85	26.324	27.156	0					14	6	3	0	0	0	0.0040425	1	2744	133.99	42.404	1
GLAYPSISASGATPVFDNL	19	Unmodified	_GLAYPSISASGATPVFDNL_			0	0		P00791	P00791	P00791			MULTI-MSMS	20230107_Microdroplet_Brain_BU_LongerGradient_250um	Brain_BU_LongerGradient_250um	940.979	2	940.475	1878.94	2.0891	0.0019648	0.1903	0.00017897	2.2794	0.0021437	940.977	23.557	1.0492	23.557	23.379	24.428	0					26	8	4	0	0	0	4.1013e-18	1	2463	252.37	200.39	1
GLMPPLPFF	9	Unmodified	_GLMPPLPFF_			0	0		Q8K0T0	Q8K0T0	Q8K0T0	Rtn1	Reticulon-1	MSMS	20230107_Microdroplet_Brain_BU_LongerGradient_250um	Brain_BU_LongerGradient_250um	509.775	2	509.775	1017.54	NaN	NaN	NaN	NaN	NaN	NaN	NaN	28.991	1	28.991	28.491	29.491	0								0	0	0	0.043253	1	2959	58.551	21.995	1
GMTHRTFIPYPLPLF	15	Unmodified	_GMTHRTFIPYPLPLF_			0	0		Q9DC69	Q9DC69	Q9DC69	Ndufa9	NADH dehydrogenase [ubiquinone] 1 alpha subcomplex subunit 9, mitochondrial	MULTI-MSMS	20230107_Microdroplet_Brain_BU_LongerGradient_250um	Brain_BU_LongerGradient_250um	895.48	2	895.477	1788.94	1.5936	0.001427	-0.48632	-0.00043549	1.1073	0.00099155	895.476	25.452	0.95016	25.452	25.017	25.967	0					15	7	4	0	0	0	0.00087603	1	2639	121.08	76.311	1
GMTHRTFIPYPLPLF	15	Unmodified	_GMTHRTFIPYPLPLF_			0	0		Q9DC69	Q9DC69	Q9DC69	Ndufa9	NADH dehydrogenase [ubiquinone] 1 alpha subcomplex subunit 9, mitochondrial	MULTI-MSMS	20230107_Microdroplet_Brain_BU_LongerGradient_250um	Brain_BU_LongerGradient_250um	597.656	3	597.32	1788.94	1.8941	0.0011314	-0.21359	-0.00012758	1.6805	0.0010038	597.654	25.47	1.3069	25.47	24.779	26.086	0					23	10	3	0	0	0	0.010716	1	2641	84.566	45.562	1
GRIMNVIGEPIDE	13	Unmodified	_GRIMNVIGEPIDE_			0	0		P56480	P56480	P56480	Atp5b	ATP synthase subunit beta, mitochondrial	MULTI-MSMS	20230107_Microdroplet_Brain_BU_LongerGradient_250um	Brain_BU_LongerGradient_250um	721.872	2	721.869	1441.72	2.1178	0.0015288	-0.19092	-0.00013782	1.9269	0.001391	721.869	14.497	1.3333	14.497	13.759	15.092	0					30	12	3	0	0	0	0.014763	1	1509	99.568	64.344	1
GRIPSAVGYQPTL	13	Unmodified	_GRIPSAVGYQPTL_			0	0		P56480	P56480	P56480	Atp5b	ATP synthase subunit beta, mitochondrial	MULTI-MSMS	20230107_Microdroplet_Brain_BU_LongerGradient_250um	Brain_BU_LongerGradient_250um	679.876	2	679.875	1357.74	1.9481	0.0013245	-0.66527	-0.0004523	1.2828	0.00087217	679.874	13.634	1.7617	13.634	12.499	14.261	0					33	16	3	0	0	0	0.0032193	1	1421	112.64	51.672	1
GRVAVSADPNVPNVIV	16	Unmodified	_GRVAVSADPNVPNVIV_			0	0		Q99PT1	Q99PT1	Q99PT1	Arhgdia	Rho GDP-dissociation inhibitor 1	MULTI-MSMS	20230107_Microdroplet_Brain_BU_LongerGradient_250um	Brain_BU_LongerGradient_250um	804.452	2	803.949	1605.88	2.0394	0.0016396	0.30708	0.00024688	2.3465	0.0018865	804.451	16.416	0.84202	16.416	15.774	16.616	0					14	7	2	0	0	0	0.021159	1	1733	89.959	44.822	1
GVIPSTPLAIHTPLMPNQ	18	Unmodified	_GVIPSTPLAIHTPLMPNQ_			0	0		Q9DBG3	Q9DBG3	Q9DBG3	Ap2b1	AP-2 complex subunit beta	MULTI-MSMS	20230107_Microdroplet_Brain_BU_LongerGradient_250um	Brain_BU_LongerGradient_250um	944.016	2	943.514	1885.01	2.6479	0.0024983	0.20251	0.00019107	2.8504	0.0026894	943.514	22.534	0.93875	22.534	22.087	23.026	0					22	7	4	0	0	0	0.00017913	1	2374	142.91	89.981	1
GVLPWNAF	8	Unmodified	_GVLPWNAF_			0	0		P60202	P60202	P60202	Plp1	Myelin proteolipid protein	MULTI-MSMS	20230107_Microdroplet_Brain_BU_LongerGradient_250um	Brain_BU_LongerGradient_250um	452.24	2	452.24	902.465	1.7611	0.00079642	0.015852	7.1689e-06	1.7769	0.00080359	452.24	21.681	1.158	21.681	21.047	22.205	0					22	9	3	0	0	0	0.00083107	1	2256	154.29	94.651	1
GYALPHAIL	9	Unmodified	_GYALPHAIL_			0	0		P63260;P60710;Q8BFZ3	P63260	P63260	Actg1;Actb;Actbl2	Actin, cytoplasmic 2;Actin, cytoplasmic 2, N-terminally processed;Actin, cytoplasmic 1;Actin, cytoplasmic 1, N-terminally processed;Beta-actin-like protein 2	MULTI-MSMS	20230107_Microdroplet_Brain_BU_LongerGradient_250um	Brain_BU_LongerGradient_250um	477.775	2	477.774	953.533	2.3795	0.0011369	0.39268	0.00018761	2.7722	0.0013245	477.774	15.207	1.1119	15.207	14.571	15.683	0					25	10	3	0	0	0	0.0018892	1	1604	142.27	94.423	1
HFFMPGF	7	Unmodified	_HFFMPGF_			0	0		P68372;P99024;Q7TMM9;Q9CWF2;Q922F4;A2AQ07;Q9D6F9;Q9ERD7	P68372;P99024;Q7TMM9;Q922F4;Q9D6F9;Q9ERD7	P68372	Tubb4b;Tubb5;Tubb2a;Tubb2b;Tubb6;Tubb1;Tubb4a;Tubb3	Tubulin beta-4B chain;Tubulin beta-5 chain;Tubulin beta-2A chain;Tubulin beta-2B chain;Tubulin beta-6 chain;Tubulin beta-1 chain;Tubulin beta-4A chain;Tubulin beta-3 chain	MULTI-MSMS	20230107_Microdroplet_Brain_BU_LongerGradient_250um	Brain_BU_LongerGradient_250um	441.703	2	441.702	881.389	2.0622	0.00091088	0.16245	7.1753e-05	2.2247	0.00098264	441.702	17.702	1.3738	17.702	17.124	18.498	0					27	12	3	0	0	0	0.021771	1	1869	102.87	40.154	1
HFFMPGFAPLTA	12	Unmodified	_HFFMPGFAPLTA_			0	0		Q922F4;A2AQ07;Q9ERD7	Q922F4;Q9ERD7	Q922F4	Tubb6;Tubb1;Tubb3	Tubulin beta-6 chain;Tubulin beta-1 chain;Tubulin beta-3 chain	MULTI-MSMS	20230107_Microdroplet_Brain_BU_LongerGradient_250um	Brain_BU_LongerGradient_250um	668.332	2	668.331	1334.65	2.9635	0.0019806	-1.107	-0.00073985	1.8565	0.0012407	668.33	22.959	1.1752	22.959	22.322	23.497	0					27	9	4	0	0	0	0.01076	1	2369	104.37	69.645	1
HFFMPGFAPLTS	12	Unmodified	_HFFMPGFAPLTS_			0	0		P68372;P99024;Q7TMM9;Q9CWF2;Q9D6F9	P68372;P99024;Q7TMM9;Q9D6F9	P68372	Tubb4b;Tubb5;Tubb2a;Tubb2b;Tubb4a	Tubulin beta-4B chain;Tubulin beta-5 chain;Tubulin beta-2A chain;Tubulin beta-2B chain;Tubulin beta-4A chain	MULTI-SECPEP	20230107_Microdroplet_Brain_BU_LongerGradient_250um	Brain_BU_LongerGradient_250um	677.313	2	676.329	1350.64	1.9467	0.0013166	0.7551	0.0005107	2.7018	0.0018273	676.329	21.799	0.69333	21.799	21.512	22.205	0					15	5	3	0	0	0	3.0211e-05	1	2286	147.34	97.522	1
HFFMPGFAPLTSRGSQQ	17	Unmodified	_HFFMPGFAPLTSRGSQQ_			0	0		P68372;P99024;Q7TMM9;Q9CWF2;Q9D6F9	P68372;P99024;Q7TMM9;Q9D6F9	P68372	Tubb4b;Tubb5;Tubb2a;Tubb2b;Tubb4a	Tubulin beta-4B chain;Tubulin beta-5 chain;Tubulin beta-2A chain;Tubulin beta-2B chain;Tubulin beta-4A chain	MULTI-MSMS	20230107_Microdroplet_Brain_BU_LongerGradient_250um	Brain_BU_LongerGradient_250um	636.647	3	636.646	1906.91	2.3558	0.0014998	-0.42606	-0.00027125	1.9297	0.0012285	636.98	18.447	1.1669	18.447	17.857	19.024	0					46	10	5	0	0	0	3.9204e-07	2	1916	180.49	112.23	1
HFFMPGFAPLTSRGSQQ	17	Unmodified	_HFFMPGFAPLTSRGSQQ_			0	0		P68372;P99024;Q7TMM9;Q9CWF2;Q9D6F9	P68372;P99024;Q7TMM9;Q9D6F9	P68372	Tubb4b;Tubb5;Tubb2a;Tubb2b;Tubb4a	Tubulin beta-4B chain;Tubulin beta-5 chain;Tubulin beta-2A chain;Tubulin beta-2B chain;Tubulin beta-4A chain	MULTI-SECPEP	20230107_Microdroplet_Brain_BU_LongerGradient_250um	Brain_BU_LongerGradient_250um	955.614	2	954.465	1906.91	2.3009	0.0021961	0.0075806	7.2354e-06	2.3084	0.0022033	954.967	18.447	0.93975	18.447	17.857	18.797	0					15	8	2	0	0	0	2.5315e-06	1	1941	173.76	108.26	1
HKTDLNPDNLQGGDDLDPNY	20	Unmodified	_HKTDLNPDNLQGGDDLDPNY_			0	0		Q04447	Q04447	Q04447	Ckb	Creatine kinase B-type	MULTI-MSMS	20230107_Microdroplet_Brain_BU_LongerGradient_250um	Brain_BU_LongerGradient_250um	748.01	3	747.673	2240	2.3308	0.0017427	-0.23956	-0.00017911	2.0912	0.0015635	748.007	11.496	1.5559	11.496	10.834	12.39	0					40	13	4	0	0	0	2.16e-07	1	1214	173.77	126.57	1
HKTDLNPDNLQGGDDLDPNYVL	22	Unmodified	_HKTDLNPDNLQGGDDLDPNYVL_			0	0		Q04447	Q04447	Q04447	Ckb	Creatine kinase B-type	MULTI-MSMS	20230107_Microdroplet_Brain_BU_LongerGradient_250um	Brain_BU_LongerGradient_250um	818.725	3	818.391	2452.15	2.0684	0.0016928	-0.14285	-0.0001169	1.9256	0.0015759	818.725	17.396	1.1598	17.396	16.809	17.969	0					32	10	5	0	0	0	0.015106	1	1840	89.201	55.796	1
HLVHWNTKYGDF	12	Unmodified	_HLVHWNTKYGDF_			0	0		P00920	P00920	P00920	Ca2	Carbonic anhydrase 2	MULTI-MSMS	20230107_Microdroplet_Brain_BU_LongerGradient_250um	Brain_BU_LongerGradient_250um	506.25	3	506.249	1515.73	1.8956	0.00095965	0.28976	0.00014669	2.1854	0.0011063	506.249	8.0227	2.1627	8.0227	7.0404	9.2031	0					47	20	3	0	0	0	0.0025538	1	885	113.95	82.103	1
HRIIPGF	7	Unmodified	_HRIIPGF_			0	0		P17742	P17742	P17742	Ppia	Peptidyl-prolyl cis-trans isomerase A;Peptidyl-prolyl cis-trans isomerase A, N-terminally processed	MULTI-MSMS	20230107_Microdroplet_Brain_BU_LongerGradient_250um	Brain_BU_LongerGradient_250um	420.249	2	420.248	838.481	2.1002	0.00088261	-0.41663	-0.00017509	1.6836	0.00070752	420.248	5.6222	1.3037	5.6222	5.0905	6.3943	0					28	16	2	0	0	0	0.025035	1	564	99.511	10.884	1
HVDITEWHKGIQE	13	Unmodified	_HVDITEWHKGIQE_			0	0		O08553	O08553	O08553	Dpysl2	Dihydropyrimidinase-related protein 2	MULTI-MSMS	20230107_Microdroplet_Brain_BU_LongerGradient_250um	Brain_BU_LongerGradient_250um	531.268	3	531.267	1590.78	2.0983	0.0011147	0.15054	7.9979e-05	2.2488	0.0011947	531.267	5.3423	1.1909	5.3423	4.9583	6.1492	0					35	15	3	0	0	0	0.016422	1	577	97.69	71.158	1
HVDITEWHKGIQEEM	15	Unmodified	_HVDITEWHKGIQEEM_			0	0		O08553	O08553	O08553	Dpysl2	Dihydropyrimidinase-related protein 2	MULTI-MSMS	20230107_Microdroplet_Brain_BU_LongerGradient_250um	Brain_BU_LongerGradient_250um	618.296	3	617.961	1850.86	2.3228	0.0014354	-0.3805	-0.00023513	1.9423	0.0012003	618.295	11.014	1.5289	11.014	10.076	11.605	0					41	13	4	0	0	0	1.715e-06	1	1161	157.68	120.91	1
HVTEGSGRYIPRKPFPDF	18	Unmodified	_HVTEGSGRYIPRKPFPDF_			0	0		O08553	O08553	O08553	Dpysl2	Dihydropyrimidinase-related protein 2	MULTI-MSMS	20230107_Microdroplet_Brain_BU_LongerGradient_250um	Brain_BU_LongerGradient_250um	526.525	4	526.525	2102.07	1.8469	0.00097243	0.023167	1.2198e-05	1.8701	0.00098463	526.775	8.9616	3.4209	8.9616	7.8626	11.283	0					137	31	6	0	0	0	2.6007e-05	3	1002	152.94	117.17	1
HVTEGSGRYIPRKPFPDF	18	Unmodified	_HVTEGSGRYIPRKPFPDF_			0	0		O08553	O08553	O08553	Dpysl2	Dihydropyrimidinase-related protein 2	MULTI-MSMS	20230107_Microdroplet_Brain_BU_LongerGradient_250um	Brain_BU_LongerGradient_250um	702.033	3	701.697	2102.07	2.2304	0.0015651	0.21159	0.00014847	2.442	0.0017136	702.031	9.0412	2.2355	9.0412	8.1684	10.404	0					72	20	5	0	0	0	0.00045606	2	1016	124.77	89.863	1
IAAQKGLDPYNMLPPKAASGTKEDPNL	27	Unmodified	_IAAQKGLDPYNMLPPKAASGTKEDPNL_			0	0		P19536	P19536	P19536	Cox5b	Cytochrome c oxidase subunit 5B, mitochondrial	MULTI-MSMS	20230107_Microdroplet_Brain_BU_LongerGradient_250um	Brain_BU_LongerGradient_250um	710.875	4	710.622	2838.46	2.0862	0.0014825	-0.27664	-0.00019659	1.8095	0.0012859	711.123	16.486	1.6766	16.486	15.774	17.451	0					42	15	4	0	0	0	0.0027402	1	1734	108.63	73.971	1
IAAQKGLDPYNMLPPKAASGTKEDPNLVPSISN	33	Unmodified	_IAAQKGLDPYNMLPPKAASGTKEDPNLVPSISN_			0	0		P19536	P19536	P19536	Cox5b	Cytochrome c oxidase subunit 5B, mitochondrial	MULTI-MSMS	20230107_Microdroplet_Brain_BU_LongerGradient_250um	Brain_BU_LongerGradient_250um	860.455	4	859.95	3435.77	1.4625	0.0012576	0.15013	0.0001291	1.6126	0.0013867	860.453	19.146	0.89715	19.146	18.906	19.804	0					22	7	4	0	0	0	4.003e-05	1	2061	126.88	102.9	1
IAAQKGLDPYNMLPPKAASGTKEDPNLVPSISNKRIVG	38	Unmodified	_IAAQKGLDPYNMLPPKAASGTKEDPNLVPSISNKRIVG_			0	0		P19536	P19536	P19536	Cox5b	Cytochrome c oxidase subunit 5B, mitochondrial	MULTI-MSMS	20230107_Microdroplet_Brain_BU_LongerGradient_250um	Brain_BU_LongerGradient_250um	799.239	5	798.835	3989.14	2.244	0.0017926	-0.098203	-7.8448e-05	2.1458	0.0017141	799.237	18.474	1.4881	18.474	17.857	19.345	0					46	13	5	0	0	0	1.0961e-09	1	1967	183.89	156.38	1
IAFPGDIL	8	Unmodified	_IAFPGDIL_			0	0		P43006	P43006	P43006	Slc1a2	Excitatory amino acid transporter 2	MULTI-MSMS	20230107_Microdroplet_Brain_BU_LongerGradient_250um	Brain_BU_LongerGradient_250um	423.243	2	423.242	844.469	1.9767	0.00083664	0.011193	4.7375e-06	1.9879	0.00084137	423.242	21.034	1.147	21.034	20.708	21.855	0					22	9	3	0	0	0	0.014516	1	2207	105.42	27.475	1
IAGDPRSSPLIQF	13	Unmodified	_IAGDPRSSPLIQF_			0	0		P17427	P17427	P17427	Ap2a2	AP-2 complex subunit alpha-2	MULTI-MSMS	20230107_Microdroplet_Brain_BU_LongerGradient_250um	Brain_BU_LongerGradient_250um	701.383	2	700.88	1399.75	2.068	0.0014494	-0.47392	-0.00033216	1.5941	0.0011173	701.381	16.563	0.93147	16.563	16.089	17.021	0					17	8	3	0	0	0	0.020477	1	1758	93.096	44.813	1
IAGDPRSSPPVQF	13	Unmodified	_IAGDPRSSPPVQF_			0	0		P17426	P17426	P17426	Ap2a1	AP-2 complex subunit alpha-1	MULTI-MSMS	20230107_Microdroplet_Brain_BU_LongerGradient_250um	Brain_BU_LongerGradient_250um	685.857	2	685.857	1369.7	2.2527	0.001545	0.1413	9.6911e-05	2.394	0.0016419	685.857	10.169	1.7407	10.169	9.311	11.052	0					32	15	3	0	0	0	0.03403	2	1127	77.744	28.343	1
IDLPGITKVPVGDQPPDIE	19	Unmodified	_IDLPGITKVPVGDQPPDIE_			0	0		P39054;Q8BZ98	P39054	P39054	Dnm2;Dnm3	Dynamin-2;Dynamin-3	MULTI-MSMS	20230107_Microdroplet_Brain_BU_LongerGradient_250um	Brain_BU_LongerGradient_250um	1002.54	2	1002.04	2002.06	1.9666	0.0019706	-0.22003	-0.00022048	1.7466	0.0017501	1002.54	21.519	0.57932	21.519	21.047	21.626	0					11	4	3	0	0	0	2.068e-07	1	2260	178.07	143.39	1
IDLPGITKVPVGDQPPDIEY	20	Unmodified	_IDLPGITKVPVGDQPPDIEY_			0	0		P39054;Q8BZ98	P39054	P39054	Dnm2;Dnm3	Dynamin-2;Dynamin-3	MULTI-MSMS	20230107_Microdroplet_Brain_BU_LongerGradient_250um	Brain_BU_LongerGradient_250um	1084.07	2	1083.57	2165.13	2.5434	0.002756	-0.57559	-0.00062369	1.9678	0.0021323	1084.07	22.883	0.70588	22.883	22.439	23.145	0					10	5	3	0	0	0	3.3888e-07	1	2397	161.84	119.29	1
IEDPFDQDD	9	Unmodified	_IEDPFDQDD_			0	0		P17182;P21550;P17183	P17182;P17183	P17182	Eno1;Eno3;Eno2	Alpha-enolase;Beta-enolase;Gamma-enolase	MULTI-SECPEP	20230107_Microdroplet_Brain_BU_LongerGradient_250um	Brain_BU_LongerGradient_250um	547.294	2	547.22	1092.42	2.2568	0.001235	-0.15076	-8.25e-05	2.1061	0.0011525	547.22	8.9235	2.1122	8.9235	8.0697	10.182	0					42	19	3	0	0	0	0.0047797	1	928	118.33	69.773	1
[truncated: 509 more rows]
[truncated: 11 more columns]

## Sheet: Note
	Differences between source data and supplementary table
	Protein
[truncated: 3 more rows]
