# Supplementary material for: Real-time bottom-up characterization of protein mixtures enabled by online microdroplet-assisted enzymatic digestion (MAED)
Source: Royal Society of Chemistry journal article supplement (doi:10.1039/d3cc03509c), 2023-01-01
Supplement: d3cc03509c3.xlsx [file d3cc03509c3.xlsx]

## Sheet: Table S1
	Table S1. Peptides of Cycs (dissolved in 0.1% FA) undergoing MAED.
	No.	Residue		Length	Mass (Da)		Sequence		Modifications
		From	To
	1	2	11	10	1161.64		GDVEKGKKIF		N' acetylation
	2	2	37	36	4575.19		GDVEKGKKIFVQKCAQCHTVEKGGKHKTGPNLHGLF		N' acetylation, Heme
	3	2	47	46	5574.78		GDVEKGKKIFVQKCAQCHTVEKGGKHKTGPNLHGLFGRKTGQAPGF		N' acetylation, Heme
	4	2	48	47	5675.76		GDVEKGKKIFVQKCAQCHTVEKGGKHKTGPNLHGLFGRKTGQAPGFT		N' acetylation, Heme
	5	2	65	64	7667.75		GDVEKGKKIFVQKCAQCHTVEKGGKHKTGPNLHGLFGRKTGQAPGFTYTDANKNKGITWKEETL		N' acetylation, Heme
	6	2	67	66	7926.87		GDVEKGKKIFVQKCAQCHTVEKGGKHKTGPNLHGLFGRKTGQAPGFTYTDANKNKGITWKEETLME		N' acetylation, Heme
	7	38	65	28	3110.56		GRKTGQAPGFTYTDANKNKGITWKEETL		X
	8	38	67	30	3370.64		GRKTGQAPGFTYTDANKNKGITWKEETLME		X
	9	48	65	18	2111.05		TYTDANKNKGITWKEETL		X
	10	49	65	17	2010		YTDANKNKGITWKEETL		X
	11	49	67	19	2270.07		YTDANKNKGITWKEETLME		X
	12	66	83	18	2201.12		MEYLENPKKYIPGTKMIF		X
	13	66	95	30	3569.89		MEYLENPKKYIPGTKMIFAGIKKKTEREDL		X
	14	66	97	32	3754.02		MEYLENPKKYIPGTKMIFAGIKKKTEREDLIA		X
	15	67	83	17	2070.08		EYLENPKKYIPGTKMIF		X
	16	68	81	14	1680.89		YLENPKKYIPGTKM		X
	17	68	83	16	1941.04		YLENPKKYIPGTKMIF		X
	18	68	95	28	3309.8		YLENPKKYIPGTKMIFAGIKKKTEREDL		X
	19	68	97	30	3493.94		YLENPKKYIPGTKMIFAGIKKKTEREDLIA		X
	20	82	95	14	1646.93		IFAGIKKKTEREDL		X
	21	82	97	16	1831.05		IFAGIKKKTEREDLIA		X
	22	84	95	12	1386.78		AGIKKKTEREDL		X
	23	84	97	14	1570.89		AGIKKKTEREDLIA		X
	24	96	105	10	1149.64		IAYLKKATNE		X
	25	98	105	8	965.518		YLKKATNE		X
	26	99	105	7	802.454		LKKATNE		X
							Cycs [2-105]		100% coverage
									Initiator methionine removed

## Sheet: Table S2
	Table S2. Peptides of Cycs (dissolved in 0.1% FA) undergoing 12 hr bulk digestion.
	No.	Residue		Length	Mass (Da)		Sequence		Modifications
		From	To
	1	2	11	10	1161.64		GDVEKGKKIF		N' acetylation
	2	4	11	8	947.585		VEKGKKIF		X
	3	23	33	11	1135.65		KGGKHKTGPNL		X
	4	23	36	14	1442.81		KGGKHKTGPNLHGL		X
	5	23	37	15	1589.88		KGGKHKTGPNLHGLF		X
	6	38	47	10	1017.54		GRKTGQAPGF		X
	7	38	48	11	1118.58		GRKTGQAPGFT		X
	8	48	59	12	1324.67		TYTDANKNKGIT		X
	9	48	60	13	1510.75		TYTDANKNKGITW		X
	10	48	62	15	1767.88		TYTDANKNKGITWKE		X
	11	48	65	18	2111.06		TYTDANKNKGITWKEETL		X
	12	49	60	12	1409.7		YTDANKNKGITW		X
	13	49	62	14	1666.83		YTDANKNKGITWKE		X
	14	49	65	17	2010.01		YTDANKNKGITWKEETL		X
	15	51	65	15	1745.91		DANKNKGITWKEETL		X
	16	67	81	15	1809.93		EYLENPKKYIPGTKM		X
	17	68	81	14	1680.9		YLENPKKYIPGTKM		X
	18	69	81	13	1517.84		LENPKKYIPGTKM		X
	19	82	95	14	1646.94		IFAGIKKKTEREDL		X
	20	84	95	12	1386.79		AGIKKKTEREDL		X
	21	86	95	10	1258.73		IKKKTEREDL		X
	22	98	105	8	965.525		YLKKATNE		X
	23	99	105	7	802.459		LKKATNE		X
							Cycs [2-105]		86.5% coverage
									Initiator methionine removed

## Sheet: Table S3
	Table S3. Peptides of Cycs (dissolved in 50% ACN) undergoing MAED at a travel distance of 0.5 cm (a), 1.0 cm (b), 2.0 cm (c), 3.0 cm (d), and 4.0 cm (e).
(a)	No.	Residue		Length	Mass (Da)		Sequence		Modifications
		From	To
	1	2	37	36	4575.22		GDVEKGKKIFVQKCAQCHTVEKGGKHKTGPNLHGLF		N' acetylation, Heme
	2	2	65	64	7667.78		GDVEKGKKIFVQKCAQCHTVEKGGKHKTGPNLHGLFGRKTGQAPGFTYTDANKNKGITWKEETL		N' acetylation, Heme
	3	2	67	66	7927.85		GDVEKGKKIFVQKCAQCHTVEKGGKHKTGPNLHGLFGRKTGQAPGFTYTDANKNKGITWKEETLME		N' acetylation, Heme
	4	38	67	30	3370.65		GRKTGQAPGFTYTDANKNKGITWKEETLME		X
	5	66	95	30	3570.89		MEYLENPKKYIPGTKMIFAGIKKKTEREDL		X
	6	66	97	32	3754		MEYLENPKKYIPGTKMIFAGIKKKTEREDLIA		X
	7	66	105	40	4701.51		MEYLENPKKYIPGTKMIFAGIKKKTEREDLIAYLKKATNE		X
	8	67	95	29	3438.85		EYLENPKKYIPGTKMIFAGIKKKTEREDL		X
	9	67	105	39	4570.45		EYLENPKKYIPGTKMIFAGIKKKTEREDLIAYLKKATNE		X
	10	68	81	14	1680.89		YLENPKKYIPGTKM		X
	11	68	83	16	1941.04		YLENPKKYIPGTKMIF		X
	12	68	95	28	3309.81		YLENPKKYIPGTKMIFAGIKKKTEREDL		X
	13	68	97	30	3493.93		YLENPKKYIPGTKMIFAGIKKKTEREDLIA		X
	14	68	98	31	3657		YLENPKKYIPGTKMIFAGIKKKTEREDLIAY		X
	15	68	105	38	4441.44		YLENPKKYIPGTKMIFAGIKKKTEREDLIAYLKKATNE		X
	16	84	105	22	2518.4		AGIKKKTEREDLIAYLKKATNE		X
	17	96	105	10	1149.64		IAYLKKATNE		X
	18	97	105	9	1036.55		AYLKKATNE		X
	19	98	105	8	965.516		YLKKATNE		X
							Cycs [2-105]		100% coverage
									Initiator methionine removed
(b)	No.	Residue		Length	Mass (Da)		Sequence		Modifications
		From	To
	1	2	37	36	4575.24		GDVEKGKKIFVQKCAQCHTVEKGGKHKTGPNLHGLF		N' acetylation, Heme
	2	2	65	64	7667.81		GDVEKGKKIFVQKCAQCHTVEKGGKHKTGPNLHGLFGRKTGQAPGFTYTDANKNKGITWKEETL		N' acetylation, Heme
	3	2	67	66	7927.89		GDVEKGKKIFVQKCAQCHTVEKGGKHKTGPNLHGLFGRKTGQAPGFTYTDANKNKGITWKEETLME		N' acetylation, Heme
	4	38	65	28	3110.57		GRKTGQAPGFTYTDANKNKGITWKEETL		X
	5	38	67	30	3370.66		GRKTGQAPGFTYTDANKNKGITWKEETLME		X
	6	66	95	30	3569.88		MEYLENPKKYIPGTKMIFAGIKKKTEREDL		X
	7	66	97	32	3754.01		MEYLENPKKYIPGTKMIFAGIKKKTEREDLIA		X
	8	66	105	40	4701.51		MEYLENPKKYIPGTKMIFAGIKKKTEREDLIAYLKKATNE		X
	9	68	81	14	1680.89		YLENPKKYIPGTKM		X
	10	68	83	16	1941.04		YLENPKKYIPGTKMIF		X
	11	68	95	28	3309.8		YLENPKKYIPGTKMIFAGIKKKTEREDL		X
	12	68	97	30	3493.93		YLENPKKYIPGTKMIFAGIKKKTEREDLIA		X
	13	68	98	31	3658		YLENPKKYIPGTKMIFAGIKKKTEREDLIAY		X
	14	68	105	38	4441.42		YLENPKKYIPGTKMIFAGIKKKTEREDLIAYLKKATNE		X
	15	84	105	22	2518.41		AGIKKKTEREDLIAYLKKATNE		X
	16	96	105	10	1149.64		IAYLKKATNE		X
	17	97	105	9	1036.55		AYLKKATNE		X
	18	98	105	8	965.52		YLKKATNE		X
							Cycs [2-105]		100% coverage
									Initiator methionine removed
(c)	No.	Residue		Length	Mass (Da)		Sequence		Modifications
		From	To
	1	2	37	36	4575.23		GDVEKGKKIFVQKCAQCHTVEKGGKHKTGPNLHGLF		N' acetylation, Heme
	2	2	67	66	7927.86		GDVEKGKKIFVQKCAQCHTVEKGGKHKTGPNLHGLFGRKTGQAPGFTYTDANKNKGITWKEETLME		N' acetylation, Heme
	3	38	67	30	3370.65		GRKTGQAPGFTYTDANKNKGITWKEETLME		X
	4	66	95	30	3568.88		MEYLENPKKYIPGTKMIFAGIKKKTEREDL		X
	5	66	97	32	3754.01		MEYLENPKKYIPGTKMIFAGIKKKTEREDLIA		X
	6	66	105	40	4701.53		MEYLENPKKYIPGTKMIFAGIKKKTEREDLIAYLKKATNE		X
	7	67	105	39	4570.48		EYLENPKKYIPGTKMIFAGIKKKTEREDLIAYLKKATNE		X
	8	68	81	14	1680.89		YLENPKKYIPGTKM		X
	9	68	83	16	1941.04		YLENPKKYIPGTKMIF		X
	10	68	95	28	3309.82		YLENPKKYIPGTKMIFAGIKKKTEREDL		X
	11	68	97	30	3493.93		YLENPKKYIPGTKMIFAGIKKKTEREDLIA		X
	12	68	98	31	3657		YLENPKKYIPGTKMIFAGIKKKTEREDLIAY		X
	13	68	105	38	4441.43		YLENPKKYIPGTKMIFAGIKKKTEREDLIAYLKKATNE		X
	14	84	105	22	2518.41		AGIKKKTEREDLIAYLKKATNE		X
	15	96	105	10	1149.64		IAYLKKATNE		X
	16	97	105	9	1036.55		AYLKKATNE		X
	17	98	105	8	965.517		YLKKATNE		X
							Cycs [2-105]		100% coverage
									Initiator methionine removed
(d)	No.	Residue		Length	Mass (Da)		Sequence		Modifications
		From	To
	1	2	37	36	4575.22		GDVEKGKKIFVQKCAQCHTVEKGGKHKTGPNLHGLF		N' acetylation, Heme
	2	2	65	64	7667.77		GDVEKGKKIFVQKCAQCHTVEKGGKHKTGPNLHGLFGRKTGQAPGFTYTDANKNKGITWKEETL		N' acetylation, Heme
	3	2	67	66	7927.87		GDVEKGKKIFVQKCAQCHTVEKGGKHKTGPNLHGLFGRKTGQAPGFTYTDANKNKGITWKEETLME		N' acetylation, Heme
	4	38	65	28	3110.57		GRKTGQAPGFTYTDANKNKGITWKEETL		X
	5	38	67	30	3370.65		GRKTGQAPGFTYTDANKNKGITWKEETLME		X
	6	66	95	30	3569.89		MEYLENPKKYIPGTKMIFAGIKKKTEREDL		X
	7	66	97	32	3754.01		MEYLENPKKYIPGTKMIFAGIKKKTEREDLIA		X
	8	66	105	40	4701.51		MEYLENPKKYIPGTKMIFAGIKKKTEREDLIAYLKKATNE		X
	9	67	105	39	4570.47		EYLENPKKYIPGTKMIFAGIKKKTEREDLIAYLKKATNE		X
	10	68	81	14	1680.89		YLENPKKYIPGTKM		X
	11	68	83	16	1941.04		YLENPKKYIPGTKMIF		X
	12	68	95	28	3309.8		YLENPKKYIPGTKMIFAGIKKKTEREDL		X
	13	68	97	30	3493.93		YLENPKKYIPGTKMIFAGIKKKTEREDLIA		X
	14	68	98	31	3657		YLENPKKYIPGTKMIFAGIKKKTEREDLIAY		X
	15	68	105	38	4441.43		YLENPKKYIPGTKMIFAGIKKKTEREDLIAYLKKATNE		X
	16	84	105	22	2518.41		AGIKKKTEREDLIAYLKKATNE		X
	17	96	105	10	1149.64		IAYLKKATNE		X
	18	98	105	8	965.516		YLKKATNE		X
							Cycs [2-105]		100% coverage
									Initiator methionine removed
(e)	No.	Residue		Length	Mass (Da)		Sequence		Modifications
		From	To
	1	2	37	36	4575.21		GDVEKGKKIFVQKCAQCHTVEKGGKHKTGPNLHGLF		N' acetylation, Heme
	2	2	65	64	7667.76		GDVEKGKKIFVQKCAQCHTVEKGGKHKTGPNLHGLFGRKTGQAPGFTYTDANKNKGITWKEETL		N' acetylation, Heme
	3	2	67	66	7927.86		GDVEKGKKIFVQKCAQCHTVEKGGKHKTGPNLHGLFGRKTGQAPGFTYTDANKNKGITWKEETLME		N' acetylation, Heme
	4	38	67	30	3370.65		GRKTGQAPGFTYTDANKNKGITWKEETLME		X
	5	66	83	18	2202.12		MEYLENPKKYIPGTKMIF		X
	6	66	95	30	3569.89		MEYLENPKKYIPGTKMIFAGIKKKTEREDL		X
	7	66	97	32	3754		MEYLENPKKYIPGTKMIFAGIKKKTEREDLIA		X
	8	66	105	40	4701.52		MEYLENPKKYIPGTKMIFAGIKKKTEREDLIAYLKKATNE		X
	9	67	105	39	4570.47		EYLENPKKYIPGTKMIFAGIKKKTEREDLIAYLKKATNE		X
	10	68	81	14	1680.89		YLENPKKYIPGTKM		X
	11	68	83	16	1941.04		YLENPKKYIPGTKMIF		X
	12	68	95	28	3309.81		YLENPKKYIPGTKMIFAGIKKKTEREDL		X
	13	68	97	30	3493.93		YLENPKKYIPGTKMIFAGIKKKTEREDLIA		X
	14	68	98	31	3656.99		YLENPKKYIPGTKMIFAGIKKKTEREDLIAY		X
	15	68	105	38	4441.43		YLENPKKYIPGTKMIFAGIKKKTEREDLIAYLKKATNE		X
	16	84	105	22	2518.4		AGIKKKTEREDLIAYLKKATNE		X
	17	96	105	10	1149.63		IAYLKKATNE		X
	18	98	105	8	965.515		YLKKATNE		X
							Cycs [2-105]		100% coverage
									Initiator methionine removed

## Sheet: Table S4
	Table S4. Peptides of Cycs undergoing online MAED.
	No.	Residue		Length	Mass (Da)		Sequence		Modifications
		From	To
	1	2	37	36	4575.23		GDVEKGKKIFVQKCAQCHTVEKGGKHKTGPNLHGLF		N' acetylation, Heme
	2	2	47	46	5574.79		GDVEKGKKIFVQKCAQCHTVEKGGKHKTGPNLHGLFGRKTGQAPGF		N' acetylation, Heme
	3	2	65	64	7667.8		GDVEKGKKIFVQKCAQCHTVEKGGKHKTGPNLHGLFGRKTGQAPGFTYTDANKNKGITWKEETL		N' acetylation, Heme
	4	2	67	66	7927.92		GDVEKGKKIFVQKCAQCHTVEKGGKHKTGPNLHGLFGRKTGQAPGFTYTDANKNKGITWKEETLME		N' acetylation, Heme
	5	38	65	28	3110.59		GRKTGQAPGFTYTDANKNKGITWKEETL		X
	6	38	67	30	3370.69		GRKTGQAPGFTYTDANKNKGITWKEETLME		X
	7	66	83	18	2201.13		MEYLENPKKYIPGTKMIF		X
	8	66	95	30	3569.9		MEYLENPKKYIPGTKMIFAGIKKKTEREDL		X
	9	66	97	32	3754.01		MEYLENPKKYIPGTKMIFAGIKKKTEREDLIA		X
	10	67	95	29	3438.86		EYLENPKKYIPGTKMIFAGIKKKTEREDL		X
	11	68	81	14	1680.89		YLENPKKYIPGTKM		X
	12	68	83	16	1941.05		YLENPKKYIPGTKMIF		X
	13	68	95	28	3309.83		YLENPKKYIPGTKMIFAGIKKKTEREDL		X
	14	68	97	30	3493.95		YLENPKKYIPGTKMIFAGIKKKTEREDLIA		X
	15	82	95	14	1646.93		IFAGIKKKTEREDL		X
	16	82	97	16	1831.06		IFAGIKKKTEREDLIA		X
	17	84	95	12	1386.78		AGIKKKTEREDL		X
	18	84	97	14	1570.91		AGIKKKTEREDLIA		X
	19	84	105	22	2518.42		AGIKKKTEREDLIAYLKKATNE		X
	20	96	105	10	1149.64		IAYLKKATNE		X
	21	97	105	9	1036.56		AYLKKATNE		X
	22	98	105	8	965.525		YLKKATNE		X
							Cycs [2-105]		100% coverage
									Initiator methionine removed

## Sheet: Table S5
	Table S5. Peptides of Myo undergoing online MAED.
	No.	Residue		Length	Mass (Da)		Sequence		Modifications
		From	To
	1	2	30	29	3133.55		GLSDGEWQQVLNVWGKVEADIAGHGQEVL		X
	2	31	56	26	3144.64		IRLFTGHPETLEKFDKFKHLKTEAEM		X
	3	31	70	40	4650.5		IRLFTGHPETLEKFDKFKHLKTEAEMKASEDLKKHGTVVL		X
	4	34	70	37	4268.23		FTGHPETLEKFDKFKHLKTEAEMKASEDLKKHGTVVL		X
	5	57	70	14	1523.87		KASEDLKKHGTVVL		X
	6	71	106	36	3984.28		TALGGILKKKGHHEAELKPLAQSHATKHKIPIKYLE		X
	7	71	107	37	4131.35		TALGGILKKKGHHEAELKPLAQSHATKHKIPIKYLEF		X
	8	73	107	35	3959.26		LGGILKKKGHHEAELKPLAQSHATKHKIPIKYLEF		X
	9	107	138	32	3388.72		FISDAIIHVLHSKHPGDFGADAQGAMTKALEL		X
	10	108	135	28	2886.44		ISDAIIHVLHSKHPGDFGADAQGAMTKA		X
	11	108	138	31	3241.66		ISDAIIHVLHSKHPGDFGADAQGAMTKALEL		X
	12	111	135	25	2571.3		AIIHVLHSKHPGDFGADAQGAMTKA		X
	13	111	138	28	2926.51		AIIHVLHSKHPGDFGADAQGAMTKALEL		X
	14	112	138	27	2855.48		IIHVLHSKHPGDFGADAQGAMTKALEL		X
	15	136	154	19	2211.17		LELFRNDIAAKYKELGFQG		X
	16	139	154	16	1855.96		FRNDIAAKYKELGFQG		X
							Myo [2-154]		100% coverage
									Initiator methionine removed

## Sheet: Table S6
	Table S6. Peptides of Hba undergoing online MAED.
	No.	Residue		Length	Mass (Da)		Sequence		Modifications
		From	To
	1	2	30	29	2839.46		VLSAADKGNVKAAWGKVGGHAAEYGAEAL		X
	2	2	33	32	3255.65		VLSAADKGNVKAAWGKVGGHAAEYGAEALERM		X
	3	2	34	33	3402.71		VLSAADKGNVKAAWGKVGGHAAEYGAEALERMF		X
	4	31	47	17	2148.05		ERMFLSFPTTKTYFPHF		X
	5	34	47	14	1731.87		FLSFPTTKTYFPHF		X
	6	35	47	13	1584.8		LSFPTTKTYFPHF		X
	7	35	81	47	4942.58		LSFPTTKTYFPHFDLSHGSAQVKGHGAKVAAALTKAVEHLDDLPGAL		X
	8	35	84	50	5271.74		LSFPTTKTYFPHFDLSHGSAQVKGHGAKVAAALTKAVEHLDDLPGALSEL		X
	9	35	99	65	7000.64		LSFPTTKTYFPHFDLSHGSAQVKGHGAKVAAALTKAVEHLDDLPGALSELSDLHAHKLRVDPVNF		X
	10	38	47	10	1237.61		PTTKTYFPHF		X
	11	48	84	37	3704.95		DLSHGSAQVKGHGAKVAAALTKAVEHLDDLPGALSEL		X
	12	48	99	52	5433.85		DLSHGSAQVKGHGAKVAAALTKAVEHLDDLPGALSELSDLHAHKLRVDPVNF		X
	13	82	99	18	2076.08		SELSDLHAHKLRVDPVNF		X
	14	82	107	26	2967.63		SELSDLHAHKLRVDPVNFKLLSHSLL		X
	15	85	107	23	2638.47		SDLHAHKLRVDPVNFKLLSHSLL		X
	16	88	107	20	2323.33		HAHKLRVDPVNFKLLSHSLL		X
	17	100	107	8	909.565		KLLSHSLL		X
	18	108	129	22	2352.21		VTLASHLPSDFTPAVHASLDKF		X
	19	108	137	30	3149.68		VTLASHLPSDFTPAVHASLDKFLANVSTVL		X
	20	108	142	35	3785.02		VTLASHLPSDFTPAVHASLDKFLANVSTVLTSKYR		X
	21	111	142	32	3471.82		ASHLPSDFTPAVHASLDKFLANVSTVLTSKYR		X
	22	130	142	13	1450.81		LANVSTVLTSKYR		X
							Hba [2-142]		100% coverage
									Initiator methionine removed

## Sheet: Table S7
	Table S7. Peptides of Hbb undergoing online MAED.
	No.	Residue		Length	Mass (Da)		Sequence		Modifications
		From	To
	1	1	13	13	1380.7		MLTAEEKAAVTAF		X
	2	1	30	30	3174.67 / 3216.69		MLTAEEKAAVTAFWGKVKVDEVGGEALGRL		X / N' acetylation
	3	14	30	17	1811.99		WGKVKVDEVGGEALGRL		X
	4	31	40	10	1307.7		LVVYPWTQRF		X
	5	31	44	14	1817.91		LVVYPWTQRFFESF		X
	6	31	47	17	2103.05		LVVYPWTQRFFESFGDL		X
	7	31	84	54	6085.07		LVVYPWTQRFFESFGDLSTADAVMNNPKVKAHGKKVLDSFSNGMKHLDDLKGTF		X
	8	41	84	44	4795.37		FESFGDLSTADAVMNNPKVKAHGKKVLDSFSNGMKHLDDLKGTF		X
	9	45	84	40	4285.16		GDLSTADAVMNNPKVKAHGKKVLDSFSNGMKHLDDLKGTF		X
	10	48	84	37	4000.03		STADAVMNNPKVKAHGKKVLDSFSNGMKHLDDLKGTF		X
	11	50	84	35	3811.95		ADAVMNNPKVKAHGKKVLDSFSNGMKHLDDLKGTF		X
	12	52	84	33	3625.89		AVMNNPKVKAHGKKVLDSFSNGMKHLDDLKGTF		X
	13	85	109	25	2774.44		AALSELHCDKLHVDPENFKLLGNVL		X
	14	88	109	22	2519.28		SELHCDKLHVDPENFKLLGNVL		X
	15	102	109	8	902.559		FKLLGNVL		X
	16	110	125	16	1788.03		VVVLARNFGKEFTPVL		X
	17	110	128	19	2102.15		VVVLARNFGKEFTPVLQAD		X
	18	110	145	36	3964.16		VVVLARNFGKEFTPVLQADFQKVVAGVANALAHRYH		X
	19	114	128	15	1691.86		ARNFGKEFTPVLQAD		X
	20	114	145	32	3553.87		ARNFGKEFTPVLQADFQKVVAGVANALAHRYH		X
	21	126	145	20	2194.14		QADFQKVVAGVANALAHRYH		X
	22	128	145	18	1995.04		DFQKVVAGVANALAHRYH		X
	23	129	145	17	1880.02		FQKVVAGVANALAHRYH		X
	24	130	145	16	1732.95		QKVVAGVANALAHRYH		X
	25	134	145	12	1278.66		AGVANALAHRYH		X
	26	137	145	9	1051.53		ANALAHRYH		X
	27	138	145	8	980.494		NALAHRYH		X
							Hbb [1-145]		100% coverage

## Sheet: Table S8
	Table S8. Peptides of CA undergoing online MAED.
	No.	Residue		Length	Mass (Da)		Sequence		Modifications
		From	To
	1	2	32	31	3660.68		SHHWGYGKHNGPEHWHKDFPIANGERQSPVD		N' acetylation
	2	2	35	34	3989.84		SHHWGYGKHNGPEHWHKDFPIANGERQSPVDIDT		N' acetylation
	3	2	37	36	4188.97		SHHWGYGKHNGPEHWHKDFPIANGERQSPVDIDTKA		N' acetylation
	4	2	49	48	5433.72		SHHWGYGKHNGPEHWHKDFPIANGERQSPVDIDTKAVVQDPALKPLAL		N' acetylation
	5	36	49	14	1461.89		KAVVQDPALKPLAL		X
	6	38	48	11	1149.68		VVQDPALKPLA		X
	7	38	49	12	1262.76		VVQDPALKPLAL		X
	8	38	87	50	5414.72		VVQDPALKPLALVYGEATSRRMVNNGHSFNVEYDDSQDKAVLKDGPLTGT		X
	9	50	87	38	4169.97		VYGEATSRRMVNNGHSFNVEYDDSQDKAVLKDGPLTGT		X
	10	50	93	44	4976.42		VYGEATSRRMVNNGHSFNVEYDDSQDKAVLKDGPLTGTYRLVQF		X
	11	88	118	31	3705.77		YRLVQFHFHWGSSDDQGSEHTVDRKKYAAEL		X
	12	91	118	28	3273.52		VQFHFHWGSSDDQGSEHTVDRKKYAAEL		X
	13	94	117	24	2786.24		HFHWGSSDDQGSEHTVDRKKYAAE		X
	14	94	118	25	2899.33		HFHWGSSDDQGSEHTVDRKKYAAEL		X
	15	118	140	23	2567.26		LHLVHWNTKYGDFGTAAQQPDGL		X
	16	119	130	12	1515.73		HLVHWNTKYGDF		X
	17	119	140	22	2454.17		HLVHWNTKYGDFGTAAQQPDGL		X
	18	147	163	17	1764.01		LKVGDANPALQKVLDAL		X
	19	147	188	42	4435.4		LKVGDANPALQKVLDALDSIKTKGKSTDFPNFDPGSLLPNVL		X
	20	147	189	43	4550.43		LKVGDANPALQKVLDALDSIKTKGKSTDFPNFDPGSLLPNVLD		X
	21	147	190	44	4713.49		LKVGDANPALQKVLDALDSIKTKGKSTDFPNFDPGSLLPNVLDY		X
	22	191	203	13	1444.76		WTYPGSLTTPPLL		X
	23	205	230	26	3050.66		SVTWIVLKEPISVSSQQMLKFRTLNF		X
	24	209	222	14	1557.84		IVLKEPISVSSQQM		X
	25	209	230	22	2577.44		IVLKEPISVSSQQMLKFRTLNF		X
	26	239	260	22	2619.47		LMLANWRPAQPLKNRQVRGFPK		X
	27	240	260	21	2506.39		MLANWRPAQPLKNRQVRGFPK		X
	28	241	260	20	2375.35		LANWRPAQPLKNRQVRGFPK		X
	29	242	260	19	2262.26		ANWRPAQPLKNRQVRGFPK		X
	30	243	260	18	2191.22		NWRPAQPLKNRQVRGFPK		X
	31	244	260	17	2077.18		WRPAQPLKNRQVRGFPK		X
							CA [2-260]		94.2% coverage
									Initiator methionine removed

## Sheet: Table S9
	Table S9. Peptides of BSA undergoing online MAED.
	No.	Residue		Length	Mass (Da)		Sequence		Modifications
		From	To
	1	25	48	24	2805.46		DTHKSEIAHRFKDLGEEHFKGLVL		X
	2	49	72	24	2964.43		IAFSQYLQQCPFDEHVKLVNELTE		Carbamidomethylation
	3	73	104	32	3750.74		FAKTCVADESHAGCEKSLHTLFGDELCKVASL		3* Carbamidomethylation
	4	74	97	24	2775.22		AKTCVADESHAGCEKSLHTLFGDE		2* Carbamidomethylation
	5	98	104	7	846.463		LCKVASL		Carbamidomethylation
	6	127	164	38	4623.26		LSHKDDSPDLPKLKPDPNTLCDEFKADEKKFWGKYLYE		Carbamidomethylation
	7	165	177	13	1631.86		IARRHPYFYAPEL		X
	8	165	178	14	1744.94		IARRHPYFYAPELL		X
	9	178	188	11	1350.66		LYYANKYNGVF		X
	10	189	207	19	2420.08		QECCQAEDKGACLLPKIET		3* Carbamidomethylation
	11	237	251	15	1792.96		WSVARLSQKFPKAEF		X
	12	243	251	9	1080.56		SQKFPKAEF		X
	13	252	273	22	2694.35		VEVTKLVTDLTKVHKECCHGDL		2* Carbamidomethylation
	14	284	315	32	4080.9		AKYICDNQDTISSKLKECCDKPLLEKSHCIAE		4* Carbamidomethylation
	15	316	331	16	1720.89		VEKDAIPENLPPLTAD		X
	16	332	353	22	2638.2		FAEDKDVCKNYQEAKDAFLGSF		Carbamidomethylation
	17	333	353	21	2491.13		AEDKDVCKNYQEAKDAFLGSF		Carbamidomethylation
	18	354	369	16	1981.01		LYEYSRRHPEYAVSVL		X
	19	370	380	11	1305.73		LRLAKEYEATL		X
	20	411	430	20	2458.16		IKQNCDQFEKLGEYGFQNAL		Carbamidomethylation
	21	419	430	12	1367.67		EKLGEYGFQNAL		X
	22	431	446	16	1857.08		IVRYTRKVPQVSTPTL		X
	23	479	504	26	3284.67		ILNRLCVLHEKTPVSEKVTKCCTESL		3* Carbamidomethylation
	24	479	529	51	6276.16		ILNRLCVLHEKTPVSEKVTKCCTESLVNRRPCFSALTPDETYVPKAFDEKL		4* Carbamidomethylation
	25	484	529	46	5666.76		CVLHEKTPVSEKVTKCCTESLVNRRPCFSALTPDETYVPKAFDEKL		4* Carbamidomethylation
	26	505	529	25	3009.5		VNRRPCFSALTPDETYVPKAFDEKL		Carbamidomethylation
	27	530	552	23	2761.41		FTFHADICTLPDTEKQIKKQTAL		Carbamidomethylation
	28	553	574	22	2611.4		VELLKHKPKATEEQLKTVMENF		X
	29	578	591	14	1858.73		VDKCCAADDKEACF		3* Carbamidomethylation
	30	592	607	16	1582.89		AVEGPKLVVSTQTALA		X
							BSA [25-607]		78.4% coverage
									Signalling peptide removed

## Sheet: Table S10
	Table S10. Peptides of MAb undergoing online MAED. (a) Peptides of light chain. (b) Peptides of heavy chain.
(a)	No.	Residue		Length	Mass (Da)		Sequence		Modifications
		From	To
	1	1	19	19	1868.92		QSALTQPRSVSGSPGQSVT		Pyroglutamic acid from Asn
	2	34	48	15	1784.94		FVSWYQQHPGKAPKL		X
	3	34	50	17	2029.06		FVSWYQQHPGKAPKLMI		X
	4	34	74	41	4495.25		FVSWYQQHPGKAPKLMIYDATKRPSGVPDRFSGSKSGNTAS		X
	5	34	75	42	4608.33		FVSWYQQHPGKAPKLMIYDATKRPSGVPDRFSGSKSGNTASL		X
	6	34	80	47	5079.6		FVSWYQQHPGKAPKLMIYDATKRPSGVPDRFSGSKSGNTASLTISGL		X
	7	34	87	54	5837.87		FVSWYQQHPGKAPKLMIYDATKRPSGVPDRFSGSKSGNTASLTISGLQAEDEAD		X
	8	34	88	55	6000.94		FVSWYQQHPGKAPKLMIYDATKRPSGVPDRFSGSKSGNTASLTISGLQAEDEADY		X
	9	35	48	14	1637.87		VSWYQQHPGKAPKL		X
	10	35	87	53	5690.81		VSWYQQHPGKAPKLMIYDATKRPSGVPDRFSGSKSGNTASLTISGLQAEDEAD		X
	11	38	48	11	1265.69		YQQHPGKAPKL		X
	12	38	75	38	4089.09		YQQHPGKAPKLMIYDATKRPSGVPDRFSGSKSGNTASL		X
	13	38	80	43	4560.35		YQQHPGKAPKLMIYDATKRPSGVPDRFSGSKSGNTASLTISGL		X
	14	38	87	50	5318.63		YQQHPGKAPKLMIYDATKRPSGVPDRFSGSKSGNTASLTISGLQAEDEAD		X
	15	49	75	27	2841.41		MIYDATKRPSGVPDRFSGSKSGNTASL		X
	16	49	87	39	4070.95		MIYDATKRPSGVPDRFSGSKSGNTASLTISGLQAEDEAD		X
	17	81	87	7	776.282		QAEDEAD		X
	18	88	109	22	2548.1		YYCCSYAGDYTPGVVFGGGTKL		2* Carbamidomethylation
	19	89	109	21	2385.04		YCCSYAGDYTPGVVFGGGTKL		2* Carbamidomethylation
	20	93	109	17	1700.84		YAGDYTPGVVFGGGTKL		X
	21	94	109	16	1537.78		AGDYTPGVVFGGGTKL		X
	22	110	138	29	2993.61		TVLGQPKAAPSVTLFPPSSEELQANKATL		X
	23	139	151	13	1497.72		VCLISDFYPGAVT		Carbamidomethylation
	24	139	183	45	4851.37		VCLISDFYPGAVTVAWKADSSPVKAGVETTTPSKQSNNKYAASSY		Carbamidomethylation
	25	142	183	42	4422.17		ISDFYPGAVTVAWKADSSPVKAGVETTTPSKQSNNKYAASSY		X
	26	152	183	32	3371.66		VAWKADSSPVKAGVETTTPSKQSNNKYAASSY		X
	27	154	183	30	3201.56		WKADSSPVKAGVETTTPSKQSNNKYAASSY		X
	28	184	218	35	4132.92		LSLTPEQWKSHRSYSCQVTHEGSTVEKTVAPTECS		2* Carbamidomethylation
	29	208	218	11	1276.6		VEKTVAPTECS		Carbamidomethylation
	30	210	218	9	1048.49		KTVAPTECS		Carbamidomethylation
							Light chain [1-218]		93.6% coverage
(b)	No.	Residue		Length	Mass (Da)		Sequence		Modifications
		From	To
	1	1	20	20	1994.08		EVQLVESGGGLVQPGGSLRL		X
	2	23	46	24	2691.32		VASGFTLNNYDMHWVRQGIGKGLE		X
	3	27	46	20	2377.16		FTLNNYDMHWVRQGIGKGLE		X
	4	35	46	12	1378.75		HWVRQGIGKGLE		X
	5	37	78	42	4569.42		VRQGIGKGLEWVSKIGTAGDRYYAGSVKGRFTISRENAKDSL		X
	6	47	67	21	2317.2		WVSKIGTAGDRYYAGSVKGRF		X
	7	47	78	32	3531.82		WVSKIGTAGDRYYAGSVKGRFTISRENAKDSL		X
	8	47	79	33	3694.89		WVSKIGTAGDRYYAGSVKGRFTISRENAKDSLY		X
	9	59	78	20	2198.14		YAGSVKGRFTISRENAKDSL		X
	10	68	78	11	1232.64		TISRENAKDSL		X
	11	79	90	12	1365.67		YLQMNSLRVGDA		X
	12	83	92	10	1000.53		NSLRVGDAAV		X
	13	83	94	12	1326.66		NSLRVGDAAVYY		X
	14	108	116	9	1053.46		FDIWGQGTM		X
	15	109	116	8	906.391		DIWGQGTM		X
	16	117	146	30	2791.46		VTVSSASTKGPSVFPLAPSSKSTSGGTAAL		X
	17	150	178	29	3117.58		VKDYFPEPVTVSWNSGALTSGVHTFPAVL		X
	18	160	178	19	1941.99		VSWNSGALTSGVHTFPAVL		X
	19	239	256	18	1943.06		LGGPSVFLFPPKPKDTLM		X
	20	245	256	12	1432.78		FLFPPKPKDTLM		X
	21	246	256	11	1285.71		LFPPKPKDTLM		X
	22	248	256	9	1025.56		PPKPKDTLM		X
	23	257	265	9	1118.54		ISRTPEVTC		Carbamidomethylation
	24	257	266	10	1217.61		ISRTPEVTCV		Carbamidomethylation
	25	266	281	16	1897.92		VVVDVSHEDPEVKFNW		X
	26	311	352	42	4842.6		TVLHQDWLNGKEYKCKVSNKALPAPIEKTISKAKGQPREPQV		Carbamidomethylation
	27	311	369	59	6784.61		TVLHQDWLNGKEYKCKVSNKALPAPIEKTISKAKGQPREPQVYTLPPSRDELTKNQVSL		Carbamidomethylation
	28	373	380	8	911.439		VKGFYPSD		X
	29	378	436	59	6761.18		PSDIAVEWESNGQPENNYKTTPPVLDSDGSFFLYSKLTVDKSRWQQGNVFSCSVMHEAL		Carbamidomethylation
	30	381	402	22	2485.21		IAVEWESNGQPENNYKTTPPVL		X
	31	381	408	28	3093.42		IAVEWESNGQPENNYKTTPPVLDSDGSF		X
							Heavy chain [1-450]		72.4% coverage

[truncated: 5 more sheets: Table S11, Table S12, Table S13, Table S14, Table S15]
